# Supplementary material for: A silver-catalyzed [3 + 3]-annulation cascade of alkynyl alcohols and α,β-unsaturated ketones for the regioselective assembly of chromanes
Source: Royal Society of Chemistry journal article supplement (doi:10.1039/d1qo01643a), 2021-12-17

## Supplementary Information

---

### Silver-catalyzed [3+3]-annulation cascade of alkynyl alcohols and $\alpha,\beta$ -unsaturated ketones for the regioselective assembly of chromanes

Ashwini K. Nakate,<sup>a,b</sup> Sagar S. Thorat,<sup>a,b</sup> Shailja Jain,<sup>c,b</sup> Gamidi Rama Krishna,<sup>d</sup> Kumar Vanka<sup>c,b</sup> and Ravindar Kontham<sup>\*,a,b</sup>

<sup>a</sup>Organic Chemistry Division, CSIR-National Chemical Laboratory, Dr. Homi Bhabha Road, Pune-411008, India.

<sup>b</sup>Academy of Scientific and Innovative Research (AcSIR), Ghaziabad-201002, India. Centre for Materials Characterization, CSIR-National Chemical Laboratory, Dr. Homi Bhabha Road, Pune-411008, India.

<sup>c</sup>Physical and Materials Chemistry Division, CSIR-National Chemical Laboratory, Dr. Homi Bhabha Road, Pune-411008, India.

<sup>d</sup>Centre for Materials Characterization, CSIR-National Chemical Laboratory, Dr. Homi Bhabha Road, Pune-411008, India.

\* Corresponding Author, E-mail: [k.ravindar@ncl.res.in](mailto:k.ravindar@ncl.res.in); [konthamravindar@gmail.com](mailto:konthamravindar@gmail.com)

---

## Table of Contents

| Sr. No | Contents                                                                                                                                                           | Page No |
|--------|--------------------------------------------------------------------------------------------------------------------------------------------------------------------|---------|
| 1.     | General Information                                                                                                                                                | S2      |
| 2.     | Scheme S1. Known synthetic strategies for chromanes                                                                                                                | S3      |
| 3.     | Table S1. Reaction optimization studies                                                                                                                            | S4      |
| 4.     | General Procedure for the synthesis of chromanes ( <b>5</b> or <b>E5</b> ) from alkynols ( <b>2</b> ) and $\alpha,\beta$ -unsaturated ketones ( <b>4</b> )         | S4      |
| 5.     | Synthesis of alkynols ( <b>2</b> )                                                                                                                                 | S5      |
| 6.     | Synthesis of $\alpha,\beta$ -unsaturated ketones ( <b>4</b> )                                                                                                      | S7      |
| 7.     | <i>General Procedure</i> for the synthesis of protected chalcones ( <b>4o-4r</b> )                                                                                 | S9      |
| 8.     | Synthesis and characterization of chromanes ( <b>5</b> ) from alkynols ( <b>2</b> ) and $\alpha,\beta$ -unsaturated ketones ( <b>4</b> )                           | S10     |
| 9.     | Synthesis and characterization of heterocyclic chromanes ( <b>5</b> or <b>E5</b> ) from alkynols ( <b>2</b> ) and $\alpha,\beta$ -unsaturated ketones ( <b>4</b> ) | S30     |
| 10.    | Scheme S2. Unsuccessful [3+3]-annulation experiments                                                                                                               | S34     |
| 11.    | X-ray crystallography data                                                                                                                                         | S35     |
| 12.    | Supporting experiments for the postulated reaction mechanism                                                                                                       | S38     |
| 13.    | Quantum chemical calculations                                                                                                                                      | S43     |
| 14.    | <sup>1</sup> H, <sup>13</sup> C, and 2D NMR Spectra                                                                                                                | S52     |

**1. General Information:**

All reactions were performed under argon atmosphere with oven (80 °C) or flame-dried glassware with a septum seal. Tetrahydrofuran (THF) was distilled from sodium-benzophenone under the argon atmosphere immediately before use. Anhydrous dichloromethane, dichloroethane, methanol, and fluorobenzene were purchased from commercial sources and used without any further treatment. Reaction temperatures are reported as the temperature of the bath surrounding the reaction vessel, and 30 °C corresponds to the room temperature (rt) of the laboratory when the experiments were carried out. Analytical thin-layer chromatography (TLC) was performed on TLC Silica gel 60 F254. Visualization was accomplished with short wave UV light, anisaldehyde or KMnO<sub>4</sub> staining solutions followed by heating. Chromatography was performed on silica gel (100-200 mesh) by standard techniques eluting with solvents as indicated. <sup>1</sup>H and <sup>13</sup>C NMR spectra were recorded on Bruker AV 200, 400, and 500 in solvents as indicated. Chemical shifts (δ) are given in ppm. The residual solvent signals were used as references and the chemical shifts converted to the TMS scale (CDCl<sub>3</sub>: δ H = 7.27 ppm, δ C = 77.00 ppm), the following abbreviations were used: s, singlet; d, doublet; t, triplet; q, quartet; m, multiplet; dd, doublet of doublet; td, triplet doublet; and br, broad. HRMS data were recorded on a Thermo Scientific Q-Exactive, Accela 1250 pump, FT-IR instrument (Bruker Alpha Model) at normal temperature with a NaCl pellet (IR grade). Experimental procedures for all new compounds and known compounds without published experimental procedures are described below. Compounds that are not presented in the main text (manuscript) are numbered starting from **S1**.

-----

## 2. Scheme S1. Known synthetic strategies for chromanes 5.

## a. From pre-functionalized arenes

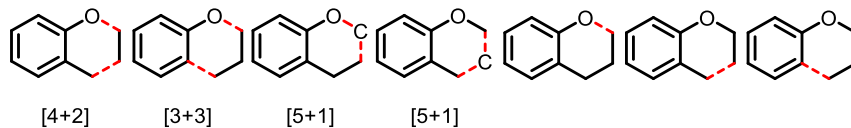

## b. From dihydropyran derivatives

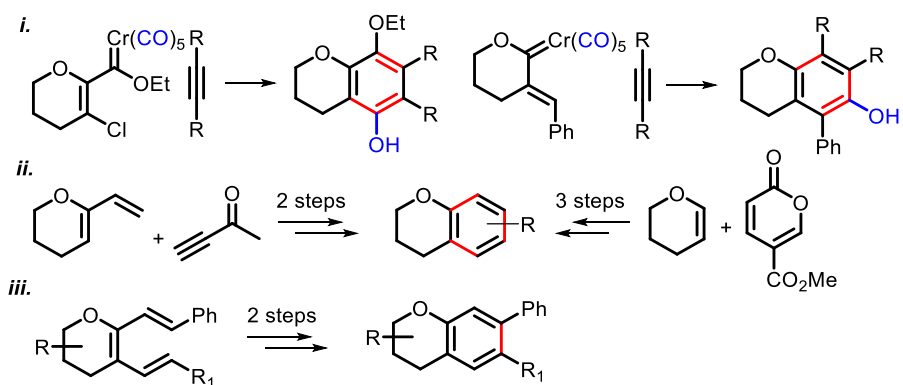

## c. Through hexadehydro Diels-Alder reaction of triynes

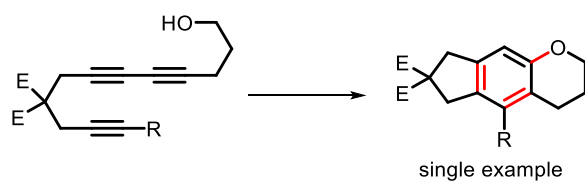

## d. Through Wulff-Dötz reaction

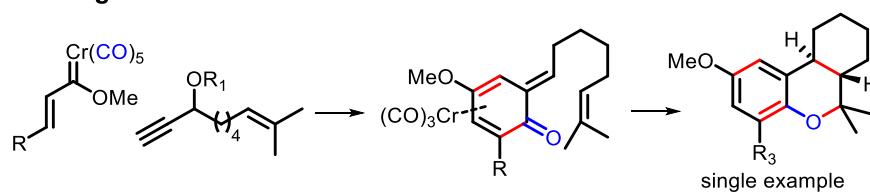

3. Table S1. Reaction optimization studies<sup>a</sup>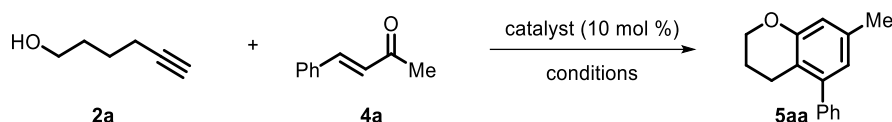

| Entry | Catalyst             | Solvent                                | Yield <sup>b</sup> (%) |
|-------|----------------------|----------------------------------------|------------------------|
| 1     | AgCl                 | PhF, rt, 12 h                          | - <sup>c</sup>         |
| 2     | AgBr                 | PhF, rt, 12 h                          | - <sup>c</sup>         |
| 3     | AgI                  | PhF, rt, 12 h                          | - <sup>c</sup>         |
| 4     | AgNO <sub>3</sub>    | PhF, rt, 12 h                          | - <sup>c</sup>         |
| 5     | Ag <sub>2</sub> O    | PhF, rt, 12 h                          | - <sup>c</sup>         |
| 6     | AuCl                 | CH <sub>2</sub> Cl <sub>2</sub> , 12 h | 70                     |
| 7     | Hg(OTf) <sub>2</sub> | CH <sub>2</sub> Cl <sub>2</sub> , 12 h | 68                     |
| 8     | Bi(OTf) <sub>3</sub> | CH <sub>2</sub> Cl <sub>2</sub> , 12 h | 53                     |
| 9     | Bi(OTf) <sub>3</sub> | PhF, 85 °C                             | 65                     |
| 10    | Sc(OTf) <sub>3</sub> | CH <sub>2</sub> Cl <sub>2</sub>        | 15                     |
| 11    | Fe(OTf) <sub>3</sub> | CH <sub>2</sub> Cl <sub>2</sub>        | 15                     |
| 12    | Fe(OTf) <sub>3</sub> | PhF, 85 °C                             | 42                     |
| 13    | Ni(OTf) <sub>2</sub> | CH <sub>2</sub> Cl <sub>2</sub>        | - <sup>c</sup>         |
| 14    | Cu(OTf) <sub>2</sub> | CH <sub>2</sub> Cl <sub>2</sub>        | 43                     |
| 15    | Zn(OTf) <sub>2</sub> | CH <sub>2</sub> Cl <sub>2</sub>        | - <sup>c</sup>         |
| 16    | In(OTf) <sub>3</sub> | CH <sub>2</sub> Cl <sub>2</sub>        | 52                     |
| 17    | Yb(OTf) <sub>3</sub> | CH <sub>2</sub> Cl <sub>2</sub>        | - <sup>c</sup>         |

<sup>a</sup>Unless otherwise noted all reactions were carried out with **4a** (1 mmol), **2a** (2 mmol), and catalyst (10 mol %) at rt for 6 h. <sup>b</sup>Isolated yields of **5aa**. <sup>c</sup>No reaction was observed, both starting materials **2a** and **3a** were found to be intact. Tf = triflate (CF<sub>3</sub>SO<sub>2</sub>).

4. General Procedure for the synthesis of chromanes (**5** or **E5**) from alkylnols (**2**) and  $\alpha,\beta$ -unsaturated ketones (**4**):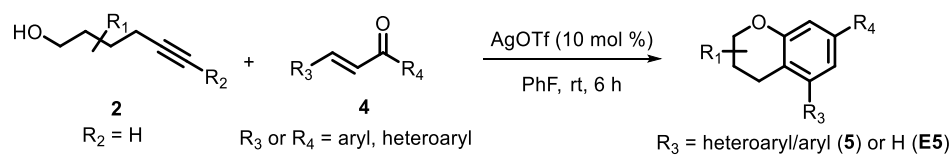

Alkylnol **2**(1.01 mmol) and  $\alpha,\beta$ -unsaturated ketone **4**(0.505mmol) were taken into a single neck 10 mL round bottom flask equipped with positive argon flow, then dissolved in 2 mL of

anhydrous PhF. Catalyst (AgOTf, 0.101mmol) was added under an argon atmosphere at room temperature. The resulting reaction mixture was stirred at rt for six h. After completion of the reaction (monitored by TLC, visualized using UV, anisaldehyde, and KMnO<sub>4</sub> staining solutions), quenched with saturated aqueous NaHCO<sub>3</sub> solution, then extracted with CH<sub>2</sub>Cl<sub>2</sub> (2x5 mL), then washed with brine solution (10 mL). The combined organic layers were dried over anhydrous Na<sub>2</sub>SO<sub>4</sub> and filtered through a sintered glass funnel. The filtrate was concentrated under reduced pressure and purified using silica-gel column chromatography (SiO<sub>2</sub>, 100-200 mesh) to afford the corresponding chromanes **5** or **E5**.

-----

## 5. Synthesis of alkynols (2):

### 5.1. Synthesis of alkynols **2a**, **2b**, **2d**, **2e**, and **2f**: Prepared using reported procedures<sup>1,2,3</sup>

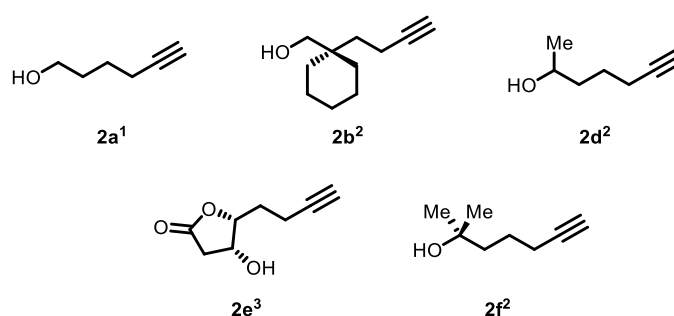

### 5.2. Synthesis of alkynol **2c**:

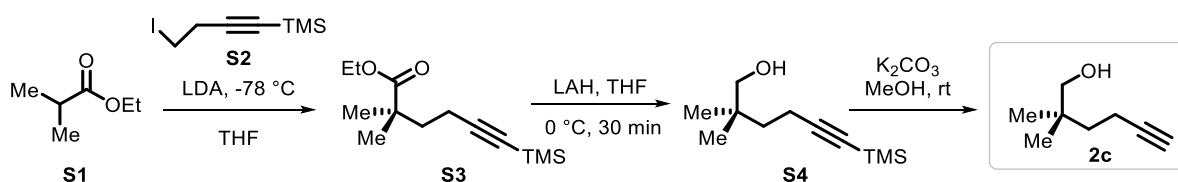

**2,2-Dimethyl-6-(trimethylsilyl)hex-5-yn-1-ol (S4)**: To a flame dried (100 mL) two neck round bottom flask, anhydrous THF (20 mL) was added under argon atmosphere and cooled to 0 °C, to this diisopropylamine (1.18 g, 11.74mmol) followed by *n*-butyllithium (1.6 M in hexanes, 7.95 mL, 12.7 mmol) was added dropwise at 0 °C and stirred for 45 min at 0 °C to generate LDA solution. To this LDA solution, was added ethyl isobutyrate (**S1**)(1 g, 9.79 mmol) in THF (3 mL) and stirred the reaction mixture at -78 °C for 30 min, then warmed to 0 °C and stirred for another 30 min. The reaction mixture was cooled back to -78 °C and (4-

<sup>1</sup>1a were purchased from commercial sources.

<sup>2</sup>Thorat, S. S.; Kataria, P.; Kontham, R. *Org. Lett.* **2018**, 20, 872-875.

<sup>3</sup>Nakate, A. K.; Pratapure, M. S.; Kontham, R. *Org. Biomol. Chem.*, **2018**, 16, 3229–3240

iodobut-1-yn-1-yl)trimethylsilane (**S2**) (3.69 g, 14.68 mmol) was added dropwise. The resulting mixture was stirred at -78 °C for 1 h and warmed to rt and stirred overnight. Then, the reaction was quenched with saturated aqueous NH<sub>4</sub>Cl solution, and extracted with EtOAc (3x20 mL), combined organic layers were dried over anhydrous Na<sub>2</sub>SO<sub>4</sub>, concentrated under reduced pressure to afford ethyl 2,2-dimethyl-6-(trimethylsilyl)hex-5-ynoate (**S3**) TLC: *R<sub>f</sub>* = 0.7 (SiO<sub>2</sub>, 10% EtOAc/hexanes), this crude product was subjected to the next step without further purification.

Lithium aluminium hydride (0.74 g, 19.58 mmol) was dissolved in a 20 mL of anhydrous THF in a 100 mL two neck round bottom flask under argon atmosphere, then ethyl 2,2-dimethyl-6-(trimethylsilyl)hex-5-ynoate (**S3**) in (5 mL) THF was added drop by drop at 0 °C, and the reaction mixture was stirred for 30 min at the same temperature, after completion of the reaction monitored by TLC quenched with a saturated aqueous solution of sodium sulphate (very carefully). After quenching the reaction, the mixture diluted with 50 mL EtOAc and stirred for 1h to obtain the white powder, which was filtered through Celite. The solvent was evaporated under reduced pressure and the resulting crude product was purified by silica gel column chromatography (SiO<sub>2</sub>, 8% EtOAc/hexanes) to afford 2,2-dimethyl-6-(trimethylsilyl)hex-5-yn-1-ol (**S4**) (0.726 g, 43% for two steps) as a colorless liquid. TLC: *R<sub>f</sub>* = 0.8 (SiO<sub>2</sub>, 20% EtOAc/hexanes); <sup>1</sup>H NMR (CDCl<sub>3</sub>, 400 MHz): δ 3.35 (s, 2H), 2.23 (t, *J* = 7.32 Hz, 2H), 1.55 (t, *J* = 7.32 Hz, 2H), 0.88 (s, 6H), 0.15 (s, 9H); <sup>13</sup>C NMR (CDCl<sub>3</sub>, 101 MHz): δ 108.3, 84.2, 70.9, 37.3, 35.2, 23.9, 14.9, 0.04.

**2,2-Dimethylhex-5-yn-1-ol (2c):** To a stirred solution of 2,2-dimethyl-6-(trimethylsilyl)hex-5-yn-1-ol (**S4**) (0.8 g, 4.03 mmol) in MeOH (20 mL) was added K<sub>2</sub>CO<sub>3</sub> (1.2 g, 8.68 mmol) at room temperature. The reaction mixture was stirred for 6 h. After quenched with H<sub>2</sub>O, the mixture was extracted twice with ether. The combined organic extracts were washed with brine, dried over Na<sub>2</sub>SO<sub>4</sub>, and concentrated under reduced pressure. The residue was purified by silica gel column chromatography (SiO<sub>2</sub>, 5% EtOAc /hexanes) to give 2,2-dimethylhex-5-yn-1-ol (**2c**) (0.402 g, 79%) as a colourless oil. TLC: *R<sub>f</sub>* = 0.5 (SiO<sub>2</sub>, 20% EtOAc/hexanes); <sup>1</sup>H NMR (CDCl<sub>3</sub>, 400 MHz): δ 3.35 (s, 2H), 2.19 (td, *J* = 7.63, 3.05 Hz, 2H), 1.97-1.95 (m, 1H), 1.60-1.54 (m, 2H), 0.89 (s, 6H); <sup>13</sup>C NMR (CDCl<sub>3</sub>, 101 MHz): δ 85.4, 71.1, 67.9, 37.3, 35.1, 23.7, 13.5.

### 3.3. (S)-5-(Hydroxymethyl)-1-(prop-2-yn-1-yl)pyrrolidin-2-one(2g):

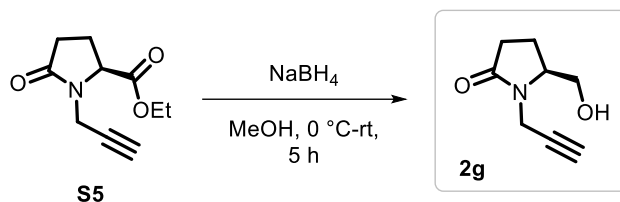

To a solution of ethyl (*S*)-5-oxo-1-(prop-2-yn-1-yl)pyrrolidine-2-carboxylate (**S5**)<sup>4</sup>(0.4 g, 2.05 mmol) in methanol (10 mL), sodium borohydride (0.155 g, 4.1 mmol) was added batch wise at 0 °C. The reaction mixture was stirred at 0 °C for 30 min. and then at rt for 5 h after which the solvent was evaporated under reduced pressure. Aqueous NH<sub>4</sub>Cl solution (5 mL) was added to the resulting suspension, and then extracted with EtOAc (3×5 mL). Organic phases were combined and dried over anhydrous Na<sub>2</sub>SO<sub>4</sub>, filtered and the solvent was evaporated under reduced pressure, and the resulting crude product was purified by silica gel column chromatography (SiO<sub>2</sub>, 10% MeOH/CH<sub>2</sub>Cl<sub>2</sub>) to afford (*S*)-5-(hydroxymethyl)-1-(prop-2-yn-1-yl)pyrrolidin-2-one (**2g**) (0.302 g, 96%) as a colourless liquid. TLC: *R<sub>f</sub>* = 0.1 (SiO<sub>2</sub>, 70% EtOAc/hexanes); <sup>1</sup>H NMR (CDCl<sub>3</sub>, 400 MHz): δ 4.32 (d, *J* = 17.70 Hz, 1H) , 4.02-3.82 (m, 3H), 3.69-3.56 (m, 1H), 2.86 (br.s., 1H), 2.53-2.43 (m, 1H), 2.37-2.29 (m, 1H), 2.18-2.07 (m, 1H), 2.04-1.95 (m, 1H); <sup>13</sup>C NMR (CDCl<sub>3</sub>, 101 MHz): δ 175.5, 78.3, 71.9, 62.5, 59.2, 30.5, 30.3, 20.7.

-----

**6. Synthesis of  $\alpha,\beta$ -unsaturated ketones (4):** Prepared using reported procedures (see below details of chemical structures with related referenes.<sup>5,6,7,8,9,10,11,12,13,14,15,16,17,18,19, 20</sup>

<sup>4</sup>Amit, B.; Subhash, C. G.; Amit, K. D.; Valerio, B. *Org. Biomol. Chem.*, **2005**, *3*, 4050-4052.

<sup>5</sup>Ajay, H. B.; Gurunath, S. *ACS Omega*, **2019**, *4*, 9636-9644.

<sup>6</sup>Titu, D.; Chadha, A. *Tetrahedron*, **2008**, *19*, 1698-1701.

<sup>7</sup>Wang, Y.; Franzen, R. *Synlett*, **2012**, *6*, 925-929.

<sup>8</sup>Gopinath, V. K.; Swarup, H. A.; Mantelingu, K.; Rangappa, K. S. *Synlett*, **2019**, *30*, 12-20.

<sup>9</sup>Robinson, T. P.; Hubbard, R. B.; IV, Ehlers, T. J.; Arbiser, J. L.; Goldsmith, D. J.; Bowen, J. P. *Bioorg. Med. Chem.*, **2005**, *13*, 4007-4013.

<sup>10</sup>Hassan, S. Y. *J. Braz. Chem. Soc.*, **2011**, *22*, 1286-1298.

<sup>11</sup>D'Aleo, A.; Karapetyan, A.; Heresanu, V.; Giorgi, M.; Fages, F. *Tetrahedron*, **2015**, *71*, 2255-2259.

<sup>12</sup>Singh, G.; Arora, A.; Kalra, P.; Maurya, I. K.; Ruizc, C. E.; Estebanc, A. M.; Sinha, S.; Goyal, K. Sehgal, R. *Bioorg. Med. Chem.*, **2019**, *27*, 188-195.

<sup>13</sup>Astekar, K. D.; Staples, R. J.; Borhan, B. *Org. Lett.*, **2011**, *13*, 5732-5735.

<sup>14</sup>Rajasekar, S.; Anbarasan, P. *Org. Lett.*, **2019**, *21*, 3067-3071.

<sup>15</sup>Liu, S.; Cui, P.; Wang, J.; Zhou, H.; Liu, Q.; Ly, J. *Org. Biomol. Chem.*, **2019**, *17*, 264-267.

<sup>16</sup>Basnet, A.; Thapa, P. Karki, R.; Na, Y.; Jahng, Y.; Jeong, B. S.; Jeong, T. C. Lee, C. S.; Lee, E. S. *Bioorg. Med. Chem.*, **2007**, *15*, 4351-4359.

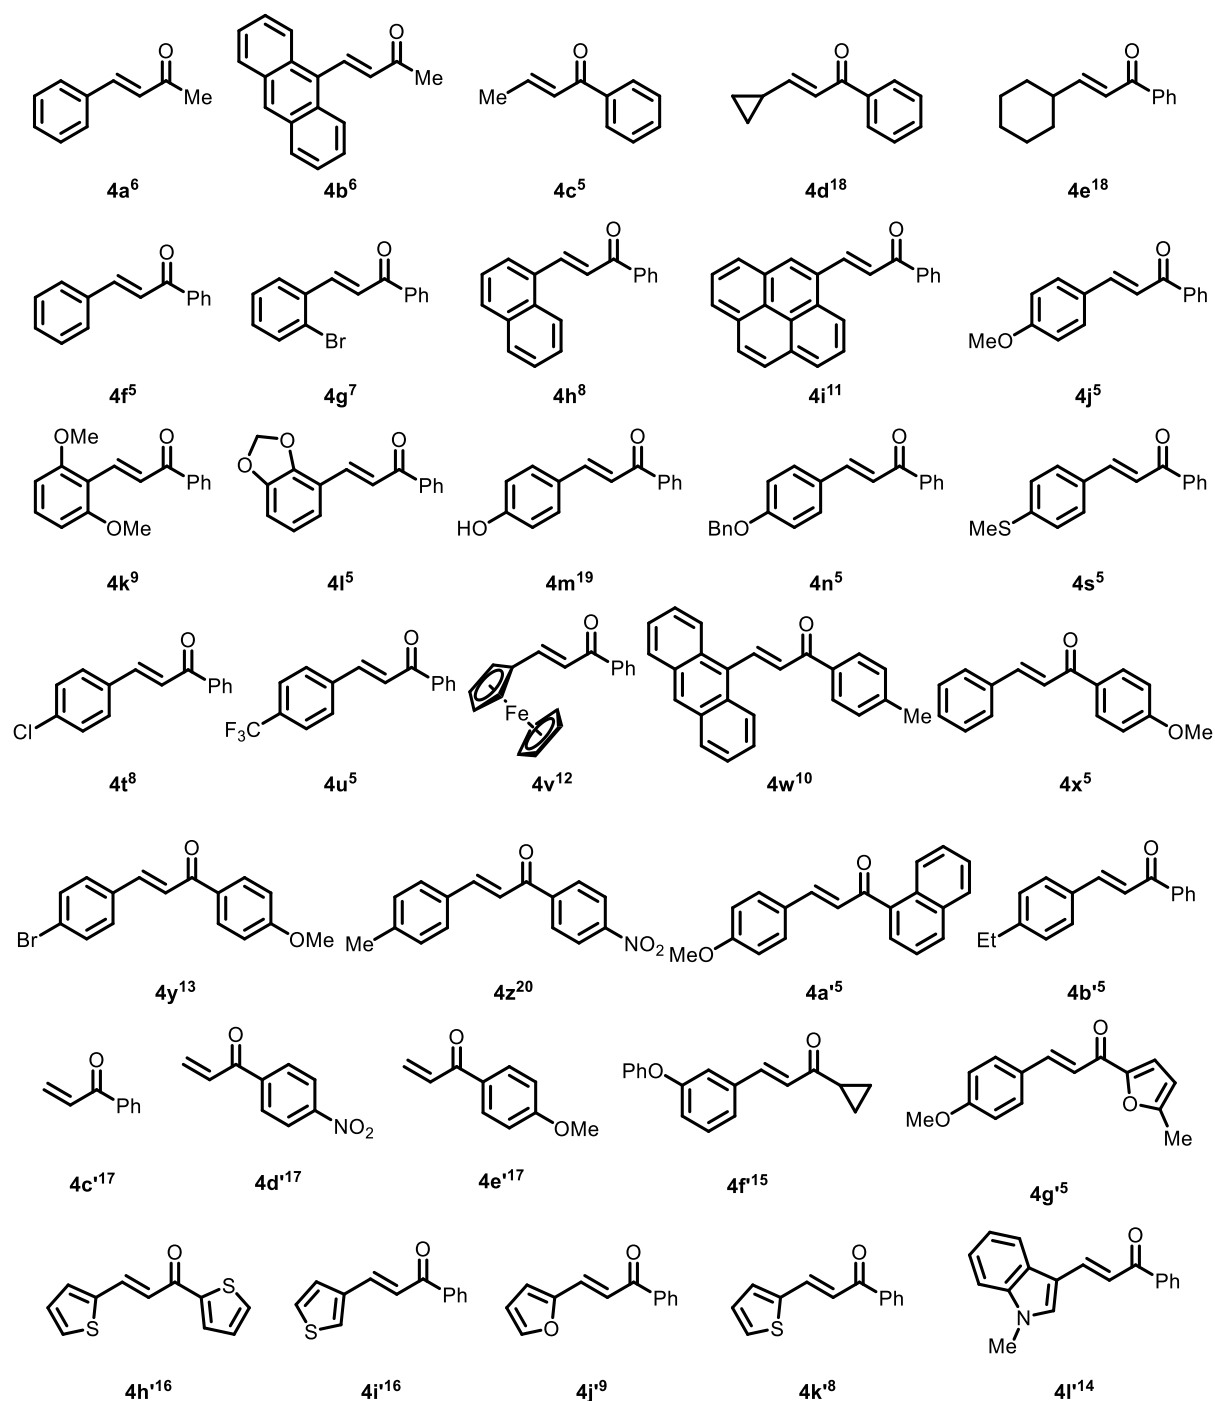

-----

<sup>17</sup>Cheng, S.; Yu, S. *Org. Biomol. Chem.*, **2014**, *12*, 8607-8610.<sup>18</sup>Thomson, C. J.; Barber, D. M.; Dixon, D. J. *Angew. Chem. Int. Ed.*, **2019**, *58*, 8, 2469-2473.<sup>19</sup>Salfeena, C. T.; Basavaraja, Ashitha, K. T.; Kumar, V. P.; Varughese, S.; Cherumuttathu, H. S.; Sasidhar, B. S. *Chem. Commun.*, **2018**, *54*, 12463-12466.<sup>20</sup>Wang, D.; Li, L.; Feng, H.; Sun, H.; Almedida-Velodo, F.; Charavin, M.; Yu, P.; Désaubry, L. *Green Chemistry*, **2018**, *20*, 2775-2780.



### 7. General procedure for the synthesis of protected chalcones (**4o-4r**):

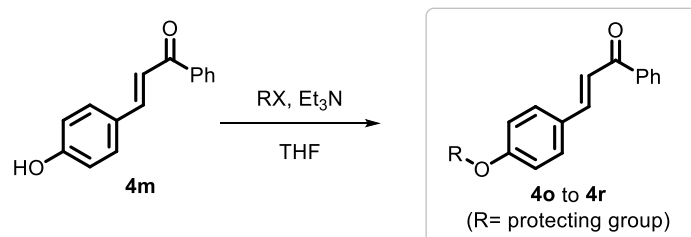

To a solution of 4-hydroxychalcone (**4m**) (10.0 mmol) and triethylamine (12.0 mmol) in anhydrous THF (20 ml) was added drop wise organo-halide (12.0 mmol) and the mixture was stirred at ambient temperature. After a certain reaction time the volatile was concentrated under reduced pressure. The residue was extracted with ethyl acetate (20 ml) and water (20 ml). The organic layer was washed with saturated aqueous solution of sodium hydrogen carbonate (20 mL), 10% aqueous solution of sodium hydrogen sulfonate (20 mL), and brine (20 mL), dried over anhydrous  $\text{Na}_2\text{SO}_4$ , and concentrated under reduced pressure. The solid was purified by recrystallization.

#### (*E*)-3-(4-(Allyloxy)phenyl)-1-phenylprop-2-en-1-one (**4o**):

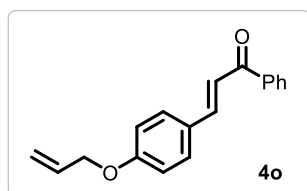

(*E*)-3-(4-(Allyloxy)phenyl)-1-phenylprop-2-en-1-one (**4o**) was prepared by using general procedure as a yellow crystalline solid in 57% yield.  $^1\text{H}$  NMR ( $\text{CDCl}_3$ , 200 MHz):  $\delta$  8.20-7.97 (m, 2H), 7.78 (d,  $J=15.66$  Hz, 1H), 7.69-7.43 (m, 6H), 7.10-6.86 (m, 2H), 6.21-5.91 (m, 1H), 5.59-5.20 (m, 2H), 4.53 (d,  $J=5.18$  Hz, 2H).

#### (*E*)-4-(3-Oxo-3-phenylprop-1-en-1-yl)phenyl 4-methylbenzenesulfonate (**4p**):

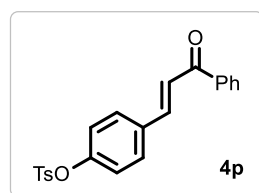

(*E*)-4-(3-Oxo-3-phenylprop-1-en-1-yl)phenyl 4-methylbenzenesulfonate (**4p**) was prepared by using general procedure as a yellow crystalline solid in 68% yield.  $^1\text{H}$  NMR ( $\text{CDCl}_3$ , 200 MHz):  $\delta$  8.00 (d,  $J=7.17$  Hz, 2H), 7.85-7.66 (m, 3H), 7.66-7.41 (m, 6H), 7.31 (d,  $J=8.38$  Hz, 2H), 7.03 (d,  $J=8.60$  Hz, 2H), 2.44 (s, 3H).

#### (*E*)-4-(3-Oxo-3-phenylprop-1-en-1-yl)phenylmethanesulfonate (**4q**):

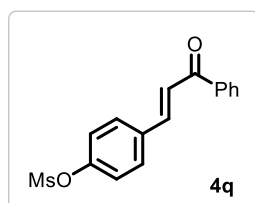

(*E*)-4-(3-Oxo-3-phenylprop-1-en-1-yl)phenylmethanesulfonate (**4q**) was prepared by using general procedure as a yellow crystalline solid in 80% yield.  $^1\text{H}$  NMR ( $\text{CDCl}_3$ , 200 MHz):  $\delta$  8.14-7.94 (m, 2H), 7.81-7.47 (m, 7H), 7.33 (d,  $J=8.71$  Hz, 2H), 3.18 (s, 3H).

**(E)-4-(3-Oxo-3-phenylprop-1-en-1-yl)phenyl acetate (4r):**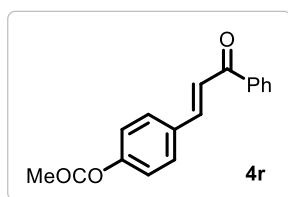

(*E*)-4-(3-Oxo-3-phenylprop-1-en-1-yl)phenyl acetate (**4r**) was prepared by using general procedure as a light yellow solid in 77% yield. <sup>1</sup>H NMR (CDCl<sub>3</sub>, 200 MHz): δ 8.16-7.97 (m, 2H), 7.86-7.43 (m, 7H), 7.14 (d, *J*=8.49 Hz, 2H), 2.30 (s, 3H).

-----

**8. Synthesis and characterization of chromanes (5) from alkynols (2) and  $\alpha,\beta$ -unsaturated ketones (4)****7-Methyl-5-phenylchromane (5aa):**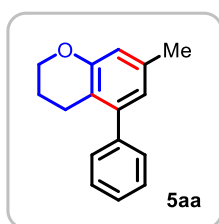

Following the *General Procedure*, to the mixture of 5-hexyn-1-ol (**2a**) (0.1 g, 1.01 mmol) and (*E*)-4-phenylbut-3-en-2-one (**4a**) (0.073 g, 0.505 mmol) in anhydrous PhF (2 mL) was added AgOTf (0.012 g, 0.05 mmol) under argon atmosphere at room temperature and reaction mixture was stirred for 6h at rt. Purification of the crude product by column chromatography (SiO<sub>2</sub>, 1% EtOAc/hexanes) afforded 7-methyl-5-phenylchromane (**5aa**) (0.086 g, 87%). TLC: *R<sub>f</sub>* = 0.90 (SiO<sub>2</sub>, 10% EtOAc/hexanes); <sup>1</sup>H NMR (CDCl<sub>3</sub>, 500 MHz): δ 7.43-7.38 (m, 2H), 7.37-7.31 (m, 3H), 6.67 (d, *J* = 4.96 Hz, 2H), 4.22-4.18 (m, 2H), 2.62-2.58 (m, 2H), 2.32 (s, 3H), 1.94-1.88 (m, 2H); <sup>13</sup>C NMR (CDCl<sub>3</sub>, 126 MHz): δ 154.8, 142.8, 141.3, 136.7, 129.1, 127.9, 126.8, 122.7, 116.9, 116.3, 66.2, 23.9, 22.6, 21.0; HRMS (ESI) *m/z* calcd for C<sub>16</sub>H<sub>17</sub>O [M+H]<sup>+</sup> 225.1274, found 225.1273.

**5-(Anthracen-9-yl)-7-methyl-3,4,5,8-tetrahydro-2H-chromene (T3ab) and 5-(Anthracen-9-yl)-7-methylchromane (5ab):**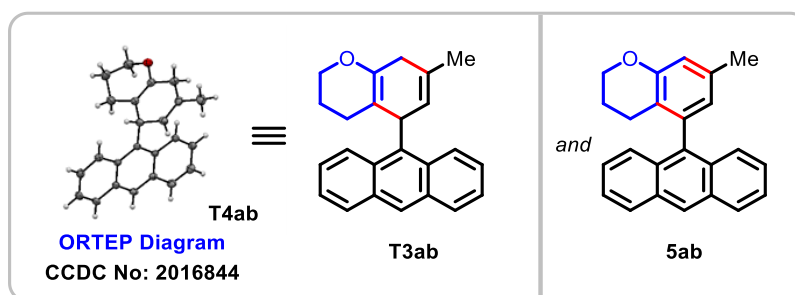

Following the *General Procedure*, to the mixture of 5-hexyn-1-ol (**2a**) (0.1 g, 1.01 mmol) and (*E*)-4-(anthracen-9-yl)but-3-en-2-one (**4b**) (0.124 g, 0.505 mmol) in anhydrous PhF (2 mL) was added AgOTf (0.012 g, 0.05 mmol) under argon atmosphere at room temperature and reaction mixture was stirred for 6h at rt. Purification of the crude product by column

chromatography (SiO<sub>2</sub>, 1% EtOAc/hexanes) afforded a mixture of two products 5-(anthracen-9-yl)-7-methyl-3,4,5,8-tetrahydro-2H-chromene (**T3ab**) (0.056 g, 34%) as a yellow crystals and 5-(anthracen-9-yl)-7-methylchromane (**5ab**) as a yellow powder (0.063 g, 39%). TLC:  $R_f = 0.9$  (SiO<sub>2</sub>, 10% EtOAc/hexanes).

**T3ab**: <sup>1</sup>H NMR (CDCl<sub>3</sub>, 500 MHz):  $\delta$  8.56-8.52 (m, 1H), 8.46 (d,  $J = 9.14$  Hz, 1H), 8.38 (s, 1H), 8.04-7.97 (m, 2H), 7.53-7.41 (m, 3H), 7.39-7.34 (m, 1H), 5.63-5.57 (m, 1H), 5.54-5.51 (m, 1H), 4.06-3.99 (m, 1H), 3.91-3.85 (m, 1H), 2.93 (d,  $J = 8.20$  Hz, 2H), 1.78 (s, 3H), 1.77-1.59 (m, 4H); <sup>13</sup>C NMR (CDCl<sub>3</sub>, 126 MHz):  $\delta$  144.3, 134.6, 131.8, 131.6, 130.9, 130.6, 129.5, 129.3, 129.0, 127.0, 125.8, 125.2, 124.8, 124.5, 124.2, 123.6, 106.8, 65.7, 41.7, 33.6, 22.9, 22.7, 22.4; HRMS (ESI)  $m/z$  calcd for C<sub>24</sub>H<sub>23</sub>O [M+H]<sup>+</sup> 327.1743, found 327.1745.

**5ab**: <sup>1</sup>H NMR (CDCl<sub>3</sub>, 400 MHz):  $\delta$  8.49 (s, 1H), 8.06 (d,  $J = 8.39$  Hz, 2H), 7.62 (d,  $J = 9.16$  Hz, 2H), 7.51-7.44 (m, 2H), 7.41-7.35 (m, 2H), 6.84 (s, 1H), 6.70 (s, 1H), 4.17 (t,  $J = 5.34$  Hz, 2H), 2.37 (s, 3H), 2.08-2.03 (m, 2H), 1.84-1.73 (m, 2H); <sup>13</sup>C NMR (CDCl<sub>3</sub>, 101 MHz):  $\delta$  155.5, 139.8, 139.4, 137.6, 137.0, 131.4, 129.9, 129.4, 128.5, 126.7, 126.5, 125.6, 125.2, 121.8, 121.3, 114.3, 66.4, 22.5, 22.3, 21.1; IR (KBr, cm<sup>-1</sup>):  $\nu$  2929, 2860, 1612, 1575, 1454, 1215, 1138, 908, 733, 642; HRMS (ESI)  $m/z$  calcd for C<sub>24</sub>H<sub>21</sub>O [M+H]<sup>+</sup> 325.1587, found 325.1586.

#### 5-(Anthracen-9-yl)-7-methylchromane (**5ab**) (prepared from **T3ab**):

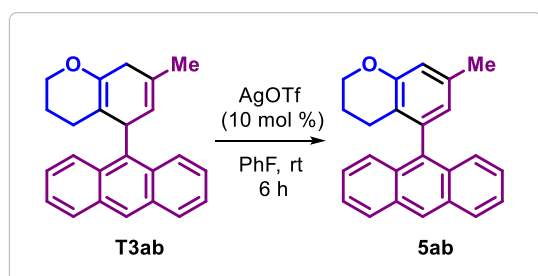

Following the *General Procedure*, to the mixture of 5-(anthracen-9-yl)-7-methyl-3,4,5,8-tetrahydro-2H-chromene (**T3ab**) (0.050 g, 0.15 mmol) in anhydrous PhF (2.0 mL) was added AgOTf (0.003 g, 0.015 mmol) under argon atmosphere at room temperature and reaction

mixture was stirred for 6 h at rt. Purification of the crude product by column chromatography (SiO<sub>2</sub>, 1% EtOAc/hexanes) afforded 5-(anthracen-9-yl)-7-methylchromane (**5ab**) (0.035 g, 71%). TLC:  $R_f = 0.9$  (SiO<sub>2</sub>, 10% EtOAc/hexanes); <sup>1</sup>H NMR (CDCl<sub>3</sub>, 200 MHz):  $\delta$  8.49 (s, 1H), 8.06 (d,  $J = 7.94$  Hz, 2H), 7.62 (d,  $J = 9.16$  Hz, 2H), 7.54-7.32 (m, 4H), 7.41-7.35 (m, 2H), 6.84 (s, 1H), 6.70 (s, 1H), 4.18 (t,  $J = 5.07$  Hz, 2H), 2.37 (s, 3H), 2.06 (t,  $J = 6.39$  Hz, 2H), 1.88-1.72 (m, 2H).

**5-Methyl-7-phenylchromane (5ac):**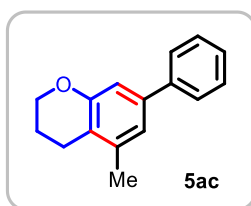

Following the *General Procedure*, to the mixture of 5-hexyn-1-ol (**2a**) (0.1 g, 1.01 mmol) and (*E*)-1-phenylbut-2-en-1-one (**4c**) (0.073 g, 0.505 mmol) in anhydrous PhF (2 mL) was added AgOTf (0.012 g, 0.05 mmol) under argon atmosphere at room temperature and reaction mixture was stirred for 6h at rt. Purification of the crude product by column chromatography (SiO<sub>2</sub>, 1% EtOAc/hexanes) afforded 7-methyl-5-phenylchromane (**5ac**) (0.73 g, 68%). TLC:  $R_f = 0.90$  (SiO<sub>2</sub>, 10% EtOAc/hexanes); <sup>1</sup>H NMR (CDCl<sub>3</sub>, 400 MHz):  $\delta$  7.61-7.55 (m, 2H), 7.46-7.40 (m, 2H), 7.36-7.30 (m, 1H), 7.03-6.94 (m, 2H), 4.23-4.17 (m, 2H), 2.70 (t,  $J = 6.63$  Hz, 2H), 2.30 (s, 3H), 2.13-2.05 (m, 2H); <sup>13</sup>C NMR (CDCl<sub>3</sub>, 101 MHz):  $\delta$  155.3, 141.0, 139.8, 138.0, 128.6, 127.0, 126.9, 120.6, 120.2, 113.1, 66.0, 22.5, 22.4, 19.3; HRMS (ESI)  $m/z$  calcd for C<sub>16</sub>H<sub>17</sub>O [M+H]<sup>+</sup> 225.1274, found 225.1276.

**5-Cyclopropyl-7-phenylchromane (5ad):**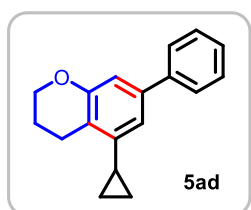

Following the *General Procedure*, to the mixture of 5-hexyn-1-ol (**2a**) (0.1 g, 1.01 mmol) and (*E*)-3-cyclopropyl-1-phenylprop-2-en-1-one (**4d**) (0.086 g, 0.505 mmol) in anhydrous PhF (2 mL) was added AgOTf (0.012 g, 0.05 mmol) under argon atmosphere at room temperature and reaction mixture was stirred for 8 h at rt. Purification of the crude product by column chromatography (SiO<sub>2</sub>, 1% EtOAc/hexanes) afforded 5-cyclopropyl-7-phenylchromane (**5ad**) (0.085 g, 67%). TLC:  $R_f = 0.9$  (SiO<sub>2</sub>, 10% EtOAc/hexanes); <sup>1</sup>H NMR (CDCl<sub>3</sub>, 400 MHz):  $\delta$  7.59-7.53 (m, 2H), 7.46-7.39 (m, 2H), 7.37-7.30 (m, 1H), 6.93 (d,  $J = 1.88$  Hz, 1H), 6.83 (d,  $J = 1.50$  Hz, 1H), 4.21 (t,  $J = 5.13$  Hz, 2H), 2.93 (t,  $J = 6.63$  Hz, 2H), 2.15-2.07 (m, 2H), 1.90-1.83 (m, 1H), 0.99-0.92 (m, 2H), 0.77-0.65 (m, 2H); <sup>13</sup>C NMR (CDCl<sub>3</sub>, 101 MHz):  $\delta$  155.1, 142.7, 141.2, 139.8, 128.6, 127.1, 126.9, 121.4, 116.7, 113.3, 66.0, 22.5, 22.2, 13.1, 6.8; IR (KBr, cm<sup>-1</sup>):  $\nu$  3019, 2955, 2927, 2855, 1663, 1612, 1600, 1583, 1565, 1518, 1502, 1410, 1172, 962, 850, 771, 699, 625; HRMS (ESI)  $m/z$  calcd for C<sub>18</sub>H<sub>19</sub>O [M+H]<sup>+</sup> 251.1430 found 251.1432.

**5-Cyclohexyl-7-phenylchromane (5ae):**

Following the *General Procedure*, to the mixture of 5-hexyn-1-ol (**2a**) (0.1 g, 1.01 mmol) and (*E*)-3-cyclohexyl-1-phenylprop-2-en-1-one (**4e**) (0.108 g, 0.505 mmol) in anhydrous PhF (2 mL) was add AgOTf (0.012 g, 0.05 mmol) under argon atmosphere at room temperature and reaction mixture was stirred for 8h at rt. Purification of the crude product by column

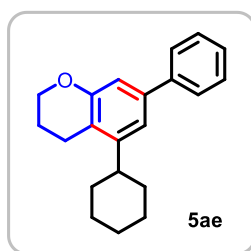

chromatography (SiO<sub>2</sub>, 1% EtOAc/hexanes) afforded 5-cyclohexyl-7-phenylchromane (**5ae**) (0.083 g, 56%). TLC:  $R_f$  = 0.9 (SiO<sub>2</sub>, 10% EtOAc/hexanes); <sup>1</sup>H NMR (CDCl<sub>3</sub>, 400 MHz):  $\delta$  7.60-7.56 (m, 2H), 7.45-7.39 (m, 2H), 7.35-7.30 (m, 1H), 7.05 (d,  $J$  = 2.3 Hz, 1H), 6.92 (d,  $J$  = 2.3 Hz, 1H), 4.23-4.18 (m, 2H), 2.84-2.78 (m, 2H), 2.73-2.65 (m, 1H), 2.11-2.04 (m, 2H), 1.92-1.76 (m, 5H), 1.55-1.33 (m, 5H); <sup>13</sup>C NMR (CDCl<sub>3</sub>, 101 MHz):  $\delta$  155.2, 147.5, 141.4, 140.0, 128.6, 127.0, 118.8, 116.6, 113.0, 65.8, 39.5, 33.8, 27.2, 26.3, 22.6, 21.8; HRMS (ESI)  $m/z$  calcd for C<sub>21</sub>H<sub>25</sub>O [M+H]<sup>+</sup> 293.1900, found 293.1897.

### 5,7-Diphenylchromane (**5af**):

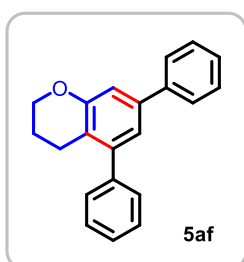

Following the *General Procedure*, to the mixture of 5-hexyn-1-ol (**2a**) (0.1 g, 1.01 mmol) and (*E*)-chalcone (**4f**) (0.105 g, 0.505 mmol) in anhydrous PhF (2 mL) was added AgOTf (0.012 g, 0.05 mmol) under argon atmosphere at room temperature and reaction mixture was stirred for 6h at rt. Purification of the crude product by column chromatography (SiO<sub>2</sub>, 1% EtOAc/hexanes) afforded 5,7-diphenylchromane (**5af**) (0.111 g, 77%). TLC:  $R_f$  = 0.90 (SiO<sub>2</sub>, 10% EtOAc/hexanes); <sup>1</sup>H NMR (CDCl<sub>3</sub>, 500 MHz):  $\delta$  7.62 (d,  $J$  = 7.63 Hz, 2H), 7.48-7.32 (m, 8H), 7.10 (d,  $J$  = 4.20 Hz, 2H), 4.33-4.20 (m, 2H), 2.68 (t,  $J$  = 6.10 Hz, 2H), 2.03-1.90 (m, 2H); <sup>13</sup>C NMR (CDCl<sub>3</sub>, 126 MHz):  $\delta$  155.2, 143.3, 141.1, 140.6, 140.0, 129.1, 128.7, 128.1, 127.2, 127.1, 127.0, 120.6, 119.2, 114.3, 66.3, 24.0, 22.5; HRMS (ESI)  $m/z$  calcd for C<sub>21</sub>H<sub>19</sub>O [M+H]<sup>+</sup> 287.1430 found 287.1430.

### 5-(2-Bromophenyl)-7-phenylchromane (**5ag**):

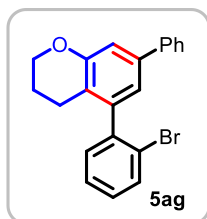

Following the *General Procedure*, to the mixture of 5-hexyn-1-ol (**2a**) (0.1 g, 1.01 mmol) and (*E*)-3-(2-bromophenyl)-1-phenylprop-2-en-1-one (**4g**) (0.144 g, 0.505 mmol) in anhydrous PhF (2 mL) was added AgOTf (0.012 g, 0.05 mmol) under argon atmosphere at room temperature and reaction mixture was stirred for 6h at rt. Purification of the crude product by column chromatography (SiO<sub>2</sub>, 1% EtOAc/hexanes) afforded 5-(2-bromophenyl)-7-phenylchromane (**5ag**) (0.126 g, 69%). TLC:  $R_f$  = 0.90 (SiO<sub>2</sub>, 10% EtOAc/hexanes); <sup>1</sup>H NMR (CDCl<sub>3</sub>, 400 MHz):  $\delta$  7.69 (dd,  $J$  = 8.0, 1.0 Hz, 1H), 7.66-7.60 (m, 2H), 7.46-7.21 (m, 6H), 7.14 (d,  $J$  = 1.88 Hz, 1H), 6.99 (d,  $J$  = 1.88 Hz, 1H), 4.26-4.23 (m, 2H), 2.60-2.52 (m, 1H), 2.43-2.36 (m, 1H), 2.02-1.97 (m, 2H); <sup>13</sup>C NMR (CDCl<sub>3</sub>, 101 MHz):  $\delta$  155.1, 142.3, 141.8, 140.5, 139.7, 132.6, 130.8, 128.9,

128.7, 127.2 (2C), 126.9, 123.6, 120.0, 119.8, 114.7, 66.3, 23.0, 22.3; IR (KBr,  $\text{cm}^{-1}$ ):  $\nu$  3018, 2952, 2880, 1612, 1603, 1583, 1566, 1479, 1216, 1177, 1053, 1009, 772, 669.

### 5-(Naphthalen-1-yl)-7-phenylchromane (5ah):

Following the *General Procedure*, to the mixture of 5-hexyn-1-ol (**2a**) (0.1 g, 1.01 mmol) and (*E*)-3-(naphthalen-1-yl)-1-phenylprop-2-en-1-one (**4h**) (0.130 g, 0.505 mmol) in anhydrous PhF (2 mL) was added AgOTf (0.012g, 0.05 mmol) under argon atmosphere at room temperature and reaction mixture was stirred for 6h at rt. Purification of the crude product by

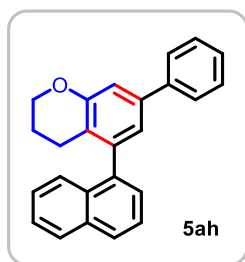

column chromatography ( $\text{SiO}_2$ , 1% EtOAc/hexanes) afforded 5-(naphthalen-1-yl)-7-phenylchromane (**5ah**) (0.127 g, 75%). TLC:  $R_f$  = 0.90 ( $\text{SiO}_2$ , 10% EtOAc/hexanes);  $^1\text{H}$  NMR ( $\text{CDCl}_3$ , 400 MHz):  $\delta$  7.91-7.83 (m, 2H), 7.60 (d,  $J$  = 7.25 Hz, 3H), 7.54-7.44 (m, 2H), 7.42-7.35 (m, 4H), 7.32-7.28 (m, 1H), 7.23 (s, 1H), 7.13 (dd,  $J$  = 1.75, 22.3 Hz, 2H) 4.24-4.18 (m, 2H), 2.44-2.34 (m, 1H), 2.32-2.22 (m, 1H), 1.91-

1.82 (m, 2H);  $^{13}\text{C}$  NMR ( $\text{CDCl}_3$ , 101 MHz):  $\delta$  155.2, 141.5, 140.6, 139.7, 138.8, 133.5, 131.9, 128.7, 128.2, 127.6, 127.2, 126.9, 126.5, 126.1, 126.0, 125.8, 125.4, 121.2, 120.6, 114.4, 66.4, 23.1, 22.3; HRMS (ESI)  $m/z$  calcd for  $\text{C}_{25}\text{H}_{21}\text{O}$   $[\text{M}+\text{H}]^+$  337.1587 found 337.1587.

### 7-Phenyl-5-(pyren-4-yl)chromane(5ai):

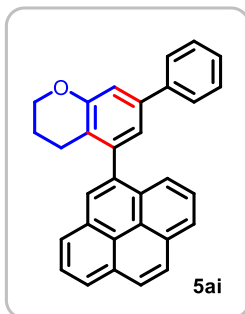

Following the *General Procedure*, to the mixture of 5-hexyn-1-ol (**2a**) (0.1 g, 1.01 mmol) and (*E*)-1-phenyl-3-(pyren-4-yl)prop-2-en-1-one (**4i**) (0.167 g, 0.505 mmol) in anhydrous PhF (2 mL) was added AgOTf (0.012 g, 0.05 mmol) under argon atmosphere at room temperature and reaction mixture was stirred for 8 h at rt. Purification of the crude product by column chromatography ( $\text{SiO}_2$ , 1% EtOAc/hexanes) afforded 7-Phenyl-5-(pyren-4-yl)chromane (**5ai**) (0.136 g, 66%). TLC:  $R_f$  = 0.9

( $\text{SiO}_2$ , 10% EtOAc/hexanes);  $^1\text{H}$  NMR ( $\text{CDCl}_3$ , 400 MHz):  $\delta$  8.28-8.16 (m, 4H), 8.13 (d,  $J$  = 0.9 Hz, 2H), 8.07-8.00 (m, 3H), 7.95 (d,  $J$  = 7.7 Hz, 1H), 7.89 (d,  $J$  = 9.3 Hz, 1H), 7.71-7.65 (m, 2H), 7.47-7.40 (m, 2H), 7.35-7.28 (m, 1H), 4.26-4.22 (m, 2H), 2.41-2.36 (m, 2H), 1.93-1.87 (m, 2H);  $^{13}\text{C}$  NMR ( $\text{CDCl}_3$ , 101 MHz):  $\delta$  155.3, 142.0, 140.6, 139.8, 136.3, 131.4, 131.0, 130.6, 128.9, 128.7, 128.3, 127.6, 127.4, 127.3, 127.2, 127.0, 126.0, 125.8, 125.3, 125.2, 125.1, 125.0, 124.8, 124.7, 124.5, 121.5, 120.8, 114.5, 66.4, 23.4, 22.3; HRMS (ESI):  $m/z$  calcd for  $\text{C}_{31}\text{H}_{23}\text{O}$   $[\text{M}+\text{H}]^+$  411. 1743, found 411.1741.

**5-(4-Methoxyphenyl)-7-phenylchromane (5aj):**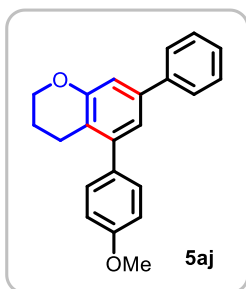

Following the *General Procedure*, to the mixture of 5-hexyn-1-ol (**2a**) (0.1 g, 1.01 mmol) and (*E*)-3-(4-methoxyphenyl)-1-phenylprop-2-en-1-one (**4j**) (0.120 g, 0.505 mmol) in anhydrous PhF (2 mL) was added AgOTf (0.012 g, 0.05 mmol) under argon atmosphere at room temperature and reaction mixture was stirred for 6 h at rt. Purification of the crude product by column chromatography (SiO<sub>2</sub>, 1% EtOAc/hexanes) afforded 5-(4-methoxyphenyl)-7-phenylchromane (**5aj**) (0.116 g, 73%). TLC:  $R_f = 0.90$  (SiO<sub>2</sub>, 10% EtOAc/hexanes); <sup>1</sup>H NMR (CDCl<sub>3</sub>, 400 MHz):  $\delta$  7.63-7.60 (m, 2H), 7.45-7.40 (m, 2H), 7.36-7.30 (m, 3H), 7.08 (s, 2H), 7.01-6.96 (m, 2H), 4.27-4.23 (m, 2H), 3.87 (s, 3H), 2.71-2.65 (m, 2H), 2.01-1.93 (m, 2H); <sup>13</sup>C NMR (CDCl<sub>3</sub>, 101 MHz):  $\delta$  158.7, 155.2, 143.0, 140.7, 139.9, 133.5, 130.2, 128.7, 127.2, 127.0, 120.7, 119.3, 114.1, 113.5, 66.3, 55.3, 24.1, 22.5; HRMS (ESI)  $m/z$  calcd for C<sub>22</sub>H<sub>21</sub>O<sub>2</sub> [M+H]<sup>+</sup> 317.1536, found 317.1530.

**5-(2,6-Dimethoxyphenyl)-7-phenylchromane (5ak):**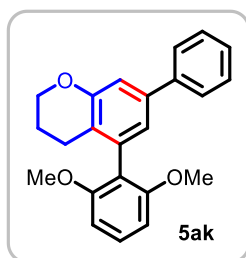

Following the *General Procedure*, to the mixture of 5-hexyn-1-ol (**2a**) (0.1 g, 1.01 mmol) and (*E*)-3-(2,6-dimethoxyphenyl)-1-phenylprop-2-en-1-one (**4k**) (0.135 g, 0.505 mmol) in anhydrous PhF (2 mL) was added AgOTf (0.012 g, 0.05 mmol) under argon atmosphere at room temperature and reaction mixture was stirred for 6 h at rt. Purification of the crude product by column chromatography (SiO<sub>2</sub>, 1% EtOAc/hexanes) afforded 5-(2,6-dimethoxyphenyl)-7-phenylchromane (**5ak**) (0.149 g, 85%). TLC:  $R_f = 0.70$  (SiO<sub>2</sub>, 10% EtOAc/hexanes); <sup>1</sup>H NMR (CDCl<sub>3</sub>, 500 MHz):  $\delta$  7.63-7.60 (m, 2H), 7.42-7.37 (m, 2H), 7.34-7.29 (m, 2H), 7.08 (d,  $J = 1.53$  Hz, 1H), 7.00 (d,  $J = 1.91$  Hz, 1H), 6.67 (d,  $J = 8.4$  Hz, 2H), 4.26-4.19 (m, 2H), 3.75 (s, 6H), 2.46 (t,  $J = 6.49$  Hz, 2H), 2.01-1.93 (m, 2H); <sup>13</sup>C NMR (CDCl<sub>3</sub>, 126 MHz):  $\delta$  157.8, 155.0, 141.1, 139.2, 135.5, 128.8, 128.5, 127.0, 126.8, 121.7, 121.3, 118.0, 114.3, 104.0, 66.3, 55.9, 22.6, 22.4; HRMS (ESI)  $m/z$  calcd for C<sub>23</sub>H<sub>23</sub>O<sub>3</sub> [M+H]<sup>+</sup> 347.1642, found 347.1645.

**5-(Benzo[d][1,3]dioxol-4-yl)-7-phenylchromane (5al):**

Following the *General Procedure*, to the mixture of 5-hexyn-1-ol (**2a**) (0.1 g, 1.01 mmol) and (*E*)-3-(benzo[d][1,3]dioxol-4-yl)-1-phenylprop-2-en-1-one (**4l**) (0.127 g, 0.505 mmol) in anhydrous PhF (2 mL) was added AgOTf (0.012 g, 0.05 mmol) under argon atmosphere at



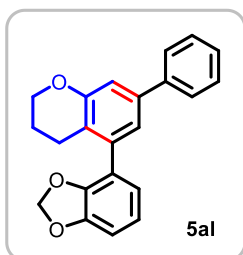

room temperature and reaction mixture was stirred for 6 h at rt. Purification of the crude product by column chromatography (SiO<sub>2</sub>, 1% EtOAc/hexanes) afforded 5-(benzo[d][1,3]dioxol-4-yl)-7-phenylchromane (**5al**) (0.117 g, 70%). TLC:  $R_f$  = 0.90 (SiO<sub>2</sub>, 10% EtOAc/hexanes); <sup>1</sup>H NMR (CDCl<sub>3</sub>, 400 MHz):  $\delta$  7.65-7.56 (m, 2H), 7.47-7.40 (m, 2H), 7.35-7.32 (m, 1H), 7.10-7.03 (m, 2H), 6.90-6.86 (m, 2H), 6.85-6.81 (m, 1H), 6.02 (s, 2H), 4.24 (t,  $J$  = 5.04 Hz, 2H), 2.68 (t,  $J$  = 6.41 Hz, 2H), 2.02-1.91 (m, 2H); <sup>13</sup>C NMR (CDCl<sub>3</sub>, 101 MHz):  $\delta$  155.3, 147.3, 146.7, 142.9, 140.6, 139.9, 134.9, 128.7, 127.2, 127.0, 122.5, 120.6, 119.3, 114.3, 109.7, 108.1, 101.1, 66.3, 24.1, 22.5; HRMS (ESI)  $m/z$  calcd for C<sub>22</sub>H<sub>19</sub>O<sub>3</sub> [M+H]<sup>+</sup> 331.1329, found 331.1337.

#### 4-(7-Phenylchroman-5-yl)phenol(**5am**):

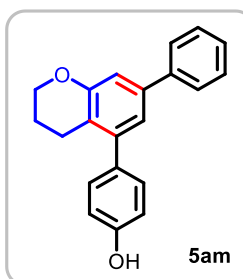

Following the *General Procedure*, to the mixture of 5-hexyn-1-ol (**2a**) (0.1 g, 1.01 mmol) and (*E*)-3-(4-(hydroxy)phenyl)-1-phenylprop-2-en-1-one (**4m**) (0.113 g, 0.505 mmol) in anhydrous PhF (2 mL) was added AgOTf (0.012 g, 0.05 mmol) under argon atmosphere at room temperature and reaction mixture was stirred for 6 h at rt. Purification of the crude product by column chromatography (SiO<sub>2</sub>, 2% EtOAc/hexanes) afforded 4-(7-Phenylchroman-5-yl)phenol (**5am**) (0.124 g, 81%). TLC:  $R_f$  = 0.7 (SiO<sub>2</sub>, 10% EtOAc/hexanes); <sup>1</sup>H NMR (CDCl<sub>3</sub>, 500 MHz):  $\delta$  7.63-7.58 (m, 2H), 7.45-7.39 (m, 2H), 7.36-7.31 (m, 1H), 7.28-7.23 (m, 2H), 7.08 (dd,  $J$  = 8.4, 1.9 Hz, 2H), 6.92-6.88 (m, 2H), 5.36 (br. s, 1H), 4.25 (t,  $J$  = 5.0 Hz, 2H), 2.73-2.67 (m, 2H), 1.99-1.93 (m, 2H); <sup>13</sup>C NMR (CDCl<sub>3</sub>, 126 MHz):  $\delta$  155.1, 154.7, 142.9, 140.6, 139.9, 133.5, 130.4, 128.7, 127.2, 126.9, 120.7, 119.3, 115.0, 114.0, 66.3, 24.1, 22.5; IR (KBr, cm<sup>-1</sup>):  $\nu$  3019, 2953, 2881, 1611, 1563, 1515, 1424, 1347, 1321, 1257, 1215, 1173, 1048, 1009, 869, 835, 760, 699, 669; HRMS (ESI)  $m/z$  calcd for C<sub>21</sub>H<sub>19</sub>O<sub>2</sub> [M+H]<sup>+</sup> 303.1380, found 303.1379.

#### 5-(4-(Benzyloxy)phenyl)-7-phenylchromane(**5an**):

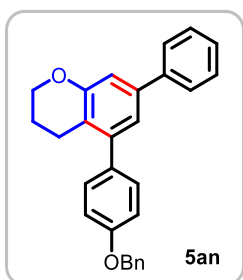

Following the *General Procedure*, to the mixture of 5-hexyn-1-ol (**2a**) (0.1 g, 1.01 mmol) and (*E*)-3-(4-(benzyloxy)phenyl)-1-phenylprop-2-en-1-one (**4n**) (0.158 g, 0.505 mmol) in anhydrous PhF (2 mL) was added AgOTf (0.012 g, 0.05 mmol) under argon atmosphere at room temperature and reaction mixture was stirred for 6 h at rt. Purification of the crude product by column chromatography (SiO<sub>2</sub>, 2%



EtOAc/hexanes) afforded 5-(4-(benzyloxy)phenyl)-7-phenylchromane (**5an**) (0.140 g, 70%). TLC:  $R_f = 0.7$  (SiO<sub>2</sub>, 10% EtOAc/hexanes); <sup>1</sup>H NMR (CDCl<sub>3</sub>, 400 MHz):  $\delta$  7.63-7.59 (m, 2H), 7.50-7.46 (m, 2H), 7.45-7.39 (m, 4H), 7.38-7.30 (m, 4H), 7.08-7.03 (m, 4H), 5.13 (s, 2H), 4.27-4.23 (m, 2H), 2.68 (t,  $J = 6.4$  Hz, 2H), 2.00-1.93 (m, 2H); <sup>13</sup>C NMR (CDCl<sub>3</sub>, 101 MHz):  $\delta$  158.0, 155.2, 142.9, 140.7, 139.9, 137.0, 133.7, 130.2, 128.7, 128.6, 128.0, 127.5, 127.2, 127.0, 120.7, 119.3, 114.4, 114.1, 70.1, 66.3, 24.1, 22.5; IR (KBr, cm<sup>-1</sup>):  $\nu$  3019, 2935, 1608, 1563, 1512, 1401, 1347, 1287, 1218, 1176, 1141, 1076, 1018, 929, 903, 868, 772, 697, 669; HRMS (ESI)  $m/z$  calcd for C<sub>28</sub>H<sub>25</sub>O<sub>2</sub> [M+H]<sup>+</sup> 393.1849, found 393.1850.

#### 5-(4-(Allyloxy)phenyl)-7-phenylchromane (**5ao**):

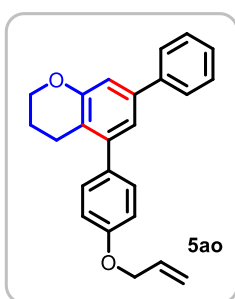

Following the *General Procedure*, to the mixture of 5-hexyn-1-ol (**2a**) (0.1 g, 1.01 mmol) and (*E*)-3-(4-allyloxyphenyl)-1-phenylprop-2-en-1-one (**4o**) (0.133 g, 0.505 mmol) in anhydrous PhF (2 mL) was added AgOTf (0.012 g, 0.05 mmol) under argon atmosphere at room temperature and reaction mixture was stirred for 6 h at rt. Purification of the crude product by column chromatography (SiO<sub>2</sub>, 2% EtOAc/hexanes) afforded 5-(4-(allyloxy)phenyl)-7-phenylchromane (**5ao**) (0.131 g, 76%). TLC:  $R_f = 0.7$  (SiO<sub>2</sub>, 10% EtOAc/hexanes); <sup>1</sup>H NMR (CDCl<sub>3</sub>, 400 MHz):  $\delta$  7.66-7.61 (m, 2H), 7.48-7.41 (m, 2H), 7.38-7.30 (m, 3H), 7.13-7.09 (m, 2H), 7.04-6.98 (m, 2H), 6.19-6.08 (m, 1H), 5.53-5.46 (m, 1H), 5.38-5.33 (m, 1H), 4.64-4.60 (m, 2H), 4.27 (t,  $J = 5.0$  Hz, 2H), 2.70 (t,  $J = 6.4$  Hz, 2H), 2.02-1.94 (m, 2H); <sup>13</sup>C NMR (CDCl<sub>3</sub>, 101 MHz):  $\delta$  157.7, 155.2, 142.9, 140.7, 139.9, 133.6, 133.2, 130.1, 128.6, 127.2, 126.9, 120.6, 119.2, 117.7, 114.3, 114.0, 68.8, 66.2, 24.1, 22.5; IR (KBr, cm<sup>-1</sup>):  $\nu$  3019, 1609, 1563, 1512, 1466, 1424, 1347, 1321, 1286, 1215, 1177, 1076, 929, 834, 760, 669; HRMS (ESI)  $m/z$  calcd for C<sub>24</sub>H<sub>23</sub>O<sub>2</sub> [M+H]<sup>+</sup> 343.1693, found 343.1689.

#### 4-(7-Phenylchroman-5-yl)phenyl 4-methylbenzenesulfonate (**5ap**):

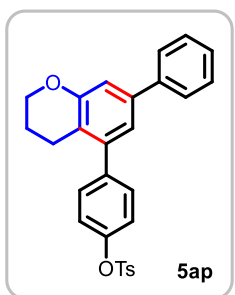

Following the *General Procedure*, to the mixture of 5-hexyn-1-ol (**2a**) (0.1 g, 1.01 mmol) and (*E*)-4-(3-oxo-3-phenylprop-1-en-1-yl)phenyl 4-methylbenzenesulfonate (**4p**) (0.191 g, 0.505 mmol) in anhydrous PhF (2 mL) was add AgOTf(0.012 g, 0.05 mmol) under argon atmosphere at room temperature and reaction mixture was stirred for 6h at rt. Purification of the crude product by column chromatography (SiO<sub>2</sub>, 2% EtOAc/hexanes) afforded 4-(7-phenylchroman-5-yl)phenyl 4-methylbenzenesulfonate (**5ap**)

(0.195 g, 85%). TLC:  $R_f = 0.60$  (SiO<sub>2</sub>, 20% EtOAc/hexanes); <sup>1</sup>H NMR (CDCl<sub>3</sub>, 400 MHz):  $\delta$  7.81-7.76 (m, 2H), 7.60-7.56 (m, 2H), 7.45-7.39 (m, 2H), 7.37-7.33 (m, 3H), 7.32-7.28 (m, 2H), 7.09 (d,  $J = 2.3$  Hz, 1H), 7.07-7.03 (m, 2H), 7.01 (d,  $J = 1.8$  Hz, 1H), 4.24 (t,  $J = 5.0$  Hz, 2H), 2.60 (t,  $J = 6.4$  Hz, 2H), 2.47 (s, 3H), 1.99-1.92 (m, 2H); <sup>13</sup>C NMR (CDCl<sub>3</sub>, 101 MHz):  $\delta$  155.3, 148.7, 145.4, 141.9, 140.4, 140.1, 140.0, 132.5, 130.3, 129.8, 128.7, 128.5, 127.4, 126.9, 122.1, 120.4, 119.0, 114.7, 66.3, 24.0, 22.4, 21.7; HRMS (ESI)  $m/z$  calcd for C<sub>28</sub>H<sub>25</sub>O<sub>4</sub>S [M+H]<sup>+</sup> 457.1468, found 457.1467.

#### 4-(7-Phenylchroman-5-yl)phenylmethanesulfonate (**5aq**):

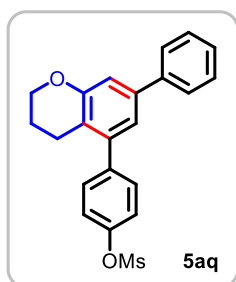

Following the *General Procedure*, to the mixture of 5-hexyn-1-ol (**2a**) (0.1 g, 1.01 mmol) and (*E*)-4-(3-oxo-3-phenylprop-1-en-1-yl)phenyl methanesulfonate (**4q**) (0.152 g, 0.505 mmol) in anhydrous PhF (2 mL) was added AgOTf (0.012 g, 0.05 mmol) under argon atmosphere at room temperature and reaction mixture was stirred for 6 h at rt. Purification of the crude product by column chromatography (SiO<sub>2</sub>, 2% EtOAc/hexanes) afforded 4-(7-phenylchroman-5-yl)phenyl methanesulfonate (**5aq**) (0.167 g, 87%). TLC:  $R_f = 0.60$  (SiO<sub>2</sub>, 20% EtOAc/hexanes); <sup>1</sup>H NMR (CDCl<sub>3</sub>, 400 MHz):  $\delta$  7.62-7.59 (m, 2H), 7.46-7.41 (m, 4H), 7.38-7.34 (m, 3H), 7.12 (d,  $J = 2.3$  Hz, 1H), 7.05 (d,  $J = 1.5$  Hz, 1H), 4.28-4.24 (m, 2H), 3.21 (s, 3H), 2.68-2.63 (m, 2H), 2.08-1.94 (m, 2H); <sup>13</sup>C NMR (CDCl<sub>3</sub>, 101 MHz):  $\delta$  155.3, 148.2, 141.7, 140.4, 140.3, 140.1, 130.7, 128.7, 127.4, 126.9, 121.7, 120.4, 119.0, 114.7, 66.3, 37.4, 24.0, 22.3; IR (KBr, cm<sup>-1</sup>):  $\nu$  3019, 2939, 2877, 1723, 1601, 1583, 1565, 1467, 1412, 1372, 1351, 1321, 1287, 1215, 1149, 1101, 1048, 1011, 969, 929, 903, 871, 849, 758, 669; HRMS (ESI): calcd for C<sub>22</sub>H<sub>21</sub>O<sub>4</sub>S [M+H]<sup>+</sup> 381.1155, found 381.1149.

#### 4-(7-Phenylchroman-5-yl)phenyl acetate (**5ar**):

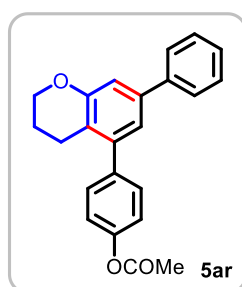

Following the *General Procedure*, to the mixture of 5-hexyn-1-ol (**2a**) (0.1 g, 1.01 mmol) and (*E*)-4-(3-oxo-3-phenylprop-1-en-1-yl)phenyl acetate (**4r**) (0.134 g, 0.505 mmol) in anhydrous PhF (2 mL) was added AgOTf (0.012 g, 0.05 mmol) under argon atmosphere at room temperature and reaction mixture was stirred for 6 h at rt. Purification of the crude product by column chromatography (SiO<sub>2</sub>, 2% EtOAc/hexanes) afforded 4-(7-phenylchroman-5-yl)phenyl acetate (**5ar**) (0.145 g, 83%). TLC:  $R_f = 0.70$  (SiO<sub>2</sub>, 20% EtOAc/hexanes); <sup>1</sup>H NMR (CDCl<sub>3</sub>, 400 MHz):  $\delta$  7.65-7.57 (m,

2H), 7.46-7.38 (m, 4H), 7.37-7.31 (m, 1H), 7.18-7.14 (m, 2H), 7.10 (d,  $J = 1.88$  Hz, 1H), 7.08 (d,  $J = 1.88$  Hz, 1H), 4.28-4.23 (m, 2H), 2.68 (t,  $J = 6.38$  Hz, 2H), 2.35 (s, 3H), 2.01-1.94 (m, 2H);  $^{13}\text{C}$  NMR ( $\text{CDCl}_3$ , 101 MHz):  $\delta$  169.6, 155.3, 149.8, 142.4, 140.5, 140.0, 138.6, 130.1, 128.7, 127.3, 126.9, 121.2, 120.6, 119.2, 114.5, 66.3, 24.0, 22.3, 21.2; HRMS (ESI)  $m/z$  calcd for  $\text{C}_{23}\text{H}_{21}\text{O}_3$   $[\text{M}+\text{H}]^+$  345.1485, found 345.1476.

#### 5-(4-(Methylthio)phenyl)-7-phenylchromane(5as):

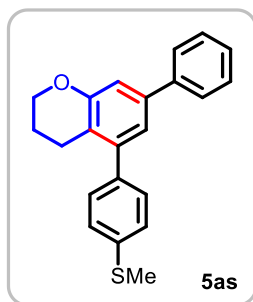

Following the *General Procedure*, to the mixture of 5-hexyn-1-ol (**2a**) (0.1 g, 1.01 mmol) and (*E*)-3-(4-(methylthio)phenyl)-1-phenylprop-2-en-1-one (**4s**) (0.128 g, 0.505 mmol) in anhydrous PhF (2 mL) was added AgOTf (0.012 g, 0.05 mmol) under argon atmosphere at room temperature and reaction mixture was stirred for 6 h at rt. Purification of the crude product by column chromatography ( $\text{SiO}_2$ , 1% EtOAc/hexanes) afforded 5-(4-(methylthio)phenyl)-7-phenylchromane (**5as**) (0.100 g, 60%). TLC:  $R_f = 0.90$  ( $\text{SiO}_2$ , 10% EtOAc/hexanes);  $^1\text{H}$  NMR ( $\text{CDCl}_3$ , 400 MHz):  $\delta$  7.62-7.59 (m, 2H), 7.46-7.39 (m, 2H), 7.37-7.30 (m, 5H), 7.08 (d,  $J = 1.83$  Hz, 1H), 7.06 (d,  $J = 1.83$  Hz, 1H), 4.27-4.23 (m, 2H), 2.68 (t,  $J = 6.41$  Hz, 2H), 2.54 (s, 3H), 2.03-1.89 (m, 2H);  $^{13}\text{C}$  NMR ( $\text{CDCl}_3$ , 101 MHz):  $\delta$  155.3, 142.7, 140.6, 140.1, 137.9, 137.3, 129.6, 128.7, 127.3, 126.9, 126.2, 120.5, 119.2, 114.4, 66.3, 24.1, 22.5, 15.8; HRMS (ESI)  $m/z$  calcd for  $\text{C}_{22}\text{H}_{21}\text{OS}$   $[\text{M}+\text{H}]^+$  333.1308 found 333.1306.

#### 5-(4-Chlorophenyl)-7-phenylchromane (5at):

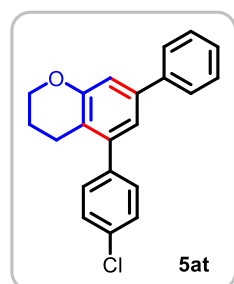

Following the *General Procedure*, to the mixture of 5-hexyn-1-ol (**2a**) (0.1 g, 1.01 mmol) and (*E*)-3-(4-chlorophenyl)-1-phenylprop-2-en-1-one (**4t**) (0.122 g, 0.505 mmol) in anhydrous PhF (2 mL) was added AgOTf (0.012 g, 0.05 mmol) under argon atmosphere at room temperature and reaction mixture was stirred for 6 h at rt. Purification of the crude product by column chromatography ( $\text{SiO}_2$ , 1% EtOAc/hexanes) afforded 5-(4-chlorophenyl)-7-phenylchromane (**5at**) (0.094 g, 58%). TLC:  $R_f = 0.90$  ( $\text{SiO}_2$ , 10% EtOAc/hexanes);  $^1\text{H}$  NMR ( $\text{CDCl}_3$ , 400 MHz):  $\delta$  7.61-7.58 (m, 2H), 7.45-7.39 (m, 4H), 7.36-7.30 (m, 3H), 7.10 (d,  $J = 1.9$  Hz, 1H), 7.03 (d,  $J = 2.0$  Hz, 1H), 4.25 (t,  $J = 5.13$  Hz, 2H), 2.67-2.62 (m, 2H), 2.01-1.93 (m, 2H);  $^{13}\text{C}$  NMR ( $\text{CDCl}_3$ , 126 MHz):  $\delta$  155.3, 142.1, 140.5, 140.1, 139.5, 133.1, 130.4, 128.7, 128.3, 127.3, 126.9, 120.4, 119.0,

114.6, 66.3, 24.0, 22.4; HRMS (ESI)  $m/z$  calcd for  $C_{21}H_{18}OCl$   $[M+H]^+$  321.1041, found 321.1039.

### 7-Phenyl-5-(4-(trifluoromethyl)phenyl)chromane(5au):

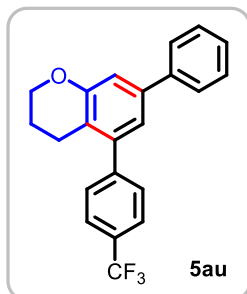

Following the *General Procedure*, to the mixture of 5-hexyn-1-ol (**2a**) (0.1 g, 1.01 mmol) and (*E*)-1-phenyl-3-(4-(trifluoromethyl)phenyl)prop-2-en-1-one (**4u**) (0.139 g, 0.505 mmol) in anhydrous PhF (2 mL) was added AgOTf (0.012 g, 0.05 mmol) under argon atmosphere at room temperature and reaction mixture was stirred for 6 h at rt. Purification of the crude product by column chromatography ( $SiO_2$ , 1% EtOAc/hexanes) afforded 7-phenyl-5-(4-(trifluoromethyl)phenyl)chromane (**5au**) (0.178 g, 69%). TLC:  $R_f$  = 0.90 ( $SiO_2$ , 10% EtOAc/hexanes);  $^1H$  NMR ( $CDCl_3$ , 400 MHz):  $\delta$  7.70 (d,  $J$  = 8.1 Hz, 2H), 7.63-7.58 (m, 2H), 7.51 (d,  $J$  = 8.0 Hz, 2H), 7.47-7.40 (m, 2H), 7.38-7.32 (m, 1H), 7.13 (d,  $J$  = 1.75 Hz, 1H), 7.05 (d,  $J$  = 1.9 Hz, 1H), 4.30-4.24 (m, 2H), 2.64 (t,  $J$  = 6.5 Hz, 2H), 2.02-1.94 (m, 2H);  $^{13}C$  NMR ( $CDCl_3$ , 101 MHz):  $\delta$  155.4, 144.8, 141.9, 140.4, 140.3, 129.5, 128.8, 127.4, 126.9, 125.2, 125.1 (2C), 125.0, 120.3, 118.9, 115.0, 66.3, 23.9, 22.3; HRMS (ESI)  $m/z$  calcd for  $C_{22}H_{18}OF_3$   $[M+H]^+$  355.1304, found 355.1304.

### 7-Phenyl-5-(ferrocenyl)chromane (5av):

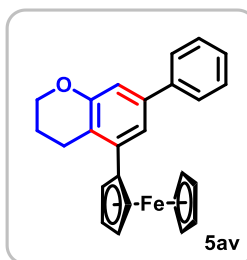

Following the *General Procedure*, to the mixture of 5-hexyn-1-ol (**2a**) (0.1 g, 1.01 mmol) and (*E*)-3-(ferrocene)-1-phenylprop-2-en-1-one (**4v**) (0.156 g, 0.505 mmol) in anhydrous PhF (2 mL) was added AgOTf (0.012 g, 0.05 mmol) under argon atmosphere at room temperature and reaction mixture was stirred for 6 h at rt. Purification of the crude product by column chromatography ( $SiO_2$ , 1% EtOAc/hexanes) afforded 7-phenyl-5-(ferrocenyl)chromane (**5av**) (0.134 g, 67%). TLC:  $R_f$  = 0.90 ( $SiO_2$ , 10% EtOAc/hexanes);  $^1H$  NMR ( $CDCl_3$ , 400 MHz):  $\delta$  7.66-7.63 (m, 2H), 7.61 (d,  $J$  = 2.3 Hz, 1H), 7.50-7.45 (m, 2H), 7.40-7.34 (m, 1H), 6.97 (d,  $J$  = 1.5 Hz, 1H), 4.49-4.48 (m, 2H), 4.32-4.30 (m, 2H), 4.24-4.21 (m, 2H), 4.19 (s, 5H), 2.83-2.78 (m, 2H), 2.00-1.94 (m, 2H);  $^{13}C$  NMR ( $CDCl_3$ , 101 MHz):  $\delta$  155.0, 141.0, 139.5, 139.1, 128.8, 127.2, 126.9, 121.7, 119.9, 113.5, 87.1, 70.2, 69.6, 67.8, 66.1, 24.4, 22.6; HRMS (ESI)  $m/z$  calcd for  $C_{25}H_{23}OFe$   $[M+H]^+$  395.1093, found 395.1066.

**5-(Anthracen-9-yl)-7-(*p*-tolyl)chromane(5aw):**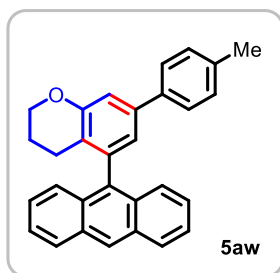

Following the *General Procedure*, to the mixture of 5-hexyn-1-ol (**2a**) (0.1 g, 1.01 mmol) and (*E*)-3-(anthracen-9-yl)-1-(*p*-tolyl)prop-2-en-1-one (**4w**) (0.162 g, 0.505 mmol) in anhydrous PhF (2 mL) was added AgOTf (0.012 g, 0.05 mmol) under argon atmosphere at room temperature and reaction mixture was stirred for 6h at rt. Purification of the crude product by column chromatography (SiO<sub>2</sub>,

1% EtOAc/hexanes) afforded 5-(anthracen-9-yl)-7-(*p*-tolyl)chromane (**5aw**) (0.142 g, 71%). TLC:  $R_f = 0.90$  (SiO<sub>2</sub>, 10% EtOAc/hexanes); <sup>1</sup>H NMR (CDCl<sub>3</sub>, 400 MHz):  $\delta$  8.52 (s, 1H), 8.08 (d,  $J = 8.39$  Hz, 2H), 7.69 (d,  $J = 8.39$  Hz, 2H), 7.55 (d,  $J = 8.39$  Hz, 2H), 7.51-7.46 (m, 2H), 7.42-7.34 (m, 2H), 7.28-7.27 (m, 1H), 7.21 (d,  $J = 8.39$  Hz, 2H), 7.15 (d,  $J = 1.53$  Hz, 1H), 4.24 (t,  $J = 5.34$  Hz, 2H), 2.37 (s, 3H), 2.16-2.11 (m, 2H), 1.88-1.80 (m, 2H); <sup>13</sup>C NMR (CDCl<sub>3</sub>, 101 MHz):  $\delta$  155.5, 139.8, 139.4, 137.6, 137.0, 135.5, 131.4, 129.9, 129.4, 128.5, 126.7, 126.5, 125.6, 125.2, 121.8, 121.3, 114.3, 66.4, 22.5, 22.3, 21.1; HRMS (ESI)  $m/z$  calcd for C<sub>30</sub>H<sub>25</sub>O [M+H]<sup>+</sup> 401.1900 found 401.1899.

**7-(4-Methoxyphenyl)-5-phenylchromane (5ax):**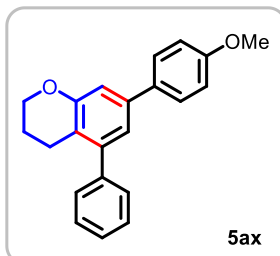

Following the *General Procedure*, to the mixture of 5-hexyn-1-ol (**2a**) (0.1 g, 1.01 mmol) and (*E*)-1-(4-methoxyphenyl)-3-phenylprop-2-en-1-one (**4x**) (0.120 g, 0.505 mmol) in anhydrous PhF (2 mL) was added AgOTf (0.012 g, 0.05 mmol) under argon atmosphere at room temperature and reaction mixture was stirred for 6h at rt. Purification of the crude product by column chromatography (SiO<sub>2</sub>,

1% EtOAc/hexanes) afforded 7-(4-methoxyphenyl)-5-phenylchromane (**5ax**) (0.126 g, 79%). TLC:  $R_f = 0.80$  (SiO<sub>2</sub>, 10% EtOAc/hexanes); <sup>1</sup>H NMR (CDCl<sub>3</sub>, 400 MHz):  $\delta$  7.60-7.51 (m, 2H), 7.48-7.33 (m, 5H), 7.06-7.04 (m, 2H), 6.99-6.91 (m, 2H), 4.25 (t,  $J = 5.34$  Hz, 2H), 3.85 (s, 3H), 2.69-2.64 (m, 2H), 2.01-1.92 (m, 2H); <sup>13</sup>C NMR (CDCl<sub>3</sub>, 101 MHz):  $\delta$  159.1, 155.2, 143.3, 141.2, 139.6, 133.2, 129.1, 128.1, 127.9, 127.0, 120.2, 118.5, 114.1, 113.8, 66.3, 55.3, 24.0, 22.5; HRMS (ESI)  $m/z$  calcd for C<sub>22</sub>H<sub>21</sub>O<sub>2</sub> [M+H]<sup>+</sup> 317.1536, found 317.1531.

**5-(4-Bromophenyl)-7-(4-methoxyphenyl)chromane (5ay):**

Following the *General Procedure*, to the mixture of 5-hexyn-1-ol (**2a**) (0.1 g, 1.01 mmol) and (*E*)-3-(4-bromophenyl)-1-(4-methoxyphenyl)prop-2-en-1-one (**4y**) (0.160 g, 0.505 mmol) in anhydrous PhF (2 mL) was added AgOTf (0.012 g, 0.05 mmol) under argon atmosphere at

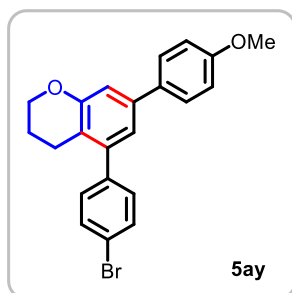

room temperature and reaction mixture was stirred for 6 h at rt. Purification of the crude product by column chromatography (SiO<sub>2</sub>, 1% EtOAc/hexanes) afforded 5-(4-bromophenyl)-7-(4-methoxyphenyl)chromane (**5ay**) (0.135 g, 67%). TLC:  $R_f$  = 0.80 (SiO<sub>2</sub>, 10% EtOAc/hexanes); <sup>1</sup>H NMR (CDCl<sub>3</sub>, 400 MHz):  $\delta$  7.76-7.73 (m, 1H), 7.54-7.50 (m, 1H), 7.47-7.43 (m, 1H), 7.32-7.25 (m, 3H), 7.03-7.00 (m, 2H), 6.99-6.95 (m, 2H), 4.25 (t,  $J$  = 5.13 Hz, 2H), 3.87 (s, 3H), 2.68 (t,  $J$  = 6.50 Hz, 2H), 2.00-1.92 (m, 2H); <sup>13</sup>C NMR (CDCl<sub>3</sub>, 101 MHz):  $\delta$  158.8, 155.4, 143.2, 142.9, 138.3, 133.2, 130.2 (2C), 130.1, 130.0, 125.5, 122.8, 120.5, 120., 114.0, 113.6, 66.3, 55.3, 24.1, 22.4; HRMS (ESI)  $m/z$  calcd for C<sub>22</sub>H<sub>20</sub>O<sub>2</sub>Br [M+H]<sup>+</sup> 395.0641, found 395.0645.

#### 7-(4-Nitrophenyl)-5-(*p*-tolyl)chromane (**5az**):

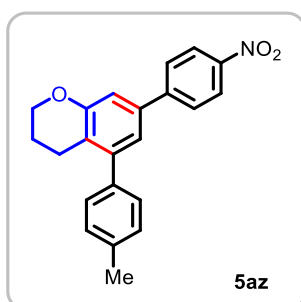

Following the *General Procedure*, to the mixture of 5-hexyn-1-ol (**2a**) (0.1 g, 1.01 mmol) and (*E*)-1-(4-nitrophenyl)-3-(*p*-tolyl)prop-2-en-1-one (**4z**) (0.134 g, 0.505 mmol) in anhydrous PhF (2 mL) was added AgOTf (0.012 g, 0.05 mmol) under argon atmosphere at room temperature and reaction mixture was stirred for 6 h at rt. Purification of the crude product by column chromatography (SiO<sub>2</sub>, 2% EtOAc/hexanes) afforded 7-(4-nitrophenyl)-5-(*p*-tolyl)chromane (**5az**) (0.120 g, 69%). TLC:  $R_f$  = 0.70 (SiO<sub>2</sub>, 20% EtOAc/hexanes); <sup>1</sup>H NMR (CDCl<sub>3</sub>, 400 MHz):  $\delta$  7.52-7.47 (m, 2H), 7.36-7.30 (m, 2H), 7.23 (d,  $J$  = 7.9 Hz, 2H), 7.15-7.08 (m, 2H), 7.05 (dd,  $J$  = 19.4, 1.9 Hz, 2H), 4.24 (t,  $J$  = 5.1 Hz, 2H), 2.63 (t,  $J$  = 6.4 Hz, 2H), 2.39 (s, 3H), 2.00-1.92 (m, 2H); <sup>13</sup>C NMR (CDCl<sub>3</sub>, 101 MHz):  $\delta$  163.3, 160.8, (unidentified aromatic impurity) 155.3, 142.2, 140.0, 137.6, 137.1, 137.0, 130.7, 130.6, 129.4, 126.8, 120.4, 118.9, 115.1, 114.9, 114.2, 66.3, 29.7 (grease), 24.0, 22.5, 21.1.

#### 5-(4-Methoxyphenyl)-7-(naphthalen-1-yl)chromane (**5aa'**):

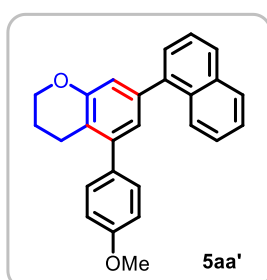

Following the *General Procedure*, to the mixture of 5-hexyn-1-ol (**2a**) (0.1 g, 1.01 mmol) and (*E*)-3-(4-methoxyphenyl)-1-(naphthalen-1-yl)prop-2-en-1-one (**4a'**) (0.145 g, 0.505 mmol) in anhydrous PhF (2 mL) was added AgOTf (0.012 g, 0.05 mmol) under argon atmosphere at room temperature and reaction mixture was stirred for 6 h at rt. Purification of the crude product by column chromatography (SiO<sub>2</sub>, 1% EtOAc/hexanes) afforded 5-(4-methoxyphenyl)-7-(naphthalen-1-yl)chromane (**5aa'**)



(0.155 g, 84%). TLC:  $R_f$  = 0.80 (SiO<sub>2</sub>, 10% EtOAc/hexanes); <sup>1</sup>H NMR (CDCl<sub>3</sub>, 400 MHz):  $\delta$  8.11-8.09 (m, 1H), 7.93-7.88 (m, 1H), 7.85 (d,  $J$  = 7.79 Hz, 1H), 7.54-7.43 (m, 4H), 7.37-7.32 (m, 2H), 7.02-6.93 (m, 4H), 4.31-4.27 (m, 2H), 3.86 (s, 3H), 2.76 (t,  $J$  = 6.41 Hz, 2H), 2.08-1.96 (m, 2H); <sup>13</sup>C NMR (CDCl<sub>3</sub>, 101 MHz):  $\delta$  158.7, 154.8, 142.4, 139.8, 139.4, 133.8, 133.3, 131.5, 130.3, 128.2, 127.5, 126.8, 126.2, 125.9, 125.7, 125.4, 123.7, 119.1, 117.1, 113.5, 66.3, 55.3, 24.3, 22.6; HRMS (ESI)  $m/z$  calcd for C<sub>26</sub>H<sub>23</sub>O<sub>2</sub> [M+H]<sup>+</sup> 367.1693, found 367.1696.

#### 5-(4-Methoxyphenyl)-7-phenylspiro[chromane-3,1'-cyclohexane] (**5bj**):

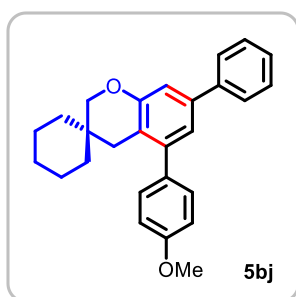

Following the *General Procedure*, to the mixture of (1-(but-3-yn-1-yl)cyclohexyl)methanol (**2b**) (0.1 g, 0.60 mmol) and (*E*)-3-(4-methoxyphenyl)-1-phenylprop-2-en-1-one (**4j**) (0.071 g, 0.30 mmol) in anhydrous PhF (2 mL) was added AgOTf (0.007 g, 0.03 mmol) under argon atmosphere at room temperature and reaction mixture was stirred for 6 h at rt. Purification of the crude product by column chromatography (SiO<sub>2</sub>, 1% EtOAc/hexanes) afforded 5-(4-methoxyphenyl)-7-phenylspiro[chromane-3,1'-cyclohexane] (**5bj**) (0.088 g, 77%). TLC:  $R_f$  = 0.90 (SiO<sub>2</sub>, 10% EtOAc/hexanes); <sup>1</sup>H NMR (CDCl<sub>3</sub>, 400 MHz):  $\delta$  7.63-7.62 (m, 1H), 7.61-7.59 (m, 1H), 7.46-7.39 (m, 2H), 7.36-7.29 (m, 3H), 7.10-7.06 (m, 2H), 7.01-6.99 (m, 1H), 6.99-6.98 (m, 1H), 3.94 (s, 2H), 3.89 (s, 3H), 2.50 (s, 2H), 1.49-1.34 (m, 10H); <sup>13</sup>C NMR (CDCl<sub>3</sub>, 101 MHz):  $\delta$  158.6, 154.4, 143.2, 140.7, 133.5, 130.2, 128.7, 127.2, 126.9, 121.0, 118.2, 113.5 (2C), 73.3, 55.3, 33.2, 31.2, 26.4, 21.5; IR (KBr, cm<sup>-1</sup>):  $\nu$  3019, 2932, 2855, 1609, 1563, 1514, 1466, 1341, 1215, 1150, 929, 869, 767, 669; HRMS (ESI)  $m/z$  calcd for C<sub>27</sub>H<sub>29</sub>O<sub>2</sub> [M+H]<sup>+</sup> 385.2162, found 385.2168.

#### 5-(4-Ethylphenyl)-7-phenylspiro[chromane-3,1'-cyclohexane] (**5bb'**):

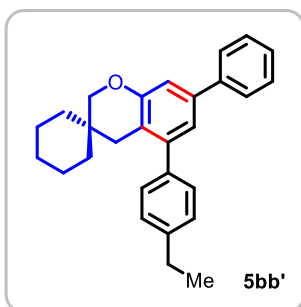

Following the *General Procedure*, to the mixture of (1-(but-3-yn-1-yl)cyclohexyl)methanol (**2b**) (0.1 g, 0.60 mmol) and (*E*)-3-(4-ethylphenyl)-1-phenylprop-2-en-1-one (**4b'**) (0.070 g, 0.30 mmol) in anhydrous PhF (2 mL) was added AgOTf (0.007 g, 0.030 mmol) under argon atmosphere at room temperature and reaction mixture was stirred for 6 h at rt. Purification of the crude product by column chromatography (SiO<sub>2</sub>, 1% EtOAc/hexanes) afforded 5-(4-ethylphenyl)-7-phenylspiro[chromane-3,1'-cyclohexane] (**5bb'**) (0.075 g, 66%). TLC:  $R_f$  = 0.90 (SiO<sub>2</sub>, 10%

EtOAc/hexanes);  $^1\text{H NMR}$  ( $\text{CDCl}_3$ , 400 MHz):  $\delta$  7.61-7.57 (m, 2H), 7.42-7.36 (m, 2H), 7.33-7.25 (m, 5H), 7.08-7.05 (m, 2H), 3.93 (s, 2H), 2.72 (q,  $J = 7.63$  Hz, 15.26 Hz, 2H), 2.48 (s, 2H), 1.51-1.34 (m, 9H), 1.33-1.28 (m, 4H);  $^{13}\text{C NMR}$  ( $\text{CDCl}_3$ , 101 MHz):  $\delta$  154.4, 143.6, 142.9, 140.7, 139.6, 138.4, 129.0, 128.6, 127.6, 127.1, 126.9, 121.0, 118.1, 113.6, 73.5, 35.9, 33.2, 31.2, 28.6, 26.4, 21.5, 15.4; HRMS (ESI)  $m/z$  calcd for  $\text{C}_{28}\text{H}_{31}\text{O}$   $[\text{M}+\text{H}]^+$  383.2369, found 383.2374.

### 5-(4-Methoxyphenyl)-3,3-dimethyl-7-(naphthalen-1-yl)chromane (**5ca'**):

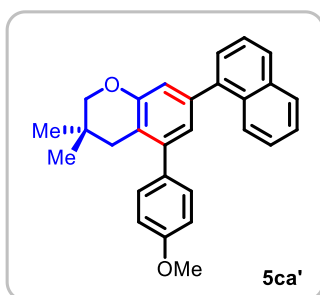

Following the *General Procedure*, to the mixture of 2,2-dimethylhex-5-yn-1-ol (**2c**) (0.1 g, 0.79 mmol) and (*E*)-3-(4-methoxyphenyl)-1-(naphthalen-1-yl)prop-2-en-1-one (**4a'**) (0.112 g, 0.39 mmol) in anhydrous PhF (2 mL) was added AgOTf (0.010 g, 0.039 mmol) under argon atmosphere at room temperature and reaction mixture was stirred for 6 h at rt.

Purification of the crude product by column chromatography ( $\text{SiO}_2$ , 1% EtOAc/hexanes) afforded 5-(4-methoxyphenyl)-3,3-dimethyl-7-(naphthalen-1-yl)chromane (**5ca'**) (0.110 g, 72%). TLC:  $R_f = 0.90$  ( $\text{SiO}_2$ , 10% EtOAc/hexanes);  $^1\text{H NMR}$  ( $\text{CDCl}_3$ , 400 MHz):  $\delta$  8.13 (d,  $J = 8.39$  Hz, 1H), 7.93-7.84 (m, 2H), 7.54-7.46 (m, 4H), 7.37-7.33 (m, 2H), 7.06-6.94 (m, 4H), 3.87 (s, 5H), 2.55 (s, 2H), 1.06 (s, 6H);  $^{13}\text{C NMR}$  ( $\text{CDCl}_3$ , 126 MHz):  $\delta$  158.7, 153.6, 142.6, 139.8, 139.3, 133.8, 133.4, 131.5, 130.3, 129.0, 128.2, 127.5, 126.9, 126.2, 125.9, 125.7, 125.4, 124.1, 118.3, 116.8, 113.9, 113.5, 75.4, 55.3, 38.2, 28.8, 24.9.

### 7-Phenylchromane(**5ac'**):

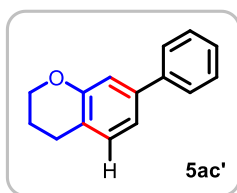

Following the *General Procedure*, to the mixture of 5-hexyn-1-ol (**2a**) (0.1 g, 1.01 mmol) and 1-phenylprop-2-en-1-one (**4c'**) (0.066 g, 0.505 mmol) in anhydrous PhF (2 mL) was added AgOTf (0.012 g, 0.05 mmol) under argon atmosphere at room temperature and reaction

mixture was stirred for 6 h at rt. Purification of the crude product by column chromatography ( $\text{SiO}_2$ , 1% EtOAc/hexanes) afforded 7-phenylchromane (**5ac'**) (0.057 g, 54%). TLC:  $R_f = 0.90$  ( $\text{SiO}_2$ , 10% EtOAc/hexanes);  $^1\text{H NMR}$  ( $\text{CDCl}_3$ , 400 MHz):  $\delta$  7.63-7.57 (m, 2H), 7.48-7.41 (m, 2H), 7.38-7.32 (m, 1H), 7.16-7.10 (m, 2H), 7.09-7.06 (m, 1H), 4.25 (t,  $J = 5.13$  Hz, 2H), 2.85 (t,  $J = 6.5$  Hz, 2H), 2.11-2.02 (m, 2H);  $^{13}\text{C NMR}$  ( $\text{CDCl}_3$ , 101 MHz):  $\delta$  155.1, 140.9, 140.5, 130.1, 128.7, 127.1, 126.9, 121.3, 119.0, 115.2, 66.5, 24.6, 22.4; HRMS (ESI)  $m/z$  calcd for  $\text{C}_{15}\text{H}_{15}\text{O}$   $[\text{M}+\text{H}]^+$  211.1117, found 211.1110.



**7-(4-Nitrophenyl)chromane (5ad')**: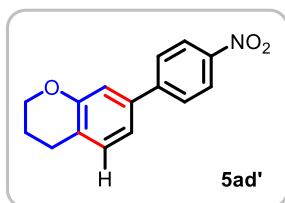

Following the *General Procedure*, to the mixture of 5-hexyn-1-ol (**2a**) (0.1 g, 1.01 mmol) and 1-(4-nitrophenyl)prop-2-en-1-one (**4d'**) (0.089 g, 0.505 mmol) in anhydrous PhF (2 mL) was added AgOTf (0.012 g, 0.05 mmol) under argon atmosphere at room temperature and reaction mixture was stirred for 6 h at rt. Purification of the crude product by column chromatography (SiO<sub>2</sub>, 1% EtOAc/hexanes) afforded 7-(4-nitrophenyl)chromane (**5ad'**) (0.078 g, 60%). TLC:  $R_f$  = 0.90 (SiO<sub>2</sub>, 10% EtOAc/hexanes); <sup>1</sup>H NMR (CDCl<sub>3</sub>, 400 MHz):  $\delta$  8.33-8.22 (m, 2H), 7.75-7.65 (m, 2H), 7.18-7.05 (m, 3H), 4.31-4.21 (m, 2H), 2.85 (t,  $J$  = 6.50 Hz, 2H), 2.13-1.99 (m, 2H); <sup>13</sup>C NMR (CDCl<sub>3</sub>, 101 MHz):  $\delta$  155.4, 147.3, 146.9, 137.8, 130.6, 127.5, 124.0, 123.3, 119.0, 115.5, 66.6, 24.7, 22.2.

**7-(4-Methoxyphenyl)chromane (5ae')**: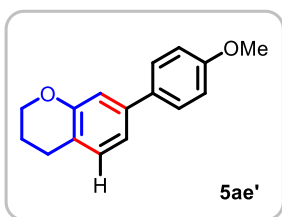

Following the *General Procedure*, to the mixture of 5-hexyn-1-ol (**2a**) (0.1 g, 1.01 mmol) and 1-(4-methoxyphenyl)prop-2-en-1-one (**4e'**) (0.081 g, 0.505 mmol) in anhydrous PhF (2 mL) was added AgOTf (0.012 g, 0.05 mmol) under argon atmosphere at room temperature and reaction mixture was stirred for 6 h at rt. Purification of the crude product by column chromatography (SiO<sub>2</sub>, 1% EtOAc/hexanes) afforded 7-(4-methoxyphenyl)chromane (**5ae'**) (0.071 g, 59%). TLC:  $R_f$  = 0.90 (SiO<sub>2</sub>, 10% EtOAc/hexanes); <sup>1</sup>H NMR (CDCl<sub>3</sub>, 400 MHz):  $\delta$  7.58-7.42 (m, 2H), 7.11-7.03 (m, 2H), 7.02-6.94 (m, 3H), 4.23 (t,  $J$  = 5.13 Hz, 2H), 3.85 (s, 3H), 2.86-2.80 (m, 2H), 2.13-2.00 (m, 2H); <sup>13</sup>C NMR (CDCl<sub>3</sub>, 101 MHz):  $\delta$  159.0, 155.1, 140.1, 133.5, 130.1, 127.9, 120.7, 118.6, 114.7, 114.1, 66.5, 55.3, 24.6, 22.4.

**5-(2,6-Dimethoxyphenyl)-2-methyl-7-phenylchromane (5dk)**: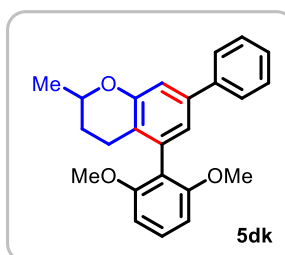

Following the *General Procedure*, to the mixture of hept-6-yn-2-ol (**2d**) (0.1 g, 0.8 mmol) and (*E*)-3-(2,6-dimethoxyphenyl)-1-phenylprop-2-en-1-one (**4k**) (0.119 g, 0.4 mmol) in anhydrous PhF (2 mL) was added AgOTf (0.011 g, 0.04 mmol) under argon atmosphere at room temperature and reaction mixture was stirred for 6 h at rt. Purification of the crude product by column chromatography (SiO<sub>2</sub>, 1% EtOAc/hexanes) afforded 5-(2,6-dimethoxyphenyl)-2-methyl-7-phenylchromane (**5dk**) (0.138 g, 86%). TLC:  $R_f$  = 0.70 (SiO<sub>2</sub>, 10% EtOAc/hexanes); <sup>1</sup>H NMR (CDCl<sub>3</sub>, 400 MHz):  $\delta$

7.65 (d,  $J=7.63$  Hz, 2H), 7.41 (t,  $J = 7.63$  Hz, 2H), 7.37-7.28 (m, 2H), 7.12 (d,  $J = 1.53$  Hz, 1H), 7.03 (d,  $J = 1.53$  Hz, 1H), 6.69 (d,  $J = 8.39$  Hz, 2H), 4.25-4.21 (m, 1H), 3.77 (s, 3H), 3.75 (s, 3H), 2.59-2.53 (m, 1H), 2.46-2.38 (m, 1H), 1.99-1.81 (m, 1H), 1.81-1.67 (m, 1H), 1.45 (d,  $J = 6.10$  Hz, 3H);  $^{13}\text{C}$  NMR ( $\text{CDCl}_3$ , 101 MHz):  $\delta$  157.9, 157.6, 155.1, 141.1, 139.2, 135.3, 128.8, 128.5, 127.0, 126.8, 121.5, 120.9, 118.1, 114.2, 104.0, 103.9, 71.9, 55.9, 55.8, 29.3, 22.6, 21.6; HRMS (ESI)  $m/z$  calcd for  $\text{C}_{24}\text{H}_{25}\text{O}_3$   $[\text{M}+\text{H}]^+$  361.1798 found, 361.1800.

### 2-Methyl-5,7-diphenylchromane (5df):

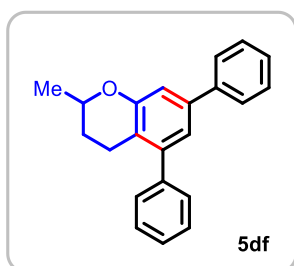

Following the *General Procedure*, to the mixture of hept-6-yn-2-ol (**2d**) (0.1 g, 0.8 mmol) and (*E*)-chalcone (**4f**) (0.092 g, 0.4 mmol) in anhydrous PhF (2 mL) was added AgOTf (0.011 g, 0.04 mmol) under argon atmosphere at room temperature and reaction mixture was stirred for 6 h at rt. Purification of the crude product by column chromatography ( $\text{SiO}_2$ , 1% EtOAc/hexanes) afforded 2-methyl-5,7-

diphenylchromane (**5df**) (0.093 g, 70%). TLC:  $R_f = 0.90$  ( $\text{SiO}_2$ , 10% EtOAc/hexanes);  $^1\text{H}$  NMR ( $\text{CDCl}_3$ , 400 MHz):  $\delta$  7.64-7.59 (m, 2H), 7.47-7.30 (m, 8H), 7.13-7.07 (m, 2H), 4.28-4.19 (m, 1H), 2.84-2.73 (m, 1H), 2.63-2.54 (m, 1H), 2.02-1.94 (m, 1H), 1.72-1.60 (m, 1H), 1.43 (d,  $J = 6.25$  Hz, 3H);  $^{13}\text{C}$  NMR ( $\text{CDCl}_3$ , 101 MHz):  $\delta$  155.5, 143.1, 141.3, 140.7, 139.9, 129.1, 128.7, 128.1, 127.2, 127.0, 126.9, 120.4, 118.8, 114.3, 72.1, 29.4, 24.0, 21.4; HRMS (ESI)  $m/z$  calcd for  $\text{C}_{22}\text{H}_{21}\text{O}$   $[\text{M}+\text{H}]^+$  301.1587, found 301.1587.

### 4-(2-Methyl-7-phenylchroman-5-yl)phenylmethanesulfonate(5dq):

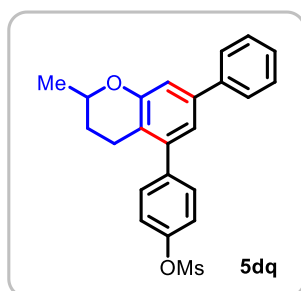

Following the *General Procedure*, to the mixture of hept-6-yn-2-ol (**2d**) (0.1 g, 0.8 mmol) and (*E*)-4-(3-oxo-3-phenylprop-1-en-1-yl)phenyl methanesulfonate (**4q**) (0.134 g, 0.4 mmol) in anhydrous PhF (2 mL) was added AgOTf (0.011 g, 0.04 mmol) under argon atmosphere at room temperature and reaction mixture was stirred for 6 h at rt. Purification of the crude

product by column chromatography ( $\text{SiO}_2$ , 2% EtOAc/hexanes) afforded 4-(2-methyl-7-phenylchroman-5-yl)phenyl methanesulfonate (**5dq**) (0.116 g, 67%). TLC:  $R_f = 0.70$  ( $\text{SiO}_2$ , 20% EtOAc/hexanes);  $^1\text{H}$  NMR ( $\text{CDCl}_3$ , 400 MHz):  $\delta$  7.63-7.58 (m, 2H), 7.46-7.39 (m, 4H), 7.37-7.31 (m, 3H), 7.14-7.11 (m, 1H), 7.05-7.03 (m, 1H), 4.34-4.12 (m, 1H), 3.21 (s, 3H), 2.80-2.71 (m, 1H), 2.65-2.52 (m, 1H), 2.06-1.95 (m, 1H), 1.73-1.60 (m, 1H), 1.45 (d,  $J = 6.25$  Hz, 3H);  $^{13}\text{C}$  NMR ( $\text{CDCl}_3$ , 101 MHz):  $\delta$  155.6, 148.2, 141.6, 140.6, 140.4, 140.1, 130.7,

128.7, 127.4, 126.9, 121.7, 120.4, 118.7, 115.3, 114.8, 72.1, 37.5, 26.9, 24.0, 21.4; HRMS (ESI)  $m/z$  calcd for  $C_{23}H_{23}O_4S$   $[M+H]^+$  395.1312, found 395.1305.

**(3*aS*,9*aR*)-8-(2,6-Dimethoxyphenyl)-6-phenyl-3,3*a*,9,9*a*-tetrahydro-2*H*-furo[3,2-*b*]chromen-2-one (5ek):**

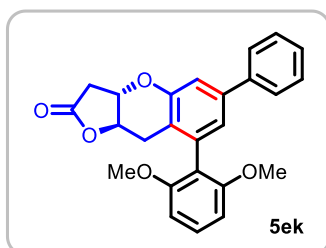

Following the *General Procedure*, to the mixture of (4*S*,5*R*)-5-(but-3-yn-1-yl)-4-hydroxydihydrofuran-2(3*H*)-one (**2e**) (0.1 g, 0.64 mmol) and (*E*)-3-(2,6-dimethoxyphenyl)-1-phenylprop-2-en-1-one (**4k**) (0.085 g, 0.32 mmol) in anhydrous PhF (2 mL) was added AgOTf (0.008 g, 0.032 mmol) under argon atmosphere at room temperature and reaction mixture was stirred for 6 h at rt. Purification of the crude product by column chromatography ( $SiO_2$ , 1% EtOAc/hexanes) afforded (3*aS*,9*aR*)-8-(2,6-dimethoxyphenyl)-6-phenyl-3,3*a*,9,9*a*-tetrahydro-2*H*-furo[3,2-*b*]chromen-2-one (**5ek**) (0.058 g, 45%). TLC:  $R_f$  = 0.70 ( $SiO_2$ , 10% EtOAc/hexanes);  $^1H$  NMR ( $CDCl_3$ , 400 MHz):  $\delta$  7.52-7.58 (m, 2H), 7.44-7.38 (m, 2H), 7.37-7.29 (m, 2H), 7.17-7.15 (m, 2H), 6.68 (dd,  $J$  = 8.4, 1.63 Hz, 2H), 4.92-4.87 (m, 1H), 4.83-4.80 (m, 1H), 3.76 (s, 3H), 3.74 (s, 3H), 2.98-2.81 (m, 4H);  $^{13}C$  NMR ( $CDCl_3$ , 101 MHz):  $\delta$  174.8, 157.9, 157.6, 153.6, 140.6, 140.1, 135.2, 129.3, 128.6, 127.2, 127.1, 124.3, 119.4, 116.5, 114.8, 104.2, 103.8, 78.3, 73.1, 55.9, 55.8, 37.4, 25.7; HRMS (ESI)  $m/z$  calcd for  $C_{25}H_{23}O_5$   $[M+H]^+$  403.1540, found 403.1536.

**2,2-Dimethyl-5,7-diphenylchromane (5ff):**

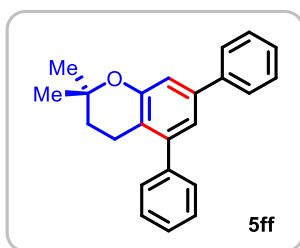

Following the *General Procedure*, to the mixture of 2-methylhept-6-yn-2-ol (**2f**) (0.1 g, 0.79 mmol) and (*E*)-chalcone (**4f**) (0.081 g, 0.39 mmol) in anhydrous PhF (2 mL) was added AgOTf (0.010 g, 0.039 mmol) under argon atmosphere at room temperature and reaction mixture was stirred for 6 h at rt. Purification of the crude product by column chromatography ( $SiO_2$ , 1% EtOAc/hexanes) afforded 2,2-dimethyl-5,7-diphenylchromane (**5ff**) (0.082 g, 67%). TLC:  $R_f$  = 0.90 ( $SiO_2$ , 10% EtOAc/hexanes);  $^1H$  NMR ( $CDCl_3$ , 400 MHz):  $\delta$  7.72-7.66 (m, 2H), 7.51-7.43 (m, 6H), 7.41-7.34 (m, 2H), 7.20-7.14 (m, 2H), 2.75-2.69 (m, 2H), 1.84-1.79 (m, 2H), 1.47 (s, 6H);  $^{13}C$  NMR ( $CDCl_3$ , 101 MHz):  $\delta$  154.4, 143.0, 141.3, 140.7, 140.0, 129.1, 128.6, 128.1, 127.1, 127.0, 126.9, 120.1, 117.9, 114.8, 73.9, 32.9, 26.9, 21.5; IR (KBr,  $cm^{-1}$ ):  $\nu$  3019, 2978, 1600, 1563, 1526, 1468,

1440, 1402, 1332, 1217, 1164, 1029, 967, 929, 772, 702, 669; HRMS (ESI)  $m/z$  calcd for  $C_{23}H_{23}O$   $[M+H]^+$  315.1743, found 315.1740.

### 5-(2,6-Dimethoxyphenyl)-2,2-dimethyl-7-phenylchromane (5fk):

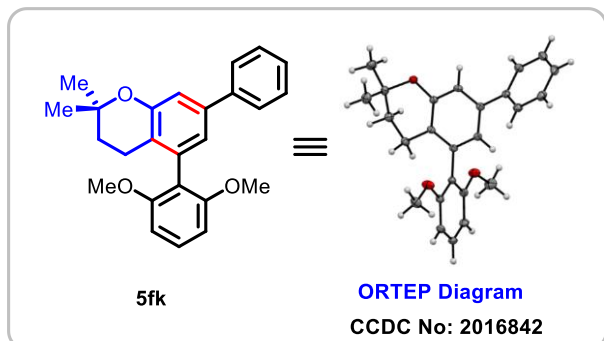

Following the *General Procedure*, to the mixture of 2-methylhept-6-yn-2-ol (**2f**) (0.1 g, 0.79 mmol) and (*E*)-3-(2,6-dimethoxyphenyl)-1-phenylprop-2-en-1-one (**4k**) (0.105 g, 0.39 mmol) in anhydrous PhF (2 mL) was added AgOTf (0.010 g, 0.039 mmol) under argon

atmosphere at room temperature and reaction mixture was stirred for 6h at rt. Purification of the crude product by column chromatography ( $SiO_2$ , 1% EtOAc/hexanes) afforded 5-(2,6-dimethoxyphenyl)-2,2-dimethyl-7-phenylchromane (**5fk**) as a white crystal (0.130 g, 89%). TLC:  $R_f$  = 0.60 ( $SiO_2$ , 10% EtOAc/hexanes);  $^1H$  NMR ( $CDCl_3$ , 400 MHz):  $\delta$  7.65 (d,  $J$  = 7.33 Hz, 2H), 7.43-7.38 (m, 2H), 7.37-7.28 (m, 2H), 7.11 (d,  $J$  = 1.37 Hz, 1H), 7.03 (d,  $J$  = 1.37 Hz, 1H), 6.73-6.65 (m, 2H), 3.76 (s, 6H), 2.49-2.44 (m, 2H), 1.79 (t,  $J$  = 6.87 Hz, 2H), 1.40 (s, 6H);  $^{13}C$  NMR ( $CDCl_3$ , 101 MHz):  $\delta$  157.8, 154.1, 141.1, 139.2, 135.2, 128.8, 128.4, 127.0, 126.7, 121.1, 120.2, 118.2, 114.6, 104.0, 73.9, 55.8, 32.8, 26.8, 20.3; HRMS (ESI)  $m/z$  calcd for  $C_{25}H_{27}O_3$   $[M+H]^+$  375.1955, found 375.1956.

### 2,2-Dimethyl-7-phenyl-5-(4-(trifluoromethyl)phenyl)chromane (5fu):

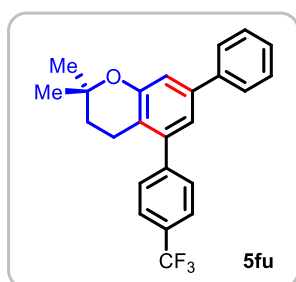

Following the *General Procedure*, to the mixture of 2-methylhept-6-yn-2-ol (**2f**) (0.1 g, 0.79 mmol) and (*E*)-1-phenyl-3-(4-(trifluoromethyl)phenyl)prop-2-en-1-one (**4u**) (0.109 g, 0.39 mmol) in anhydrous PhF (2 mL) was added Ag OTf (0.010 g, 0.039 mmol) under argon atmosphere at room temperature and reaction mixture was stirred for 6h at rt. Purification of the crude product by column

chromatography ( $SiO_2$ , 1% EtOAc/hexanes) afforded 2,2-dimethyl-7-phenyl-5-(4-(trifluoromethyl)phenyl)chromane (**5fu**) (0.097 g, 64%). TLC:  $R_f$  = 0.90 ( $SiO_2$ , 10% EtOAc/hexanes);  $^1H$  NMR ( $CDCl_3$ , 400 MHz):  $\delta$  7.70 (d,  $J$  = 8.00 Hz, 2H), 7.63-7.58 (m, 2H), 7.51 (d,  $J$  = 8.00 Hz, 2H), 7.44-7.40 (m, 2H), 7.36-7.32 (m, 1H), 7.13 (d,  $J$  = 1.88 Hz, 1H), 7.04 (d,  $J$  = 2.00 Hz, 1H), 2.65-2.59 (m, 2H), 1.80-1.75 (m, 2H), 1.41 (s, 6H);  $^{13}C$  NMR

(CDCl<sub>3</sub>, 101 MHz):  $\delta$  154.6, 145.1, 145.0, 141.6, 140.4, 140.3, 129.5, 128.7, 127.4, 126.9, 125.1 (2C), 119.9, 117.7, 115.5, 74.1, 32.8, 26.9, 21.4.

#### 5-(4-Chlorophenyl)-2,2-dimethyl-7-phenylchromane (**5ft**):

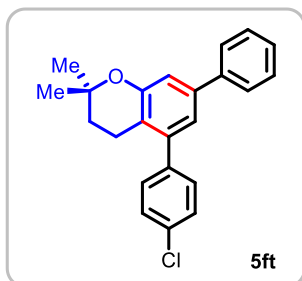

Following the *General Procedure*, to the mixture of 2-methylhept-6-yn-2-ol (**2f**) (0.1 g, 0.79 mmol) and (*E*)-1-phenyl-3-(4-(chloro)phenyl)prop-2-en-1-one (**4t**) (0.095 g, 0.39 mmol) in anhydrous PhF (2 mL) was added AgOTf (0.010 g, 0.039 mmol) under argon atmosphere at room temperature and reaction mixture was stirred for 6h at rt. Purification of the crude product by column chromatography (SiO<sub>2</sub>, 1% EtOAc/hexanes) afforded 5-(4-chlorophenyl)-2,2-dimethyl-7-phenylchromane (**5ft**) (0.081 g, 59%). TLC:  $R_f$  = 0.90 (SiO<sub>2</sub>, 10% EtOAc/hexanes); <sup>1</sup>H NMR (CDCl<sub>3</sub>, 400 MHz):  $\delta$  7.62-7.59 (m, 2H), 7.43-7.39 (m, 4H), 7.35-7.31 (m, 3H), 7.10 (d,  $J$  = 1.88 Hz, 1H), 7.02 (d,  $J$  = 2.0 Hz, 1H), 2.63 (t,  $J$  = 6.75 Hz, 2H), 1.79-1.75 (m, 2H), 1.40 (s, 6H); <sup>13</sup>C NMR (CDCl<sub>3</sub>, 101 MHz):  $\delta$  154.6, 141.8, 140.5, 140.2, 139.8, 133.1, 130.5, 128.7, 128.3, 127.6, 127.3, 126.9, 120.0, 117.8, 115.2, 74.0, 32.9, 26.9, 21.5; HRMS (ESI)  $m/z$  calcd for C<sub>23</sub>H<sub>22</sub>OCl [M+H]<sup>+</sup> 349.1554, found 349.1353.

#### 7-Cyclopropyl-2,2-dimethyl-5-(3-phenoxyphenyl)chromane (**5ff'**):

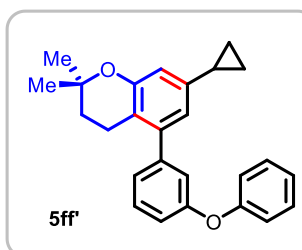

Following the *General Procedure*, to the mixture of 2-methylhept-6-yn-2-ol (**2f**) (0.1 g, 0.79 mmol) and (*E*)-1-cyclopropyl-3-(3-phenoxyphenyl)prop-2-en-1-one (**4f'**) (0.103 g, 0.39 mmol) in anhydrous PhF (2 mL) was add AgOTf (0.010 g, 0.039 mmol) under argon atmosphere at room temperature and reaction mixture was stirred for 6h at rt. Purification of the crude product by column chromatography (SiO<sub>2</sub>, 1% EtOAc/hexanes) afforded 7-cyclopropyl-2,2-dimethyl-5-(3-phenoxyphenyl)chromane (**5ff'**) (0.086 g, 71%). TLC:  $R_f$  = 0.80 (SiO<sub>2</sub>, 10% EtOAc/hexanes); <sup>1</sup>H NMR (CDCl<sub>3</sub>, 500 MHz):  $\delta$  7.41-7.34 (m, 3H), 7.11-7.15 (m, 1H), 7.11-7.07 (m, 3H), 7.02-6.98 (m, 2H), 6.59 (d,  $J$  = 1.91 Hz, 1H), 6.51 (d,  $J$  = 1.91 Hz, 1H), 2.59-2.55 (m, 2H), 1.89-1.81 (m, 1H), 1.73-1.68 (m, 2H), 1.36 (s, 6H), 0.96-0.91 (m, 2H), 0.74-0.69 (m, 2H); <sup>13</sup>C NMR (CDCl<sub>3</sub>, 126 MHz):  $\delta$  157.1, 156.9, 154.2, 143.3, 143.1, 141.8, 129.8, 129.3, 124.0, 123.3, 119.6, 119.1, 118.9, 117.1, 115.7, 113.0, 73.8, 33.0, 26.9, 21.3, 15.0, 9.13.

-----

## 9. Synthesis and characterization of heterocyclic chromanes (**5** or **E5**) from alkynols (**2**) and $\alpha,\beta$ -unsaturated ketone (**4**)

### 5-(4-Methoxyphenyl)-7-(5-methylfuran-2-yl)chromane (**5ag'**):

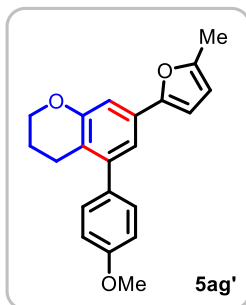

Following the *General Procedure*, to the mixture of 5-hexyn-1-ol (**2a**) (0.1 g, 1.01 mmol) and (*E*)-3-(4-methoxyphenyl)-1-(5-methylfuran-2-yl)prop-2-en-1-one (**4g'**) (0.122 g, 0.505 mmol) in anhydrous PhF (2 mL) was added AgOTf (0.012 g, 0.05 mmol) under argon atmosphere at room temperature and reaction mixture was stirred for 6h at rt. Purification of the crude product by column chromatography (SiO<sub>2</sub>, 1% EtOAc/hexanes) afforded 5-(4-methoxyphenyl)-7-(5-methylfuran-2-yl)chromane (**5ag'**) (0.130 g, 80%). TLC:  $R_f$  = 0.90 (SiO<sub>2</sub>, 10% EtOAc/hexanes); <sup>1</sup>H NMR (CDCl<sub>3</sub>, 200 MHz):  $\delta$  7.30-7.23 (m, 2H), 7.09-7.01 (m, 2H), 6.99-6.82 (m, 2H), 6.45 (d,  $J$  = 3.09 Hz, 1H), 6.07-5.90 (m, 1H), 4.23-4.15 (m, 2H), 3.84 (s, 3H), 2.59 (t,  $J$  = 6.39 Hz, 2H), 2.32 (s, 3H), 2.01-1.81 (m, 2H); <sup>13</sup>C NMR (CDCl<sub>3</sub>, 101 MHz):  $\delta$  158.7, 155.1, 152.0, 151.7, 142.8, 133.4, 130.1, 129.9, 118.9, 117.1, 113.5, 110.3, 107.5, 105.7, 66.2, 55.3, 24.2, 22.5, 13.7; HRMS (ESI)  $m/z$  calcd for C<sub>21</sub>H<sub>21</sub>O<sub>3</sub> [M+H]<sup>+</sup> 321.1485, found 321.1485.

### 5,7-Di(thiophen-2-yl)chromane (**5ah'**):

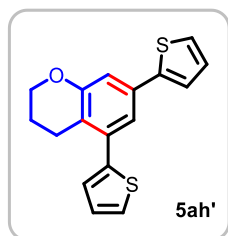

Following the *General Procedure*, to the mixture of 5-hexyn-1-ol (**2a**) (0.1 g, 1.01 mmol) and (*E*)-1,3-di(thiophen-2-yl)prop-2-en-1-one (**4h'**) (0.111 g, 0.505 mmol) in anhydrous PhF (2 mL) was added AgOTf (0.012 g, 0.05 mmol) under argon atmosphere at room temperature and reaction mixture was stirred for 6h at rt. Purification of the crude product by column chromatography (SiO<sub>2</sub>, 1% EtOAc/hexanes) afforded 5,7-di(thiophen-2-yl)chromane (**5ah'**) (0.108 g, 72%). TLC:  $R_f$  = 0.90 (SiO<sub>2</sub>, 10% EtOAc/hexanes); <sup>1</sup>H NMR (CDCl<sub>3</sub>, 500 MHz):  $\delta$  7.38-7.37 (m, 1H), 7.31-7.29 (m, 1H), 7.27-7.24 (m, 2H), 7.16-7.04 (m, 4H), 4.30-4.20 (m, 2H), 2.82 (t,  $J$  = 6.49 Hz, 2H), 2.03-1.95 (m, 2H); <sup>13</sup>C NMR (CDCl<sub>3</sub>, 126 MHz):  $\delta$  155.4, 143.7, 141.8, 135.6, 133.2, 127.9, 127.1, 126.8, 125.5, 124.8, 123.2, 120.3, 120.1, 113.8, 66.2, 24.3, 22.4; HRMS (ESI)  $m/z$  calcd for C<sub>17</sub>H<sub>15</sub>OS<sub>2</sub> [M+H]<sup>+</sup> 299.0559 found 299.0558.

### 7-Phenyl-5-(thiophen-3-yl)chromane (**5ai'**):

Following the *General Procedure*, to the mixture of 5-hexyn-1-ol (**2a**) (0.1 g, 1.01 mmol) and (*E*)-1-phenyl-3-(thiophen-3-yl)prop-2-en-1-one (**4i'**) (0.108 g, 0.505 mmol) in anhydrous PhF



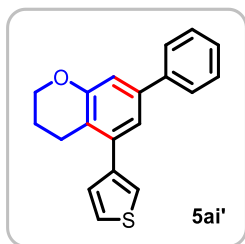

(2 mL) was added AgOTf (0.012 g, 0.05 mmol) under argon atmosphere at room temperature and reaction mixture was stirred for 6h at rt. Purification of the crude product by column chromatography (SiO<sub>2</sub>, 1% EtOAc/hexanes) afforded 7-phenyl-5-(thiophen-3-yl)chromane (**5ai'**) (0.093 g, 63%). TLC:  $R_f$  = 0.90 (SiO<sub>2</sub>, 10% EtOAc/hexanes); <sup>1</sup>H NMR (CDCl<sub>3</sub>, 400 MHz):  $\delta$  7.63-7.58 (m, 2H), 7.46-7.37 (m, 3H), 7.36-7.31 (m, 1H), 7.28 (s, 1H), 7.21-7.18 (m, 1H), 7.15 (d,  $J$  = 1.5 Hz, 1H), 7.07 (d,  $J$  = 1.5 Hz, 1H), 4.28-2.23 (m, 2H), 2.78-2.73 (m, 2H), 2.03-1.96 (m, 2H); <sup>13</sup>C NMR (CDCl<sub>3</sub>, 101 MHz):  $\delta$  155.3, 141.3, 140.6, 140.0, 138.0, 128.8, 128.7, 127.3, 127.0, 125.0, 122.9, 120.6, 119.4, 114.5, 66.3, 24.1, 22.4; IR (KBr, cm<sup>-1</sup>):  $\nu$  3019, 2929, 1600, 1566, 1528, 1474, 1310, 1216, 1017, 772, 669.

### 5-(furan-2-yl)-2,2-dimethyl-7-phenylchromane (**5fj'**) and 2,2-dimethyl-7-phenylchromane (**E5fc'**):

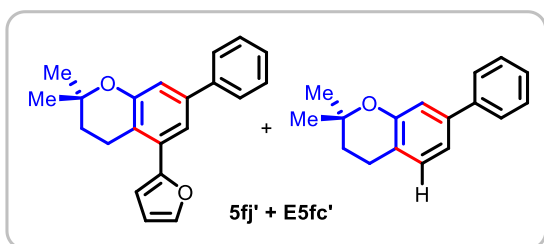

Following the *General Procedure*, to the mixture of 2-methylhept-6-yn-2-ol (**2f**) (0.1 g, 0.79 mmol) and (*E*)-3-(furan-2-yl)-1-phenylprop-2-en-1-one (**4j'**) (0.077 g, 0.39 mmol) in anhydrous PhF (2 mL) was add

AgOTf(0.010 g, 0.039 mmol) under argon atmosphere at room temperature and reaction mixture was stirred for 6 h at rt. Purification of the crude product by column chromatography (SiO<sub>2</sub>, 1% EtOAc/hexanes) afforded 5-(furan-2-yl)-2,2-dimethyl-7-phenylchromane (**5fj'**) and 2,2-dimethyl-7-phenylchromane (**E5fc'**) (0.089 g, 70%). TLC:  $R_f$  = 0.90 (SiO<sub>2</sub>, 10% EtOAc/hexanes); <sup>1</sup>H NMR (CDCl<sub>3</sub>, 400 MHz):  $\delta$  7.66-7.56 (m, 3H), 7.47-7.39 (m, 4H), 7.37-7.30 (m, 2H), 7.16-7.01 (m, 4H), 2.98-2.92 (m, 1H), 2.83 (t,  $J$  = 6.75 Hz, 2H), 1.89-1.83 (m, 3H), 1.41 (s, 3H), 1.38 (s, 6H); <sup>13</sup>C NMR (CDCl<sub>3</sub>, 101 MHz):  $\delta$  154.2, 141.0, 140.5, 129.8, 128.7, 128.6, 127.2, 127.0 (3C), 126.9, 120.0, 118.5, 117.4, 115.7, 115.0, 74.3, 73.6, 32.8, 27.0, 22.2.

### 7-Phenyl-5-(thiophen-2-yl)chromane (**5ak'**) and 7-phenylchromane (**5ac'**):

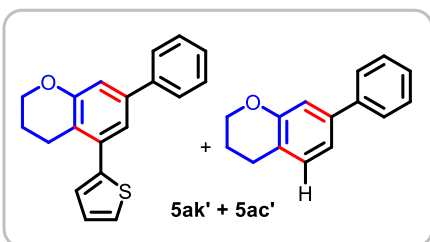

Following the *General Procedure*, to the mixture of 5-hexyn-1-ol (**2a**) (0.1 g, 1.01 mmol) and (*E*)-1-phenyl-3-(thiophen-2-yl)prop-2-en-1-one (**4k'**) (0.108 g, 0.505 mmol) in anhydrous PhF (2 mL) was added AgOTf (0.010 g, 0.05 mmol) under argon atmosphere at room

temperature and reaction mixture was stirred for 6h at rt. Purification of the crude product by column chromatography (SiO<sub>2</sub>, 1% EtOAc/hexanes) afforded a mixture of 7-phenyl-5-(thiophen-2-yl)chromane (**5ak'**) and 7-phenylchromane (**5ac'**) (0.079 g, 90%). TLC:  $R_f$  = 0.90 (SiO<sub>2</sub>, 10% EtOAc/hexanes); <sup>1</sup>H NMR (CDCl<sub>3</sub>, 400 MHz):  $\delta$  7.59-7.51(m, 4H), 7.42-7.35 (m, 4H), 7.34-7.26 (m, 3H), 7.23-7.20 (m, 1H), 7.11-6.99 (m, 6H), 4.27-4.13 (m, 4H), 2.84-2.78 (m, 4H), 2.06-1.92 (m, 4H); <sup>13</sup>C NMR (CDCl<sub>3</sub>, 101 MHz):  $\delta$  155.5, 155.1, 142.1, 140.9, 140.5, 140.4, 140.0, 135.5, 130.1, 128.7, 128.7, 127.4, 127.1, 127.0, 126.9, 126.6, 125.3, 121.4, 121.3, 119.7, 118.9, 115.2, 115.1, 66.5, 66.1, 24.6, 24.3, 22.4.

### 7-Phenylchromane (**5ac'**):

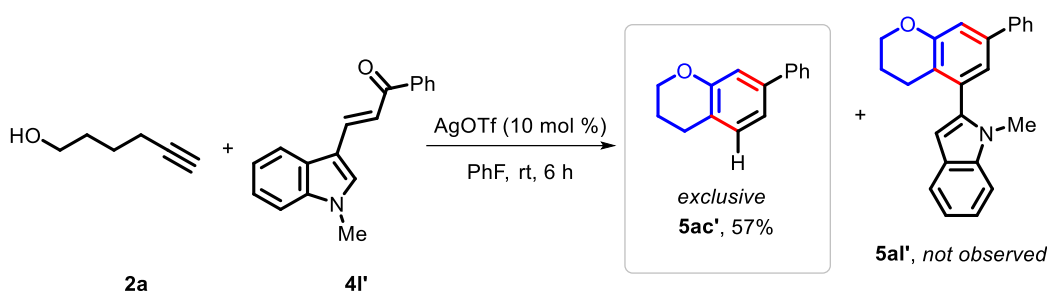

Following the *General Procedure*, to the mixture of 5-hexyn-1-ol (**2a**) (0.1 g, 1.01 mmol) and (*E*)-3-(1-methyl-1H-indol-2-yl)-1-phenylprop-2-en-1-one (**4l'**) (0.131 g, 0.505 mmol) in anhydrous PhF (2 mL) was added AgOTf (0.012 g, 0.05 mmol) under argon atmosphere at room temperature and reaction mixture was stirred for 6h at rt. Purification of the crude product by column chromatography (SiO<sub>2</sub>, 1% EtOAc/hexanes) afforded 7-phenylchromane (**5ac'**) (0.060 g, 57%). TLC:  $R_f$  = 0.90 (SiO<sub>2</sub>, 10% EtOAc/hexanes); <sup>1</sup>H NMR (CDCl<sub>3</sub>, 200 MHz):  $\delta$  7.56-7.44 (m, 2H), 7.39-7.27 (m, 2H), 7.25-7.17 (m, 1H), 7.06-6.92 (m, 3H), 4.20-4.12 (m, 2H), 2.81-2.71 (m, 2H), 2.05-1.82 (m, 2H); <sup>13</sup>C NMR (CDCl<sub>3</sub>, 101 MHz):  $\delta$  155.1, 140.9, 140.5, 130.1, 128.7, 127.1, 126.9, 121.3, 119.0, 115.2, 66.5, 24.7, 22.4; HRMS (ESI)  $m/z$  calcd for C<sub>15</sub>H<sub>15</sub>O [M+H]<sup>+</sup> 211.1117, found 211.1116.



**(S)-7-Phenyl-2,3,3a,4-tetrahydro-1H-benzo[b]pyrrolo[1,2-d][1,4]oxazin-1-one (E5gk):**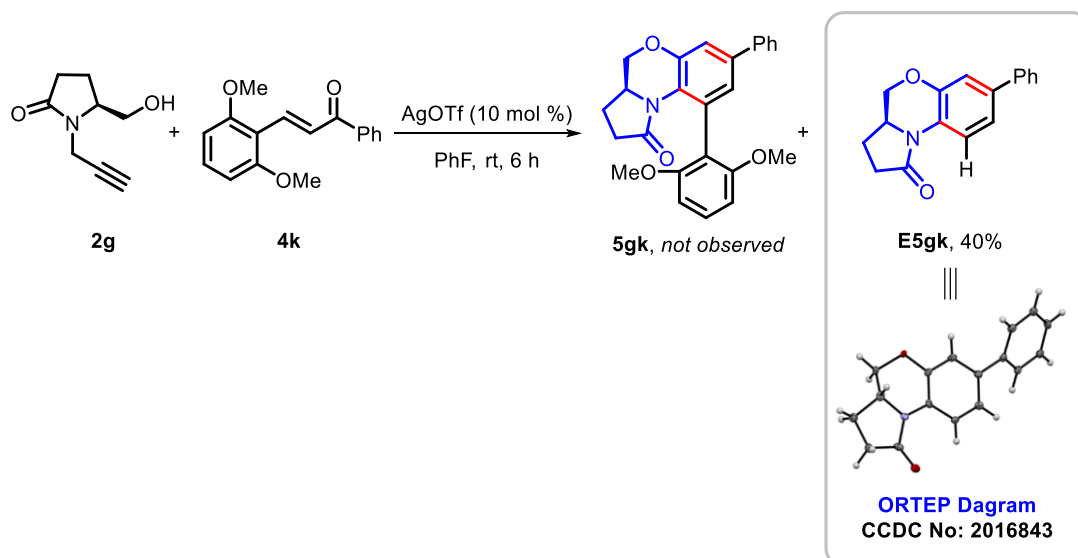

Following the *General Procedure*, to the mixture of (*S*)-5-(hydroxymethyl)-1-(prop-2-yn-1-yl)pyrrolidin-2-one (**2g**) (0.1 g, 0.63 mmol) and (*E*)-3-(2,6-dimethoxyphenyl)-1-phenylprop-2-en-1-one (**4k**) (0.084 g, 0.31 mmol) in anhydrous  $\text{PhF}$  (2 mL) was added  $\text{AgOTf}$  (0.008 g, 0.031 mmol) under argon atmosphere at room temperature and reaction mixture was stirred for 6 h at 85 °C. Purification of the crude product by column chromatography ( $\text{SiO}_2$ , 1%  $\text{EtOAc}$ /hexanes) afforded (*S*)-7-phenyl-2,3,3a,4-tetrahydro-1H-benzo[b]pyrrolo[1,2-d][1,4]oxazin-1-one (**E5gk**) as a white crystal (0.034 g, 40%). TLC:  $R_f = 0.90$  ( $\text{SiO}_2$ , 10%  $\text{EtOAc}$ /hexanes);  $^1\text{H}$  NMR ( $\text{CDCl}_3$ , 200 MHz):  $\delta$  8.59 (d,  $J = 8.60$  Hz, 1H), 7.61-7.57 (m, 1H), 7.55-7.33 (m, 3H), 7.33-7.17 (m, 3H), 4.54 (dd,  $J = 10.58, 2.98$  Hz, 1H), 4.20-4.02 (m, 1H), 3.90-3.74 (m, 1H), 2.82-2.47 (m, 2H), 2.45-2.27 (m, 1H), 1.85-1.66 (m, 1H);  $^{13}\text{C}$  NMR ( $\text{CDCl}_3$ , 126 MHz):  $\delta$  172.5, 144.7, 140.2, 137.7, 128.8, 127.3, 126.8, 124.21, 120.2, 119.5, 115.2, 69.6, 54.0, 31.1, 21.0; HRMS (ESI)  $m/z$  calcd for  $\text{C}_{17}\text{H}_{16}\text{O}_2\text{N}$   $[\text{M}+\text{H}]^+$  266.1176, found 266.1173.

-----

## 10. Scheme S2. Unsuccessful [3+3]-annulation experiments:

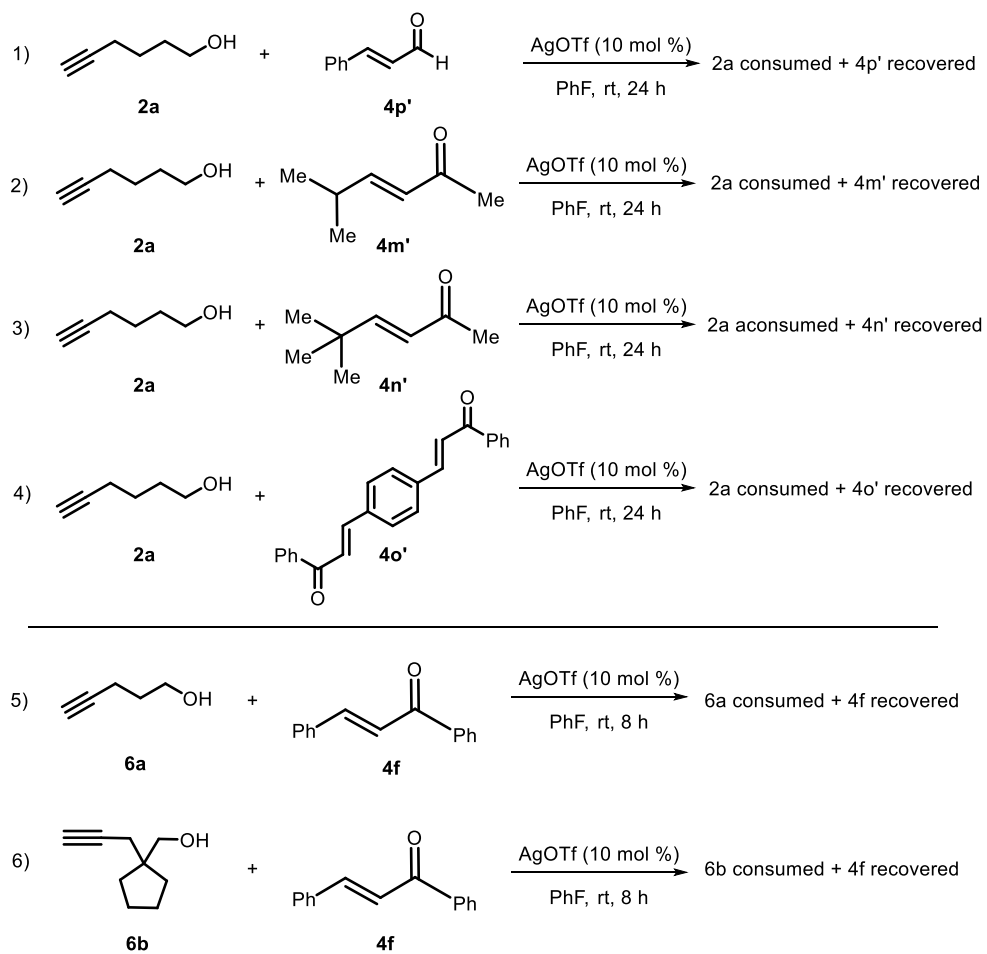

## 11. X-ray crystallography data:

The single crystal X-ray diffraction measurements were performed for **5fk**, **E5gk** and **T3ab** at 100 K using APEX3 (Bruker, 2016; Bruker D8 VENTURE Kappa Duo PHOTON II CPAD) diffractometer having graphite-monochromatized (Mo = 0.71073 Å). The X-ray generator was operated at 50 kV and 30 mA. A preliminary set of unit cell parameters and an orientation matrix were calculated from a total of 36 frames, and the cell refinement was performed by SAINT-Plus (Bruker, 2016). An optimized strategy used for data collection consisted of different sets of  $\varphi$  and  $\omega$  scans with 0.5° steps  $\varphi/\omega$ . The data were collected with a time frame of 10 Sec for all the three components by setting the sample to detector distance fixed at 40 cm. All the data points were corrected for Lorentzian, polarization, and absorption effects using SAINT-Plus and SADABS programs (Bruker, 2016). SHELXS-97 (Sheldrick, 2008) was used for structure solution and full-matrix least-squares refinement on  $F^2$ . The molecular graphics of ORTEP diagrams of all three components were performed by Mercury software. The crystal symmetry of all the three components of single crystals are cross-checked by running the cif files through PLATON (Spek, 2020) software, and notified that there is no additional symmetry was observed. The Encifer software was used to correct the cif files (Figures 1, 2 and 3).

All the three compounds **5fk**, **E5gk** and **T3ab** have been crystallized in Monoclinic space group  $P2_1/c$ ,  $P2_1$  and  $P2_1/c$  respectively from the 1% EtOAc/pet.ether solvent by the slow evaporation method. The asymmetric unit contains one molecule in compound **5fk** and **T3ab**, while two molecules are present in **E5gk** component (Tables 1 and 2).

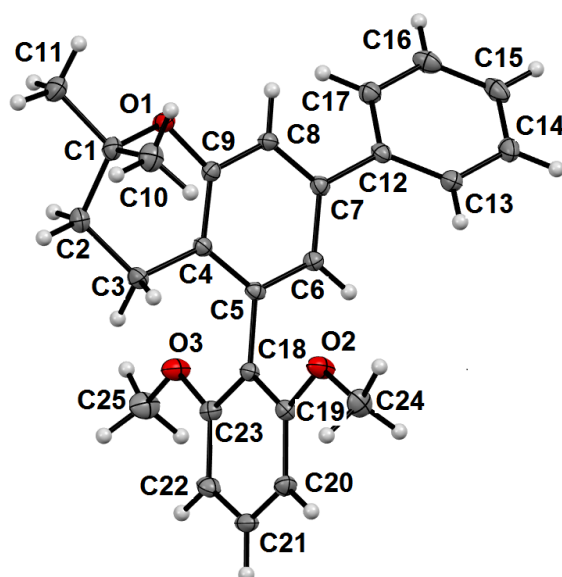

**Figure S1.** ORTEP diagram of **5fk**, herein, the thermal ellipsoids are drawn with 50% of probability. Moreover, the asymmetric unit contains a single molecule.

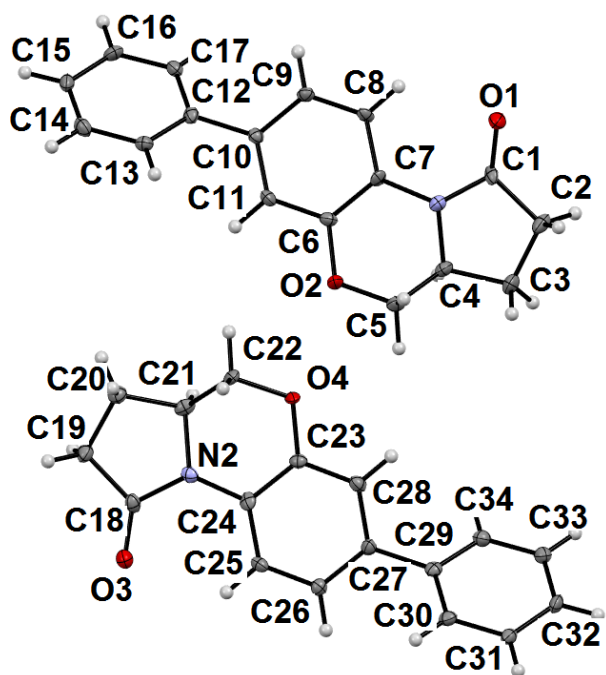

**Figure S2.** ORTEP diagram of **E5gk**, herein, the thermal ellipsoids are drawn with 50% of probability. Moreover, the asymmetric unit contains two molecules.

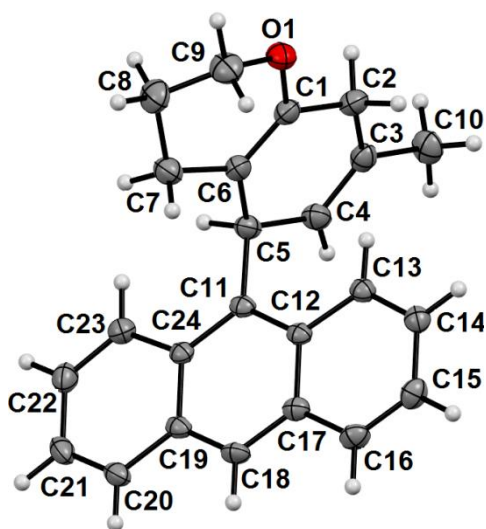

**Figure S3.** ORTEP diagram of **T3ab**, herein, the thermal ellipsoids are drawn with 50% of probability. Moreover, the asymmetric unit contains a single molecule.

**Table S2.** Crystallographic information details about the compound **5fk**, **E5gk** and **T3ab**.

| Crystal data                                                      | Compound <b>5fk</b>                            | Compound <b>E5gk</b>                            | Compound <b>T3ab</b>                       |
|-------------------------------------------------------------------|------------------------------------------------|-------------------------------------------------|--------------------------------------------|
| Chemical formula                                                  | C <sub>25</sub> H <sub>26</sub> O <sub>3</sub> | C <sub>17</sub> H <sub>15</sub> NO <sub>2</sub> | C <sub>24</sub> H <sub>22</sub> O          |
| Formula weight (M <sub>r</sub> )                                  | 374.46                                         | 265.30                                          | 326.42                                     |
| Crystal system                                                    | Monoclinic                                     | Monoclinic                                      | Monoclinic                                 |
| Space group                                                       | <i>P</i> 2 <sub>1</sub> / <i>c</i>             | <i>P</i> 2 <sub>1</sub>                         | <i>P</i> 2 <sub>1</sub> / <i>c</i>         |
| Temperature T (K)                                                 | 100 (2)                                        | 100 (2)                                         | 100 (2)                                    |
| a (Å)                                                             | 14.6475(7)                                     | 7.2766(18)                                      | 9.9695(5)                                  |
| b (Å)                                                             | 10.4651(5)                                     | 14.676(4)                                       | 7.7193(4)                                  |
| c (Å)                                                             | 13.6161(6)                                     | 12.381(4)                                       | 22.7874(10)                                |
| α (°)                                                             | 90                                             | 90                                              | 90                                         |
| β (°)                                                             | 103.479(2)                                     | 101.962(13)                                     | 101.538(2)                                 |
| γ (°)                                                             | 90                                             | 90                                              | 90                                         |
| Z                                                                 | 4                                              | 4                                               | 4                                          |
| Volume (Å <sup>3</sup> )                                          | 2029.69(16)                                    | 1293.5(6)                                       | 1718.22(15)                                |
| Source of radiation                                               | MoKα                                           | MoKα                                            | MoKα                                       |
| D <sub>calc</sub> (g cm <sup>-3</sup> )                           | 1.225                                          | 1.362                                           | 1.262                                      |
| Crystal size (mm)                                                 | 0.5x0.19x0.16                                  | 0.56x0.24x0.22                                  | 0.42Xx0.2x0.12                             |
| μ (mm <sup>-1</sup> )                                             | 0.079                                          | 0.090                                           | 0.075                                      |
| <b>Data collection</b>                                            |                                                |                                                 |                                            |
| Diffractometer                                                    | Bruker D8 VENTURE Kappa Duo PHOTON II CPAD     | Bruker D8 VENTURE Kappa Duo PHOTON II CPAD      | Bruker D8 VENTURE Kappa Duo PHOTON II CPAD |
| Absorption correction                                             | Multi-scan (SADABS; Bruker, 2016)              | Multi-scan (SADABS; Bruker, 2016)               | Multi-scan (SADABS; Bruker, 2016)          |
| T <sub>min</sub> , T <sub>max</sub>                               | 0.3929, 0.7455                                 | 0.6561, 0.7451                                  | 0.4158, 0.7455                             |
| No. of measured, independent and observed [I > 2σ(I)] reflections | 63797, 4351, 3979                              | 46945, 5615, 5525                               | 32959, 3351, 3027                          |
| Theta range (°)                                                   | 2.41-27.11                                     | 2.78-27.16                                      | 2.48-27.11                                 |
| R <sub>int</sub>                                                  | 0.0596                                         | 0.0790                                          | 0.0765                                     |
| <b>Refinement</b>                                                 |                                                |                                                 |                                            |
| R[F <sup>2</sup> > 2σ(F <sup>2</sup> )], wR(F <sup>2</sup> )      | 0.0551                                         | 0.0782                                          | 0.0721                                     |
| GOF on F <sup>2</sup>                                             | 1.216                                          | 1.129                                           | 1.056                                      |
| No. of independent reflections                                    | 4351                                           | 5615                                            | 3351                                       |
| No. of parameters                                                 | 258                                            | 362                                             | 227                                        |
| No. of restraints                                                 | 0                                              | 1                                               | 0                                          |
| H-atom treatment                                                  | constr                                         | constr                                          | constr                                     |
| Δρ <sub>max</sub> , Δρ <sub>min</sub> (e Å <sup>-3</sup> )        | 0.570, -0.564                                  | 0.665, -0.373                                   | 0.709, -0.328                              |
| <b>CCDC number</b>                                                | <b>2016842</b>                                 | <b>2016843</b>                                  | <b>2016844</b>                             |

**Table S3.** Hydrogen-bond geometry ( $A^\circ$ ,  $^\circ$ ) of compound **5fk**, **E5gk** and **T3ab**.

| Name of the compound | $D-H\cdots A$                       | $D-H$ | $H\cdots A$ | $D\cdots A$ | $D-H\cdots A$ |
|----------------------|-------------------------------------|-------|-------------|-------------|---------------|
| Compound <b>5fk</b>  | C21-H21 $\cdots$ O2                 | 0.95  | 2.57        | 3.2738(15)  | 131           |
| Compound <b>E5gk</b> | C4-H4 $\cdots$ O3                   | 1.00  | 2.59        | 3.317(8)    | 130           |
|                      | C8-H8 $\cdots$ O1                   | 0.95  | 2.44        | 2.995(8)    | 117           |
|                      | C25-H25 $\cdots$ O3                 | 0.95  | 2.33        | 2.946(8)    | 122           |
| Compound <b>T3ab</b> | There is no prominent hydrogen bond |       |             |             |               |

-----

## 12. Supporting experiments for the postulated reaction mechanism:

**12.a. Real-time GC-MS analyses:** To gain insight into the probable reaction pathway, the following experiment was carried out under optimized reaction conditions using alkynol **2a** (hex-5-yn-1-ol) and enone **4a** ((*E*)-4-phenylbut-3-en-2-one) in PhF solvent at room temperature, which was monitored through GC-MS analyses at 1 h, 3 h and 5 h reaction times. To our delight we were able to find cyclic eno-ether intermediate (**T1aa**) as a major product at  $t_1 = 1$  h with  $m/z$  value of 99.1 (Figure 4), 1,3-cyclohexadiene intermediate (**T3aa**) at  $t_2 = 2$  h with  $m/z$  value of 226.2 (Figure 5) and also the final desired product **5aa** at  $t_3 = 2$  h 37 min h with  $m/z$  value of 224.2 (Figure 6). This investigation results were in accordance with the proposed mechanistic sequence.

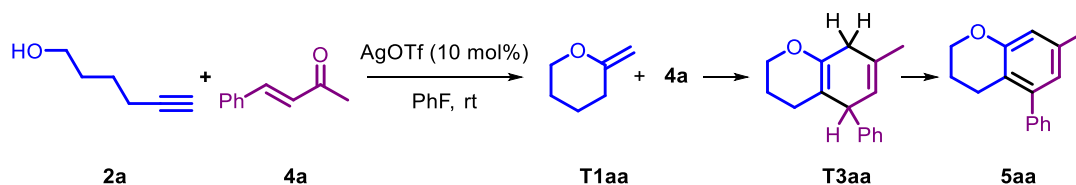

### GC-MS Method Details:

- Instrument name: Agilent 7890N 5977MSD
- Column: HP-5MS column
- Diameter: 30 m X 0.25 micro meter X 0.25 mm
- temperature:  $80^\circ\text{C}$  (1 min.)  $\xrightarrow{20 \text{ min.}}$   $280^\circ\text{C}$  (10 min.)
- Injected temp:  $250^\circ\text{C}$
- Detector temp:  $280^\circ\text{C}$
- Solvent: MeOH

File :D:\NCL\DATA\OCD\Year\_2019\190445.D  
Operator : Dr. Borikar  
Acquired : 20 Jun 2019 19:40 using AcqMethod OCD2019.M  
Instrument : GCMS  
Sample Name: F  
Misc Info :  
Vial Number: 3

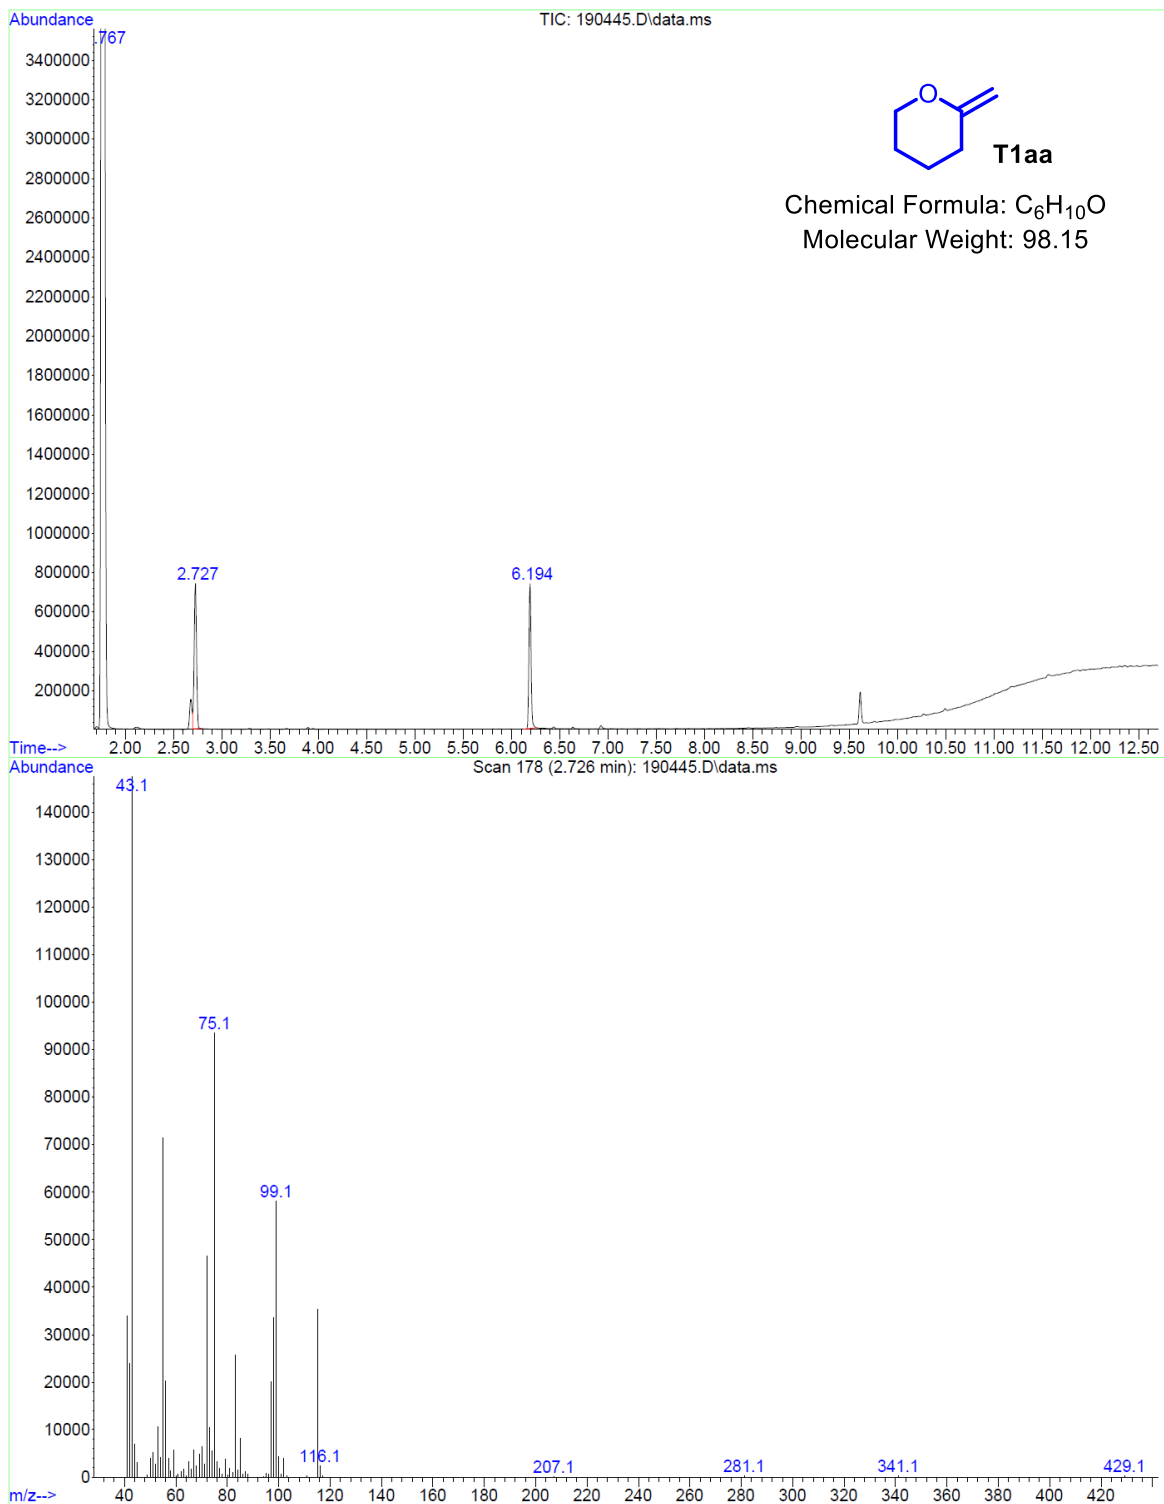

**Figure S4.** GC-MS chromatogram at  $t_1 = 1$  h of the reaction mixture of **2a** and **4a**.

File :D:\NCL\DATA\OCD\Year\_2019\190448.D  
Operator : Dr. Borikar  
Acquired : 20 Jun 2019 20:35 using AcqMethod OCD2019.M  
Instrument : GCMS  
Sample Name: I  
Misc Info :  
Vial Number: 6

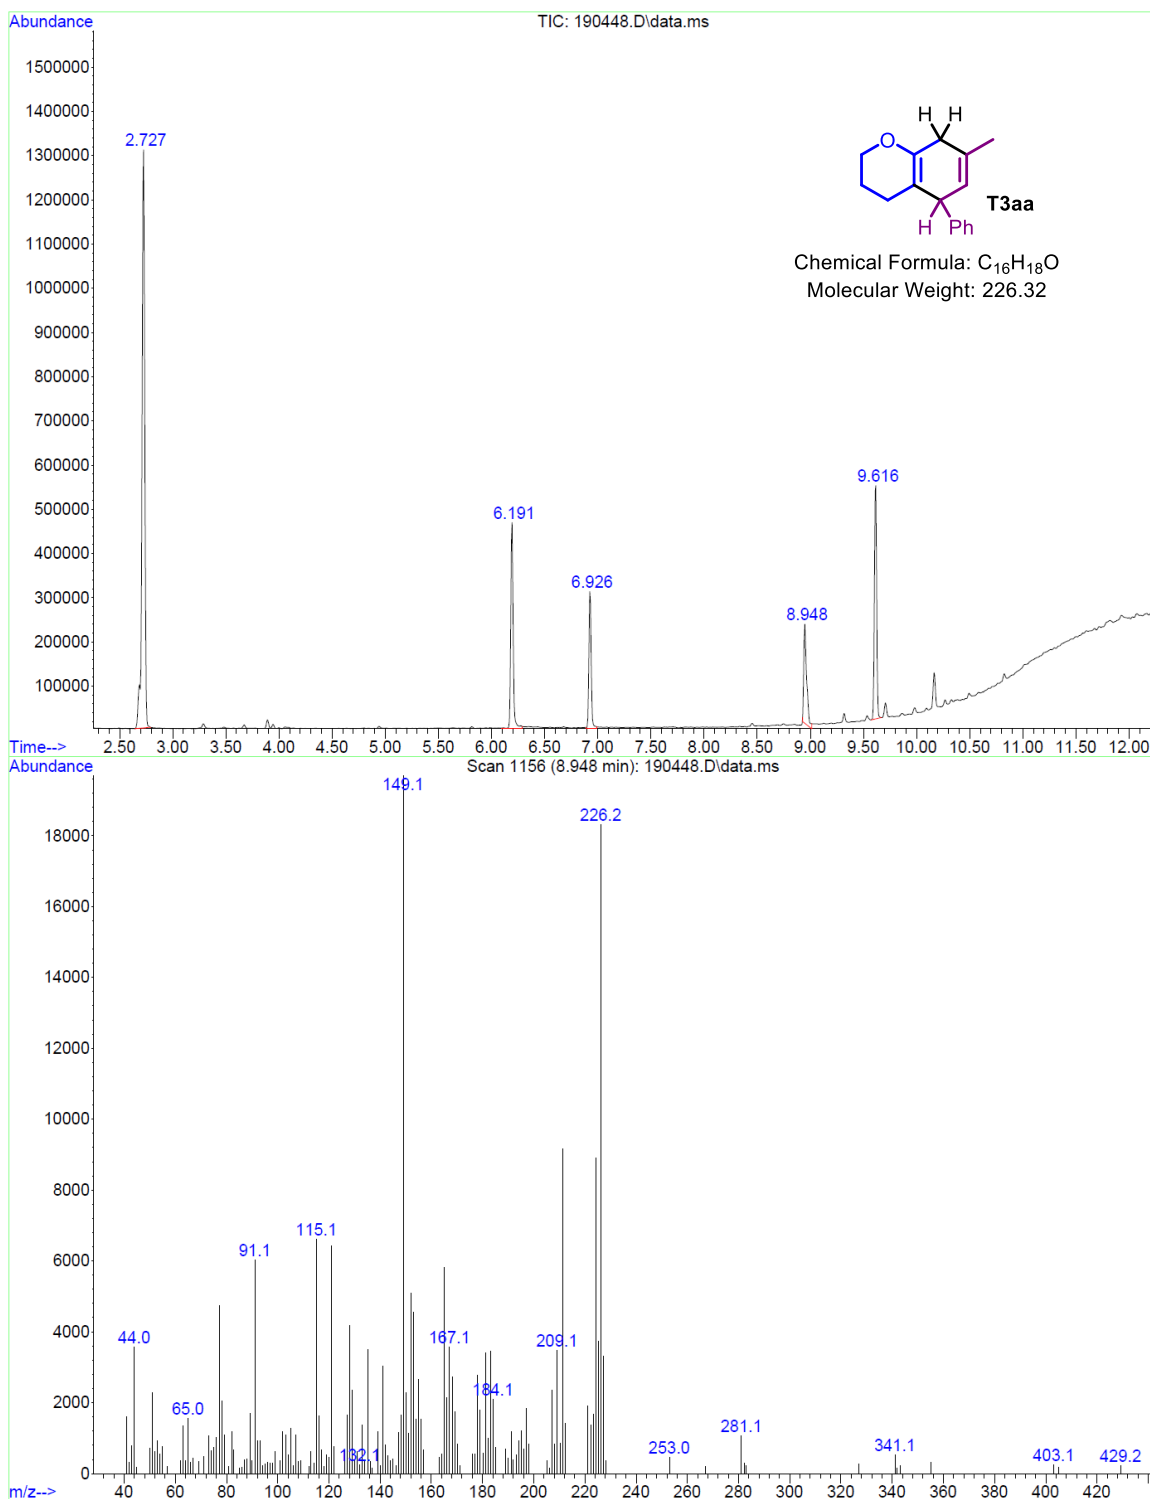

Figure S5. GC-MS chromatogram at  $t_2 = 2$ h of the reaction mixture of **2a** and **4a**.



File : D:\NCL\DATA\OCD\Year\_2019\190450.D  
Operator : Dr. Borikar  
Acquired : 20 Jun 2019 21:12 using AcqMethod OCD2019.M  
Instrument : GCMS  
Sample Name : K  
Misc Info :  
Vial Number : 8

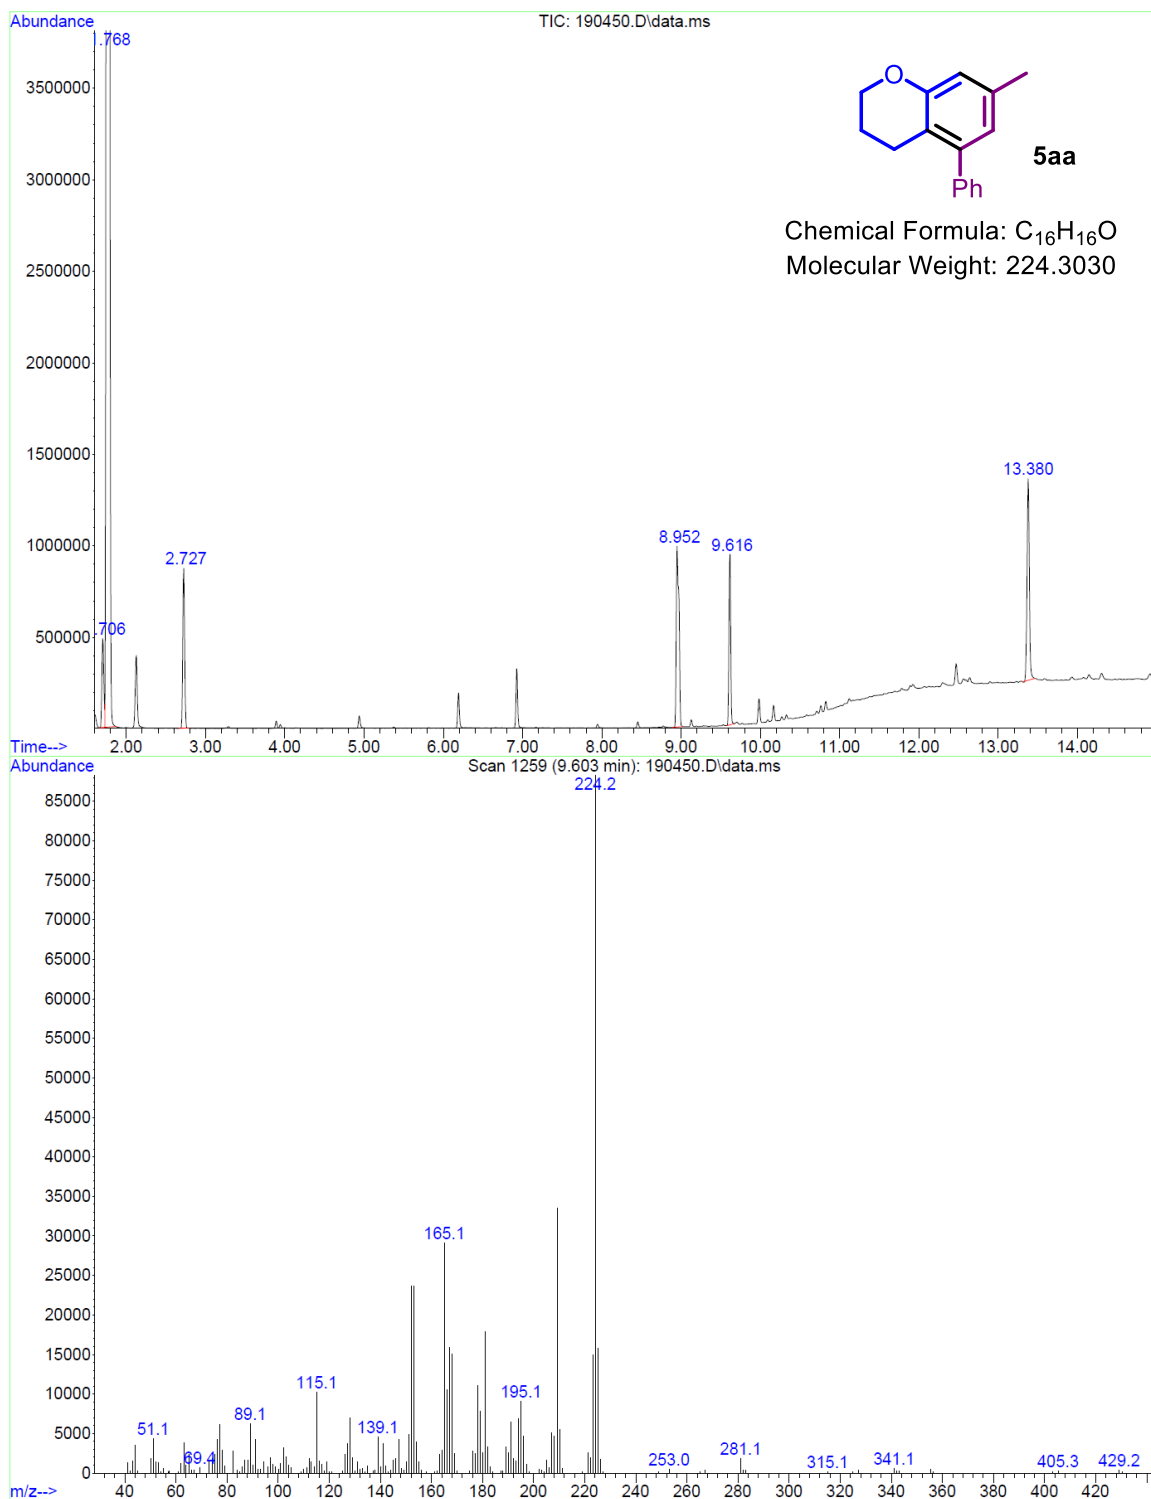

**Figure S6.** GC-MS chromatogram at  $t_3 = 2\text{h}37\text{ min}$  of the reaction mixture of **2a** and **4a**.

## 12.b. Reactions under oxygen atmosphere:

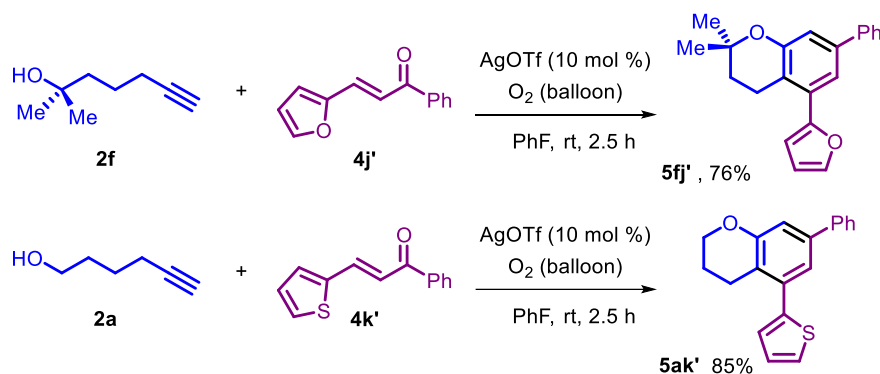

## 5-(Furan-2-yl)-2,2-dimethyl-7-phenylchromane(5fj'):

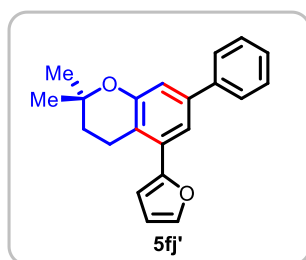

Following the *General Procedure*, to the mixture of 2-methylhept-6-yn-2-ol (**2f**) (0.1 g, 0.79 mmol) and (*E*)-3-(furan-2-yl)-1-phenylprop-2-en-1-one (**4j'**) (0.077 g, 0.39 mmol) in anhydrous PhF (2 mL) was added AgOTf (0.010 g, 0.039 mmol) under oxygen atmosphere (O<sub>2</sub> balloon pressure) at room temperature and reaction mixture was stirred for 6 h at rt. Purification of the crude product by column chromatography (SiO<sub>2</sub>, 1% EtOAc/hexanes) afforded **5fj'** (0.147 g, 76%). TLC: *R<sub>f</sub>* = 0.90 (SiO<sub>2</sub>, 10% EtOAc/hexanes); <sup>1</sup>H NMR (CDCl<sub>3</sub>, 400 MHz): δ 7.67-7.62 (m, 2H), 7.55-7.49 (m, 2H), 7.46-7.41 (m, 2H), 7.36-7.31 (m, 1H), 7.06 (d, *J* = 1.88 Hz, 1H), 6.58 (dd, *J* = 3.38, 0.63 Hz, 1H), 6.53 (dd, *J* = 3.38, 1.88 Hz, 1H), 2.98-2.90 (m, 2H), 1.89-1.85 (m, 2H), 1.41 (s, 6H); <sup>13</sup>C NMR (CDCl<sub>3</sub>, 101 MHz): δ 154.7, 153.4, 141.8, 140.6, 140.1, 131.2, 129.8, 128.7, 128.6, 127.2, 127.0, 126.9, 120.9, 117.9, 117.3, 115.5, 111.2, 73.7, 32.8, 26.9, 26.8, 21.9.

## 7-Phenyl-5-(thiophen-2-yl)chromane(5ak'):

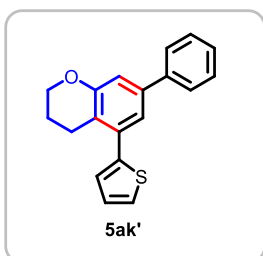

Following the *General Procedure*, to the mixture of 5-hexyn-1-ol (**2a**) (0.1 g, 1.01 mmol) and (*E*)-1-phenyl-3-(thiophen-2-yl)prop-2-en-1-one (**4k'**) (0.108 g, 0.505 mmol) in anhydrous PhF (2 mL) was added AgOTf (0.010 g, 0.05 mmol) under oxygen atmosphere (O<sub>2</sub> balloon pressure) at room temperature and reaction mixture was stirred for 2.5 h at rt (both starting materials were completely consumed as per the TLC visualization). Purification of the crude product by column chromatography (SiO<sub>2</sub>, 1% EtOAc/hexanes) afforded **5ak'** (0.125 g, 85%). TLC: *R<sub>f</sub>* = 0.90 (SiO<sub>2</sub>, 10% EtOAc/hexanes); <sup>1</sup>H NMR (CDCl<sub>3</sub>, 400 MHz): δ 7.66-7.57 (m, 2H), 7.48-7.42 (m, 2H), 7.40-7.33 (m, 2H),

7.26 (d,  $J = 1.9$  Hz, 1H), 7.16-7.05 (m, 3H), 4.26 (t,  $J = 5.1$  Hz, 2H), 2.87 (t,  $J = 6.5$  Hz, 2H), 2.06-1.98 (m, 2H);  $^{13}\text{C}$  NMR ( $\text{CDCl}_3$ , 101 MHz):  $\delta$  155.5, 142.1, 140.4, 140.0, 135.5, 128.7, 127.4, 127.0 (2C), 126.6, 125.3, 121.4, 119.7, 115.1, 66.2, 24.3, 22.4.

---

### 13. Quantum chemical calculations:

The quantum chemical calculations have been performed using density functional theory (DFT), as a tool with the aid of the Turbomole 7.2 suite of programs.<sup>1</sup> The PBE functional,<sup>2</sup> and the TZVP<sup>3</sup> basis set has been employed. The resolution of identity (RI),<sup>4</sup> along with the multipole accelerated resolution of identity (marij)<sup>5</sup> approximations have been used for an accurate and efficient treatment of the electronic Coulomb term in the DFT calculations. Solvent effects were introduced by using the COSMO model<sup>6</sup> with the dielectric constant  $\epsilon = 2.38$  for toluene. The option “disp” provided in the Turbomole package (DFT-D3) was employed for dispersion-corrected DFT calculations.<sup>7</sup> The values reported are  $\Delta G$  values, with zero point energy corrections, internal energy and entropic contributions included through frequency calculations on the optimized minima with the temperature taken to be 298.15 K. Harmonic frequency calculations were performed for all stationary points to confirm them as local minima.

#### References and notes:

1. TURBOMOLE V **7.0** 2015, a development of University of Karlsruhe and Forschungszentrum Karlsruhe GmbH, 1989-2007, TURBOMOLE GmbH, since 2007; available from <http://www.turbomole.com>.
2. J. P. Perdew, K. Burke and M. Ernzerhof, *Phys. Rev. Lett.* 1996, **77**, 3865.
3. S. Ansgar, H. Christian and A. Reinhart, *J. Chem. Phys.* 1994, **100**, 5829.
4. K. Eichkorn, O. Treutler, H. Öhm, M. Haser and R. Ahlrichs, *Chem. Phys. Lett.* 1995, **240**, 283.
5. M. Sierka, A. Hogekamp and R. Ahlrichs, *J. Chem. Phys.* 2003, **118**, 9136.
6. A. Klamt and G. Schuurmann, *J. Chem. Soc. Perkin Trans.*, 1993, **2**, 799-805.
7. S. Grimme, *J. Comput. Chem.* 2004, **25**, 1463.

**XYZ coordinates for optimized geometries of all the compounds at PBE/TZVP level of theory.**

**T0**

|    |           |           |           |          |           |           |           |
|----|-----------|-----------|-----------|----------|-----------|-----------|-----------|
| 38 |           |           | C         | 0.551486 | 8.846495  | 1.941833  |           |
| O  | -0.416898 | -2.717829 | -1.487655 | C        | 0.241778  | 10.127194 | 1.469982  |
| C  | -0.115974 | -1.316846 | -1.430287 | C        | -0.416737 | 10.279274 | 0.244482  |
| C  | -0.141249 | -0.689150 | -2.794112 | C        | -0.769251 | 9.158266  | -0.515232 |
| C  | 0.749653  | -1.450979 | -3.791797 | H        | -1.182654 | -0.699815 | -3.163769 |
| C  | 0.381110  | -2.937227 | -3.796693 | H        | 0.168214  | 0.361013  | -2.706371 |
| C  | 0.444169  | -3.498971 | -2.389911 | H        | 1.469995  | -3.465354 | -1.985857 |
| C  | 0.088052  | -0.759365 | -0.232504 | H        | 0.062087  | -4.524573 | -2.322854 |
| Ag | 0.370742  | 1.248730  | 0.094947  | H        | 1.068514  | -3.516613 | -4.432383 |
| O  | -1.282382 | -3.725228 | 0.626926  | H        | -0.635409 | -3.077864 | -4.199715 |
| S  | -1.024130 | -5.291000 | 0.806155  | H        | 1.806802  | -1.333032 | -3.499383 |
| O  | -0.888204 | -5.974358 | -0.502987 | H        | 0.639550  | -1.019242 | -4.797482 |
| O  | -1.929896 | -5.799091 | 1.854795  | H        | 0.065567  | -1.398926 | 0.655993  |
| C  | 0.739013  | -5.269378 | 1.566820  | H        | -0.882490 | -3.338217 | -0.294646 |
| F  | 1.594616  | -4.720754 | 0.682815  | H        | 0.438723  | 6.705956  | 1.543371  |
| F  | 1.118032  | -6.527529 | 1.832576  | H        | -0.661006 | 11.275833 | -0.127817 |
| F  | 0.746990  | -4.548067 | 2.696055  | H        | 1.064301  | 8.722569  | 2.897336  |
| F  | -0.786397 | 6.797410  | -0.753288 | H        | 0.512984  | 11.005819 | 2.057418  |
| C  | -0.446439 | 7.899397  | -0.017903 | H        | -1.283026 | 9.251287  | -1.472889 |
| C  | 0.207753  | 7.713759  | 1.196023  |          |           |           |           |

**T0'**

|    |            |           |            |   |            |           |           |
|----|------------|-----------|------------|---|------------|-----------|-----------|
| 38 |            |           |            |   |            |           |           |
| H  | -19.275972 | -5.203827 | -10.754047 | C | -19.290049 | -5.005425 | -7.434785 |
| C  | -18.602067 | -5.821057 | -10.132325 | H | -18.578479 | -5.592851 | -6.830320 |
| H  | -17.969005 | -6.408271 | -10.811584 | H | -19.820343 | -4.294844 | -6.789090 |
| C  | -17.721670 | -4.909782 | -9.325908  | C | -20.232352 | -5.902041 | -8.214977 |
| O  | -18.507593 | -4.168831 | -8.360057  | H | -20.770821 | -6.543726 | -7.500067 |

|           |            |           |            |           |            |           |            |
|-----------|------------|-----------|------------|-----------|------------|-----------|------------|
| H         | -20.983838 | -5.278768 | -8.726632  | 17        |            |           |            |
| C         | -19.454778 | -6.738640 | -9.235661  | C         | 0.096050   | 1.173950  | -4.879263  |
| H         | -18.793782 | -7.446357 | -8.707186  | C         | 0.020407   | 1.084053  | -3.377988  |
| H         | -20.143588 | -7.333343 | -9.853682  | C         | 0.189619   | -0.068478 | -2.698969  |
| C         | -16.407854 | -4.679350 | -9.415634  | O         | 0.527179   | -1.265594 | -3.300902  |
| H         | -15.991755 | -3.962816 | -8.696794  | C         | 0.978100   | -1.150847 | -4.673018  |
| H         | -17.918033 | -3.076843 | -7.831422  | C         | 0.080557   | -0.232662 | -5.490588  |
| F         | -16.138166 | -9.131578 | -13.680262 | C         | 0.033040   | -0.240774 | -1.221065  |
| C         | -15.355238 | -8.074149 | -13.342115 | H         | -0.221228  | 1.980917  | -2.804533  |
| C         | -14.476176 | -8.210486 | -12.276647 | H         | 2.014173   | -0.766325 | -4.663856  |
| H         | -14.416463 | -9.150644 | -11.728324 | H         | 0.987206   | -2.178482 | -5.059003  |
| C         | -15.473211 | -6.896478 | -14.085663 | H         | 0.424689   | -0.221931 | -6.535703  |
| C         | -14.666029 | -5.812657 | -13.748718 | H         | -0.943630  | -0.639276 | -5.483971  |
| H         | -14.732380 | -4.887881 | -14.323008 | H         | 1.005787   | 1.717099  | -5.194682  |
| C         | -13.744113 | -5.909530 | -12.680814 | H         | -0.752325  | 1.764334  | -5.263692  |
| H         | -12.893899 | -7.233584 | -11.172398 | H         | -0.725692  | -1.008877 | -1.002028  |
| C         | -13.657253 | -7.114347 | -11.943264 | H         | 0.977121   | -0.575960 | -0.763191  |
| H         | -13.026322 | -5.105279 | -12.506050 | H         | -0.275626  | 0.700696  | -0.749985  |
| Ag        | -15.143501 | -5.494034 | -10.826869 | <b>T'</b> |            |           |            |
| O         | -17.393353 | -2.160685 | -7.478954  | 21        |            |           |            |
| F         | -15.774350 | -2.210386 | -4.895013  | F         | -13.945875 | -5.547477 | -9.139749  |
| C         | -17.091875 | -2.445426 | -4.806497  | C         | -14.800869 | -4.545765 | -8.821436  |
| F         | -17.315534 | -3.768401 | -4.940410  | C         | -15.318347 | -3.761682 | -9.843057  |
| O         | -19.460705 | -1.874759 | -6.024237  | H         | -15.045766 | -3.954384 | -10.880746 |
| F         | -17.539309 | -2.039440 | -3.608476  | C         | -15.123732 | -4.351391 | -7.473771  |
| S         | -18.032927 | -1.499742 | -6.186486  | C         | -16.007459 | -3.331694 | -7.135736  |
| O         | -17.596906 | -0.090812 | -6.092659  | H         | -16.280128 | -3.172824 | -6.091978  |
| H         | -16.185729 | -6.843234 | -14.909339 | C         | -16.578700 | -2.513958 | -8.141877  |
| <b>T2</b> |            |           |            | H         | -16.749652 | -2.199543 | -10.299262 |
|           |            |           |            | C         | -16.225152 | -2.733436 | -9.503978  |

|          |            |            |           |           |            |            |           |
|----------|------------|------------|-----------|-----------|------------|------------|-----------|
| H        | -17.387253 | -1.824249  | -7.889778 | H         | -16.817629 | -15.163553 | 2.891306  |
| Ag       | -14.900018 | -1.018523  | -8.631149 | H         | -13.603008 | -13.297164 | 4.012128  |
| O        | -13.405966 | 0.504582   | -8.362987 | H         | -14.400666 | -11.714055 | 3.752450  |
| F        | -14.254106 | 0.322043   | -5.497586 | H         | -14.816919 | -12.724708 | 5.170445  |
| C        | -13.022253 | 0.838605   | -5.716883 | <b>4'</b> |            |            |           |
| F        | -13.123121 | 2.176565   | -5.800209 | 42        |            |            |           |
| O        | -11.033358 | 0.844520   | -7.578197 | C         | -16.722440 | -17.716602 | 4.053633  |
| F        | -12.230430 | 0.520713   | -4.677658 | C         | -15.699825 | -17.002181 | 4.722203  |
| S        | -12.303747 | 0.111904   | -7.340424 | C         | -14.937603 | -17.654644 | 5.731823  |
| O        | -12.257098 | -1.364216  | -7.098107 | C         | -15.199879 | -19.003208 | 6.057306  |
| H        | -14.678864 | -4.994268  | -6.713867 | C         | -16.213053 | -19.656271 | 5.374919  |
| <b>4</b> |            |            |           | C         | -16.979089 | -19.045122 | 4.374360  |
| 21       |            |            |           | Ag        | -16.566465 | -16.308055 | 6.800808  |
| C        | -16.746530 | -17.710864 | 4.079011  | O         | -17.242763 | -18.686954 | 8.866115  |
| C        | -15.725709 | -16.992157 | 4.739729  | S         | -16.091822 | -17.968647 | 9.507038  |
| C        | -14.969026 | -17.659221 | 5.727228  | O         | -14.780549 | -18.685475 | 9.530810  |
| C        | -15.217828 | -18.995315 | 6.043235  | F         | -16.476228 | -20.953225 | 5.678483  |
| C        | -16.231707 | -19.692577 | 5.378324  | O         | -18.221917 | -14.790619 | 6.953063  |
| C        | -16.994079 | -19.044074 | 4.395919  | C         | -19.162096 | -14.751040 | 7.789906  |
| C        | -15.415286 | -15.595731 | 4.449527  | C         | -19.420825 | -15.904194 | 8.716021  |
| C        | -16.008417 | -14.796885 | 3.529473  | C         | -19.954609 | -13.533615 | 7.843096  |
| C        | -15.646273 | -13.392188 | 3.284615  | C         | -20.957733 | -13.309432 | 8.732948  |
| C        | -14.548490 | -12.741620 | 4.102987  | C         | -21.753215 | -12.099276 | 8.870975  |
| O        | -16.247387 | -12.750905 | 2.411313  | C         | -22.722030 | -12.047035 | 9.898403  |
| H        | -14.620176 | -19.493743 | 6.808645  | C         | -23.509204 | -10.911336 | 10.083440 |
| H        | -16.429630 | -20.737962 | 5.622906  | C         | -23.346301 | -9.805219  | 9.241933  |
| H        | -17.786402 | -19.585442 | 3.875437  | C         | -22.391567 | -9.842360  | 8.215732  |
| H        | -17.350822 | -17.222257 | 3.312743  | C         | -21.601906 | -10.973294 | 8.030425  |
| H        | -14.176629 | -17.115120 | 6.247124  | C         | -16.581530 | -17.814054 | 11.353440 |
| H        | -14.607009 | -15.175789 | 5.057984  | F         | -16.719269 | -19.039869 | 11.898194 |

|            |            |            |           |   |            |           |            |
|------------|------------|------------|-----------|---|------------|-----------|------------|
| O          | -16.004074 | -16.499761 | 9.086629  | C | -15.718390 | -8.230617 | -8.990626  |
| F          | -17.755467 | -17.155205 | 11.482408 | F | -15.565493 | -9.459121 | -9.523151  |
| F          | -15.634792 | -17.140983 | 12.036936 | O | -14.160971 | -4.276064 | -8.570985  |
| H          | -14.634903 | -19.515416 | 6.834908  | C | -14.742462 | -3.100549 | -8.746716  |
| H          | -14.057747 | -17.167809 | 6.157517  | C | -15.775421 | -2.952962 | -9.635802  |
| H          | -15.398348 | -16.017903 | 4.358418  | C | -16.263534 | -4.132587 | -10.442730 |
| H          | -17.297849 | -17.225618 | 3.268029  | C | -15.790094 | -4.019222 | -11.887581 |
| H          | -17.759165 | -19.613802 | 3.867847  | C | -14.848929 | -4.928219 | -12.392184 |
| H          | -24.250897 | -10.887552 | 10.883681 | C | -14.378090 | -4.819508 | -13.705264 |
| H          | -23.962001 | -8.914990  | 9.383439  | C | -14.848317 | -3.799825 | -14.537696 |
| H          | -22.265183 | -8.979966  | 7.558108  | C | -15.789120 | -2.886726 | -14.045150 |
| H          | -20.863688 | -10.983710 | 7.227084  | C | -16.251390 | -2.994533 | -12.731490 |
| H          | -22.847830 | -12.911069 | 10.554715 | C | -14.227172 | -1.936027 | -7.934930  |
| H          | -21.208487 | -14.101746 | 9.445490  | C | -17.794762 | -4.377387 | -10.390276 |
| H          | -19.657398 | -12.772060 | 7.117819  | C | -18.259114 | -5.499417 | -11.380703 |
| H          | -20.489007 | -16.054224 | 8.916623  | C | -19.666744 | -6.022444 | -11.059467 |
| H          | -18.989855 | -16.827818 | 8.309363  | C | -20.416675 | -5.032389 | -10.189658 |
| H          | -18.921234 | -15.709012 | 9.678416  | O | -19.645225 | -4.850163 | -8.939801  |
| <b>T2a</b> |            |            |           | C | -18.373063 | -4.615227 | -9.041155  |
| 59         |            |            |           | C | -17.636650 | -4.561023 | -7.793758  |
| C          | -11.904320 | -4.072698  | -3.808188 | O | -13.939791 | -8.555272 | -6.988951  |
| C          | -10.803185 | -4.485261  | -4.562759 | O | -16.342946 | -9.307818 | -6.596728  |
| C          | -10.822692 | -5.607951  | -5.379350 | F | -16.986649 | -7.809444 | -9.257136  |
| C          | -12.001848 | -6.376282  | -5.431301 | F | -14.864649 | -7.386356 | -9.610153  |
| C          | -13.137328 | -5.993437  | -4.669491 | H | -21.391424 | -5.387992 | -9.843633  |
| C          | -13.072602 | -4.829377  | -3.865698 | H | -20.524346 | -4.042300 | -10.657119 |
| F          | -9.664383  | -3.742863  | -4.501823 | H | -19.615660 | -6.979119 | -10.518560 |
| Ag         | -13.645570 | -5.161493  | -6.741383 | H | -20.250682 | -6.196166 | -11.973959 |
| O          | -15.776116 | -6.839881  | -6.691579 | H | -18.211553 | -5.074899 | -12.390002 |
| S          | -15.406287 | -8.254273  | -7.098420 | H | -17.524624 | -6.314235 | -11.335168 |

|            |            |           |            |    |           |           |           |
|------------|------------|-----------|------------|----|-----------|-----------|-----------|
| H          | -18.320677 | -3.450004 | -10.711155 | C  | -3.309814 | 3.067252  | -2.117227 |
| H          | -17.005288 | -3.647217 | -7.825802  | C  | -4.071869 | 4.064298  | -1.502688 |
| H          | -18.288283 | -4.622985 | -6.916945  | C  | -4.501787 | 3.888304  | -0.181656 |
| H          | -16.185565 | -1.961349 | -9.841689  | C  | -4.165518 | 2.726928  | 0.517042  |
| H          | -16.975493 | -2.264760 | -12.357590 | C  | -2.786633 | -2.450488 | 1.423958  |
| H          | -16.159751 | -2.084563 | -14.687318 | C  | -2.240883 | 0.752757  | 1.970082  |
| H          | -14.483904 | -3.714425 | -15.563370 | C  | -0.781927 | 0.961131  | 1.666799  |
| H          | -13.642950 | -5.536369 | -14.077753 | C  | -0.334099 | 2.282848  | 1.132383  |
| H          | -14.478780 | -5.726476 | -11.743994 | O  | 0.001042  | 0.008500  | 1.833527  |
| H          | -16.887526 | -5.382194 | -7.760058  | Ag | 1.995802  | -0.343482 | 0.827639  |
| H          | -15.775131 | -5.022804 | -10.015688 | O  | 1.490837  | 0.605164  | -1.235259 |
| H          | -9.938603  | -5.888885 | -5.952523  | S  | 0.440488  | -0.097073 | -2.099873 |
| H          | -12.022252 | -7.314510 | -5.989226  | O  | -0.110103 | 0.771799  | -3.180990 |
| H          | -13.992322 | -6.667590 | -4.590861  | C  | 4.978344  | -0.059296 | 0.204323  |
| H          | -13.937721 | -4.538079 | -3.269174  | C  | 5.388536  | 0.808931  | 1.202828  |
| H          | -11.832899 | -3.176915 | -3.190855  | C  | 5.047706  | 0.638876  | 2.550631  |
| H          | -14.743903 | -0.996431 | -8.174881  | C  | 4.253673  | -0.444838 | 2.908423  |
| H          | -14.357836 | -2.144870 | -6.858401  | C  | 3.804750  | -1.360907 | 1.927282  |
| H          | -13.147147 | -1.804476 | -8.106730  | C  | 4.172462  | -1.162730 | 0.566288  |
| <b>T2b</b> |            |           |            | F  | 6.163342  | 1.873155  | 0.866863  |
| 59         |            |           |            | C  | 1.492367  | -1.412290 | -3.015656 |
| C          | -3.972005  | -1.818608 | 1.445549   | F  | 0.726593  | -2.126434 | -3.862115 |
| C          | -4.279875  | -0.412341 | 0.978700   | F  | 2.048372  | -2.265367 | -2.118755 |
| C          | -5.265738  | -0.509410 | -0.216448  | F  | 2.485089  | -0.826188 | -3.714480 |
| C          | -6.288310  | -1.645046 | 0.003679   | O  | -0.536172 | -0.910570 | -1.305606 |
| C          | -6.361708  | -2.018605 | 1.476494   | H  | -7.057899 | -2.846882 | 1.661376  |
| O          | -5.071840  | -2.505825 | 1.932446   | H  | -6.678256 | -1.160618 | 2.096600  |
| C          | -3.034559  | 0.444368  | 0.653740   | H  | -5.990593 | -2.543814 | -0.558736 |
| C          | -3.400019  | 1.717451  | -0.090433  | H  | -7.287533 | -1.356268 | -0.353985 |
| C          | -2.981075  | 1.902207  | -1.416008  | H  | -5.772323 | 0.458795  | -0.333327 |



|            |            |           |            |    |            |           |            |
|------------|------------|-----------|------------|----|------------|-----------|------------|
| H          | -4.691946  | -0.685858 | -1.138937  | C  | -16.920443 | -7.729232 | -10.794948 |
| H          | -4.816441  | 0.084789  | 1.809035   | C  | -16.406843 | -6.521858 | -11.582918 |
| H          | -2.715377  | -3.489832 | 1.746102   | O  | -14.039679 | -4.158965 | -8.579765  |
| H          | -2.665355  | 1.645339  | 2.450532   | Ag | -13.775263 | -5.236954 | -6.601630  |
| H          | -4.509577  | 2.606182  | 1.548057   | C  | -15.486679 | -6.885121 | -4.951125  |
| H          | -5.099954  | 4.661101  | 0.306151   | C  | -16.758253 | -6.328299 | -5.052307  |
| H          | -4.328685  | 4.975386  | -2.047022  | C  | -16.921865 | -4.970736 | -4.760025  |
| H          | -2.963213  | 3.193733  | -3.145057  | C  | -15.868257 | -4.144401 | -4.396177  |
| H          | -2.380920  | 1.131214  | -1.903990  | C  | -14.579692 | -4.703739 | -4.309085  |
| H          | -1.877757  | -1.948335 | 1.100545   | C  | -14.377694 | -6.086088 | -4.571978  |
| H          | -2.390466  | -0.149965 | -0.013208  | F  | -18.166932 | -4.436544 | -4.854677  |
| H          | 5.278949   | 0.104959  | -0.830406  | C  | -15.133962 | -2.169395 | -7.868404  |
| H          | 3.962015   | -1.934349 | -0.177337  | C  | -15.953592 | -3.676093 | -12.583126 |
| H          | 3.315555   | -2.288188 | 2.232675   | C  | -15.080189 | -3.494202 | -13.663444 |
| H          | 3.989449   | -0.602865 | 3.954716   | C  | -15.550794 | -3.018938 | -14.893581 |
| H          | 5.407556   | 1.352682  | 3.292218   | C  | -16.906741 | -2.721172 | -15.058269 |
| H          | -2.324233  | -0.101390 | 2.653540   | C  | -17.788837 | -2.902549 | -13.985293 |
| H          | -0.647086  | 3.085893  | 1.816908   | C  | -17.313792 | -3.375507 | -12.760290 |
| H          | 0.750592   | 2.311722  | 0.975122   | O  | -13.334065 | -6.498579 | -9.847855  |
| H          | -0.847153  | 2.480172  | 0.175961   | S  | -12.474706 | -7.349297 | -8.945304  |
| <b>T2C</b> |            |           |            | O  | -12.201977 | -6.706870 | -7.589671  |
| 59         |            |           |            | C  | -13.627825 | -8.806526 | -8.477101  |
| C          | -16.492364 | -4.223584 | -8.427505  | F  | -13.022180 | -9.621789 | -7.590485  |
| C          | -15.268176 | -3.375653 | -8.786891  | F  | -13.952912 | -9.522619 | -9.571105  |
| C          | -15.361894 | -2.961771 | -10.257381 | F  | -14.766913 | -8.336217 | -7.915931  |
| C          | -15.440449 | -4.158709 | -11.230455 | O  | -11.287494 | -7.991210 | -9.574116  |
| C          | -16.259626 | -5.314443 | -10.690800 | H  | -18.395526 | -8.110504 | -9.223662  |
| C          | -16.749463 | -5.305539 | -9.433237  | H  | -18.850819 | -6.824560 | -10.385590 |
| O          | -17.510547 | -6.313609 | -8.881676  | H  | -16.100222 | -8.177106 | -10.216630 |
| C          | -18.010012 | -7.283145 | -9.833390  | H  | -17.316967 | -8.506427 | -11.465404 |

|           |            |           |            |          |            |           |            |
|-----------|------------|-----------|------------|----------|------------|-----------|------------|
| H         | -17.077305 | -6.293614 | -12.429941 | C        | -19.025715 | -4.725253 | -6.518710  |
| H         | -15.422489 | -6.750358 | -12.027342 | C        | -19.685616 | -5.874169 | -7.264905  |
| H         | -13.987351 | -4.922724 | -9.215994  | C        | -19.547103 | -5.645781 | -8.773478  |
| H         | -17.376590 | -3.573049 | -8.316045  | C        | -14.027474 | -4.087760 | -10.147160 |
| H         | -14.505746 | -2.323219 | -10.522421 | C        | -18.659700 | -4.158841 | -11.374109 |
| H         | -18.005554 | -3.529982 | -11.927341 | C        | -19.497289 | -4.604959 | -12.403807 |
| H         | -18.851002 | -2.677742 | -14.106595 | C        | -20.304233 | -3.704561 | -13.111398 |
| H         | -17.277058 | -2.354316 | -16.017758 | C        | -20.280262 | -2.343568 | -12.794227 |
| H         | -14.856094 | -2.885536 | -15.725726 | C        | -19.443942 | -1.888048 | -11.766268 |
| H         | -14.019984 | -3.731573 | -13.540188 | C        | -18.642015 | -2.789662 | -11.064799 |
| H         | -16.334879 | -4.693684 | -7.439603  | H        | -19.074608 | -4.850511 | -5.429214  |
| H         | -14.414198 | -4.537101 | -11.402765 | H        | -19.502649 | -3.765647 | -6.789598  |
| H         | -16.043873 | -3.090685 | -4.178832  | H        | -19.193642 | -6.816080 | -6.972989  |
| H         | -13.755429 | -4.093927 | -3.934769  | H        | -20.742332 | -5.947744 | -6.966322  |
| H         | -13.424340 | -6.559790 | -4.324587  | H        | -20.311937 | -4.931801 | -9.128607  |
| H         | -15.341937 | -7.947085 | -5.151811  | H        | -19.738991 | -6.585267 | -9.321262  |
| H         | -17.619450 | -6.924892 | -5.353093  | H        | -15.775941 | -3.226413 | -8.103893  |
| H         | -14.228435 | -1.598656 | -8.115726  | H        | -15.976113 | -4.896502 | -11.849298 |
| H         | -16.007281 | -1.512027 | -7.972131  | H        | -17.993084 | -2.436240 | -10.259413 |
| H         | -15.070574 | -2.490602 | -6.816832  | H        | -19.418190 | -0.825885 | -11.512422 |
| H         | -16.269627 | -2.347736 | -10.363346 | H        | -20.910104 | -1.639689 | -13.342393 |
| <b>T3</b> |            |           |            | H        | -20.953986 | -4.069245 | -13.910279 |
| 35        |            |           |            | H        | -19.520440 | -5.669734 | -12.652728 |
| C         | -15.900242 | -4.278734 | -8.426346  | H        | -15.224631 | -4.853631 | -7.764166  |
| C         | -15.463608 | -4.424599 | -9.859640  | H        | -17.983322 | -6.138367 | -10.998223 |
| C         | -16.322108 | -4.817730 | -10.813223 | H        | -13.345522 | -4.722405 | -9.556484  |
| C         | -17.778008 | -5.131774 | -10.581934 | H        | -13.786497 | -4.216133 | -11.211329 |
| C         | -18.168051 | -5.142627 | -9.119925  | H        | -13.805029 | -3.044360 | -9.865533  |
| C         | -17.310588 | -4.713731 | -8.172888  | <b>5</b> |            |           |            |
| O         | -17.614422 | -4.632475 | -6.826818  | 33       |            |           |            |

|   |            |           |            |                       |            |           |           |
|---|------------|-----------|------------|-----------------------|------------|-----------|-----------|
| C | -16.553635 | -4.642184 | -8.223386  | H                     | -11.806147 | -0.285928 | -7.866781 |
| C | -15.731527 | -4.413359 | -9.338638  | H                     | -12.675813 | 0.077819  | -9.369676 |
| C | -16.240577 | -4.687202 | -10.619626 | H                     | -13.577494 | -0.083441 | -7.851688 |
| C | -17.537502 | -5.183169 | -10.780916 | <b>H<sub>2</sub></b>  |            |           |           |
| C | -18.345527 | -5.415335 | -9.662266  | 2                     |            |           |           |
| C | -17.850658 | -5.140875 | -8.383225  | H                     | 0.000000   | 0.000000  | -0.001151 |
| C | -14.348640 | -3.878113 | -9.160500  | H                     | 0.000000   | 0.000000  | 0.751151  |
| C | -14.181472 | -2.518598 | -8.865096  | <b>H<sub>2</sub>O</b> |            |           |           |
| C | -12.904010 | -1.961895 | -8.692410  | 3                     |            |           |           |
| C | -11.795997 | -2.805598 | -8.796360  | O                     | -0.027895  | 0.000000  | -0.019709 |
| C | -11.955929 | -4.171228 | -9.071345  | H                     | 0.019953   | 0.000000  | 0.951352  |
| C | -13.231758 | -4.734905 | -9.276112  | H                     | 0.903612   | 0.000000  | -0.298306 |
| O | -10.790189 | -4.901366 | -9.139187  |                       |            |           |           |
| C | -10.933920 | -6.341414 | -9.116366  |                       |            |           |           |
| C | -12.040136 | -6.805651 | -10.047085 |                       |            |           |           |
| C | -13.373243 | -6.209875 | -9.588684  |                       |            |           |           |
| C | -12.731208 | -0.487686 | -8.425154  |                       |            |           |           |
| H | -9.949424  | -6.727465 | -9.409851  |                       |            |           |           |
| H | -11.142531 | -6.657532 | -8.078002  |                       |            |           |           |
| H | -11.805902 | -6.480468 | -11.073591 |                       |            |           |           |
| H | -12.080988 | -7.905017 | -10.049606 |                       |            |           |           |
| H | -13.730195 | -6.743723 | -8.690131  |                       |            |           |           |
| H | -14.147130 | -6.361497 | -10.354534 |                       |            |           |           |
| H | -10.783439 | -2.421149 | -8.652467  |                       |            |           |           |
| H | -15.066530 | -1.883354 | -8.778612  |                       |            |           |           |
| H | -16.167571 | -4.430772 | -7.223605  |                       |            |           |           |
| H | -18.475803 | -5.315404 | -7.504857  |                       |            |           |           |
| H | -19.357544 | -5.805927 | -9.787320  |                       |            |           |           |
| H | -17.919383 | -5.386280 | -11.783781 |                       |            |           |           |
| H | -15.613674 | -4.501430 | -11.495085 |                       |            |           |           |

## **14. $^1\text{H}$ , $^{13}\text{C}$ and 2D NMR Spectra**

$^1\text{H}$  NMR-Spectrum (400 MHz,  $\text{CDCl}_3$ ) of **S4**:

PRIMAR-1.ESP

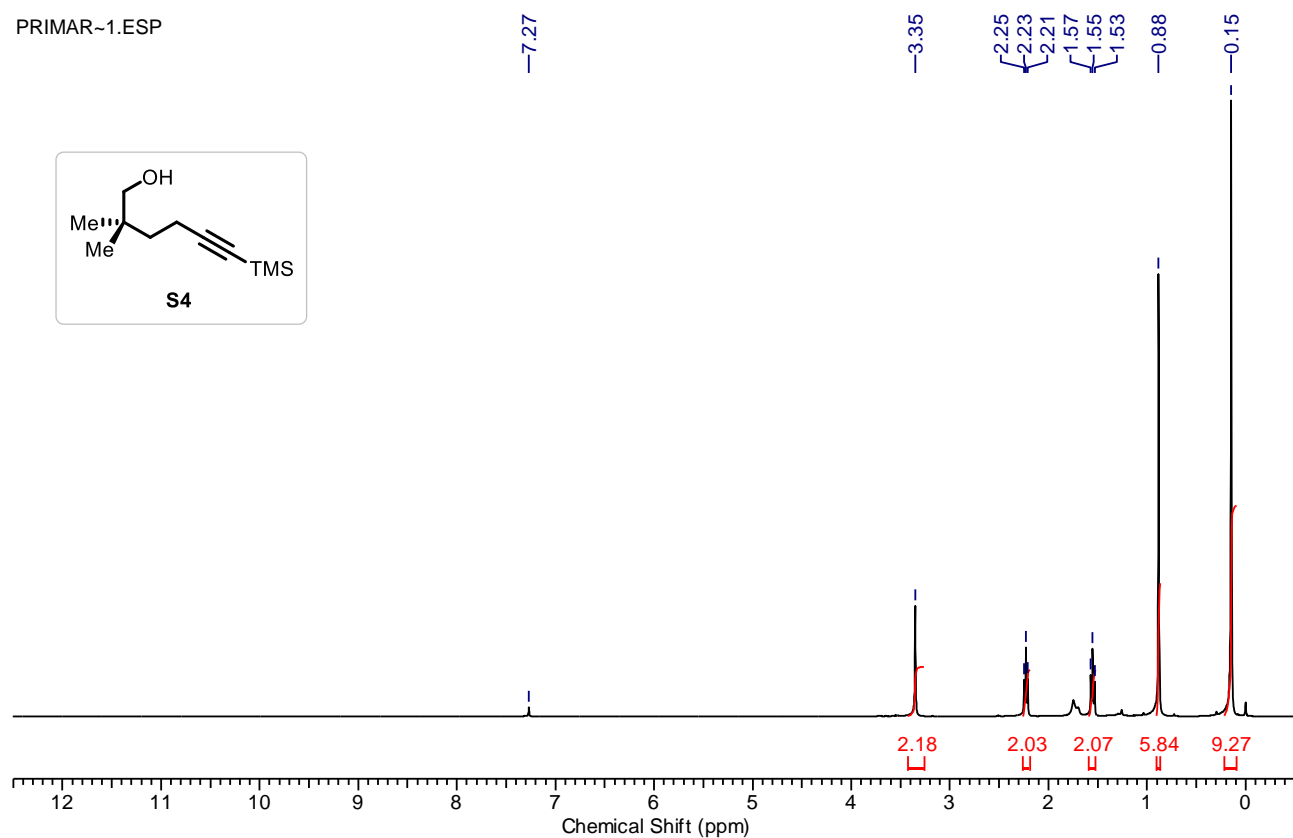 $^{13}\text{C}$  NMR-Spectrum (101 MHz,  $\text{CDCl}_3$ ) of **S4**:

Primary Dimethyl alcohol with TMS ST-10-018 AV-500-20190608-085604-11681-063-003-1.esp

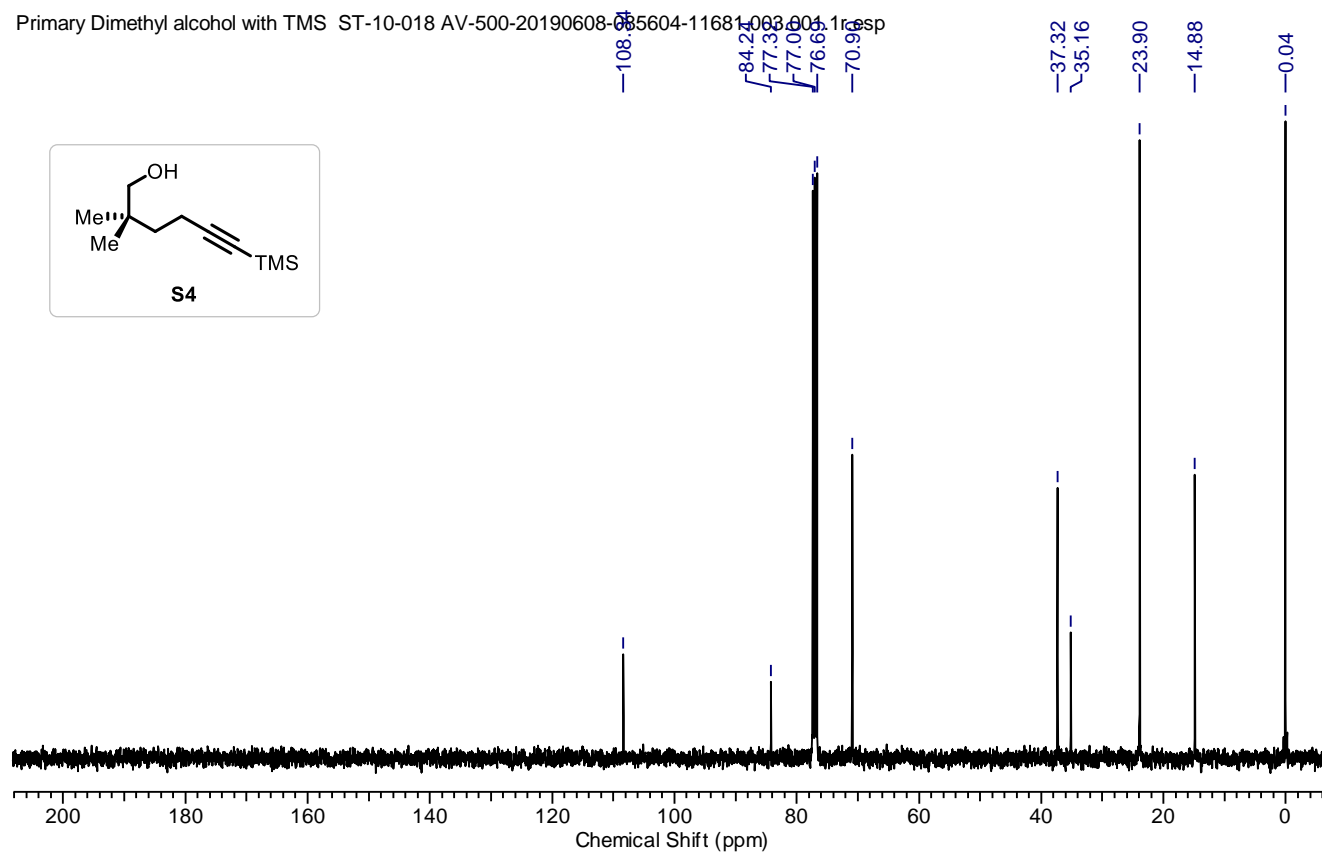

<sup>1</sup>H NMR-Spectrum (400 MHz, CDCl<sub>3</sub>) of **2c**:

ST-10-044-2 AV-400-20190715-100706-11681\_PROTON-3.jdf

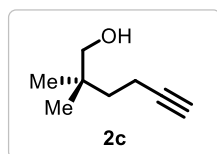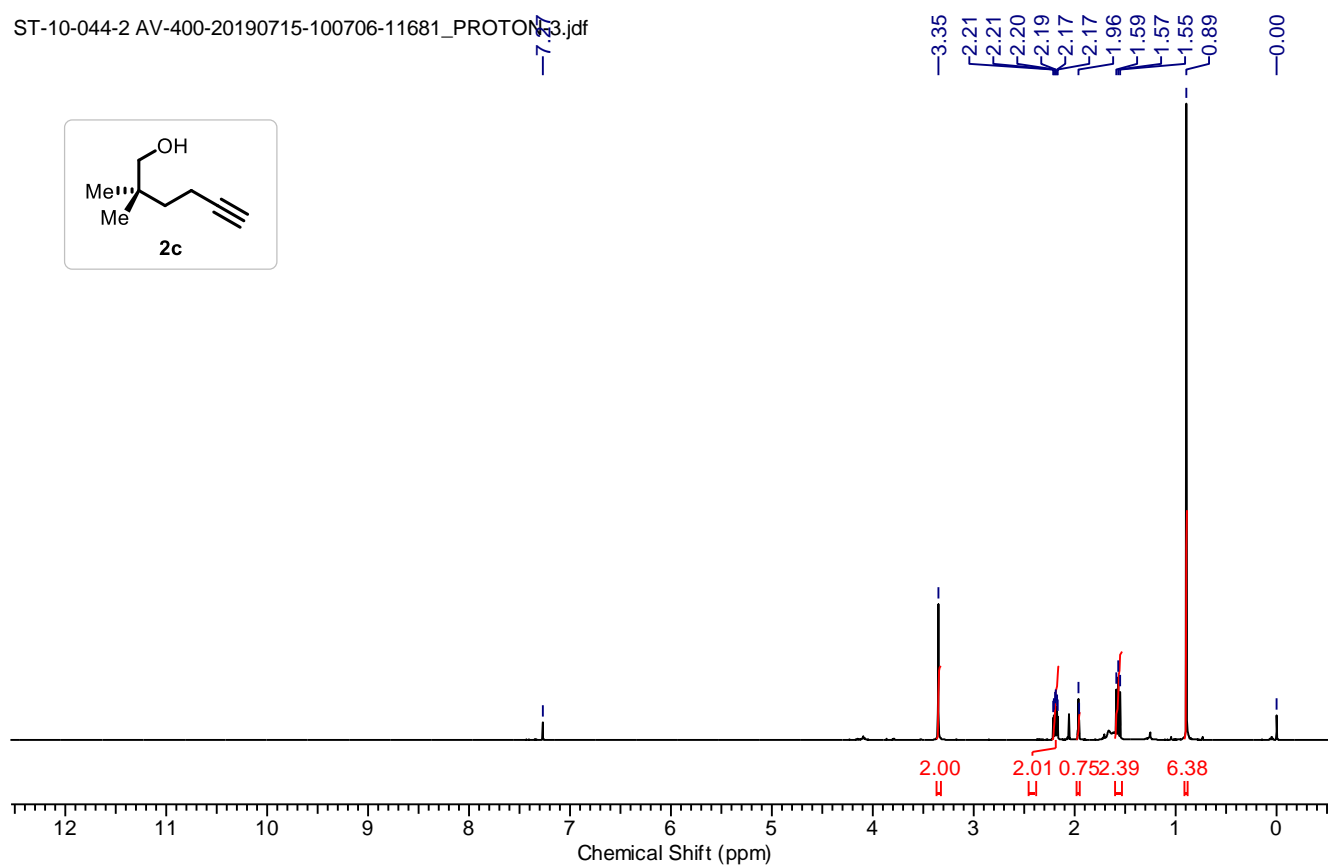<sup>13</sup>C NMR-Spectrum (101 MHz, CDCl<sub>3</sub>) of **2c**:

ST-10-044-2 AV-400-20190715-100706-11681\_CARBON-3.esp

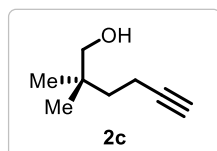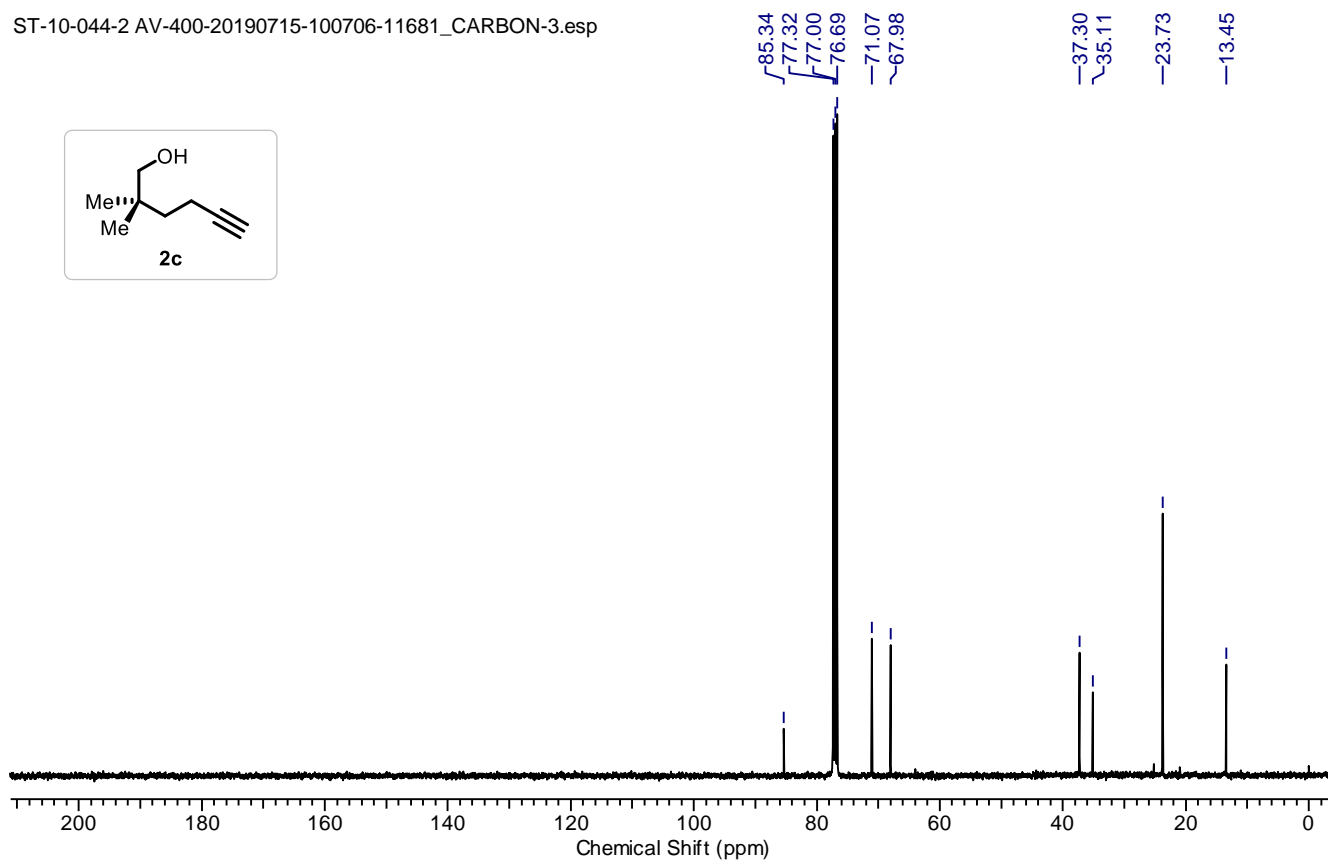

<sup>1</sup>H NMR-Spectrum (400 MHz, CDCl<sub>3</sub>) of **2g**: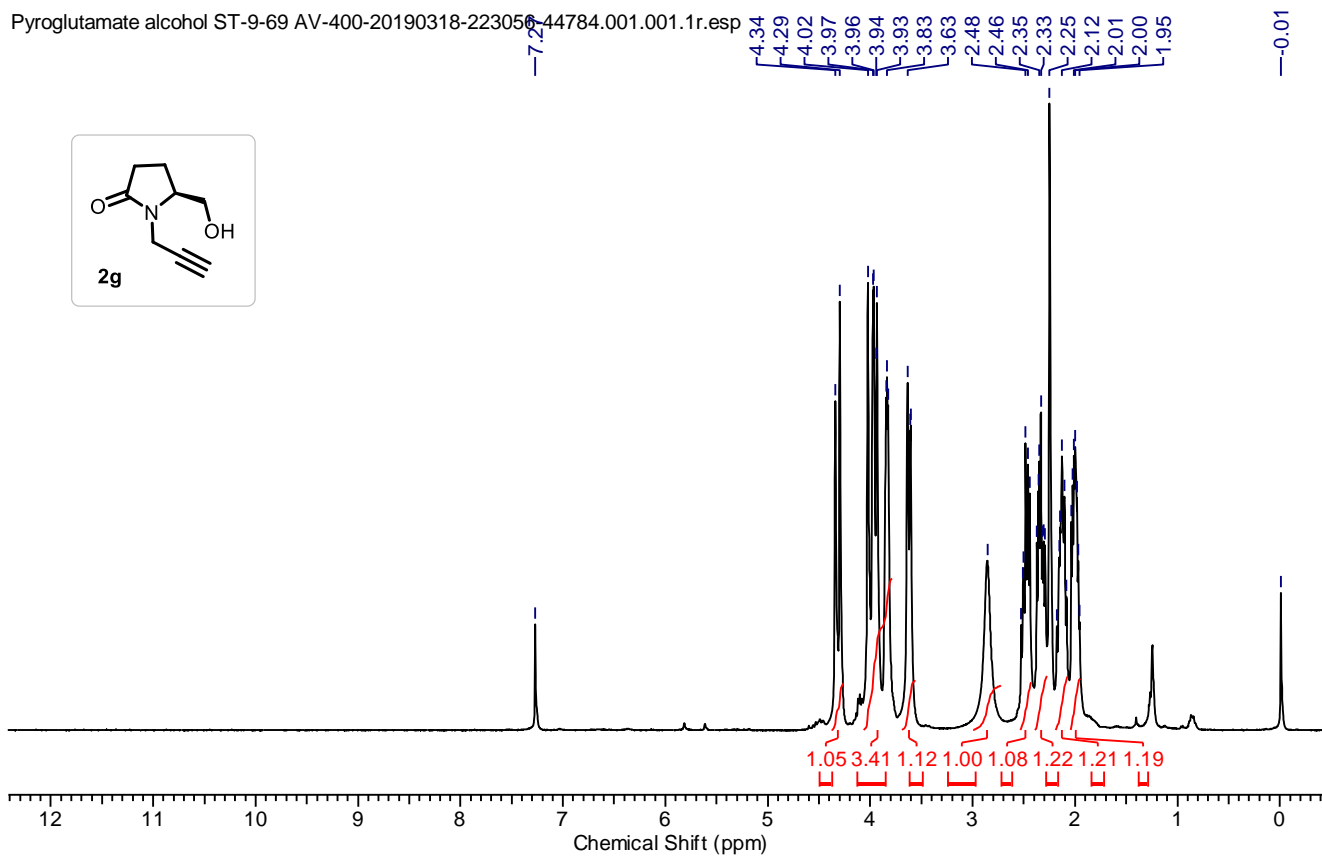<sup>13</sup>C NMR-Spectrum (101 MHz, CDCl<sub>3</sub>) of **2g**: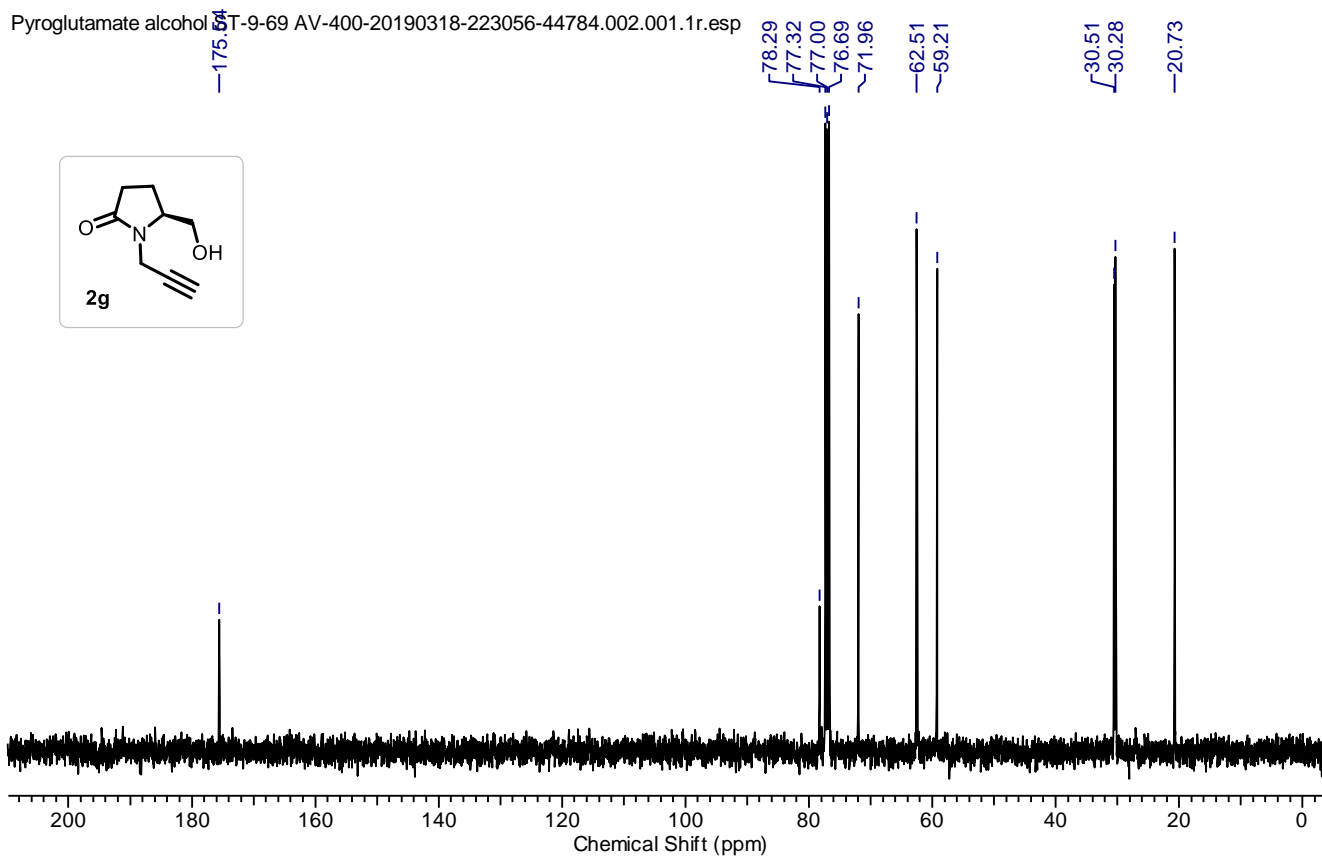

$^1\text{H}$  NMR-Spectrum (200 MHz,  $\text{CDCl}_3$ ) of **4o**: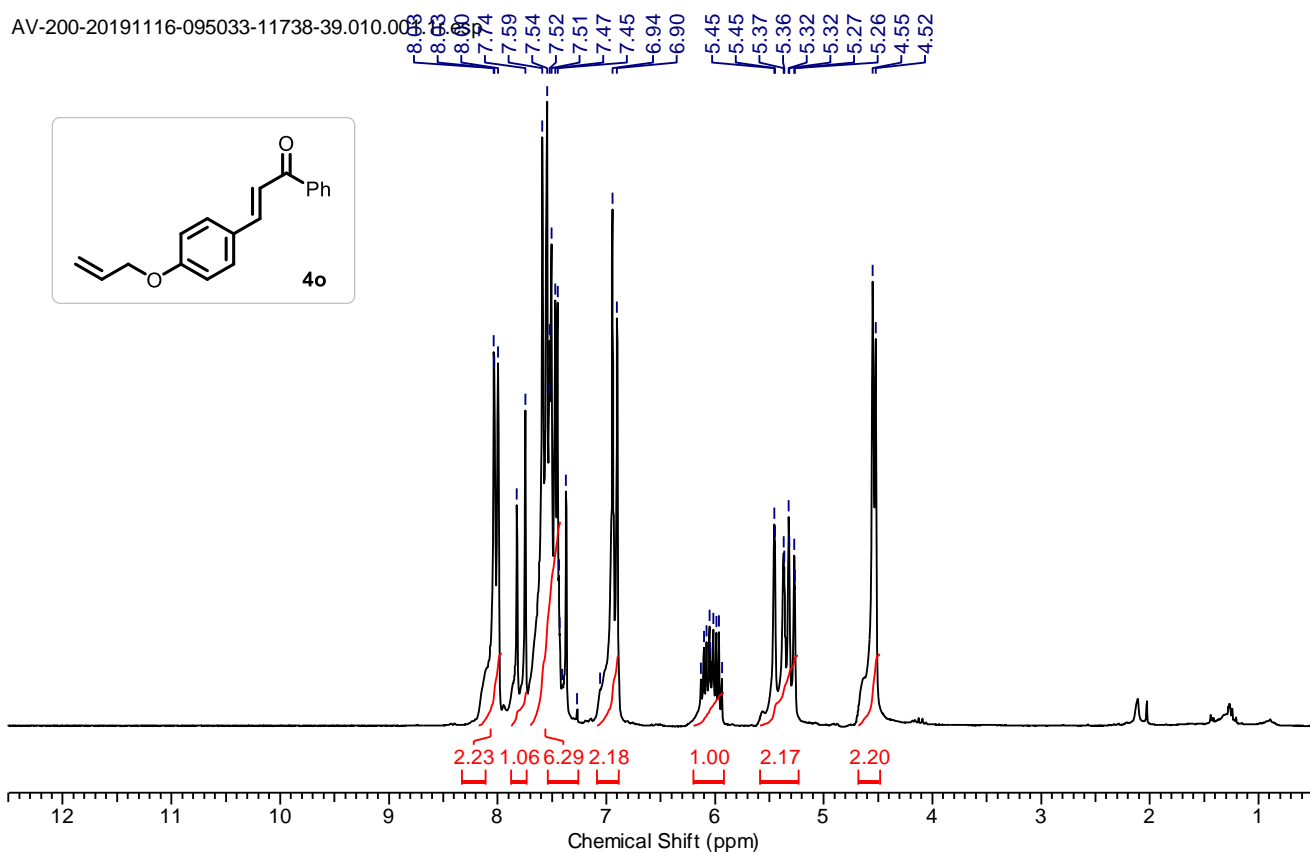 $^1\text{H}$  NMR-Spectrum (200 MHz,  $\text{CDCl}_3$ ) of **4p**: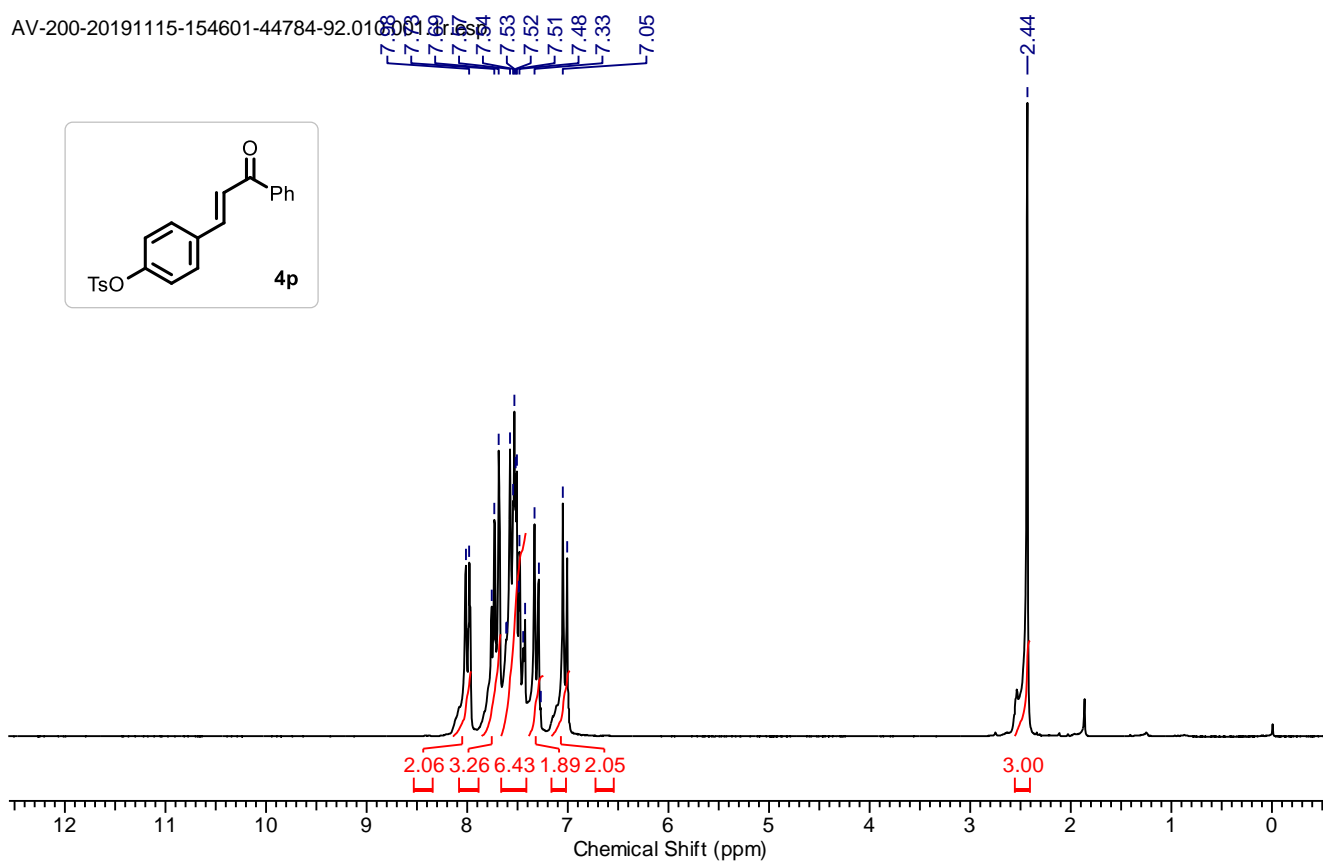



$^1\text{H}$  NMR-Spectrum (200 MHz,  $\text{CDCl}_3$ ) of **4q**: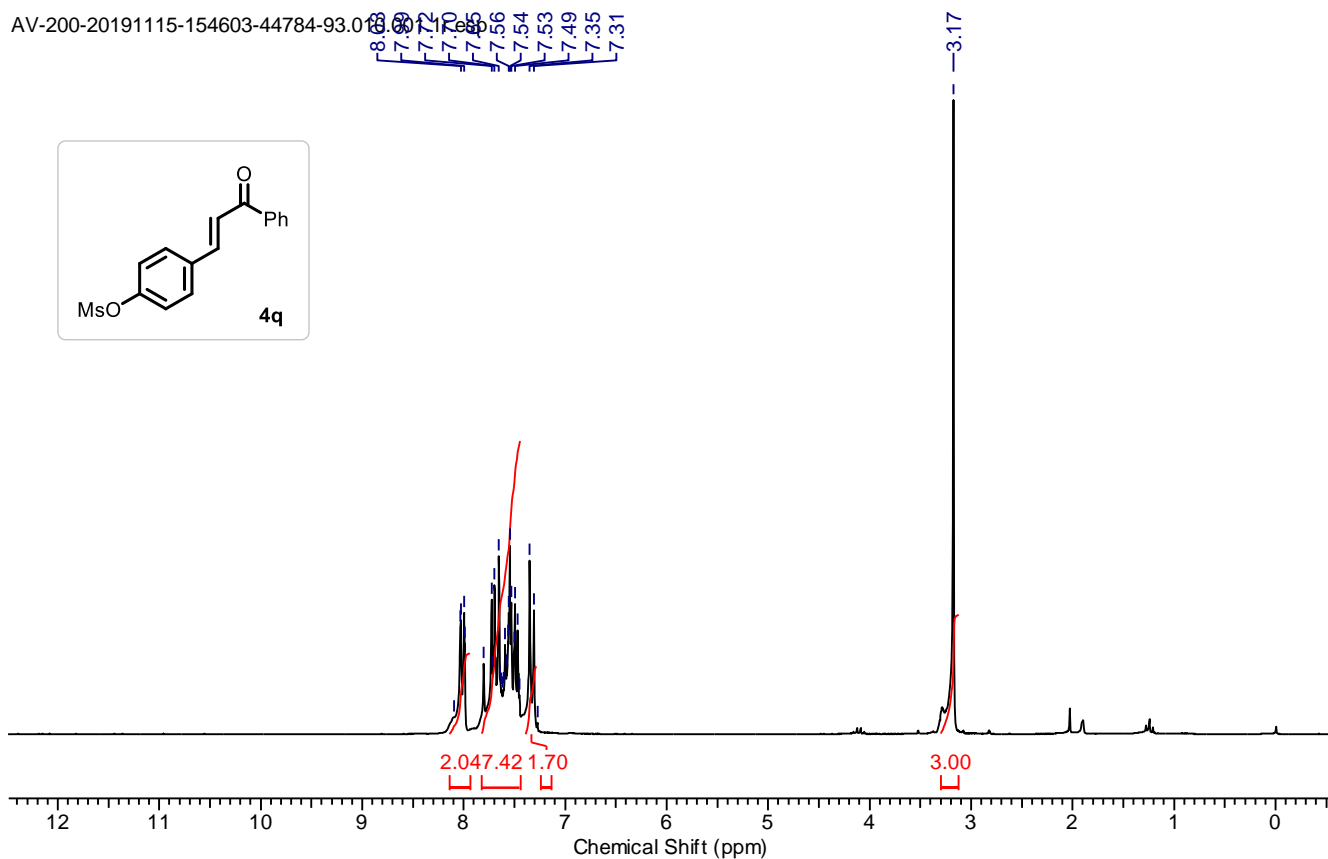 $^1\text{H}$  NMR-Spectrum (200 MHz,  $\text{CDCl}_3$ ) of **4r**: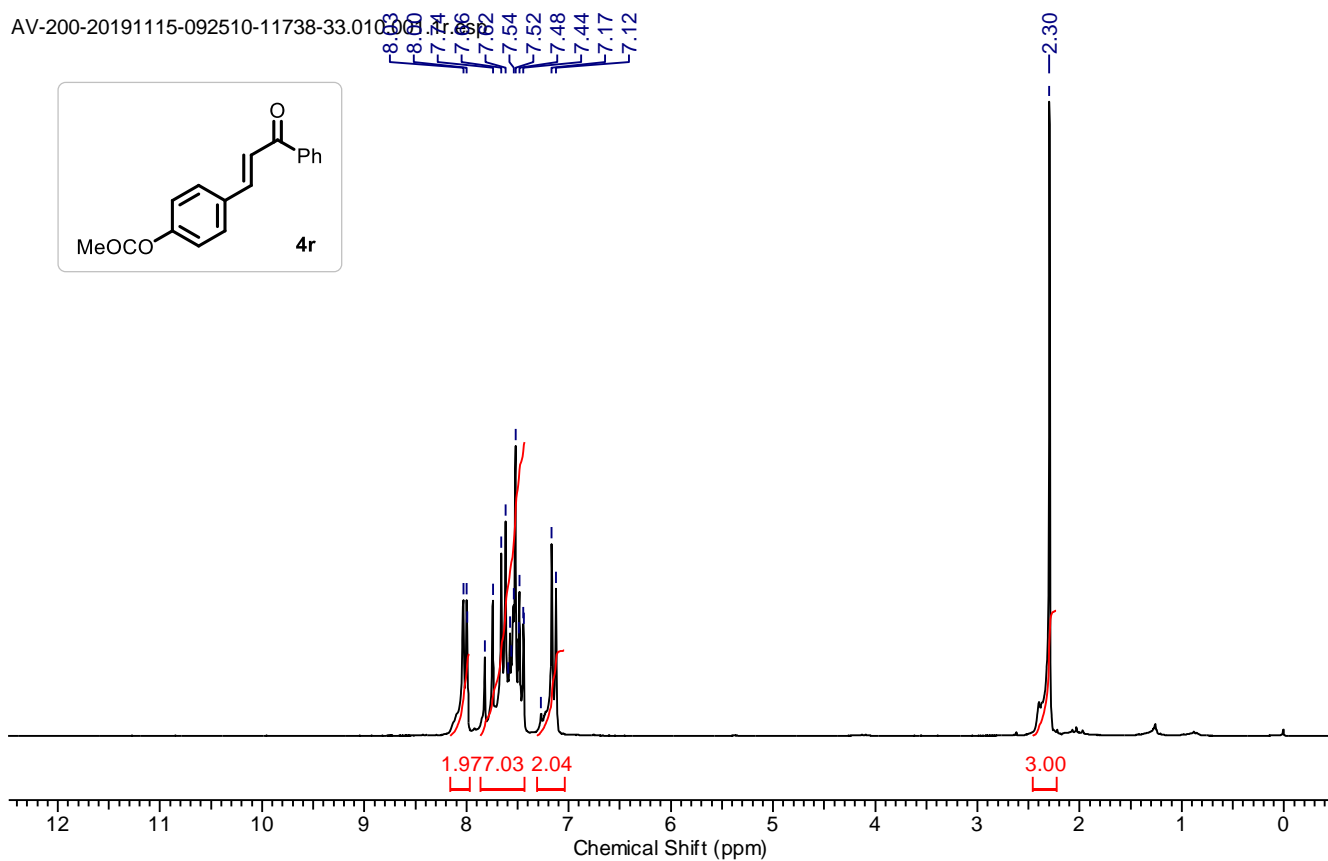

<sup>1</sup>H NMR-Spectrum (500 MHz, CDCl<sub>3</sub>) of **5aa**:

20180306-100822-11738.001.001.1r.esp

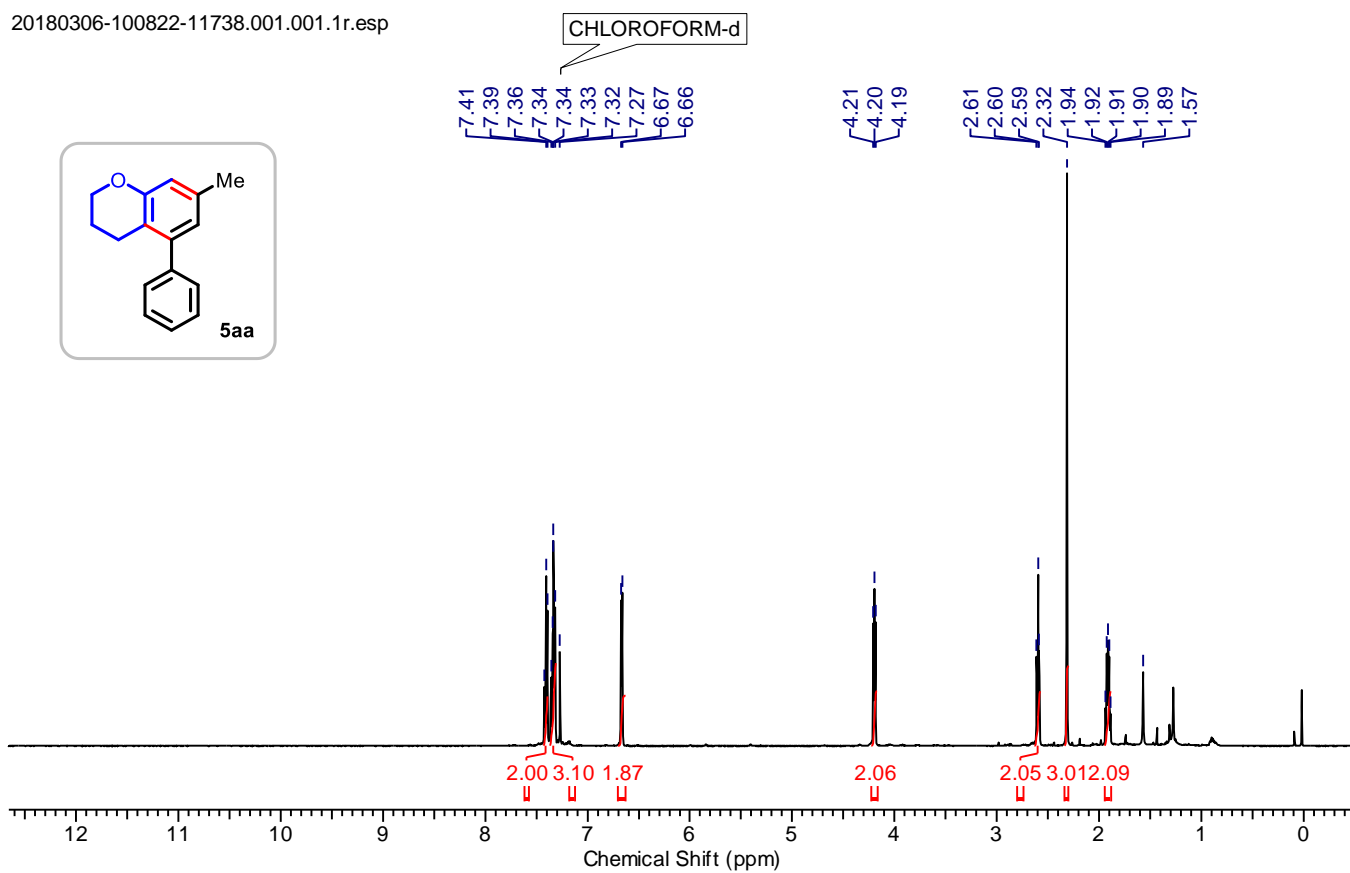<sup>13</sup>C NMR-Spectrum (126 MHz, CDCl<sub>3</sub>) of **5aa**:

20180306-100822-11738.003.001.1r.esp

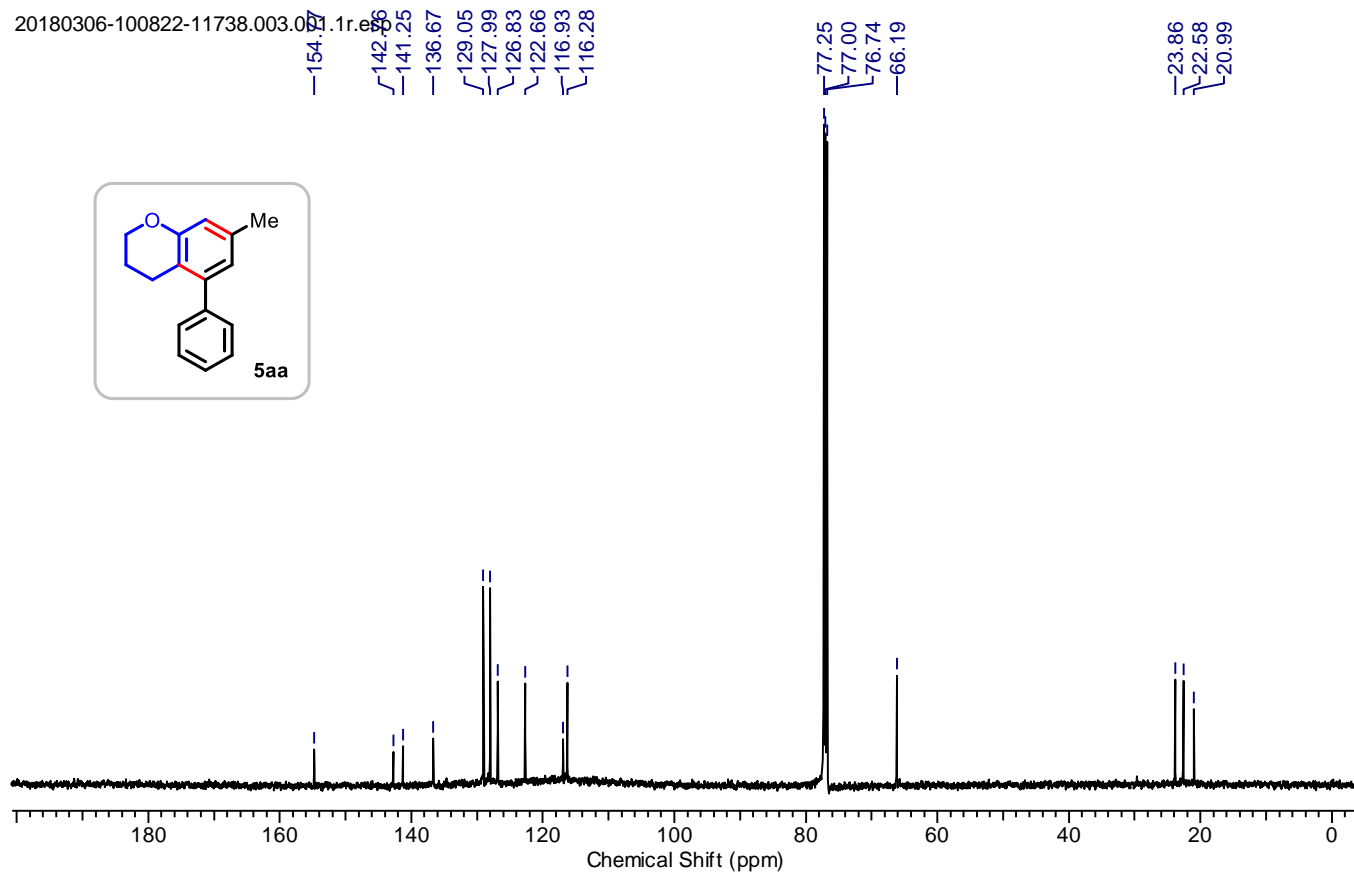

<sup>1</sup>H NMR-Spectrum (500 MHz, CDCl<sub>3</sub>) of **T3ab**: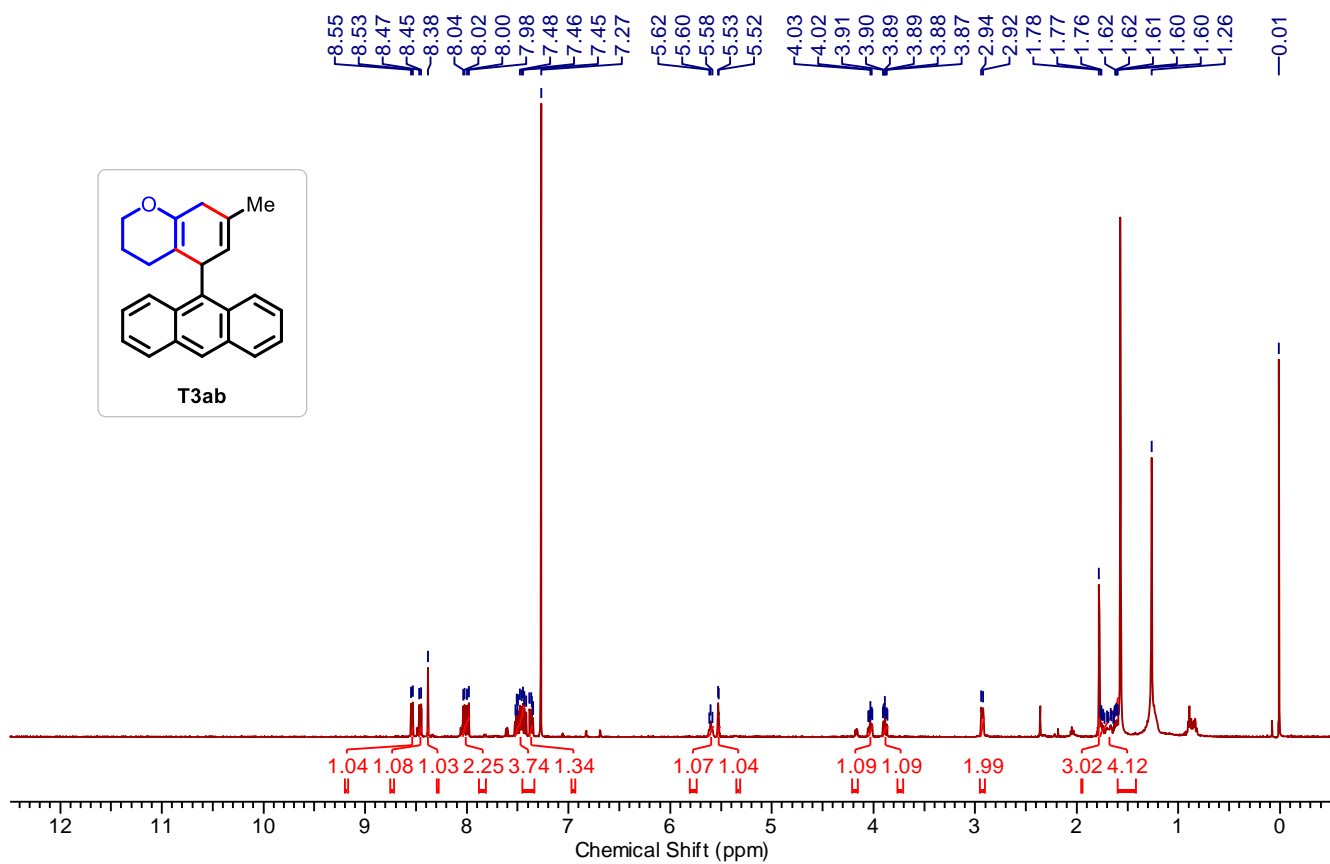<sup>13</sup>C NMR-Spectrum (126 MHz, CDCl<sub>3</sub>) of **T3ab**: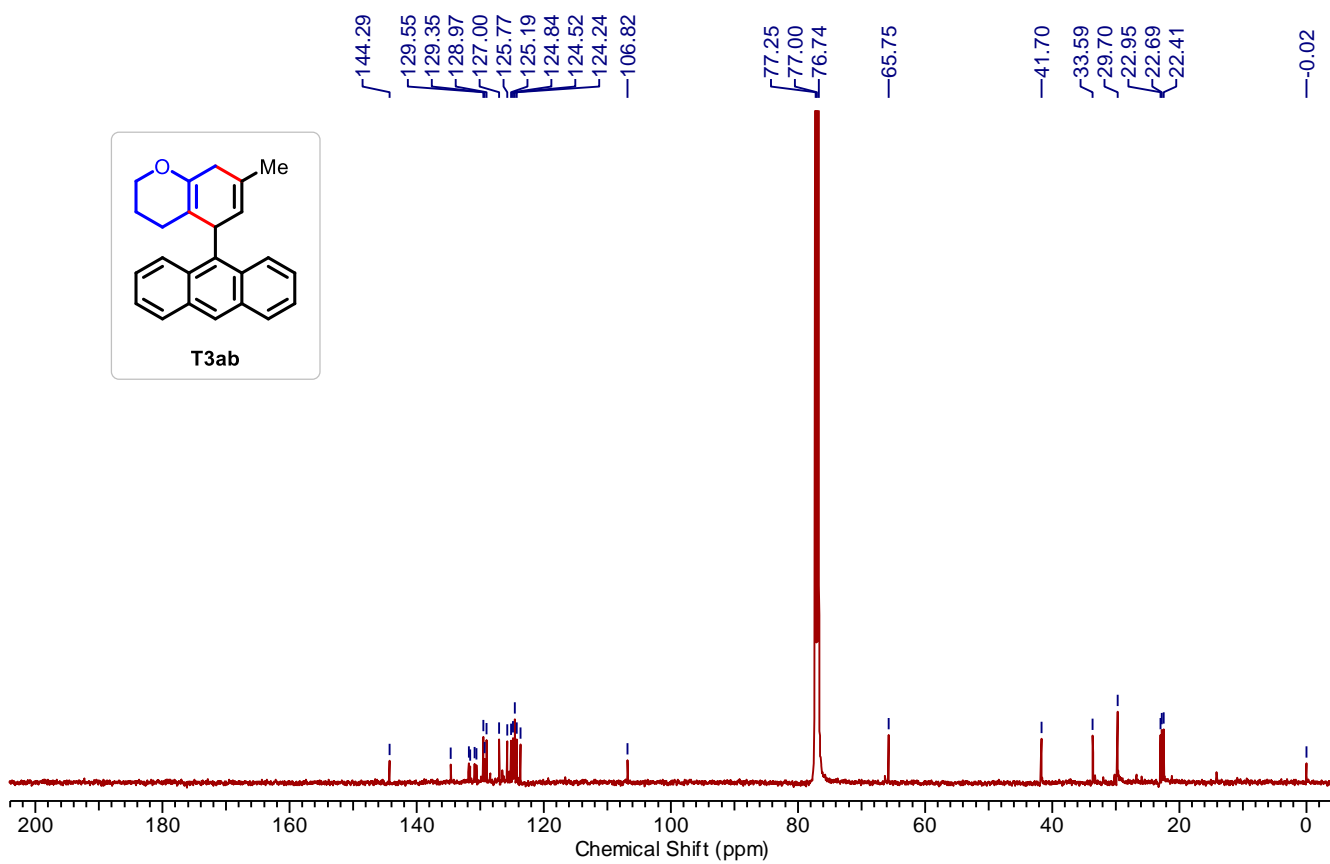

<sup>1</sup>H NMR-Spectrum (500 MHz, CDCl<sub>3</sub>) of **5ab**: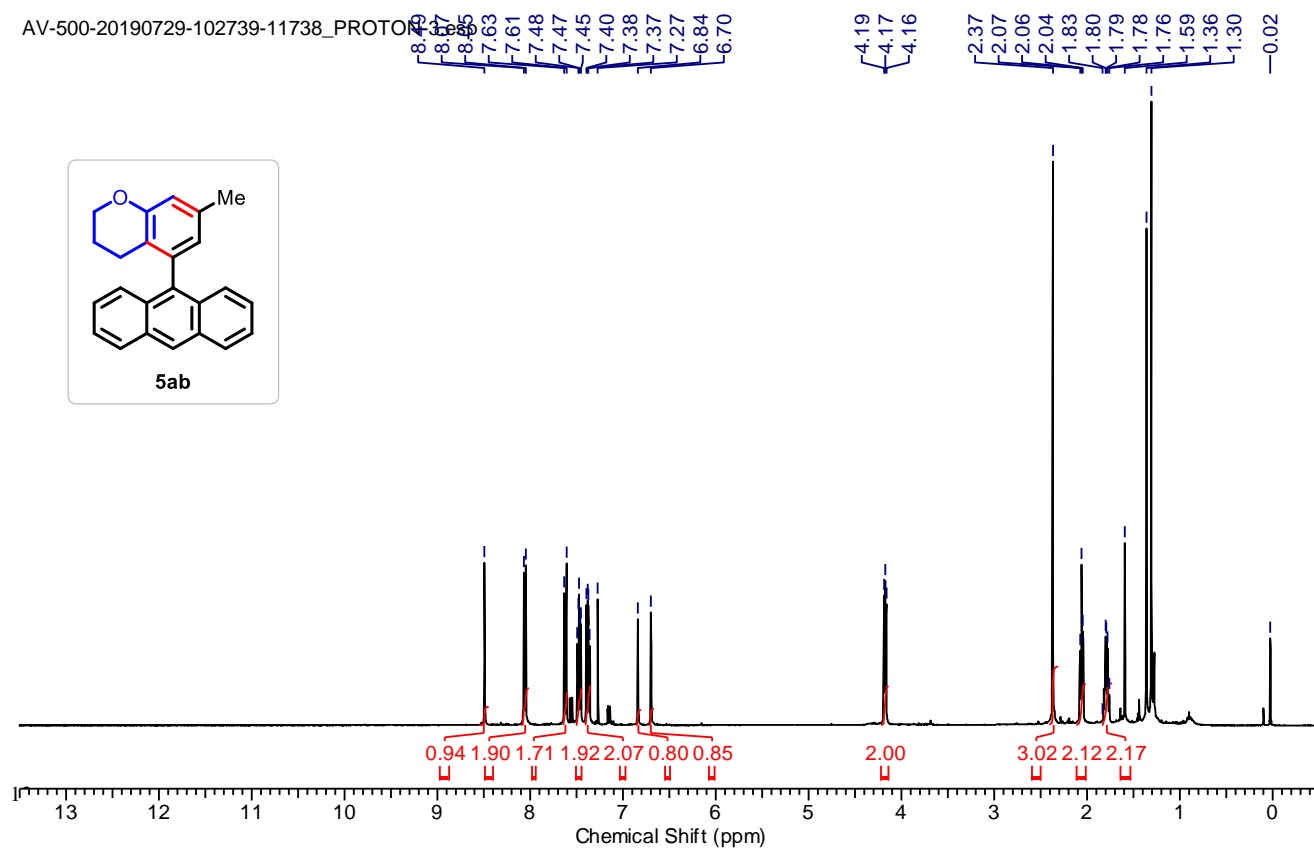<sup>13</sup>C NMR-Spectrum (101 MHz, CDCl<sub>3</sub>) of **5ab**: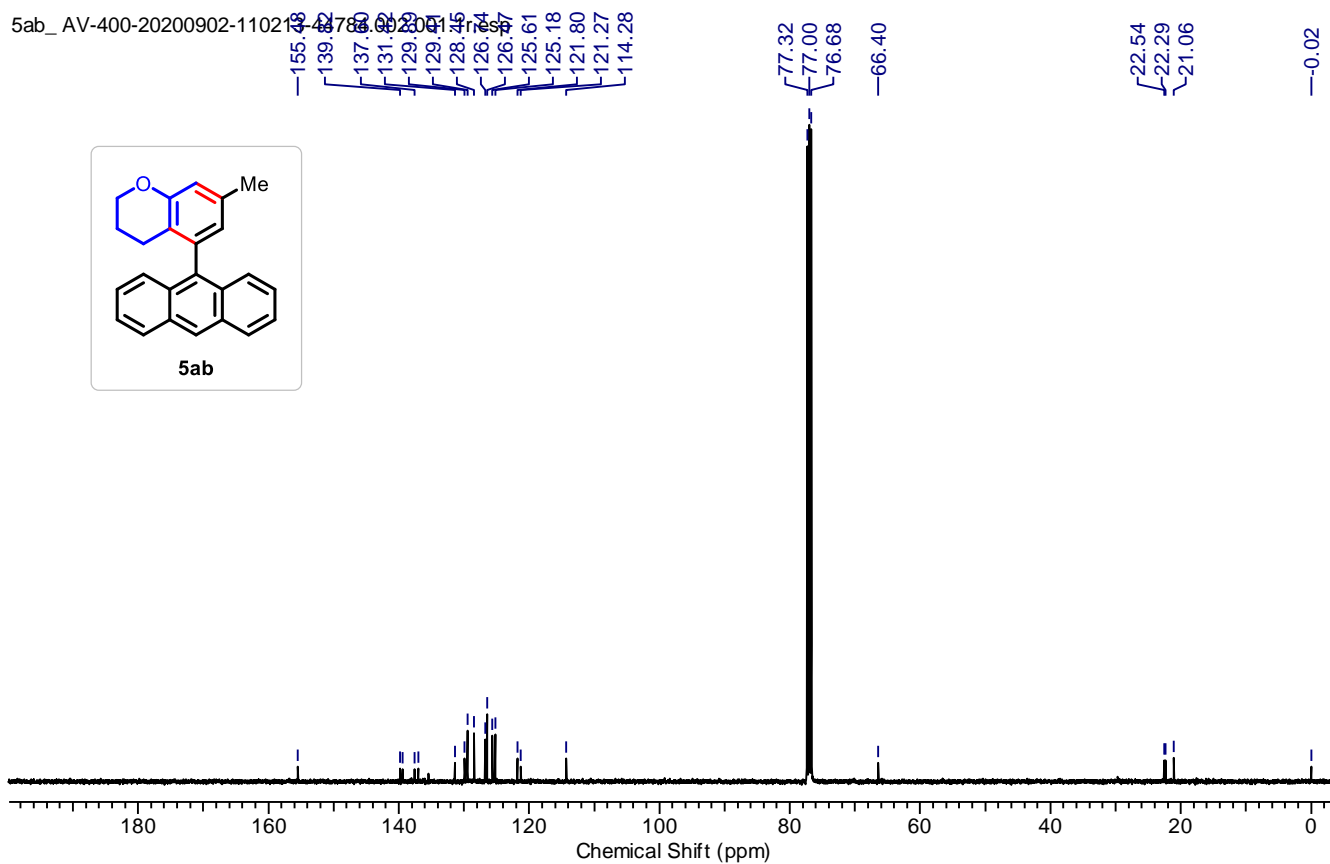

$^1\text{H}$  NMR-Spectrum (200 MHz,  $\text{CDCl}_3$ ) of **5ac**: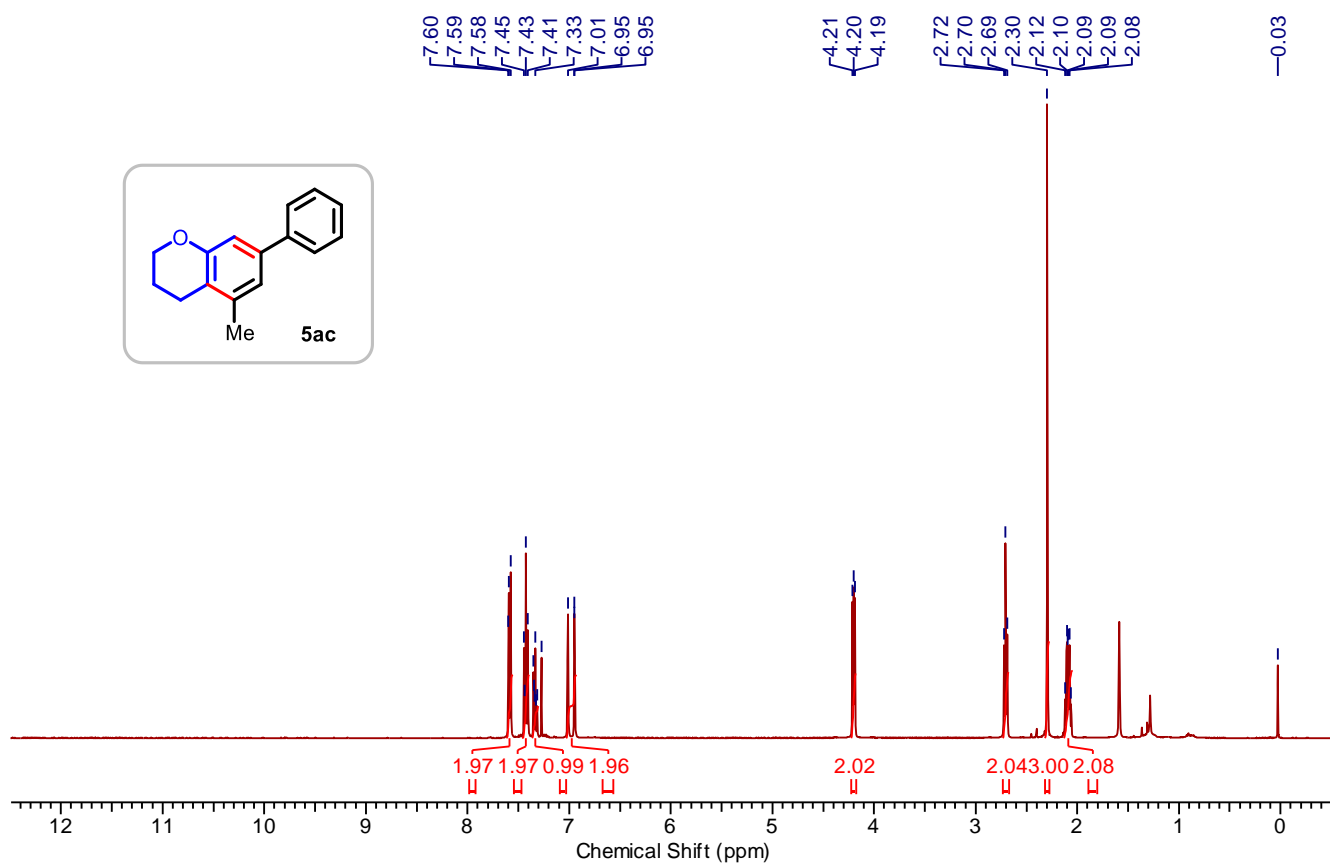 $^{13}\text{C}$  NMR-Spectrum (101 MHz,  $\text{CDCl}_3$ ) of **5ac**: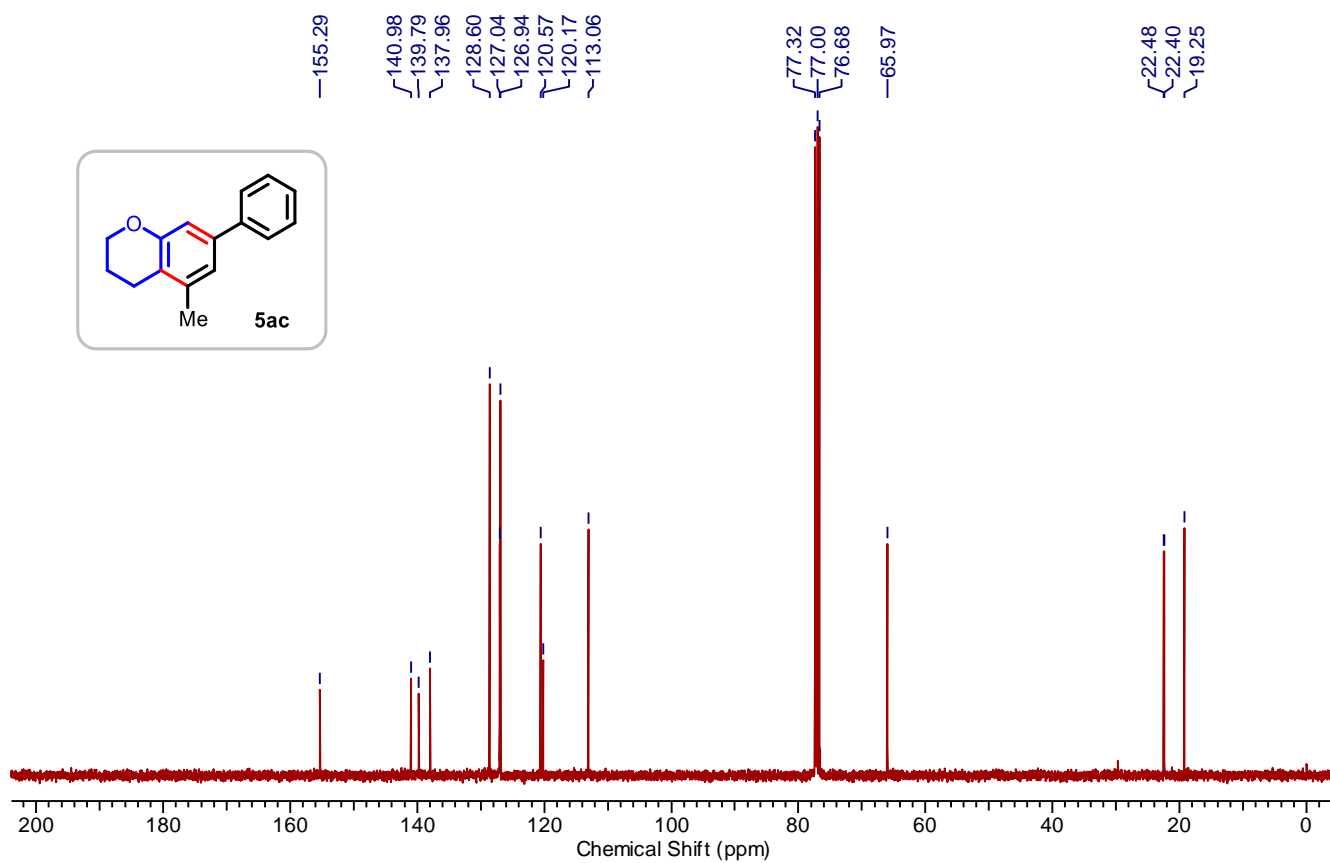

<sup>1</sup>H NMR-Spectrum (400 MHz, CDCl<sub>3</sub>) of **5ad**: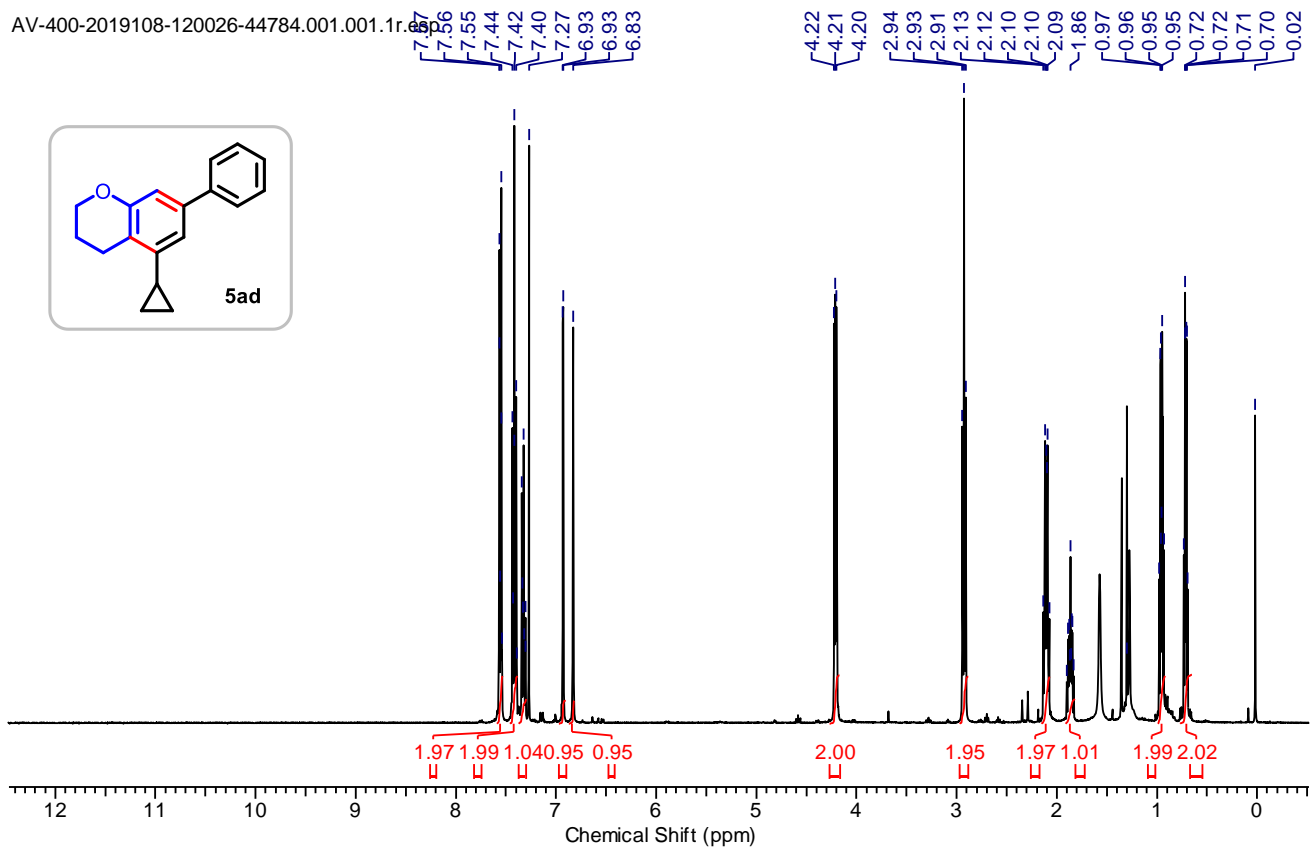<sup>13</sup>C NMR-Spectrum (101 MHz, CDCl<sub>3</sub>) of **5ad**: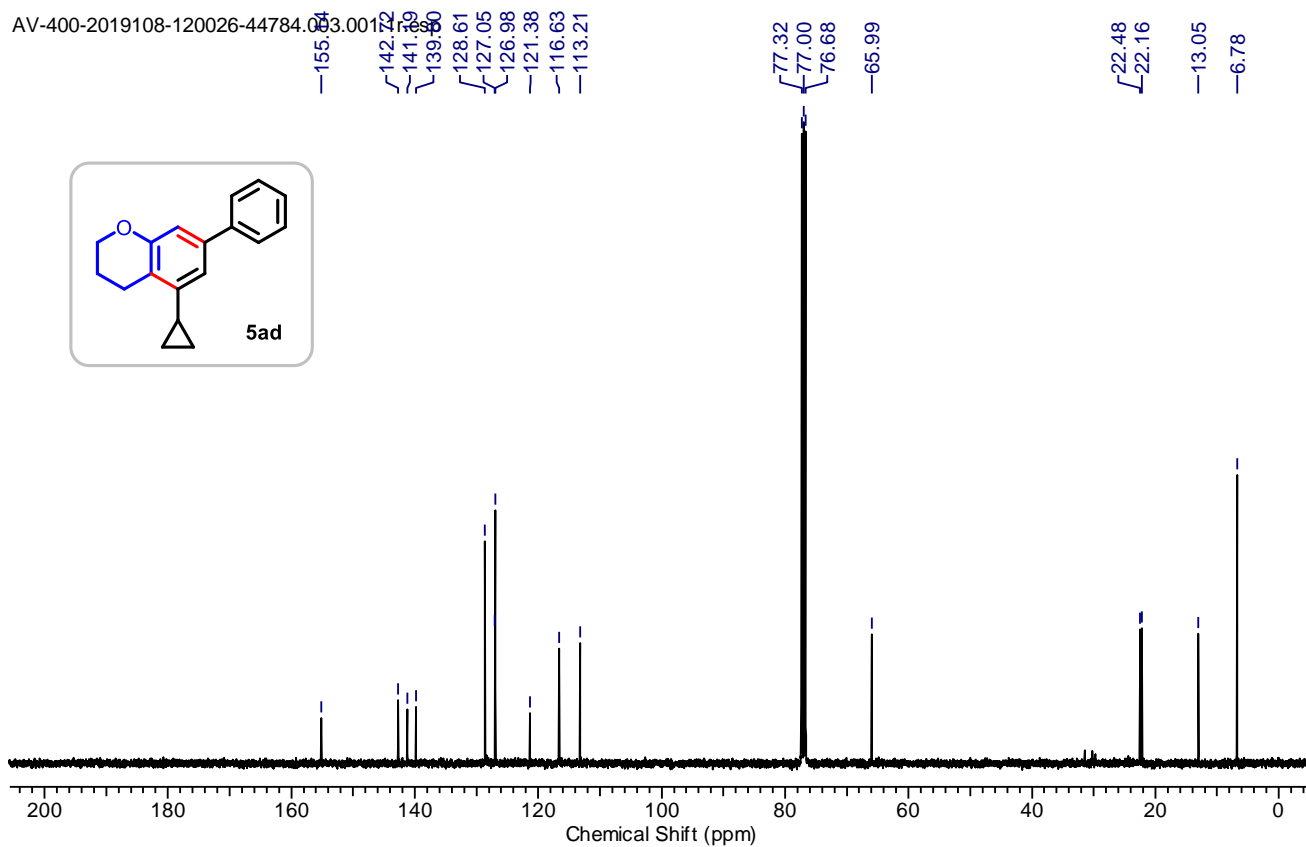

<sup>1</sup>H NMR-Spectrum (400 MHz, CDCl<sub>3</sub>) of **5ae**: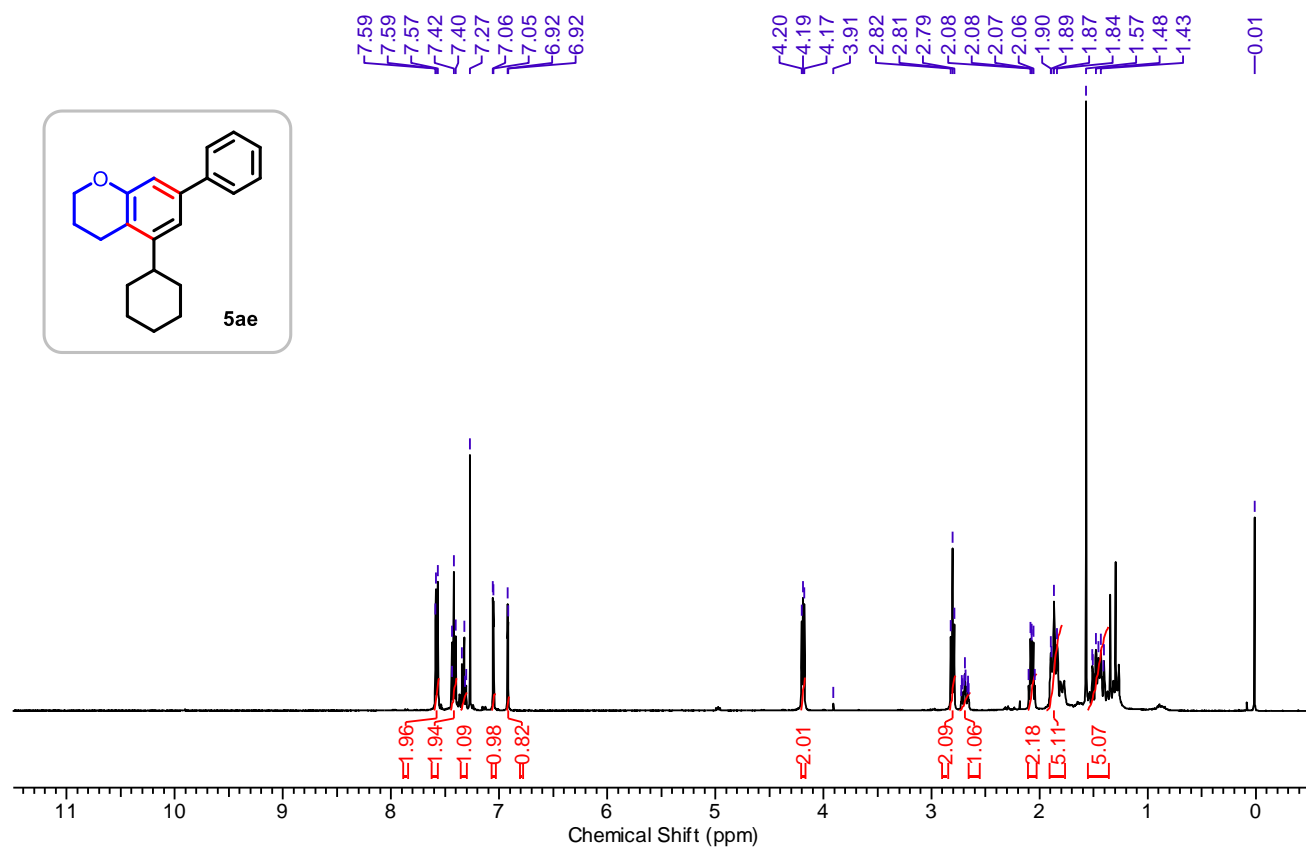<sup>13</sup>C NMR-Spectrum (101 MHz, CDCl<sub>3</sub>) of **5ae**: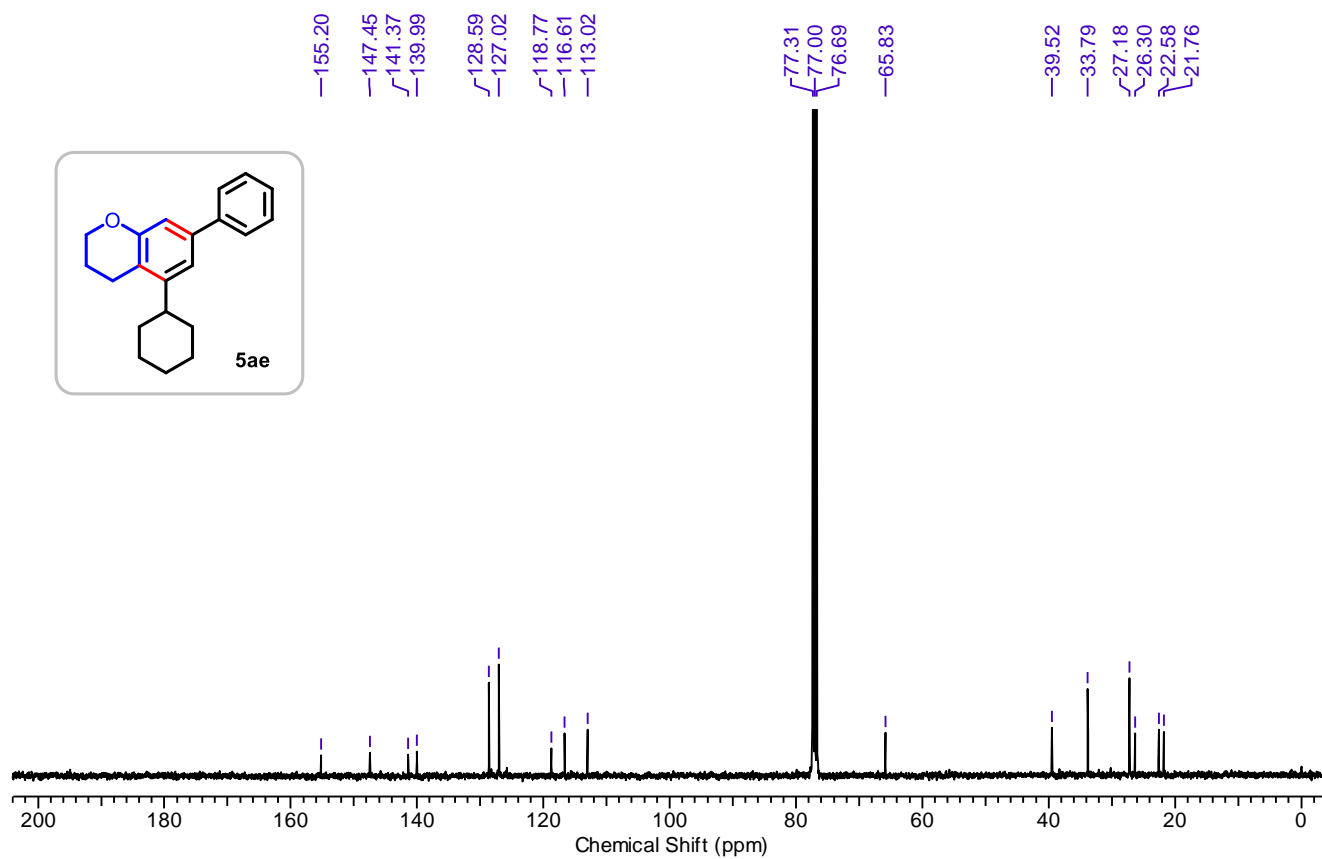

$^1\text{H}$  NMR-Spectrum (500 MHz,  $\text{CDCl}_3$ ) of **5af**:

AN-08-61-01 1H and 13C AV-500-2019021531480711681004081.1r.esp

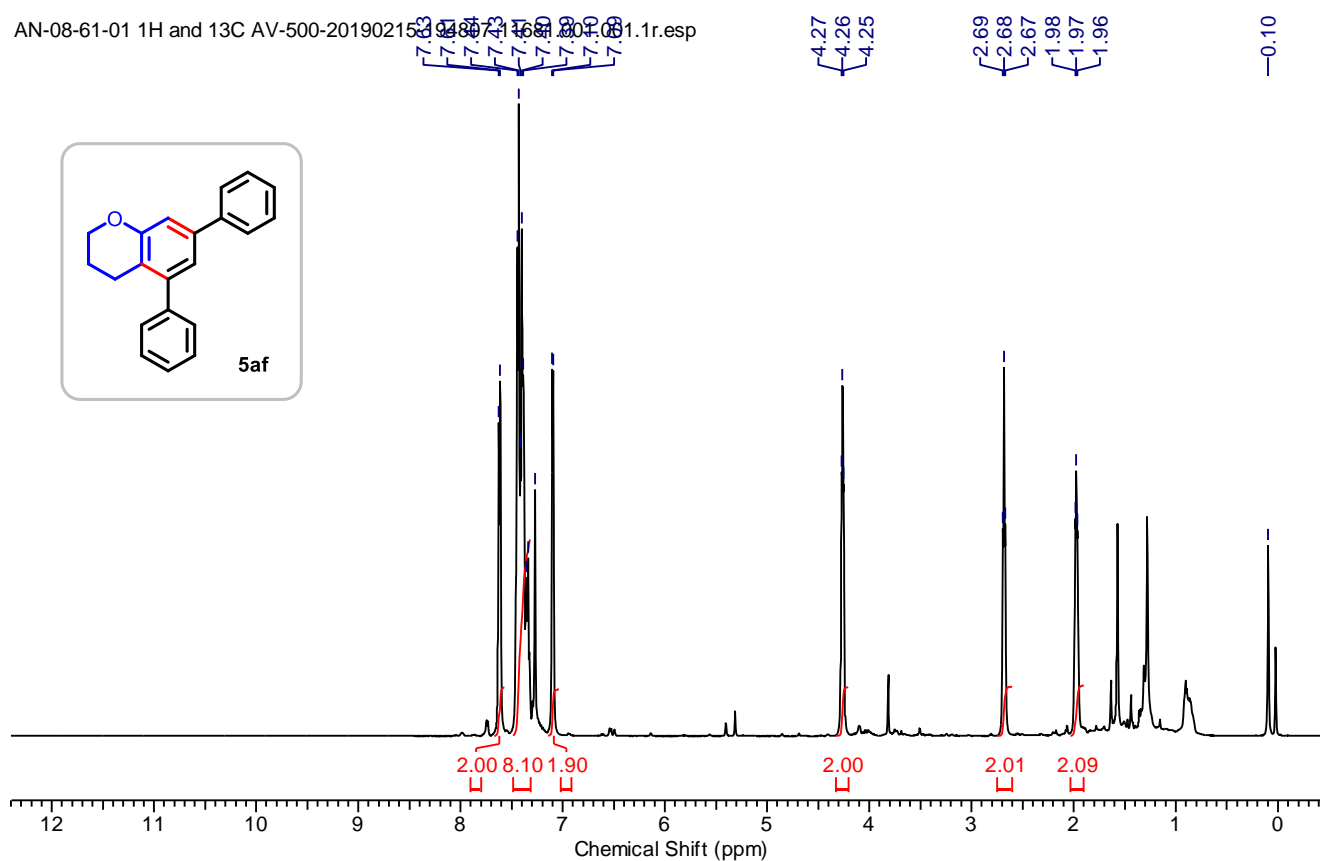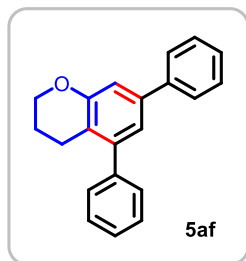 $^{13}\text{C}$  NMR-Spectrum (126 MHz,  $\text{CDCl}_3$ ) of **5af**:

AN-08-61-01 1H and 13C AV-500-2019021531480711681004081.1r.esp

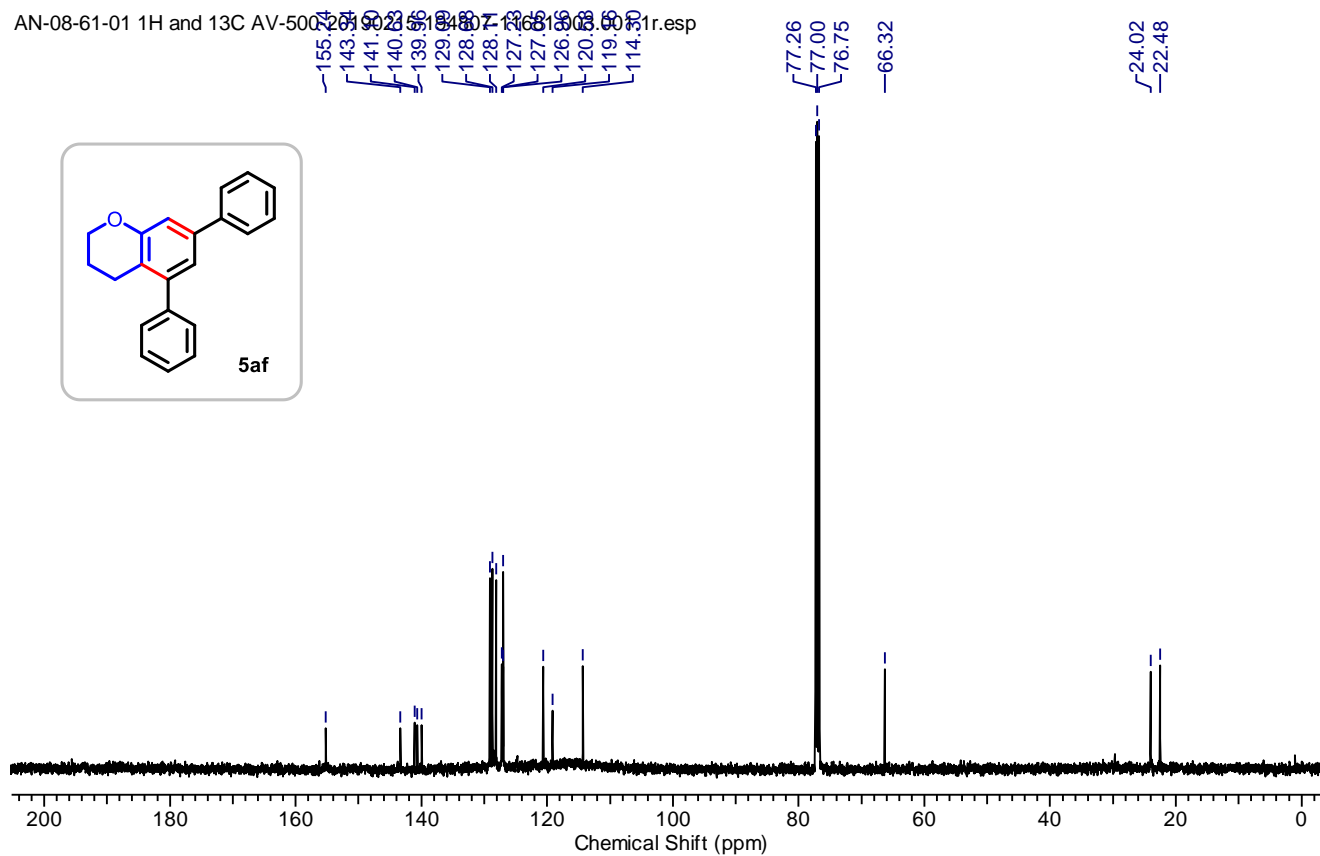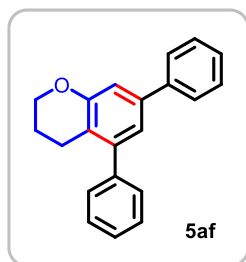



<sup>1</sup>H NMR-Spectrum (400 MHz, CDCl<sub>3</sub>) of **5ag**: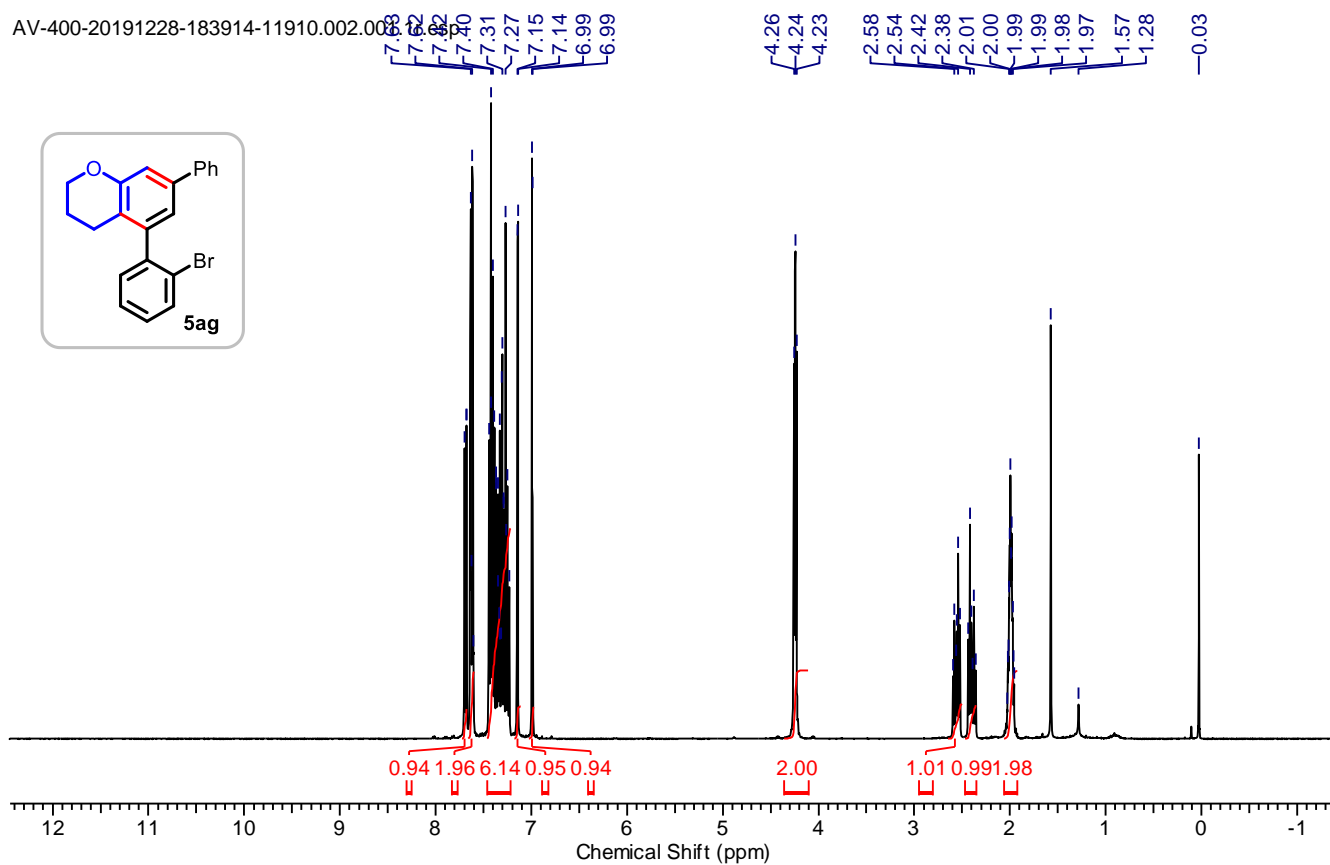<sup>13</sup>C NMR-Spectrum (101 MHz, CDCl<sub>3</sub>) of **5ag**: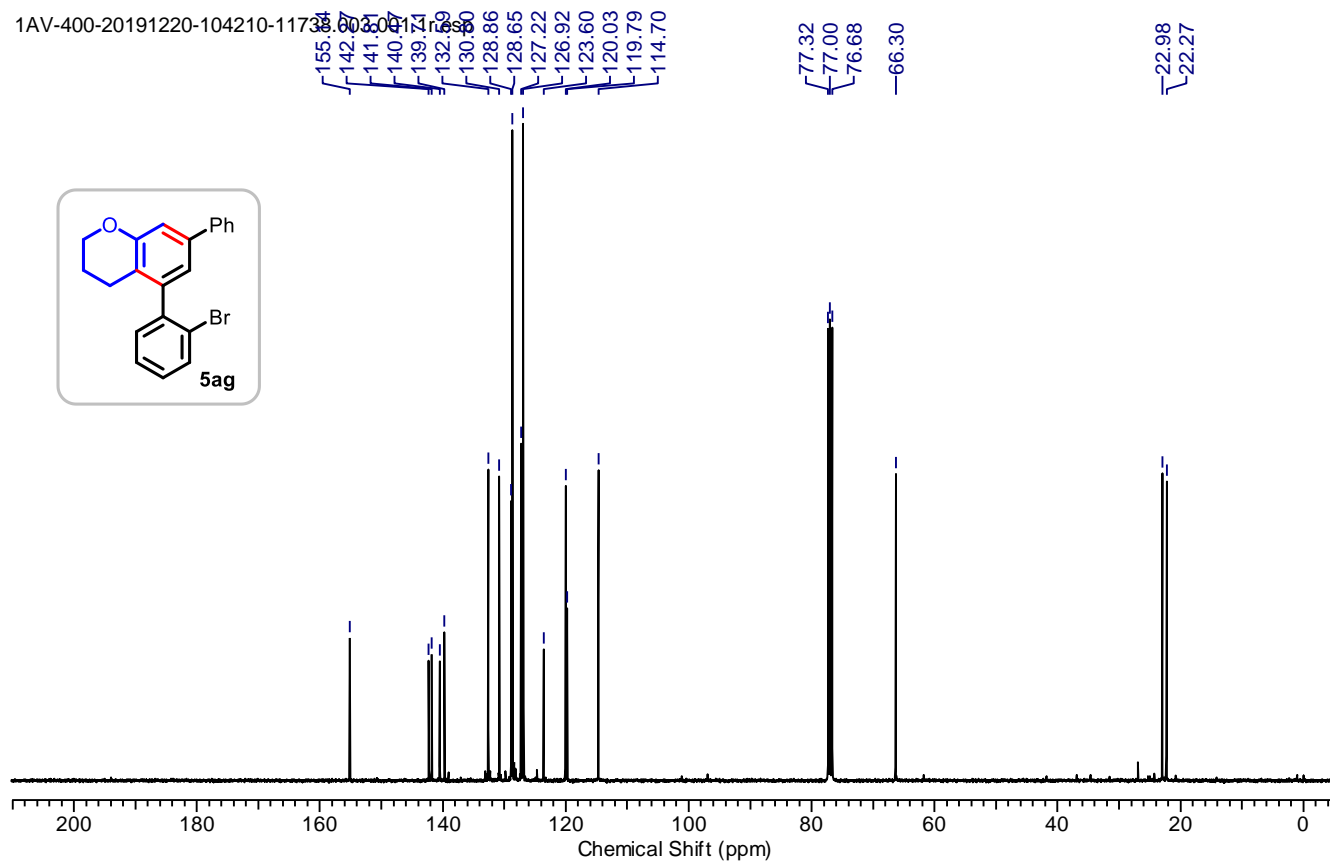

<sup>1</sup>H NMR-Spectrum (400 MHz, CDCl<sub>3</sub>) of **5ah**: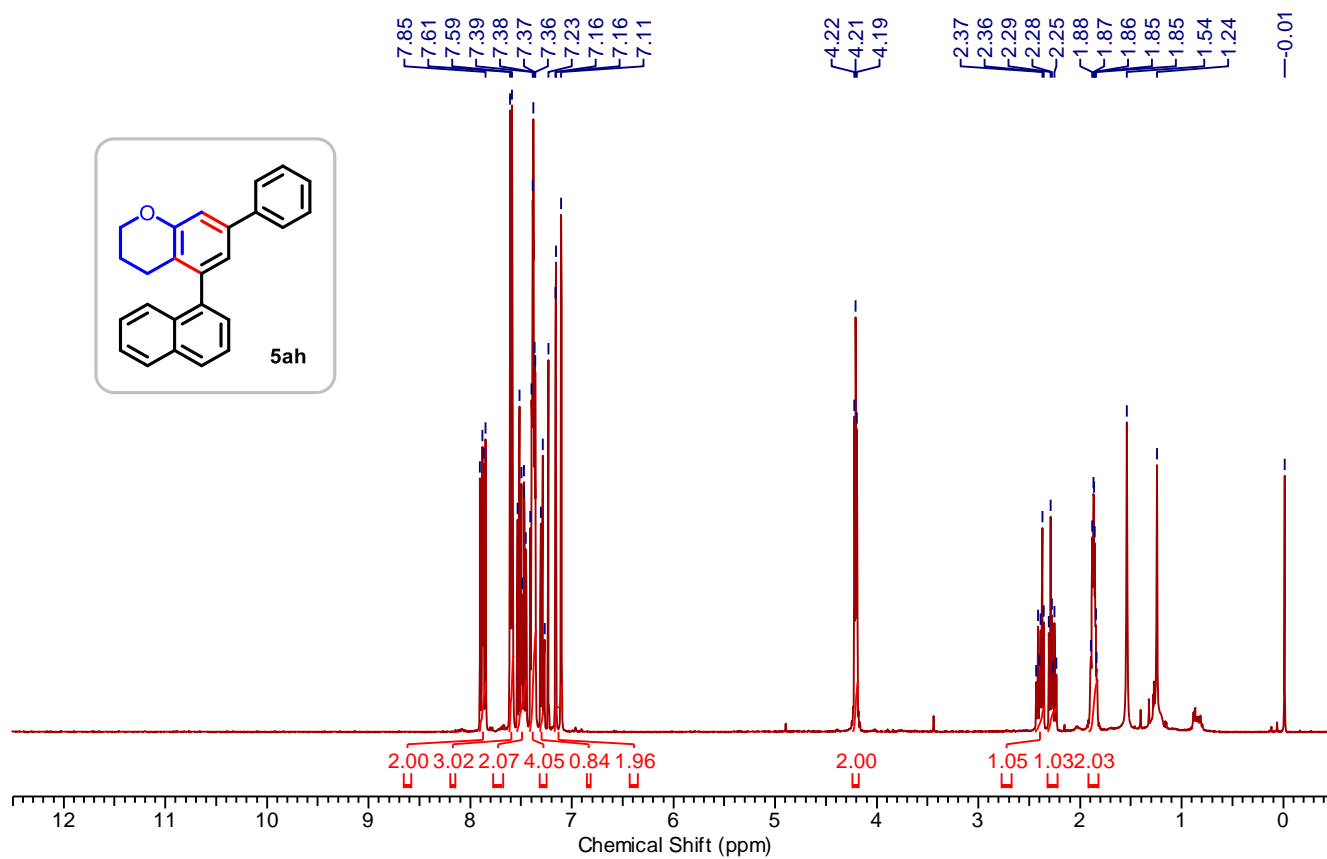<sup>13</sup>C NMR-Spectrum (101 MHz, CDCl<sub>3</sub>) of **5ah**: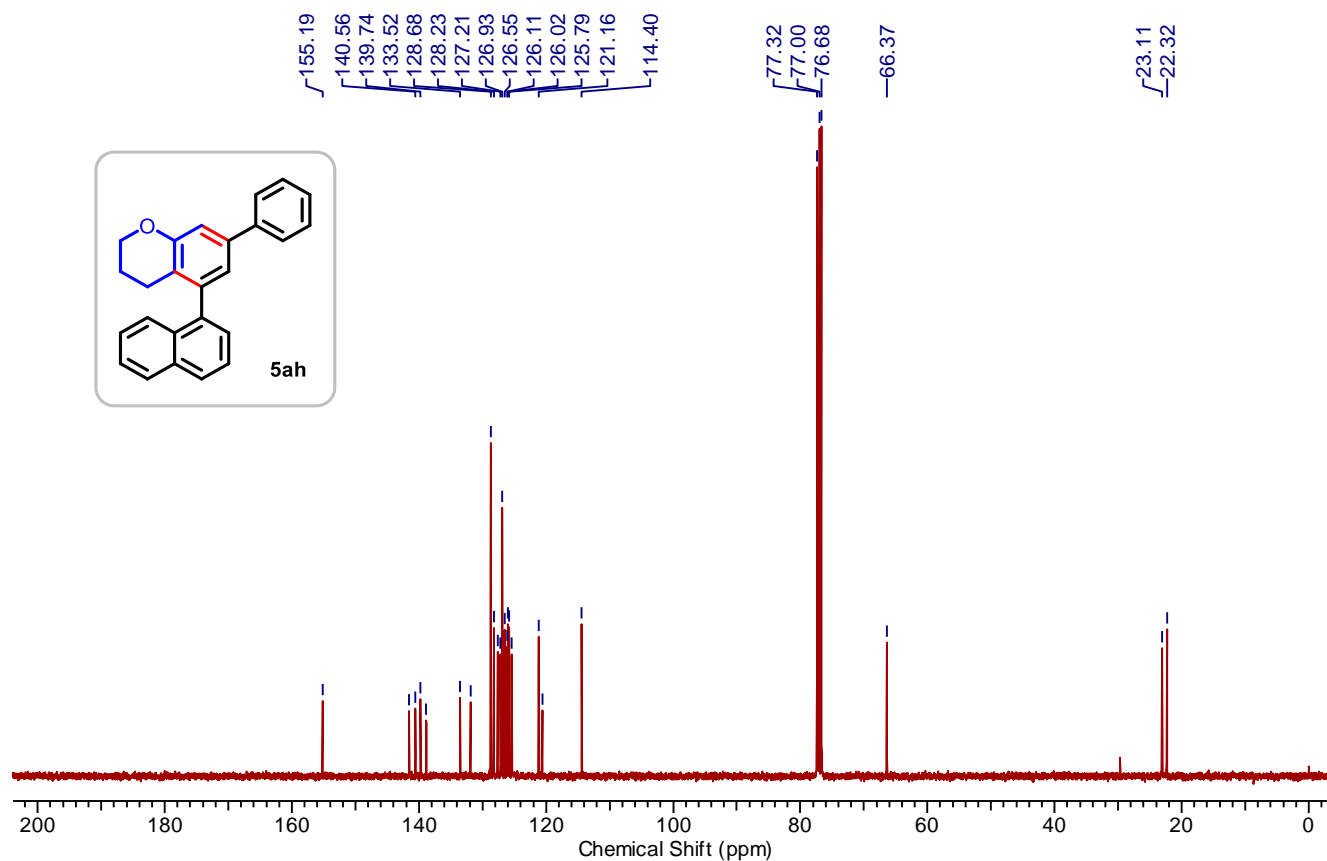

<sup>1</sup>H NMR-Spectrum (400 MHz, CDCl<sub>3</sub>) of **5ai**: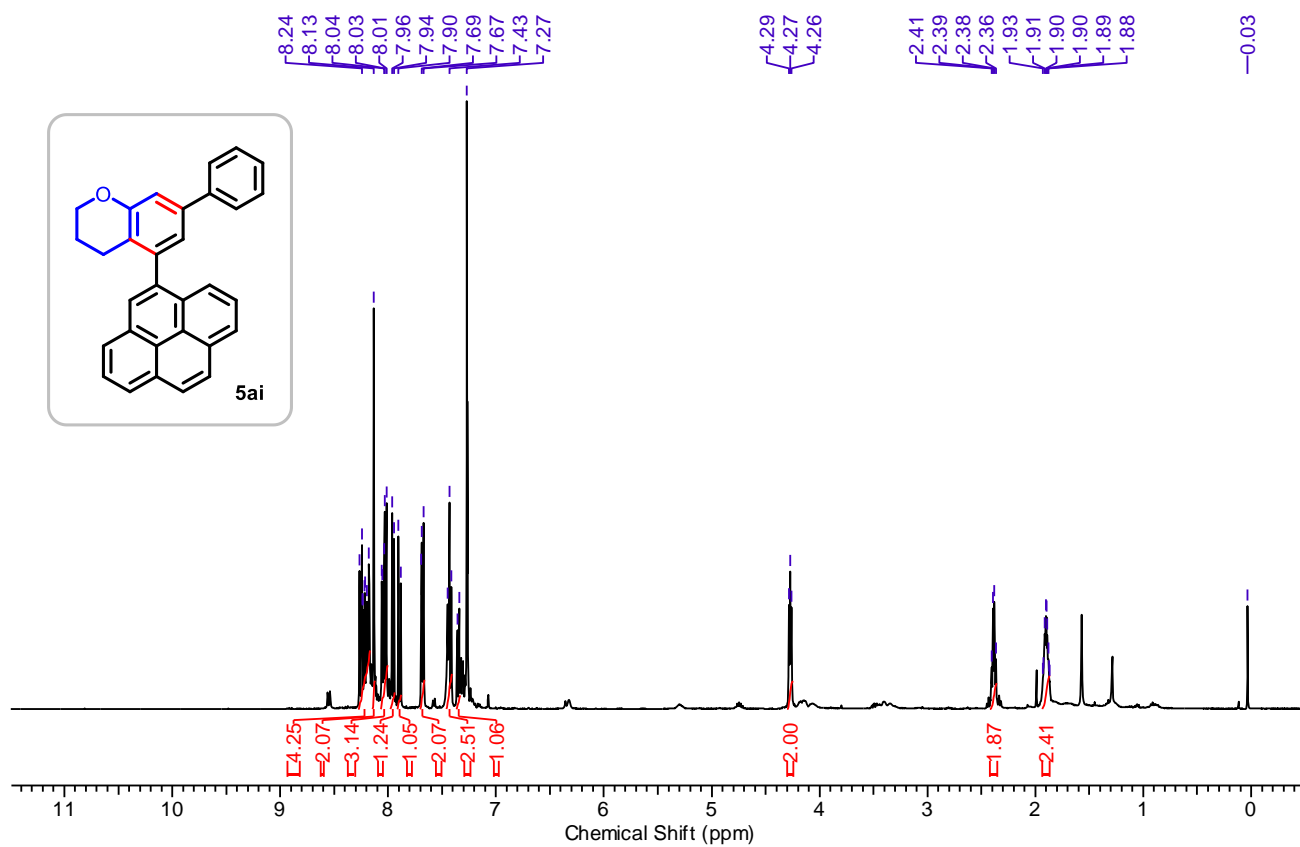<sup>13</sup>C NMR-Spectrum (101 MHz, CDCl<sub>3</sub>) of **5ai**: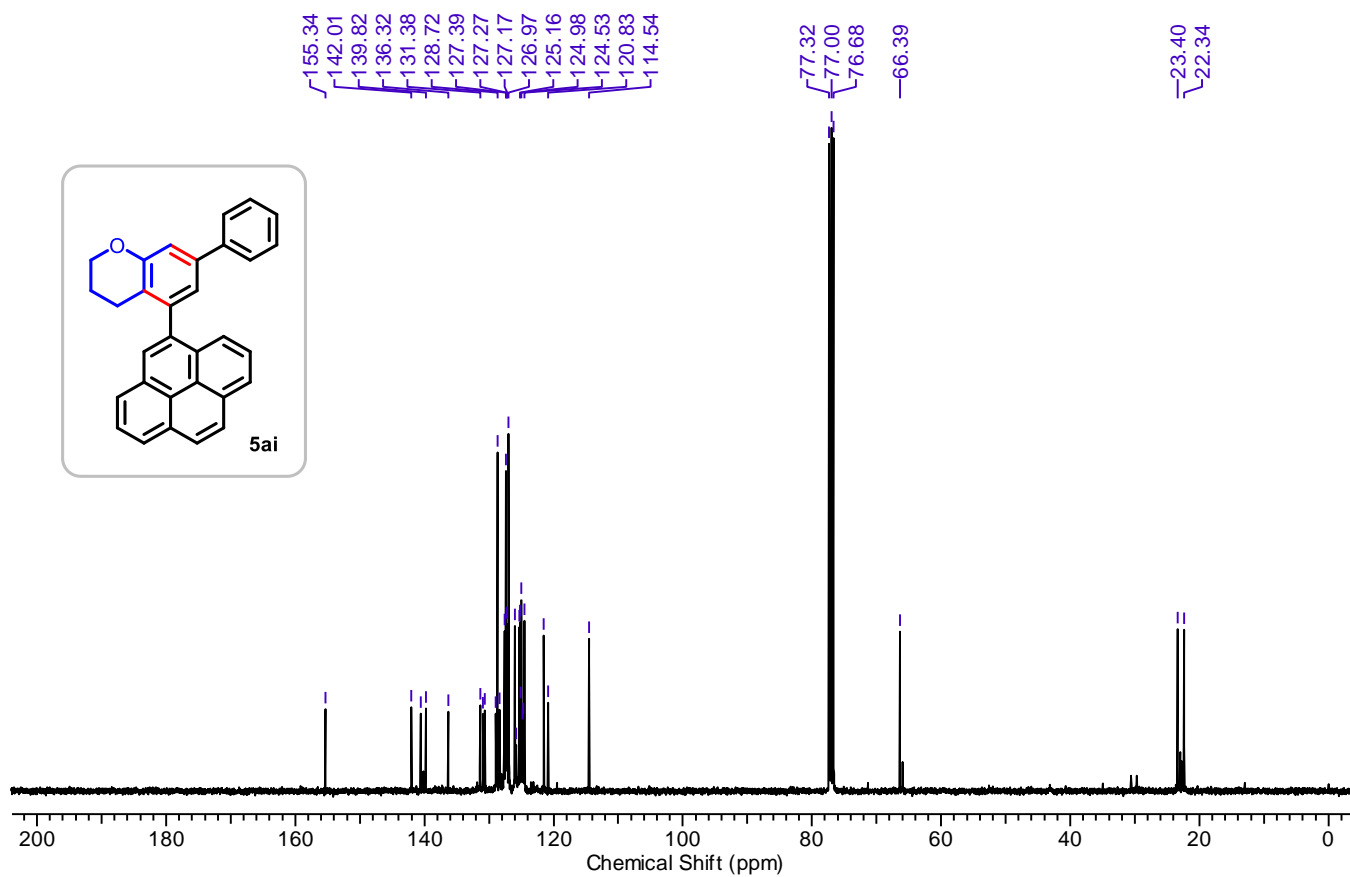

<sup>1</sup>H NMR-Spectrum (400 MHz, CDCl<sub>3</sub>) of **5aj**: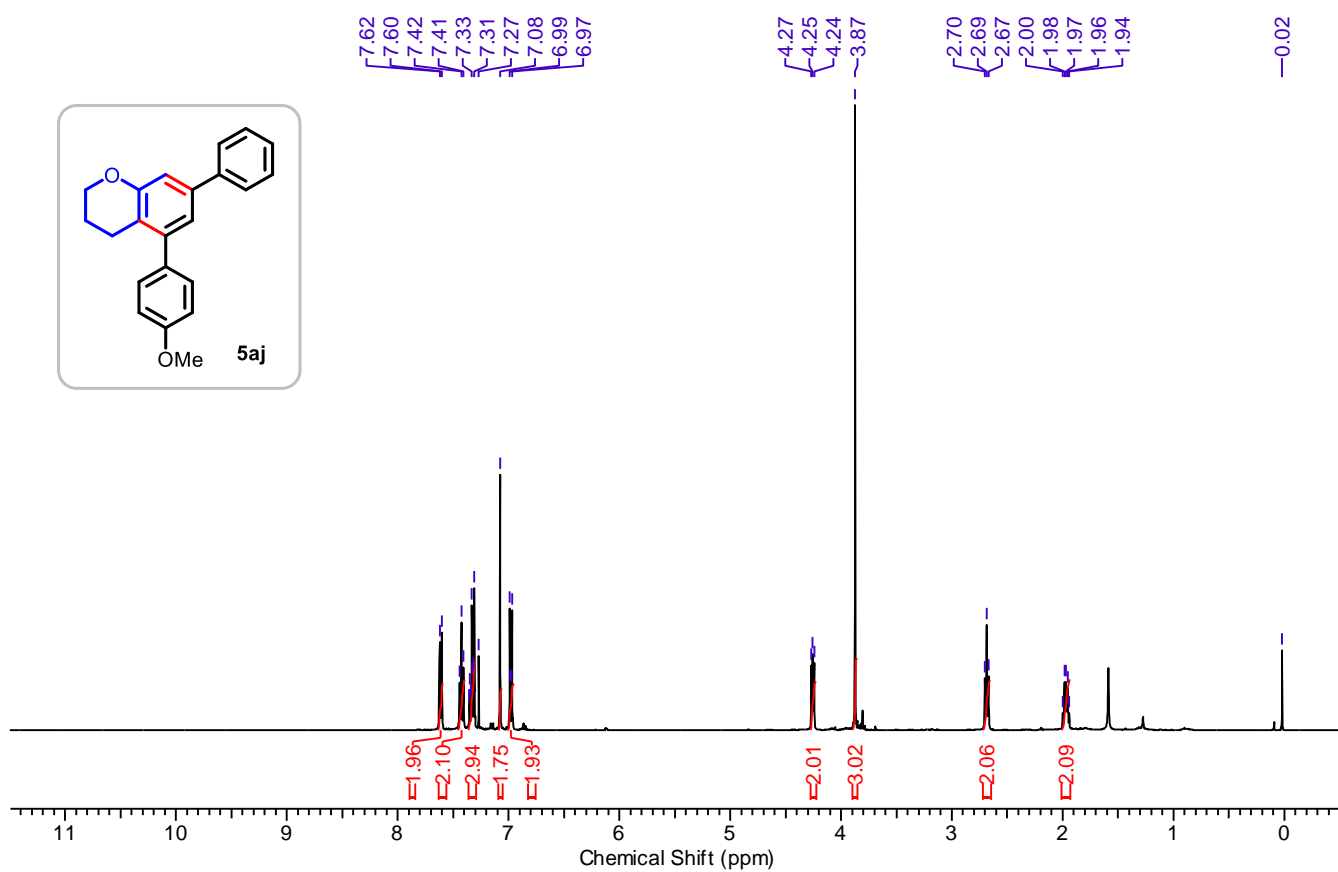<sup>13</sup>C NMR-Spectrum (101 MHz, CDCl<sub>3</sub>) of **5aj**: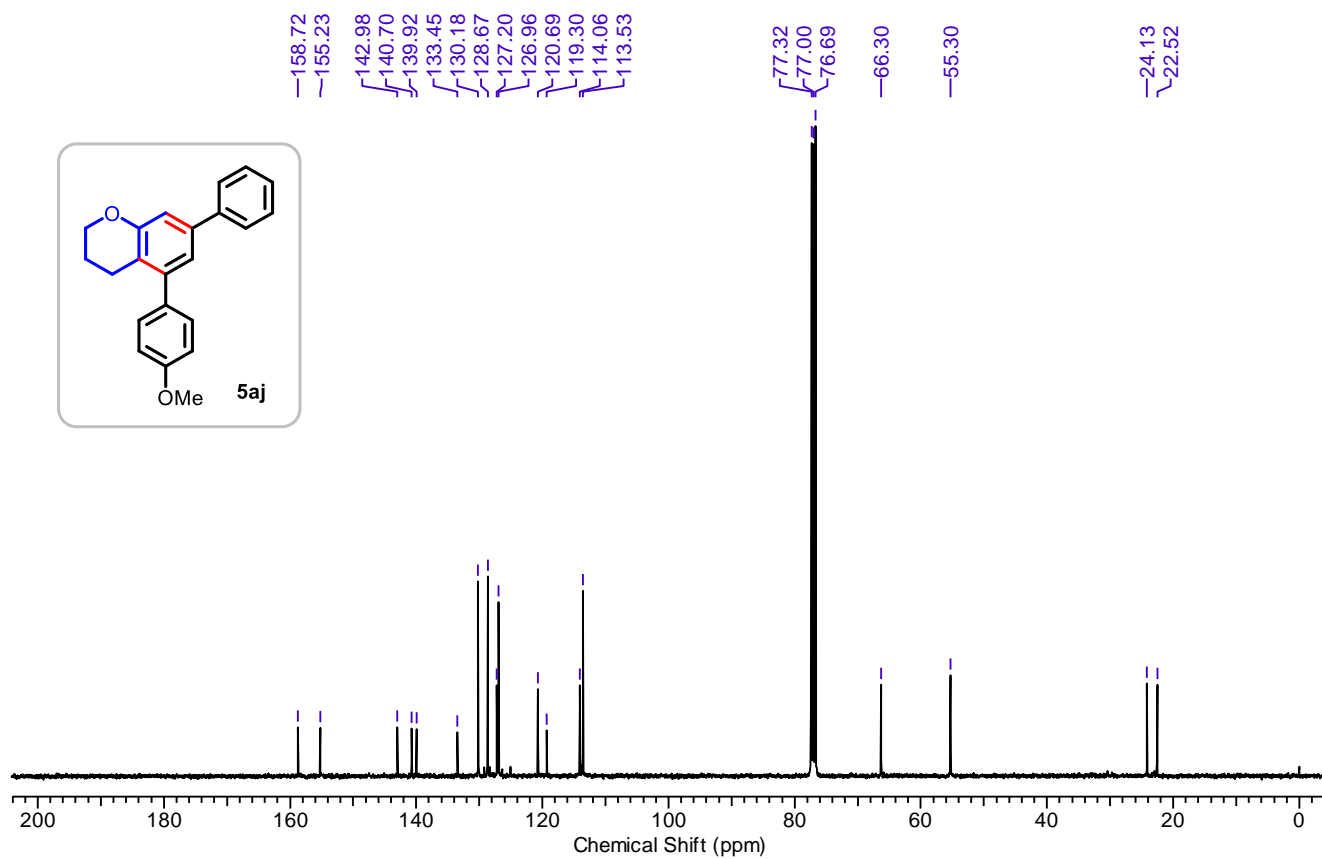

<sup>1</sup>H NMR-Spectrum (500 MHz, CDCl<sub>3</sub>) of **5ak**: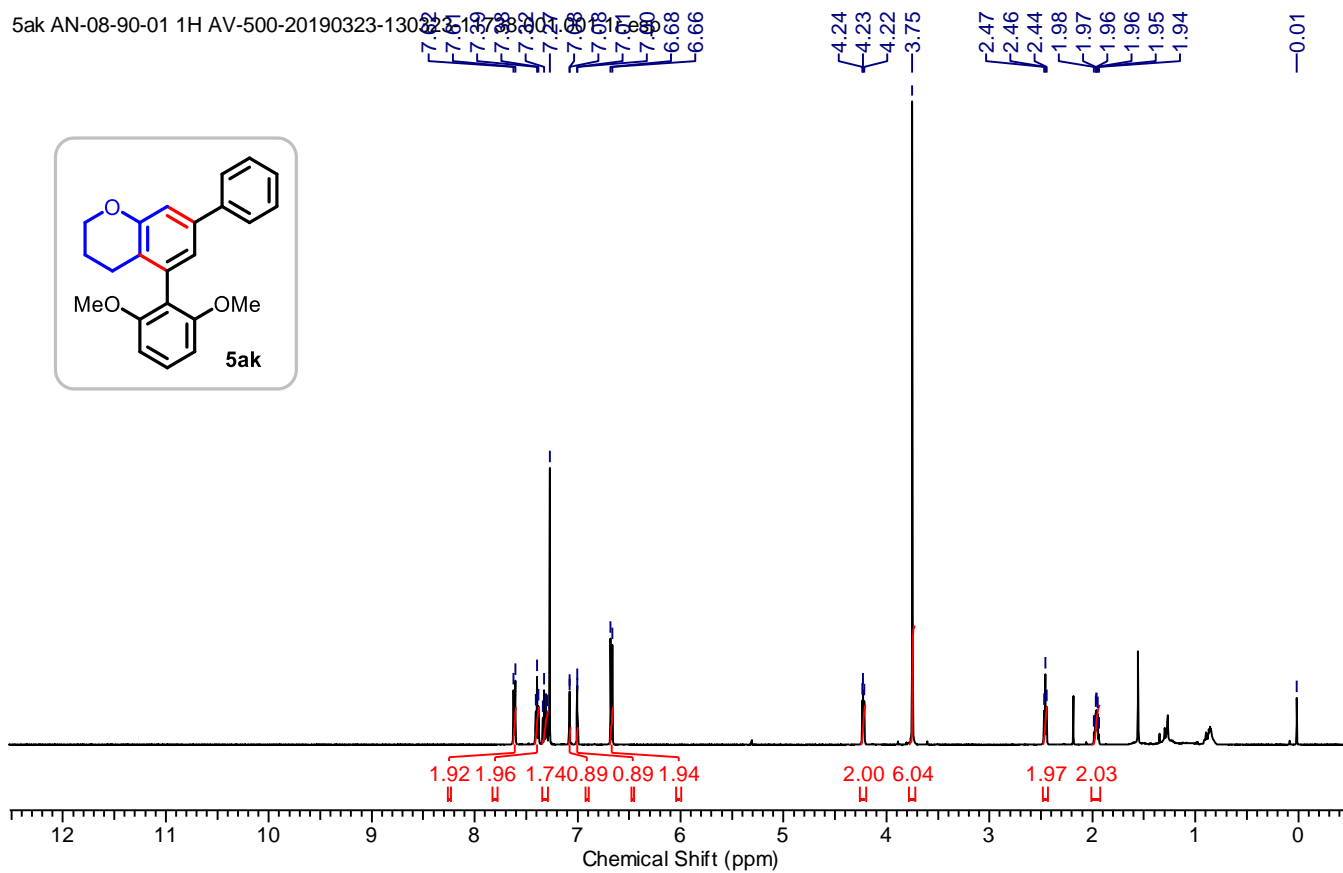<sup>13</sup>C NMR-Spectrum (126 MHz, CDCl<sub>3</sub>) of **5ak**: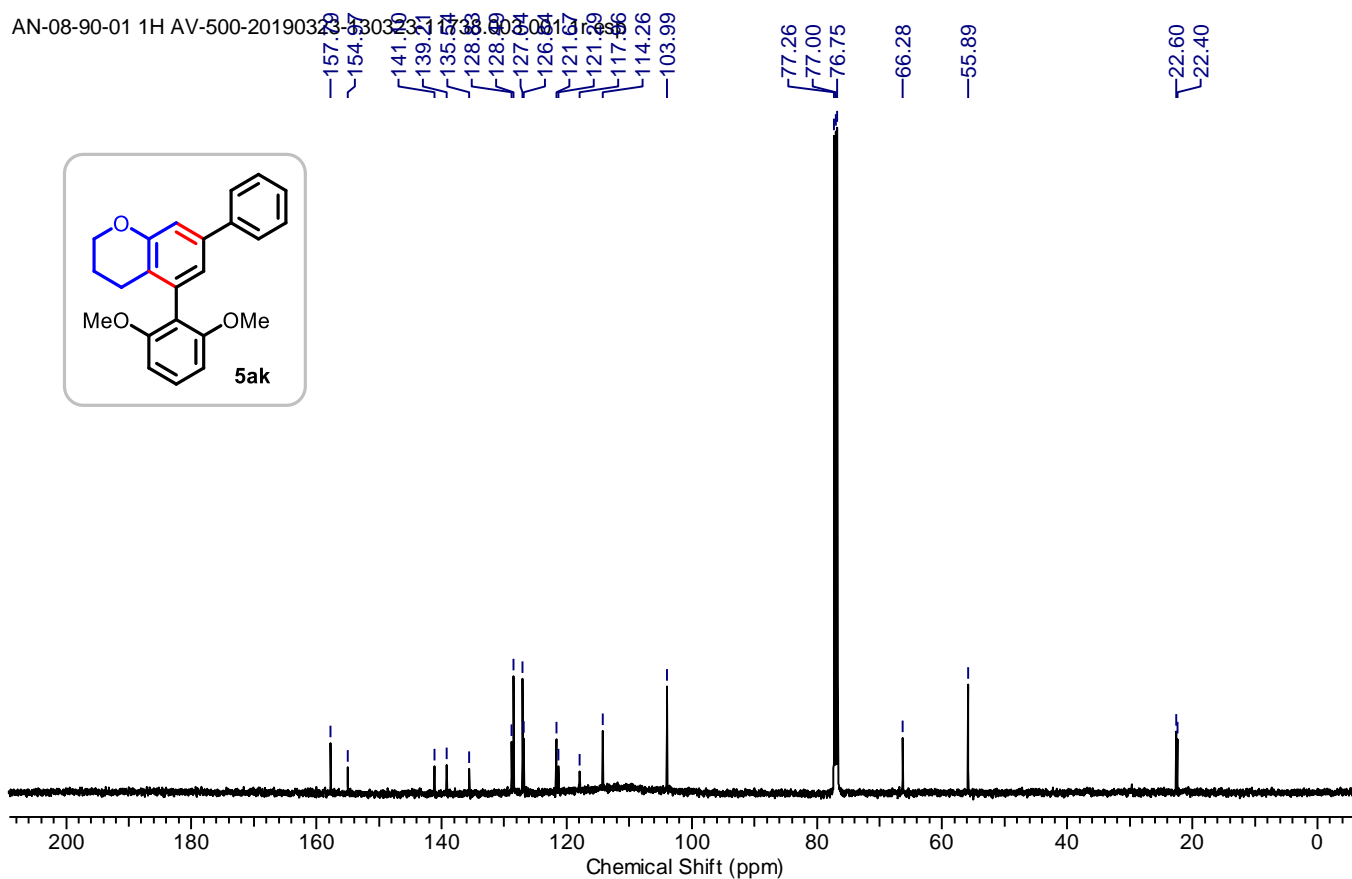

$^1\text{H}$  NMR-Spectrum (400 MHz,  $\text{CDCl}_3$ ) of **5al**: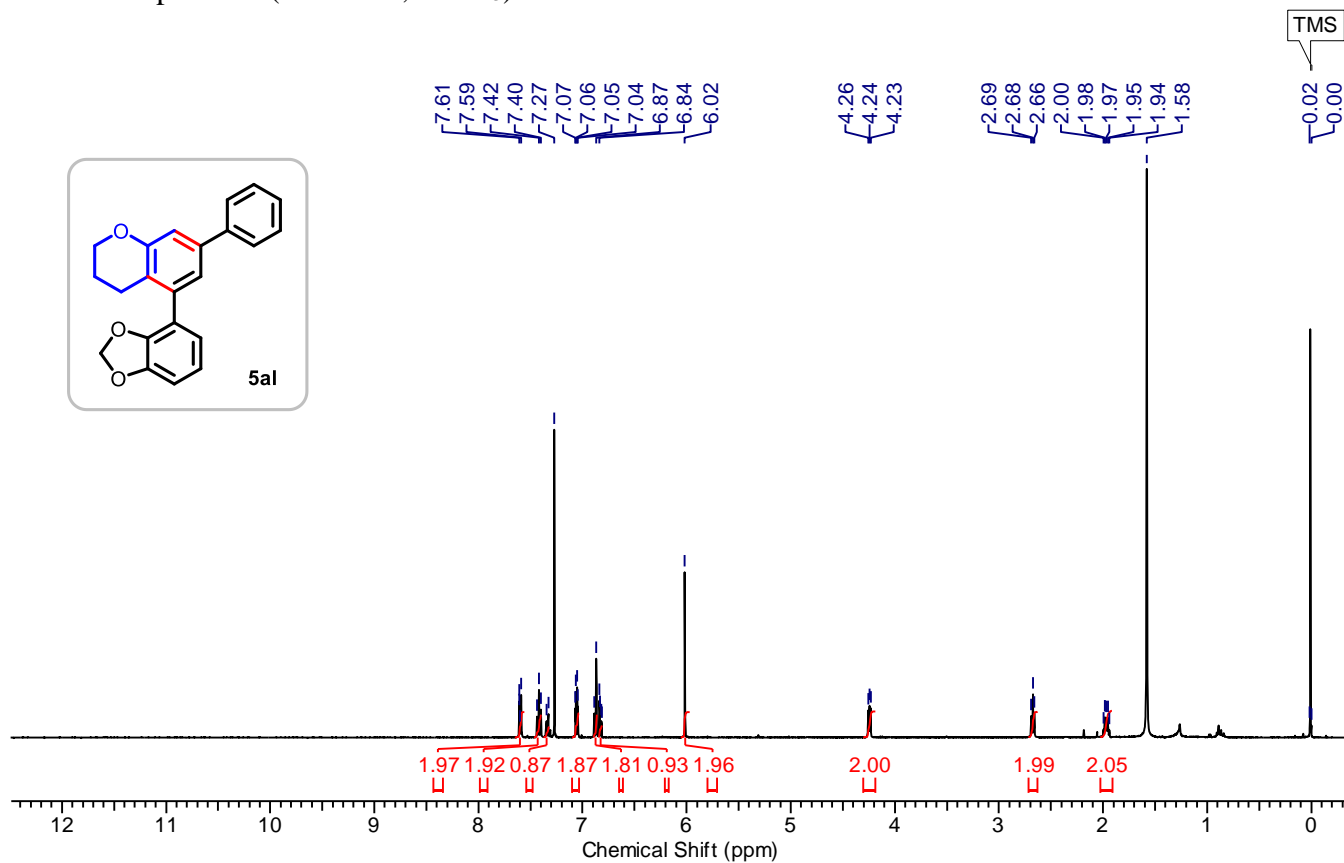 $^{13}\text{C}$  NMR-Spectrum (101 MHz,  $\text{CDCl}_3$ ) of **5al**: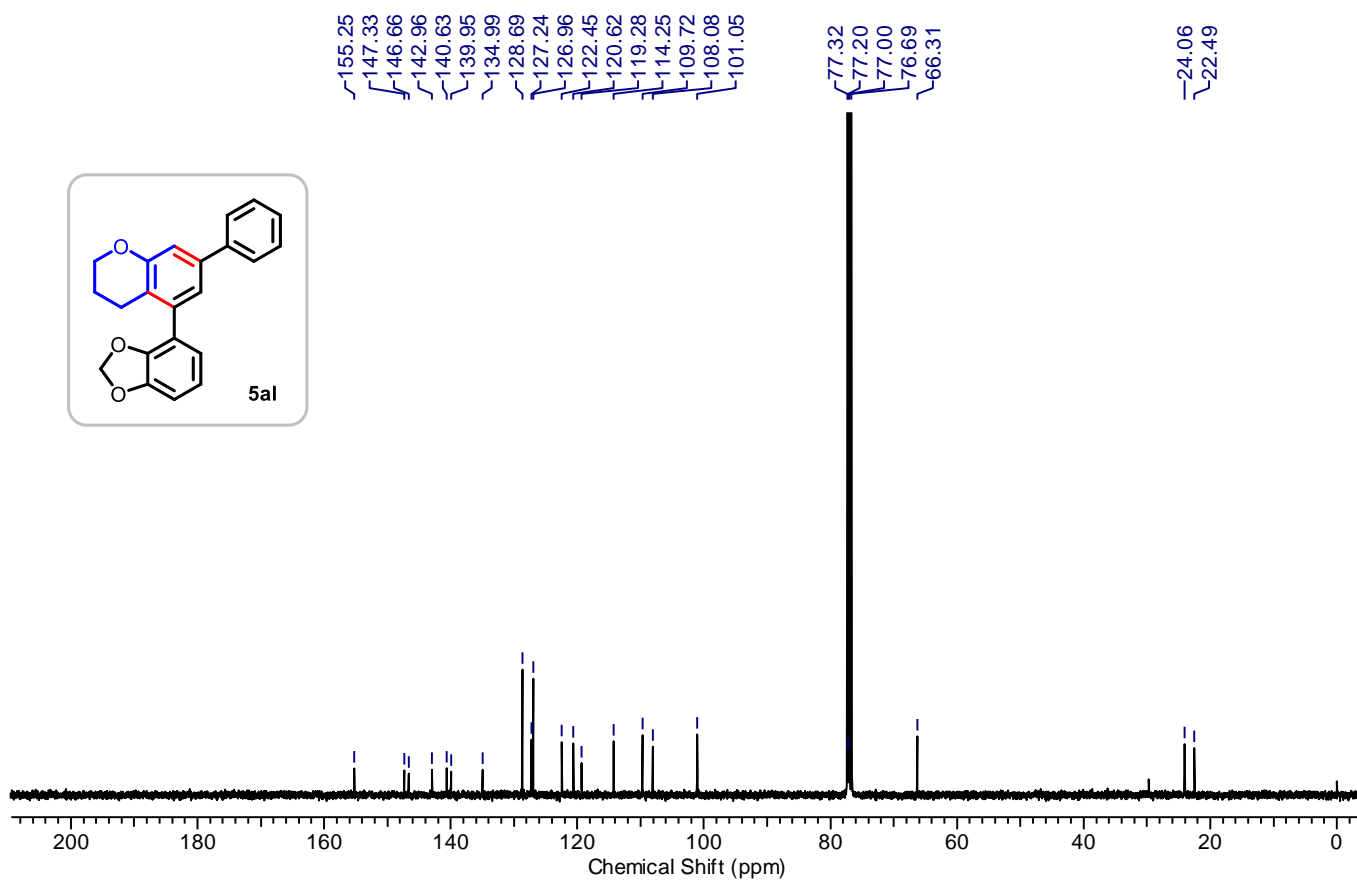

$^1\text{H}$  NMR-Spectrum (400 MHz,  $\text{CDCl}_3$ ) of **5am**: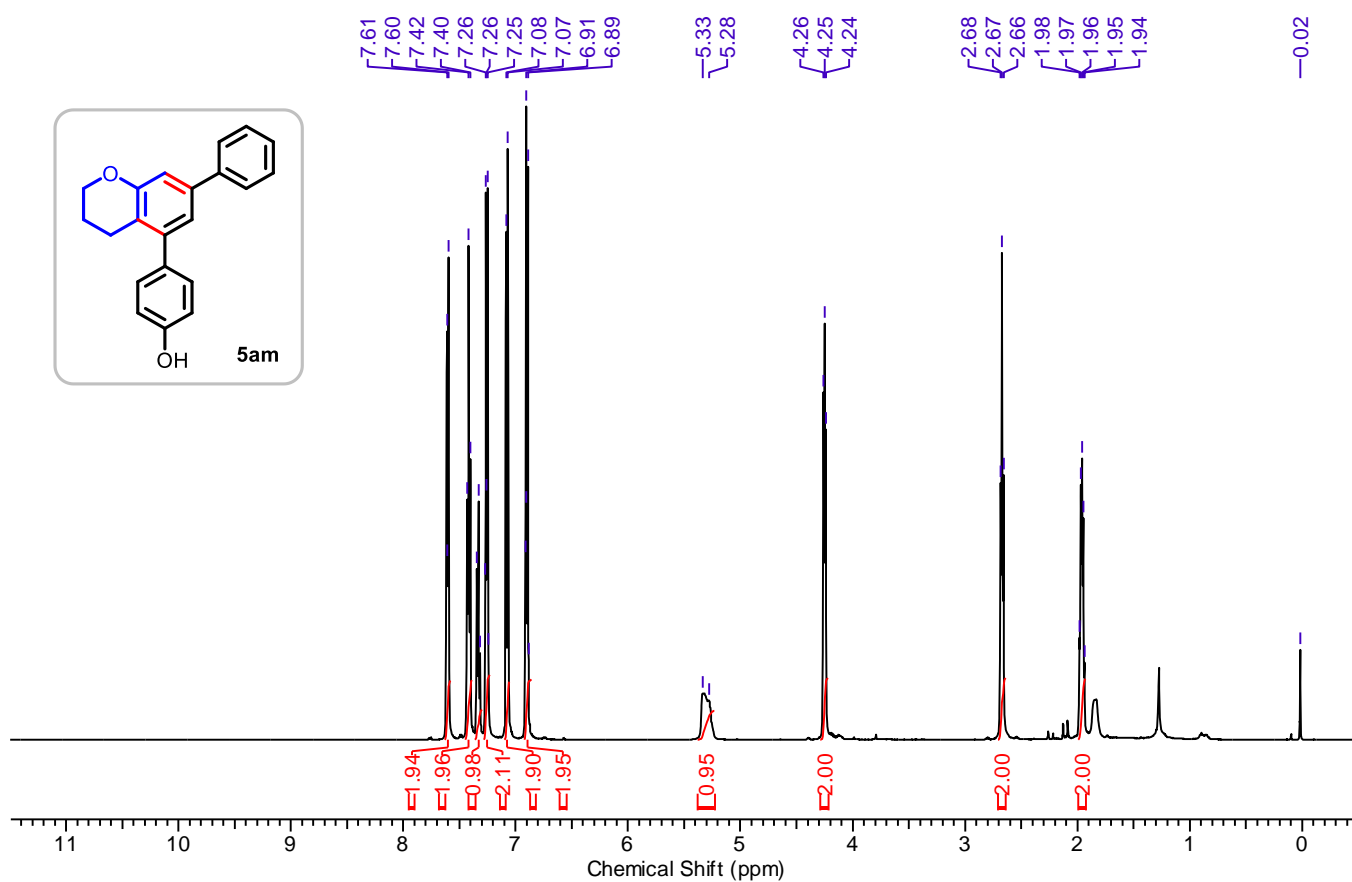 $^{13}\text{C}$  NMR-Spectrum (101 MHz,  $\text{CDCl}_3$ ) of **5am**: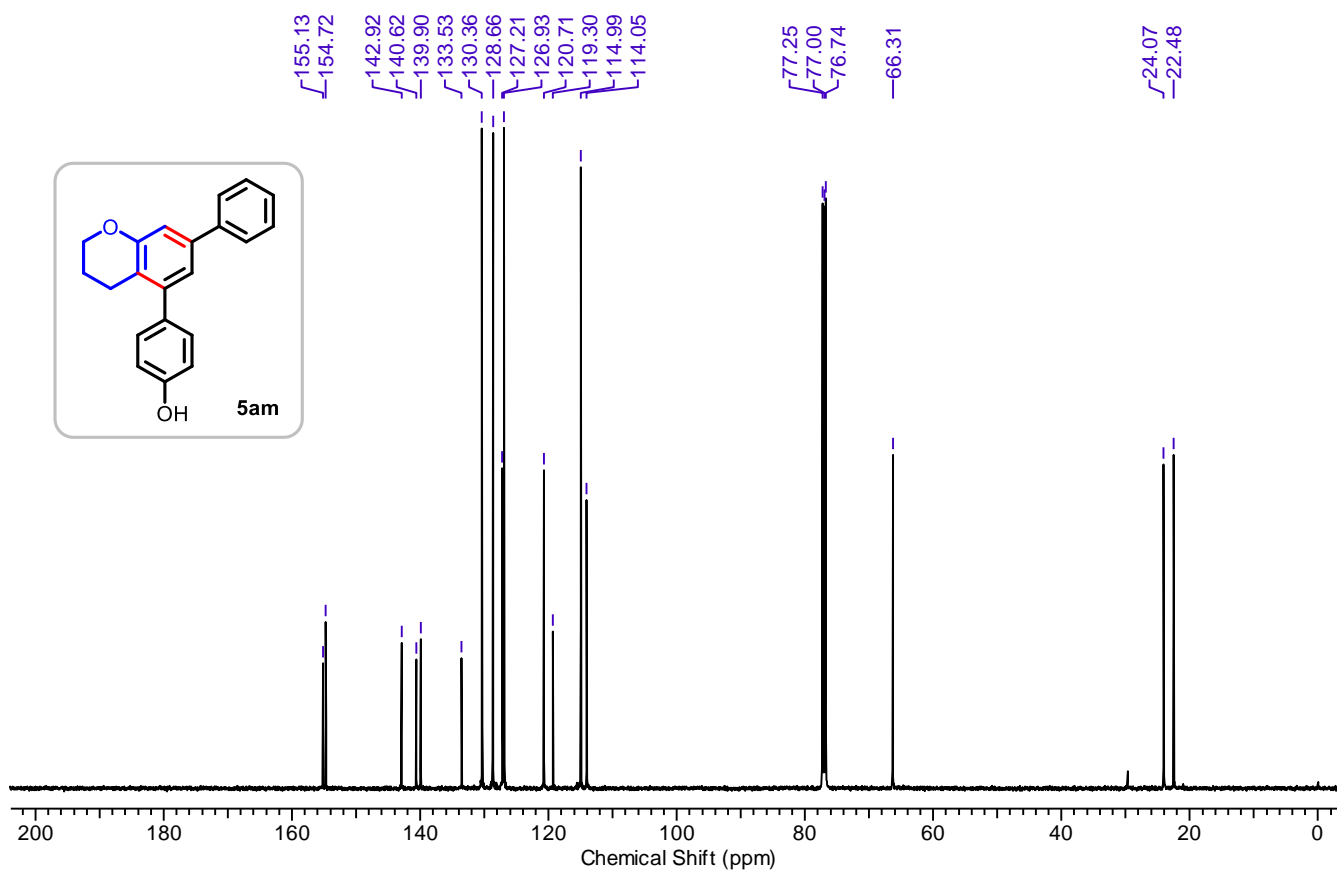

<sup>1</sup>H NMR-Spectrum (400 MHz, CDCl<sub>3</sub>) of **5an**: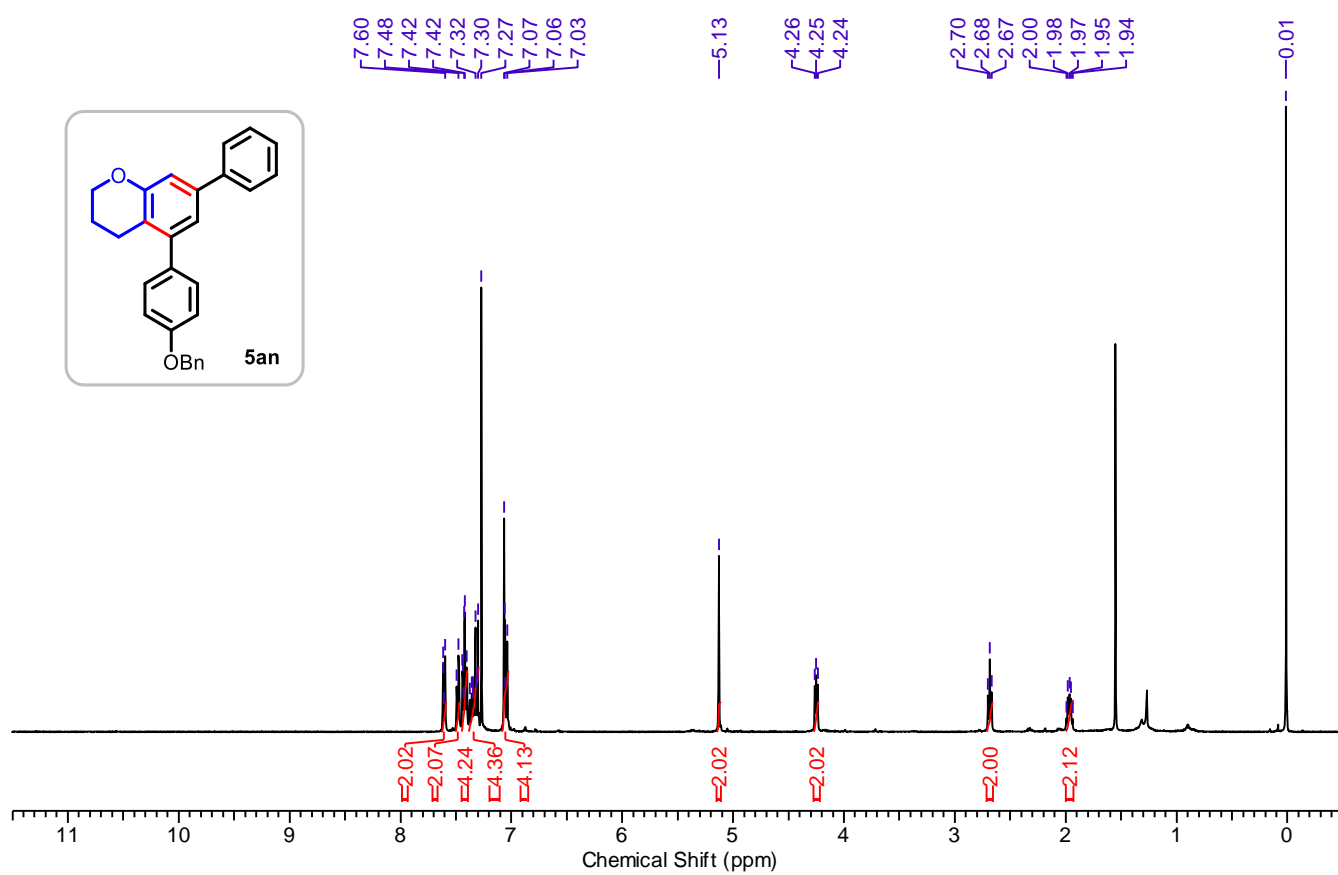<sup>13</sup>C NMR-Spectrum (101 MHz, CDCl<sub>3</sub>) of **5an**: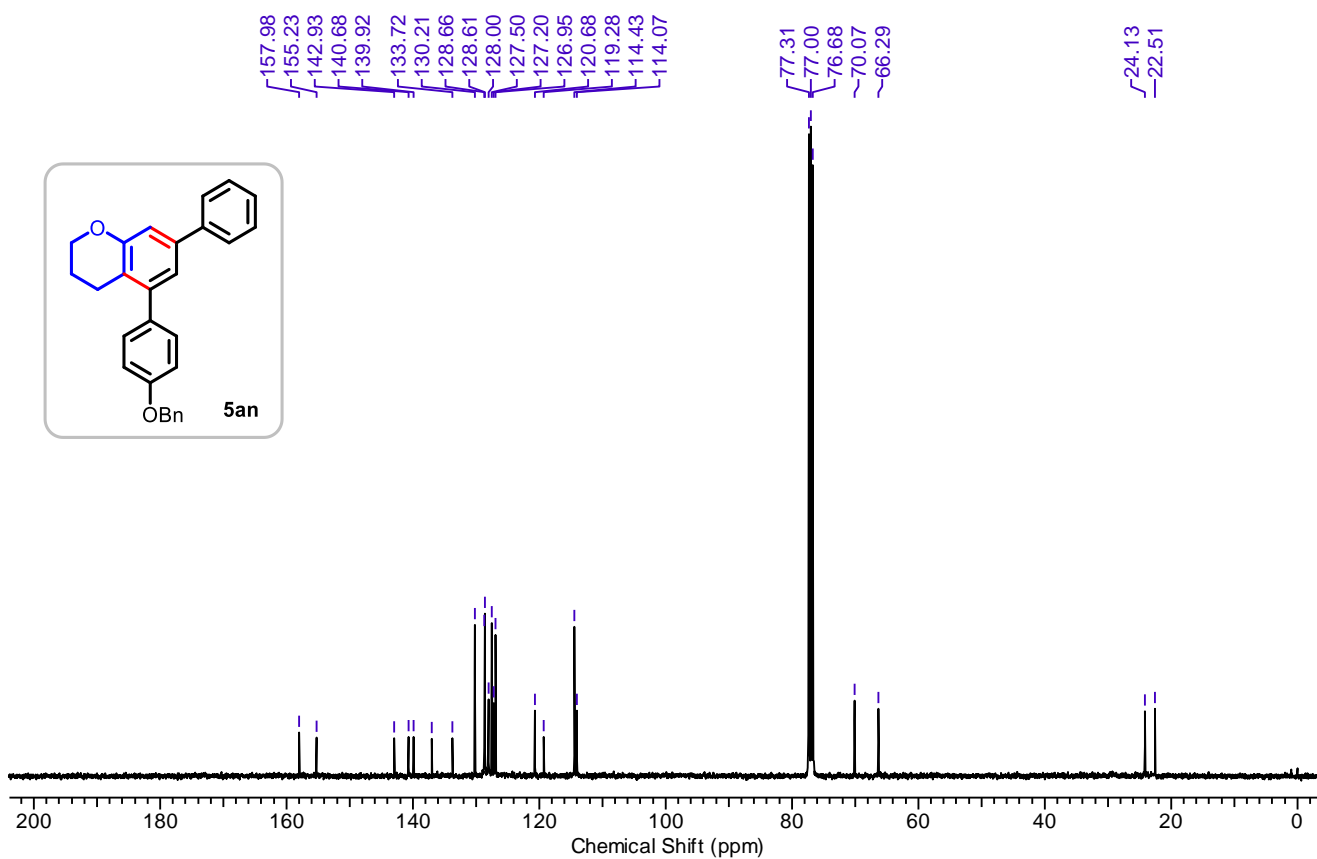



<sup>1</sup>H NMR-Spectrum (400 MHz, CDCl<sub>3</sub>) of **5ao**: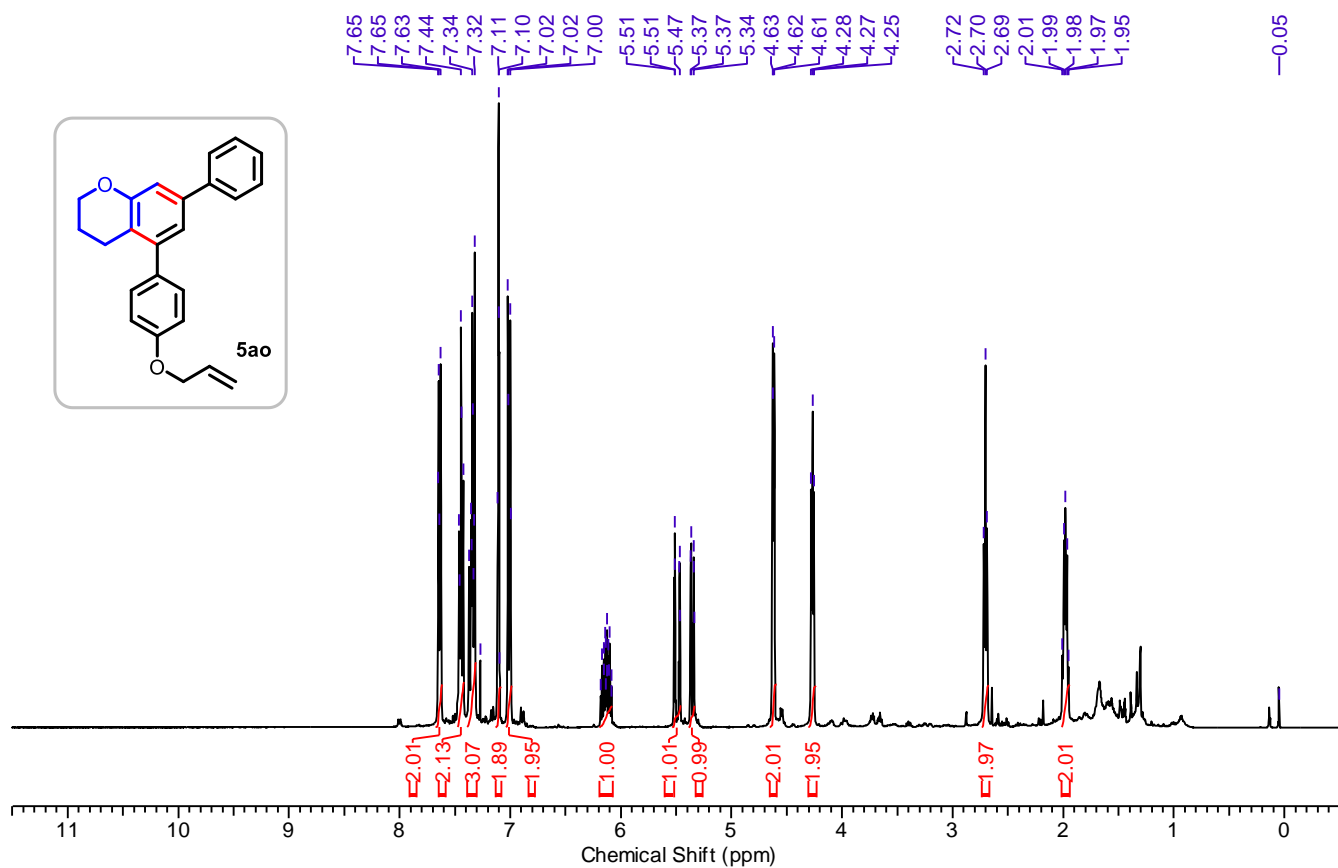<sup>13</sup>C NMR-Spectrum (101 MHz, CDCl<sub>3</sub>) of **5ao**: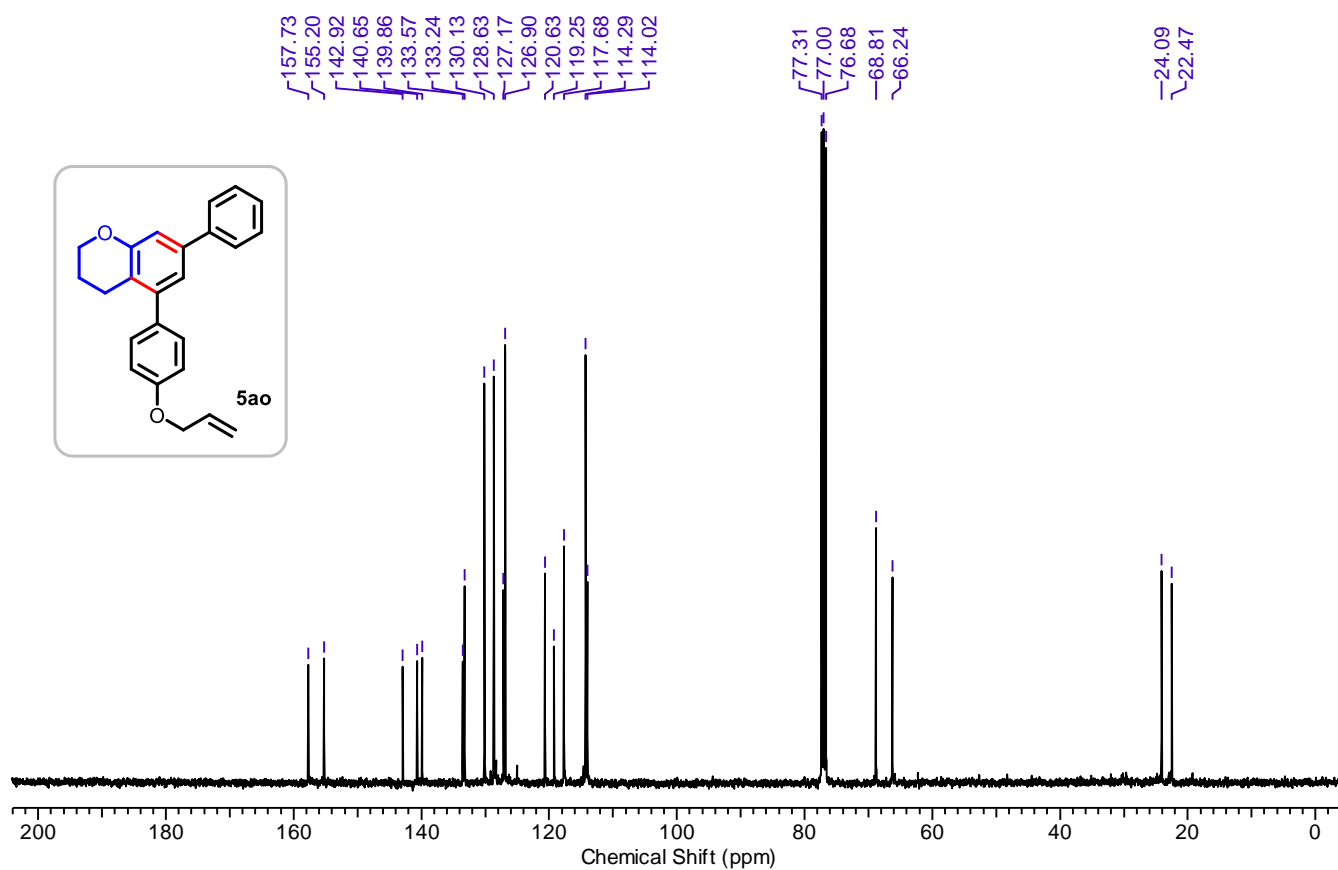

<sup>1</sup>H NMR-Spectrum (400 MHz, CDCl<sub>3</sub>) of **5ap**: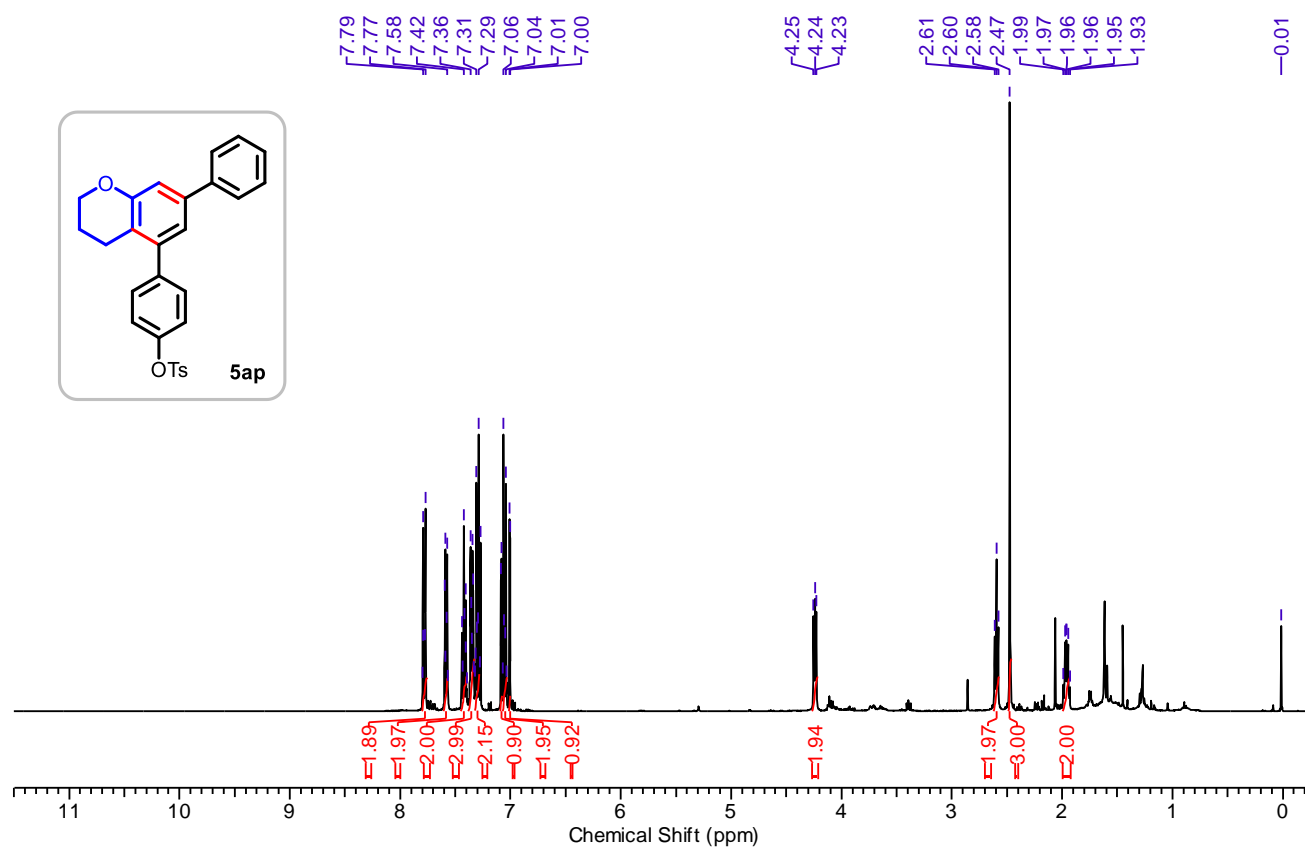<sup>13</sup>C NMR-Spectrum (101 MHz, CDCl<sub>3</sub>) of **5ap**: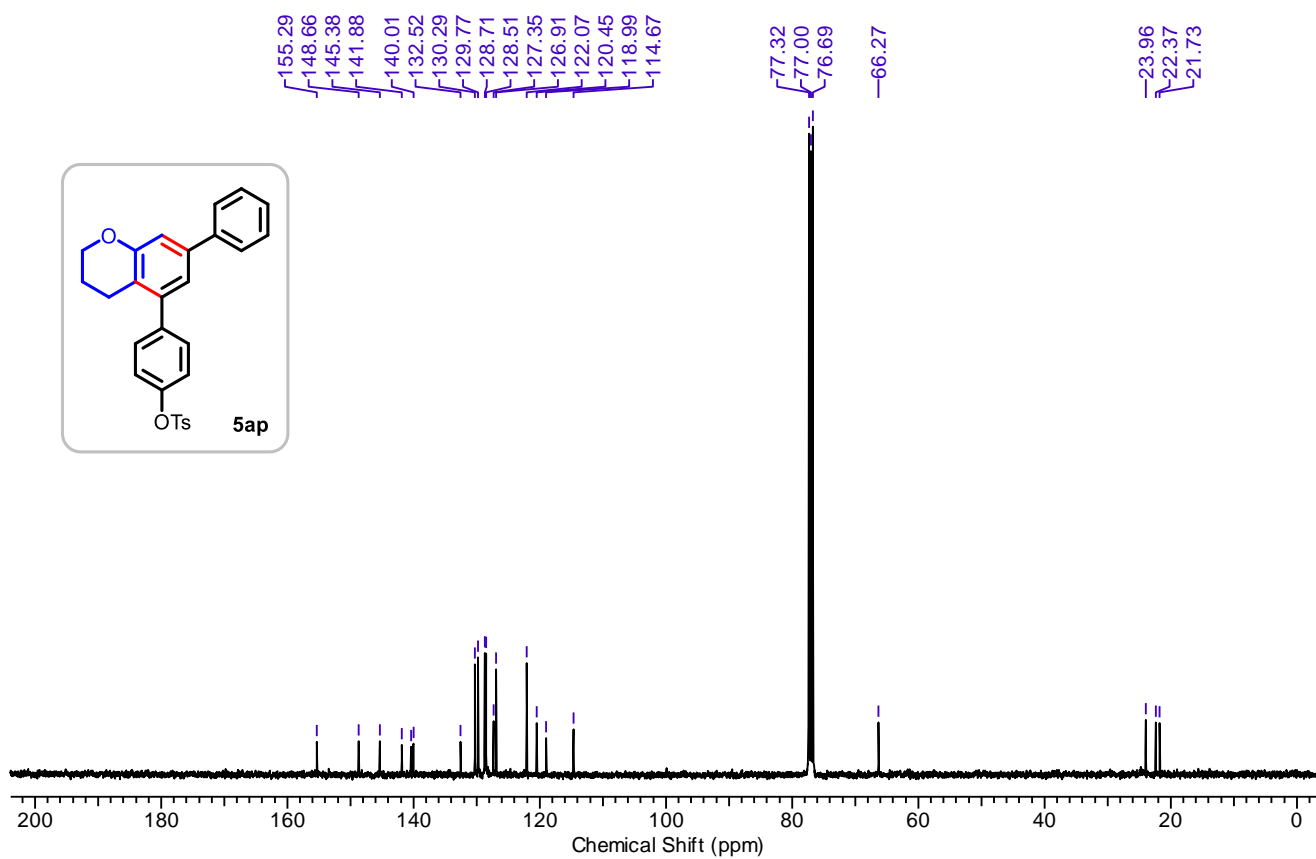

<sup>1</sup>H NMR-Spectrum (400 MHz, CDCl<sub>3</sub>) of **5aq**: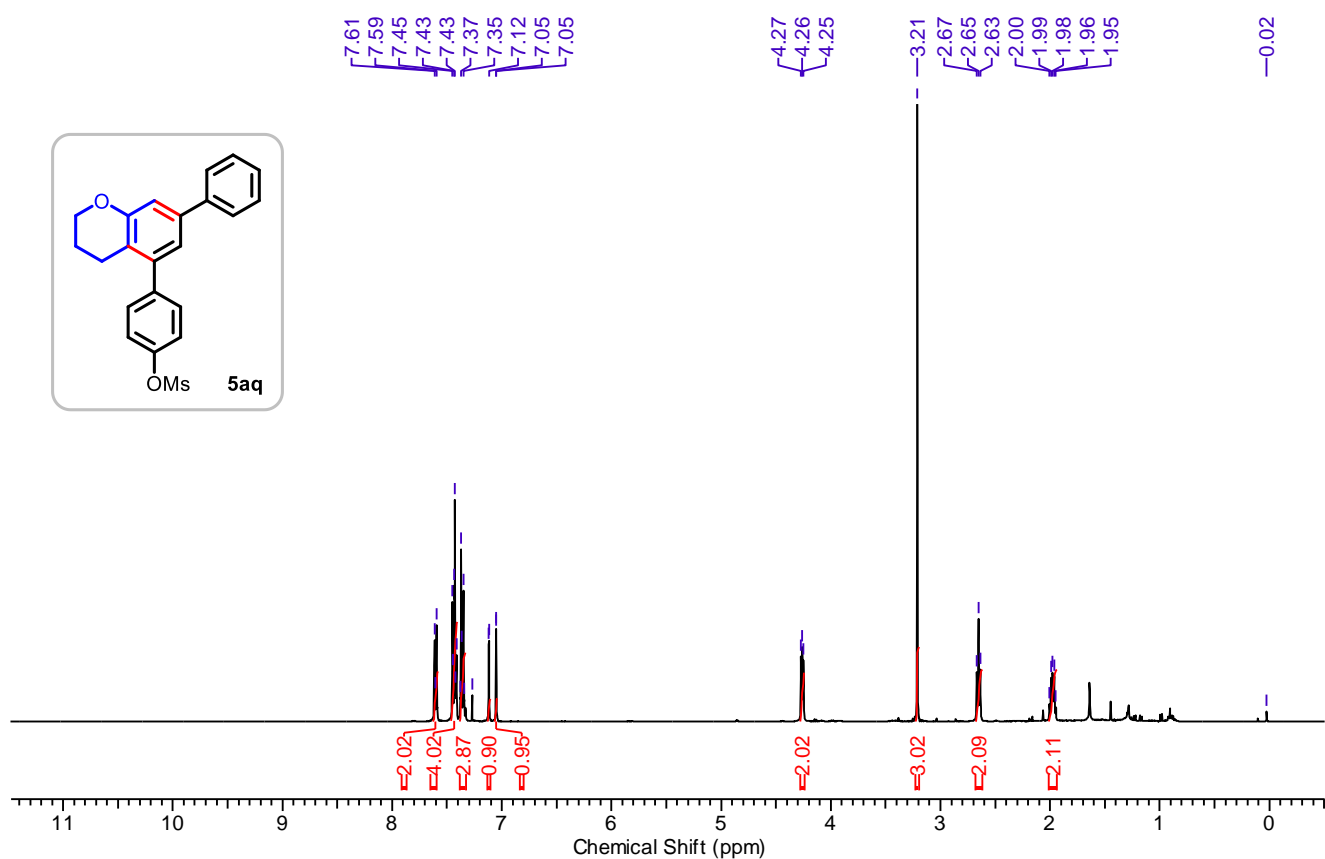<sup>13</sup>C NMR-Spectrum (101 MHz, CDCl<sub>3</sub>) of **5aq**: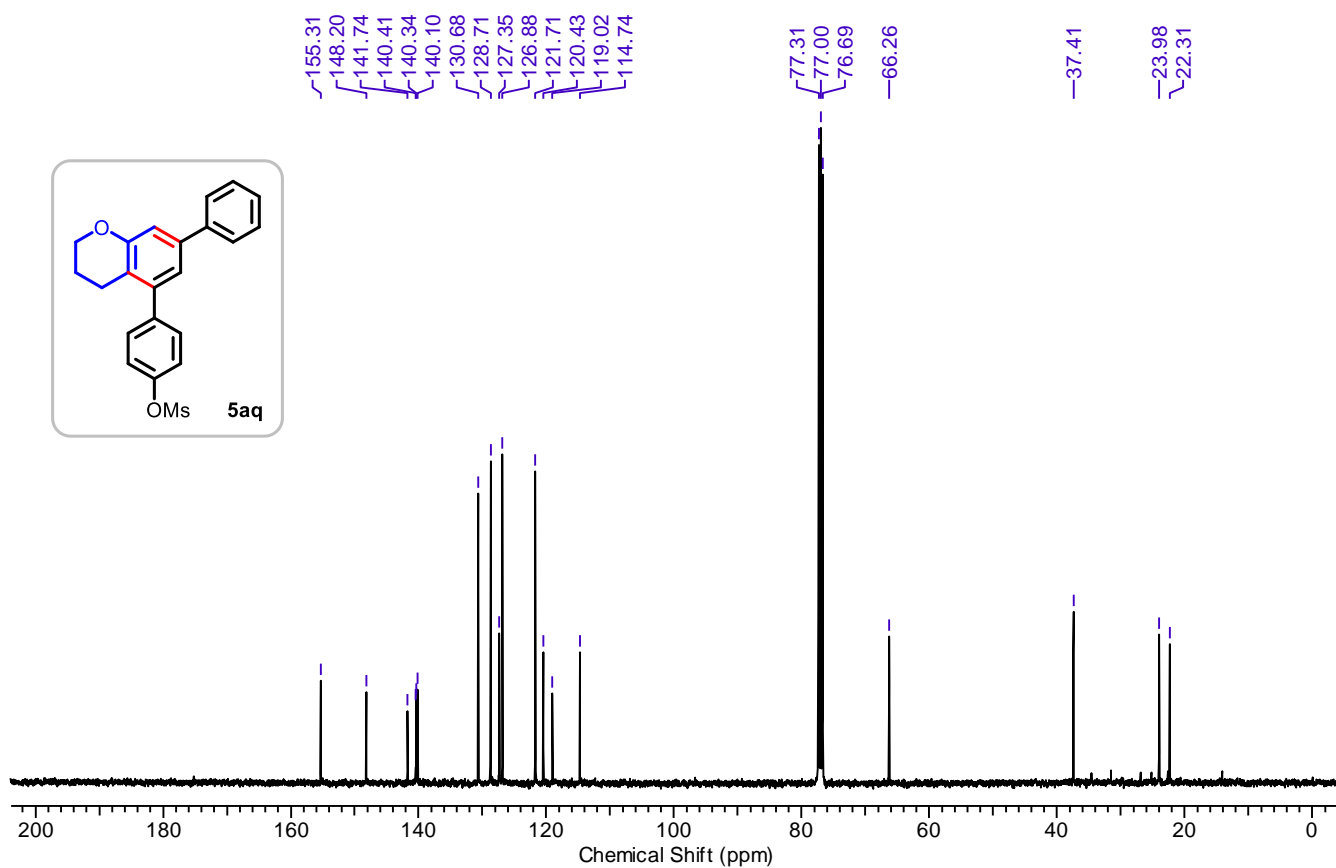

<sup>1</sup>H NMR-Spectrum (400 MHz, CDCl<sub>3</sub>) of **5ar**: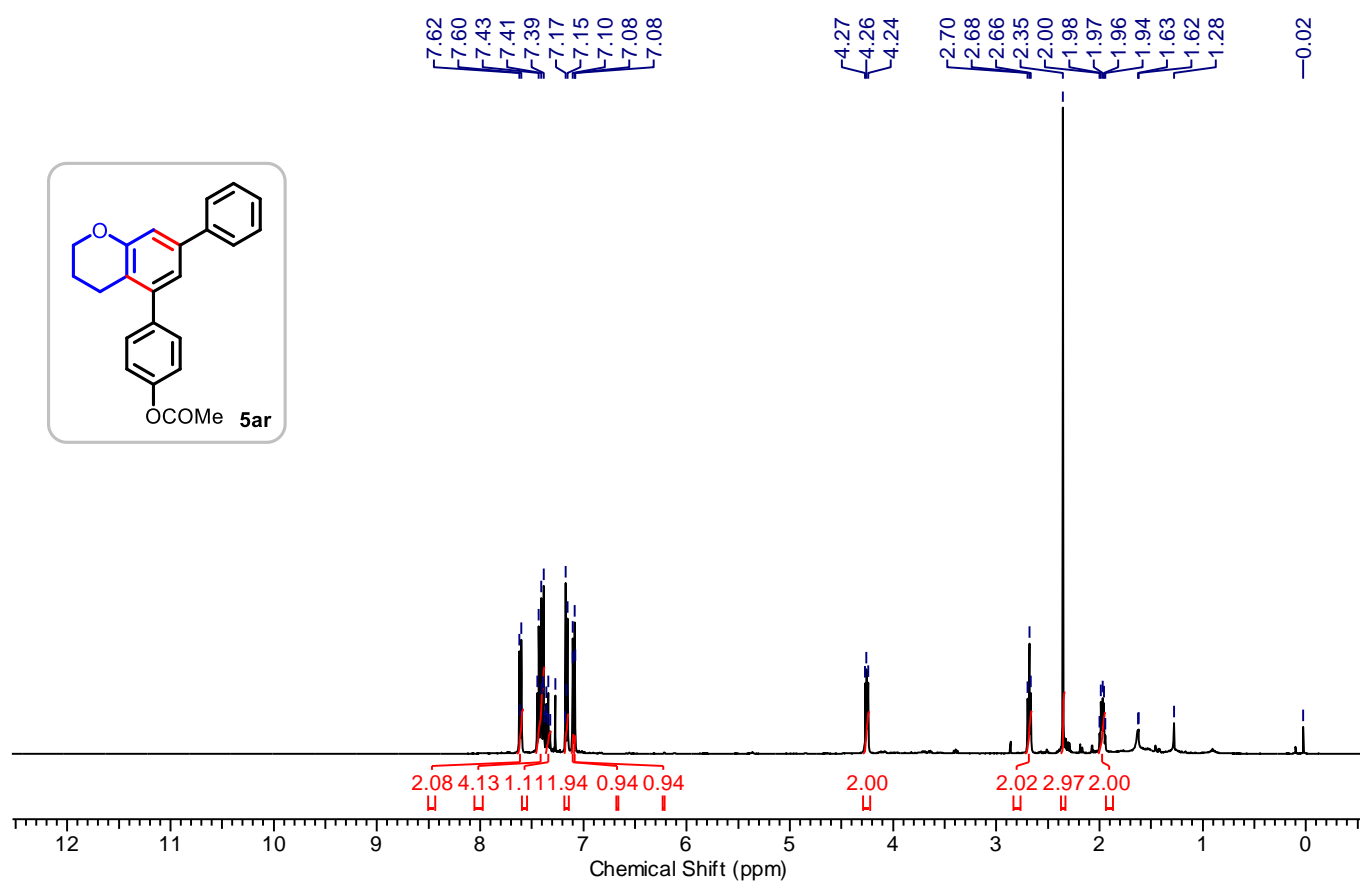<sup>13</sup>C NMR-Spectrum (101 MHz, CDCl<sub>3</sub>) of **5ar**: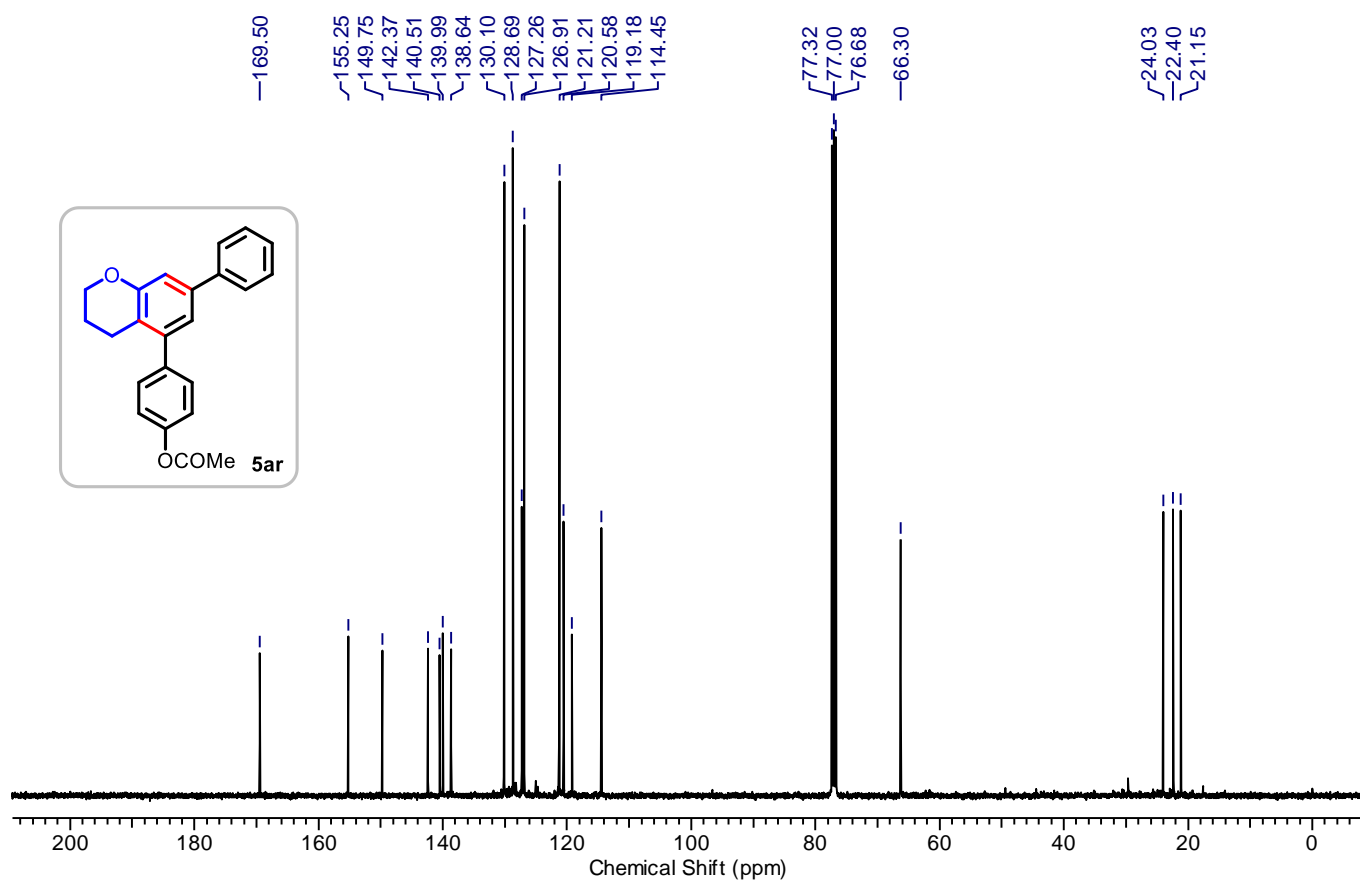

<sup>1</sup>H NMR-Spectrum (400 MHz, CDCl<sub>3</sub>) of **5as**:

AV-400-20190506-165918-11681\_PROTON-3.esp

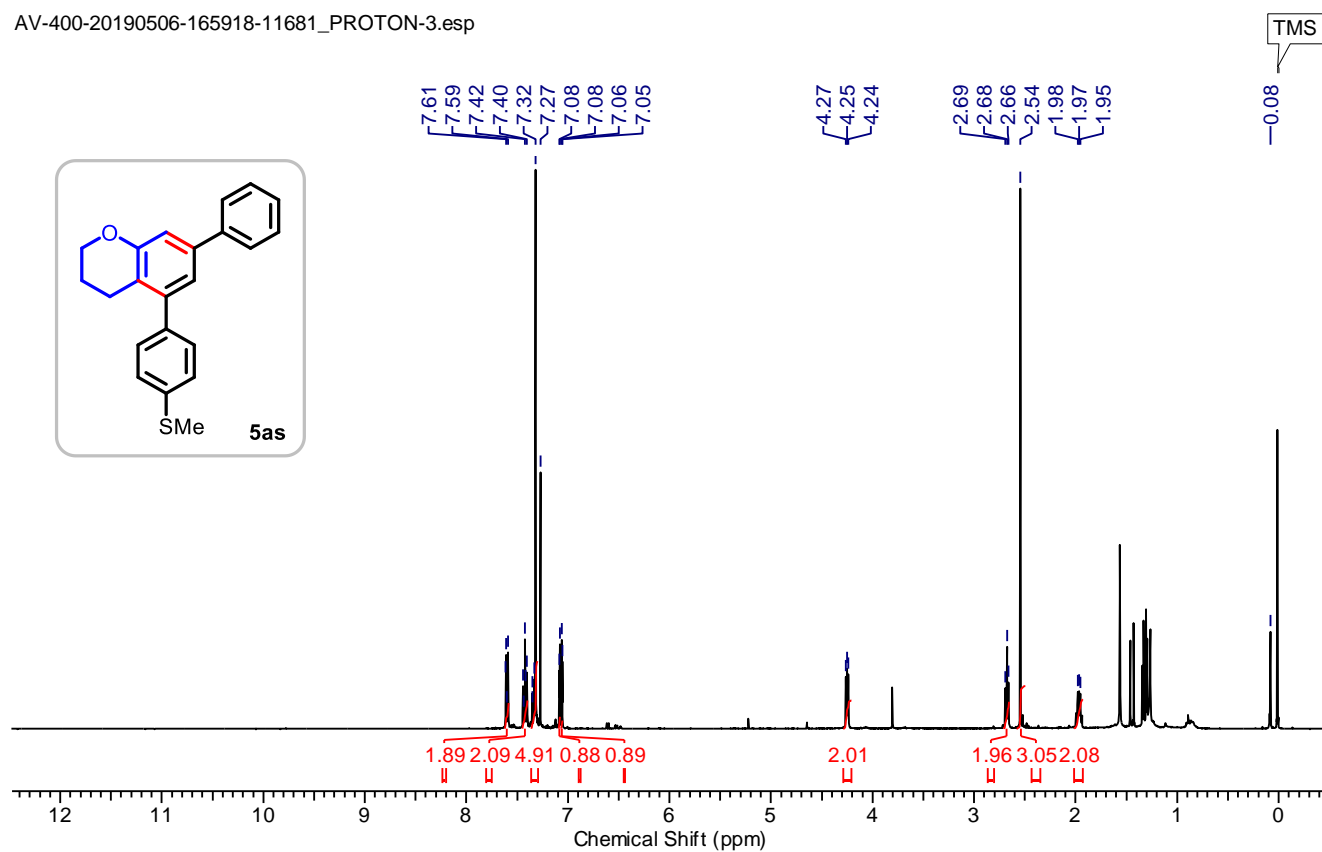<sup>13</sup>C NMR-Spectrum (101 MHz, CDCl<sub>3</sub>) of **5as**:

AV-400-20190506-165918-11681\_

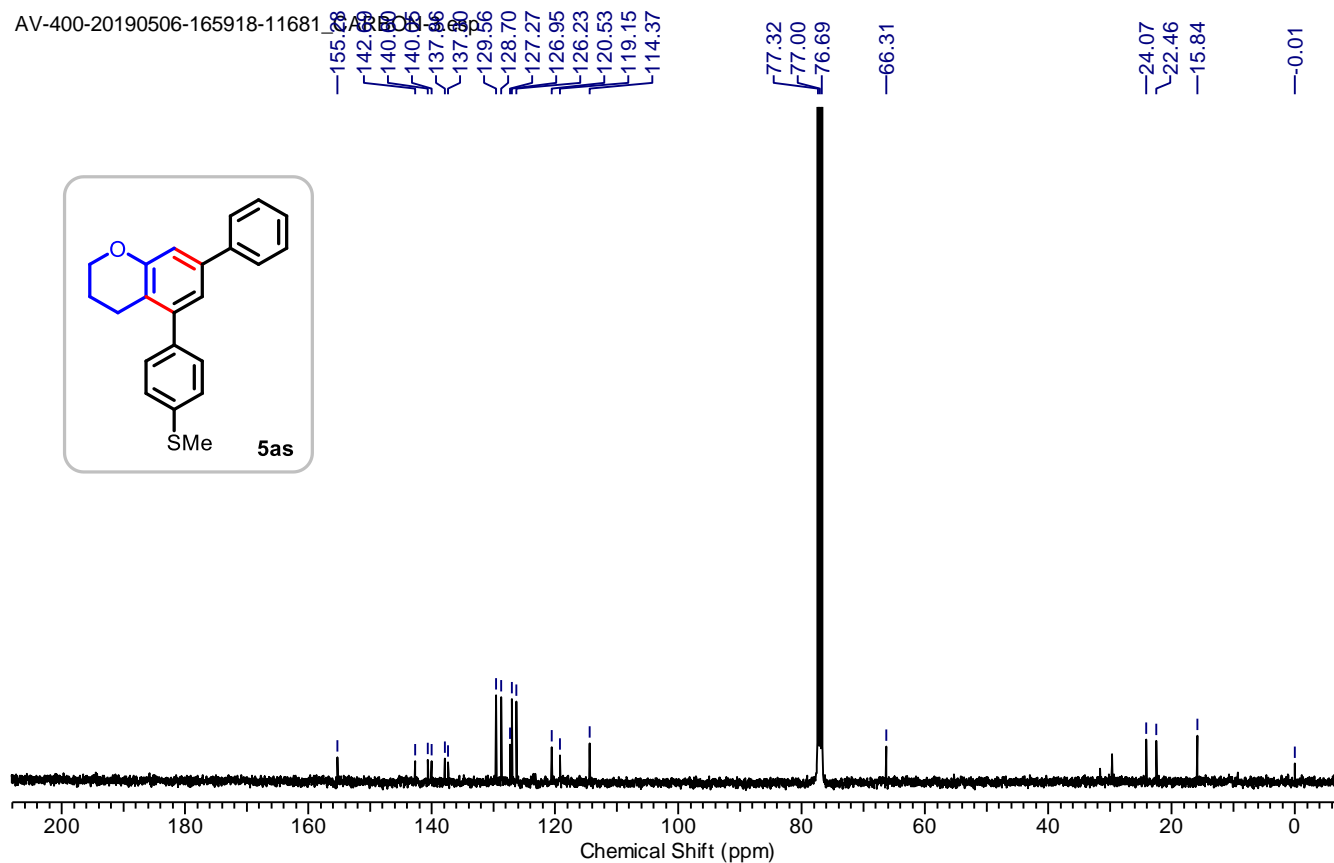

<sup>1</sup>H NMR-Spectrum (400 MHz, CDCl<sub>3</sub>) of **5at**: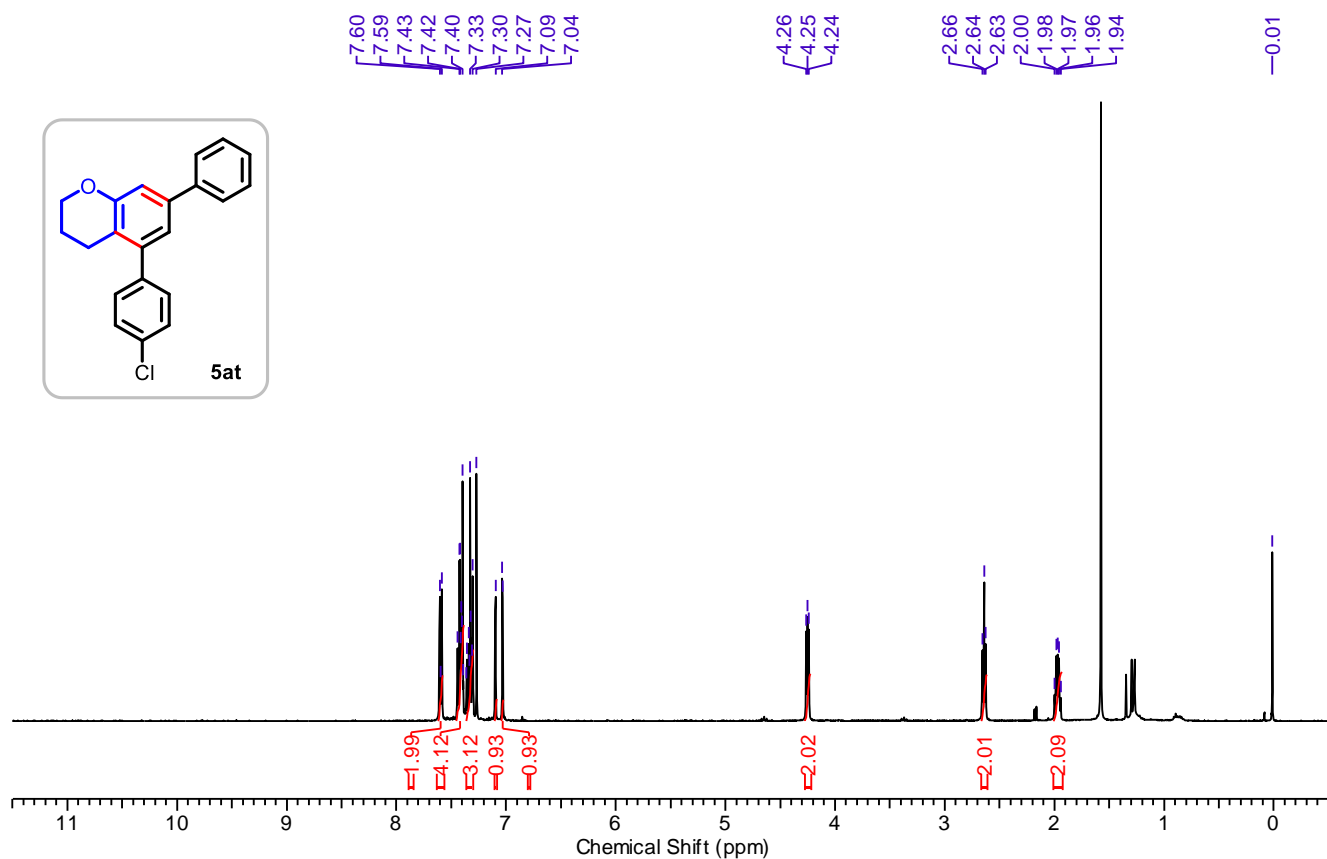<sup>13</sup>C NMR-Spectrum (126 MHz, CDCl<sub>3</sub>) of **5at**: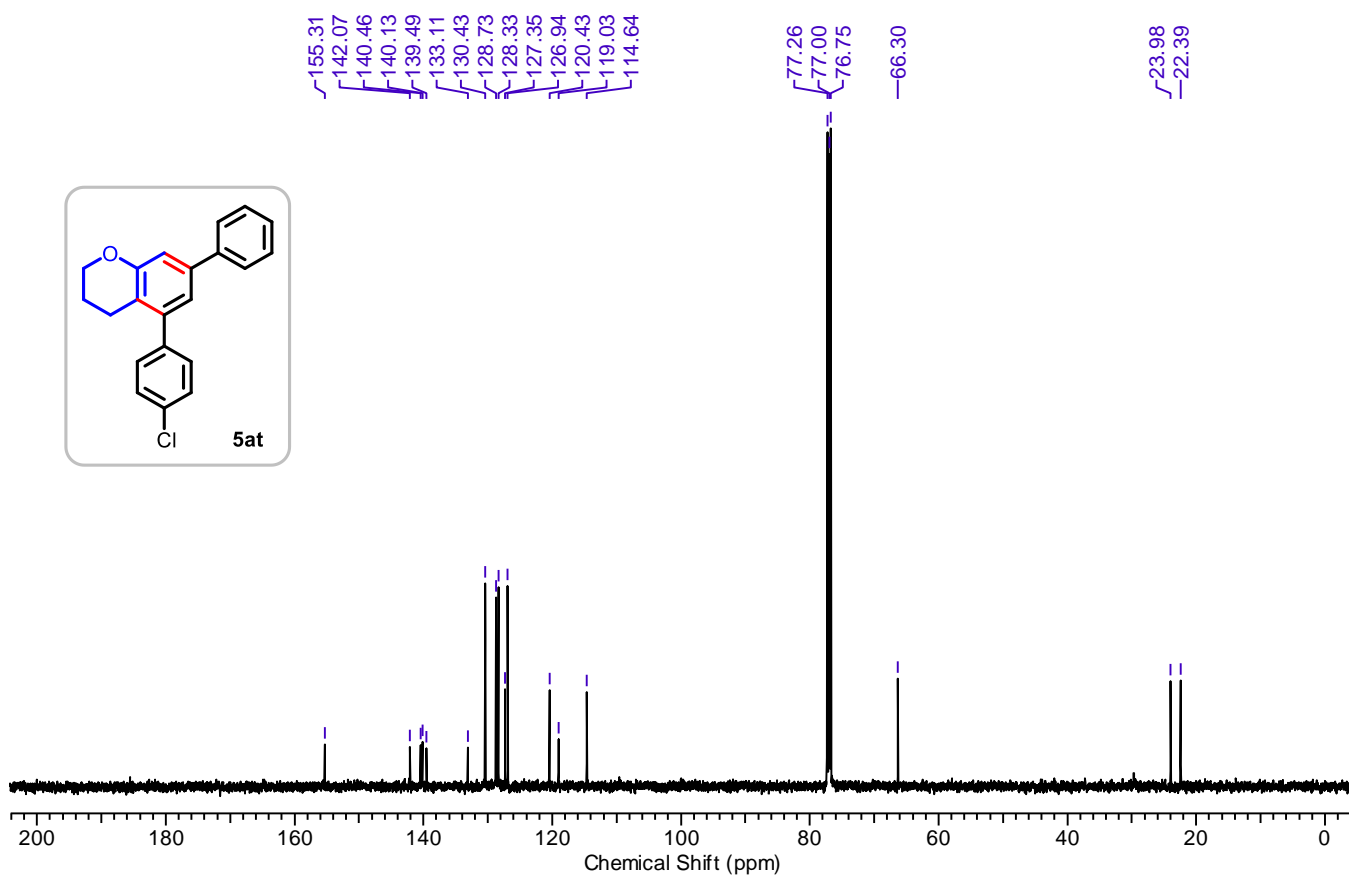

<sup>1</sup>H NMR-Spectrum (400 MHz, CDCl<sub>3</sub>) of **5au**: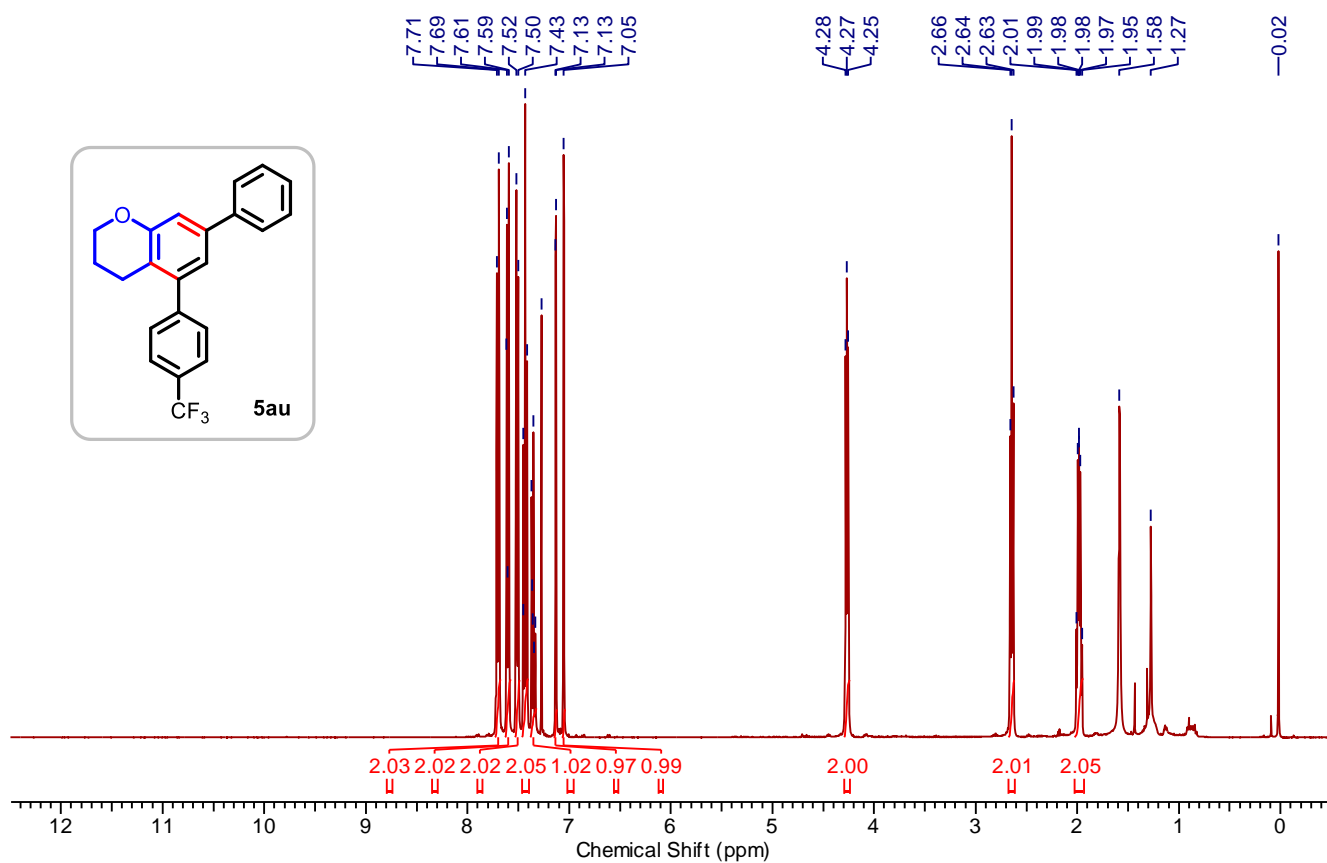<sup>13</sup>C NMR-Spectrum (101 MHz, CDCl<sub>3</sub>) of **5au**: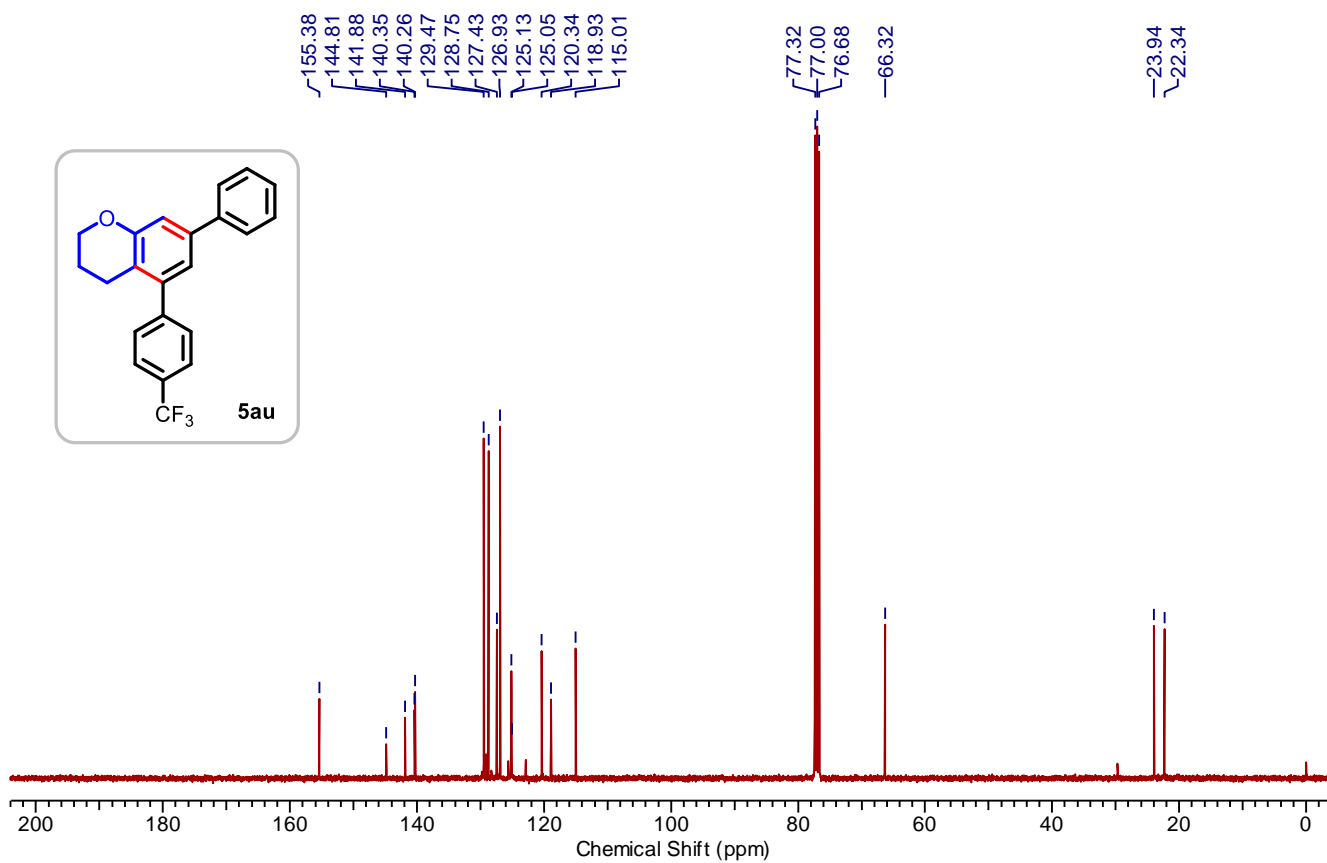

$^1\text{H}$  NMR-Spectrum (400 MHz,  $\text{CDCl}_3$ ) of **5av**:

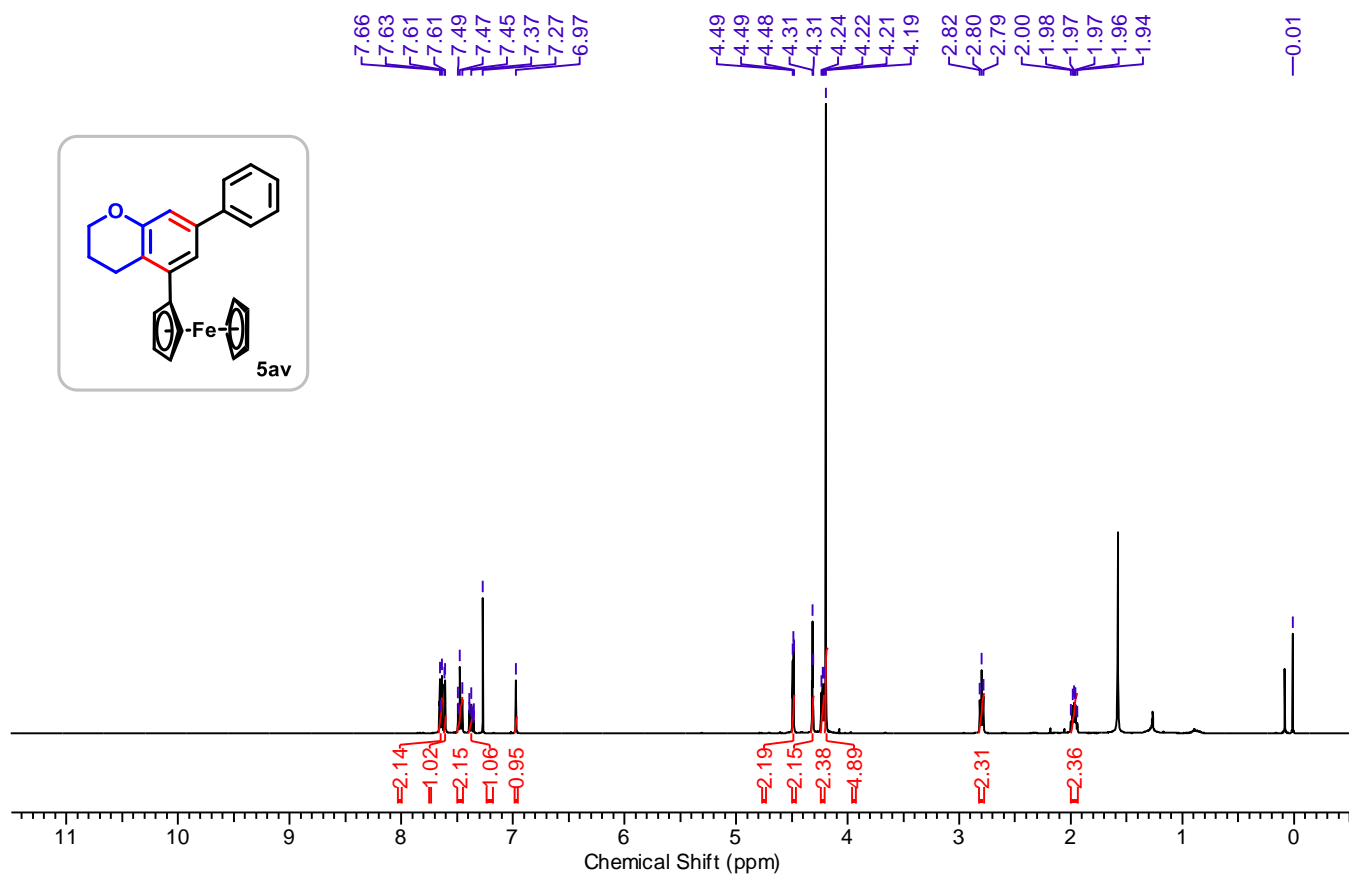

$^{13}\text{C}$  NMR-Spectrum (101 MHz,  $\text{CDCl}_3$ ) of **5av**:

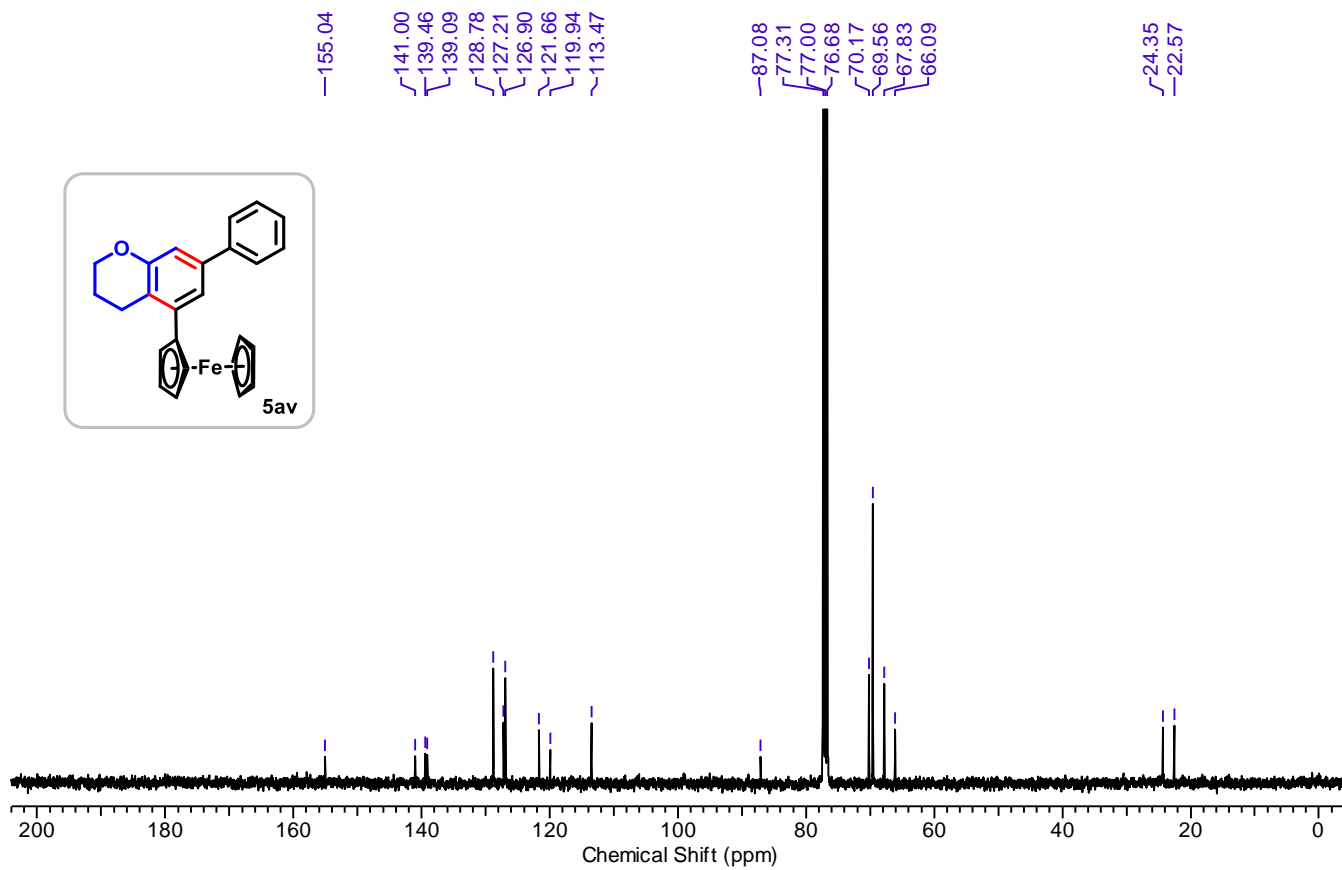



<sup>1</sup>H NMR-Spectrum (400 MHz, CDCl<sub>3</sub>) of **5aw**: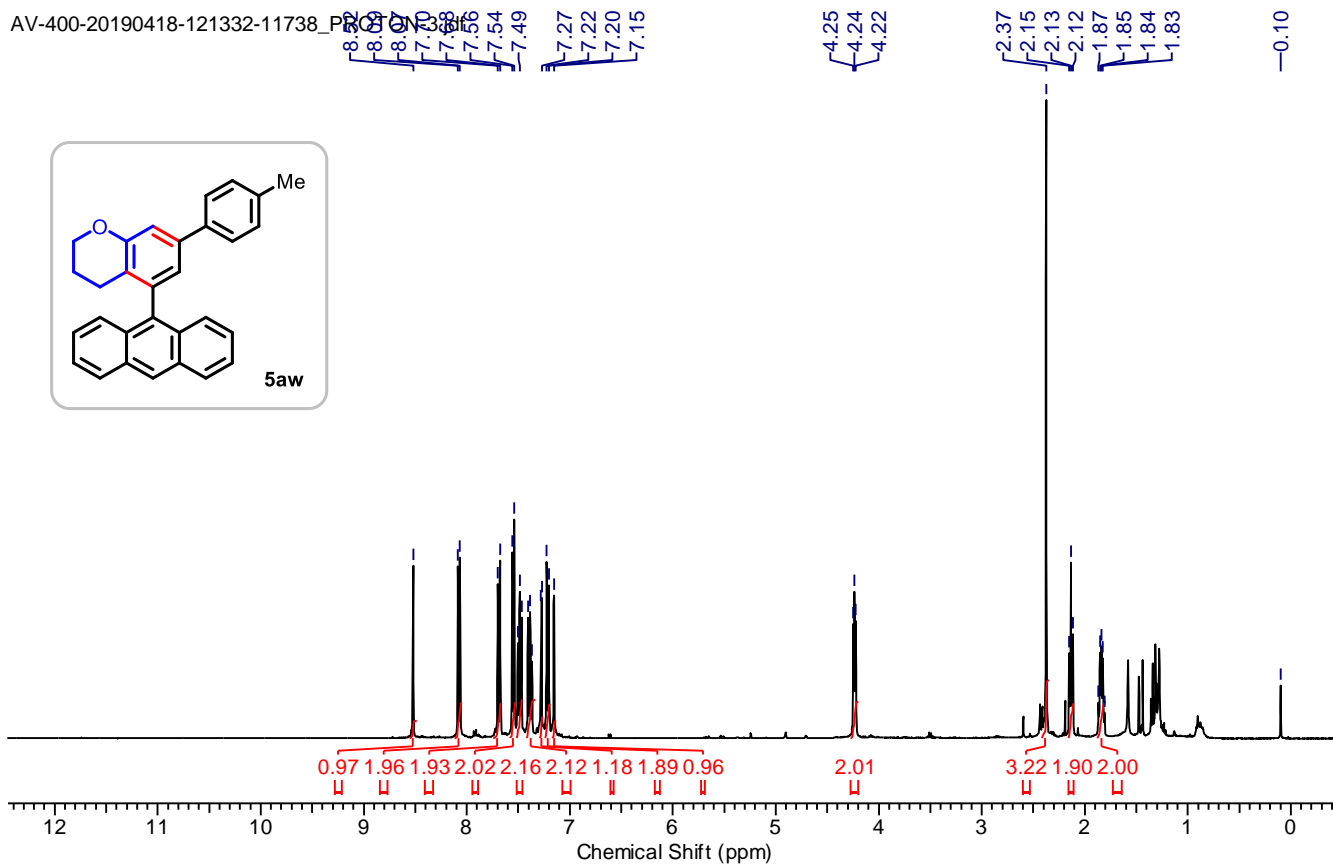<sup>13</sup>C NMR-Spectrum (101 MHz, CDCl<sub>3</sub>) of **5aw**: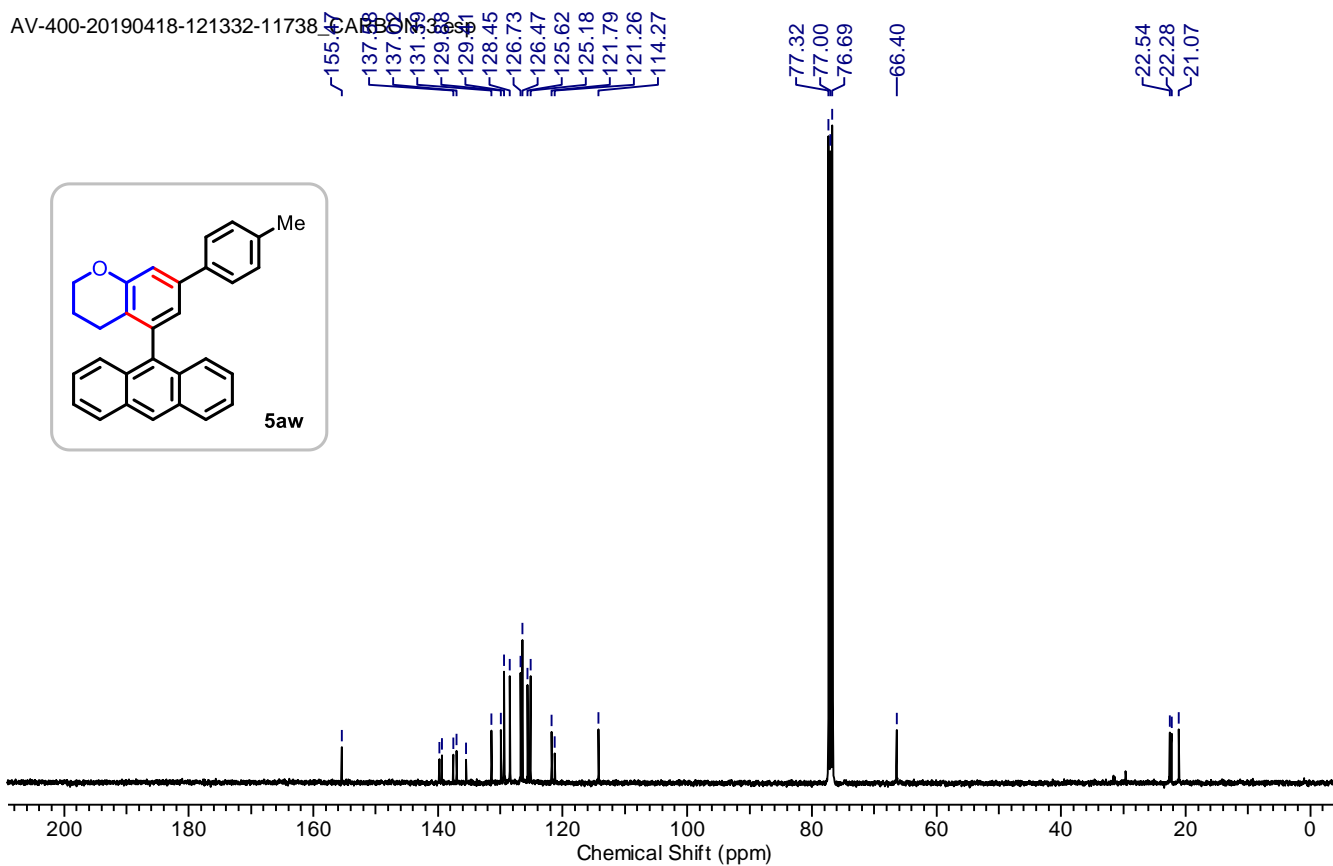

<sup>1</sup>H NMR-Spectrum (400 MHz, CDCl<sub>3</sub>) of **5ax**: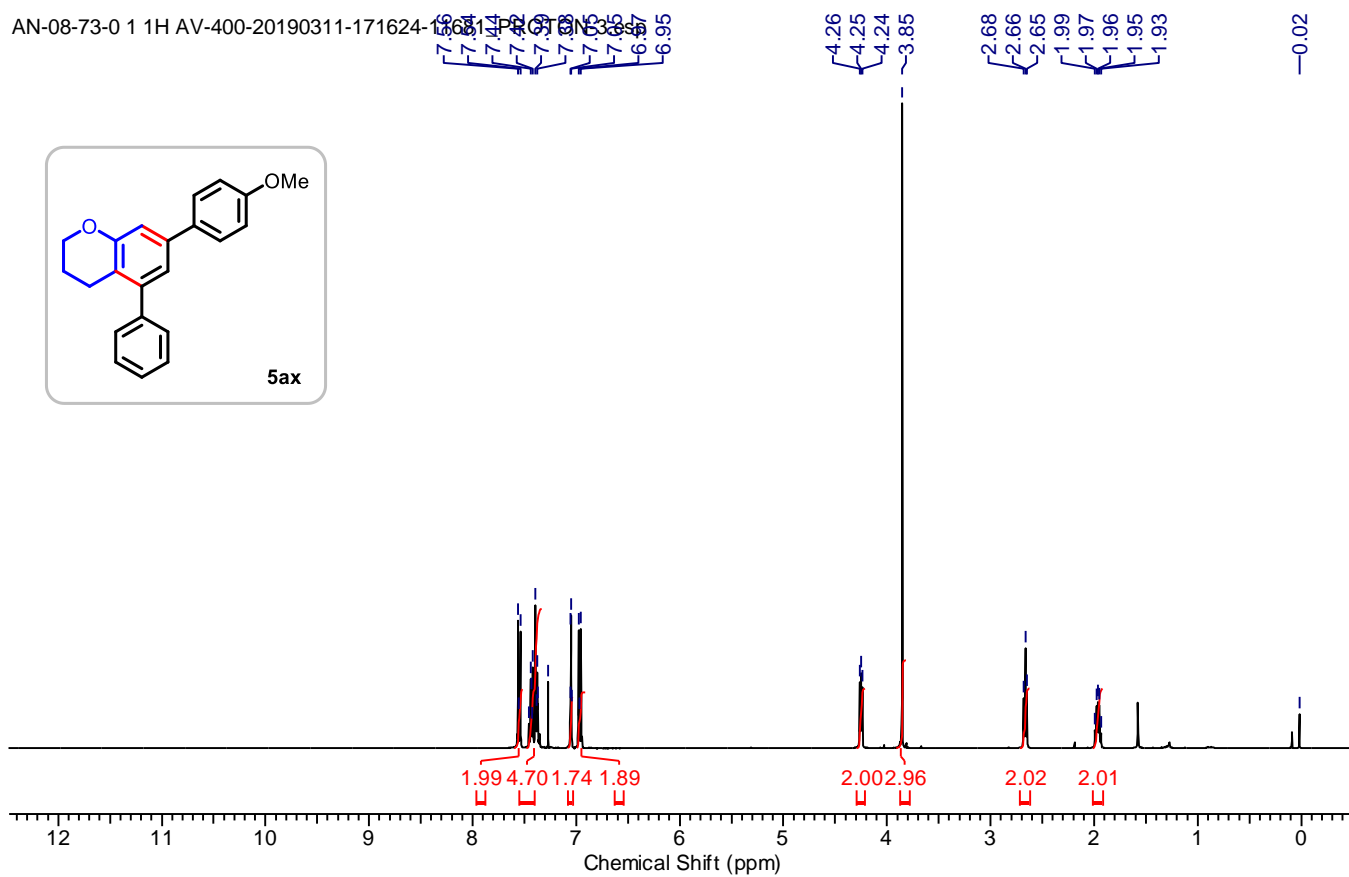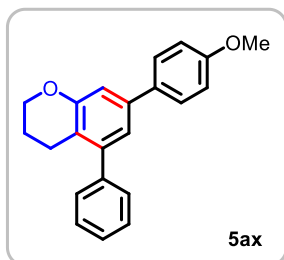<sup>13</sup>C NMR-Spectrum (101 MHz, CDCl<sub>3</sub>) of **5ax**: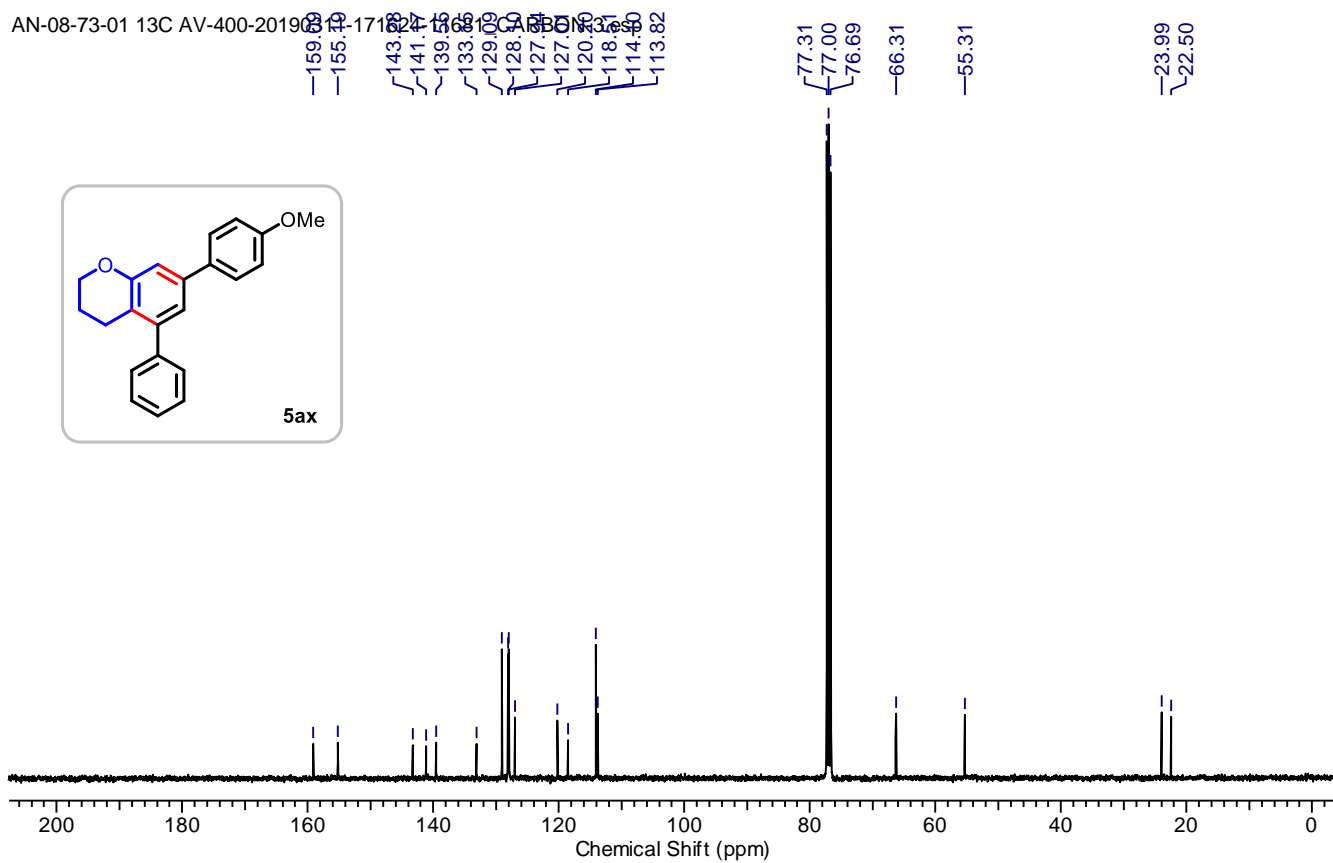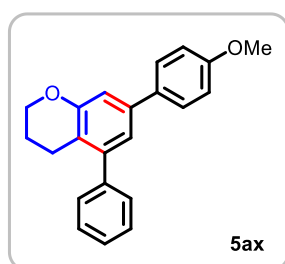

$^1\text{H}$  NMR-Spectrum (400 MHz,  $\text{CDCl}_3$ ) of **5ay**:

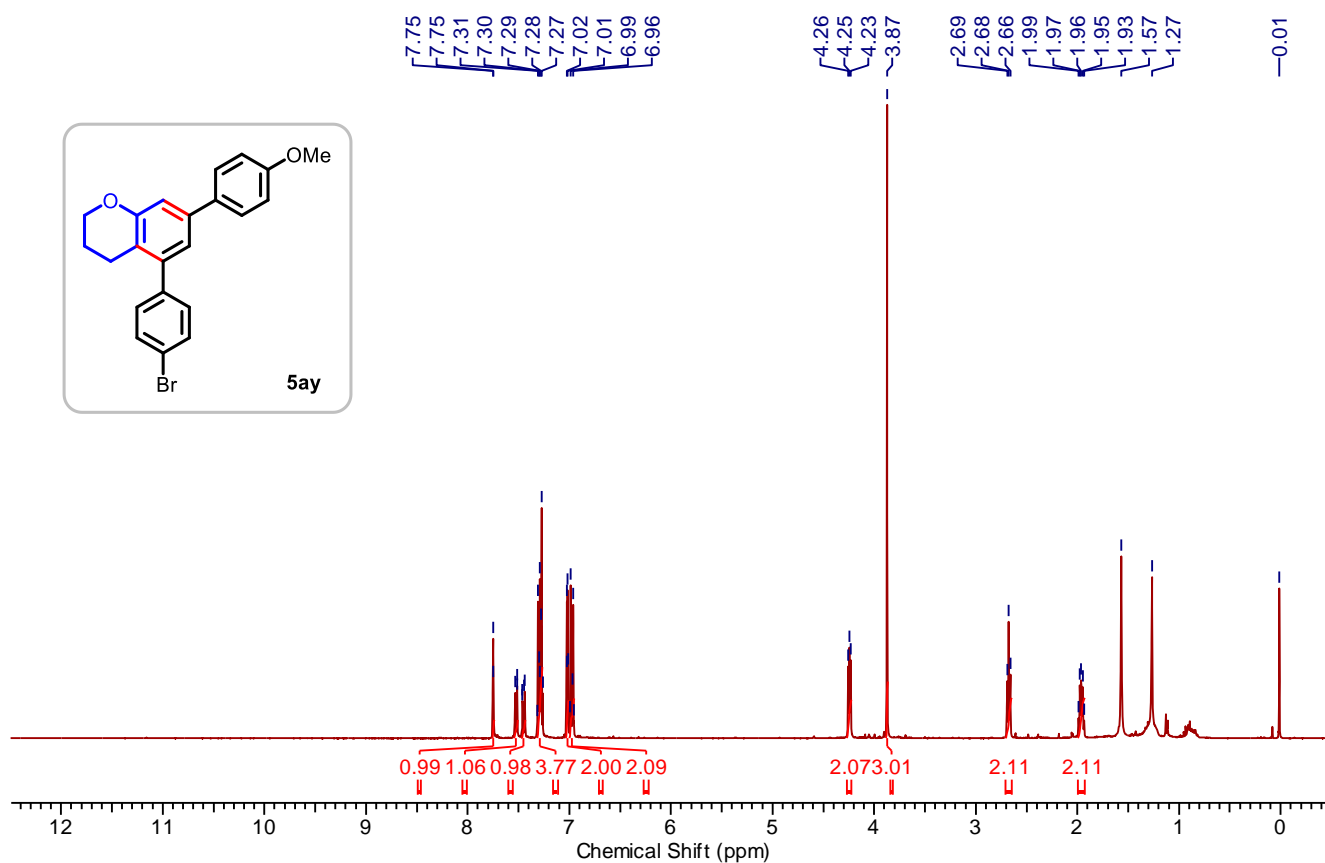

$^{13}\text{C}$  NMR-Spectrum (101 MHz,  $\text{CDCl}_3$ ) of **5ay**:

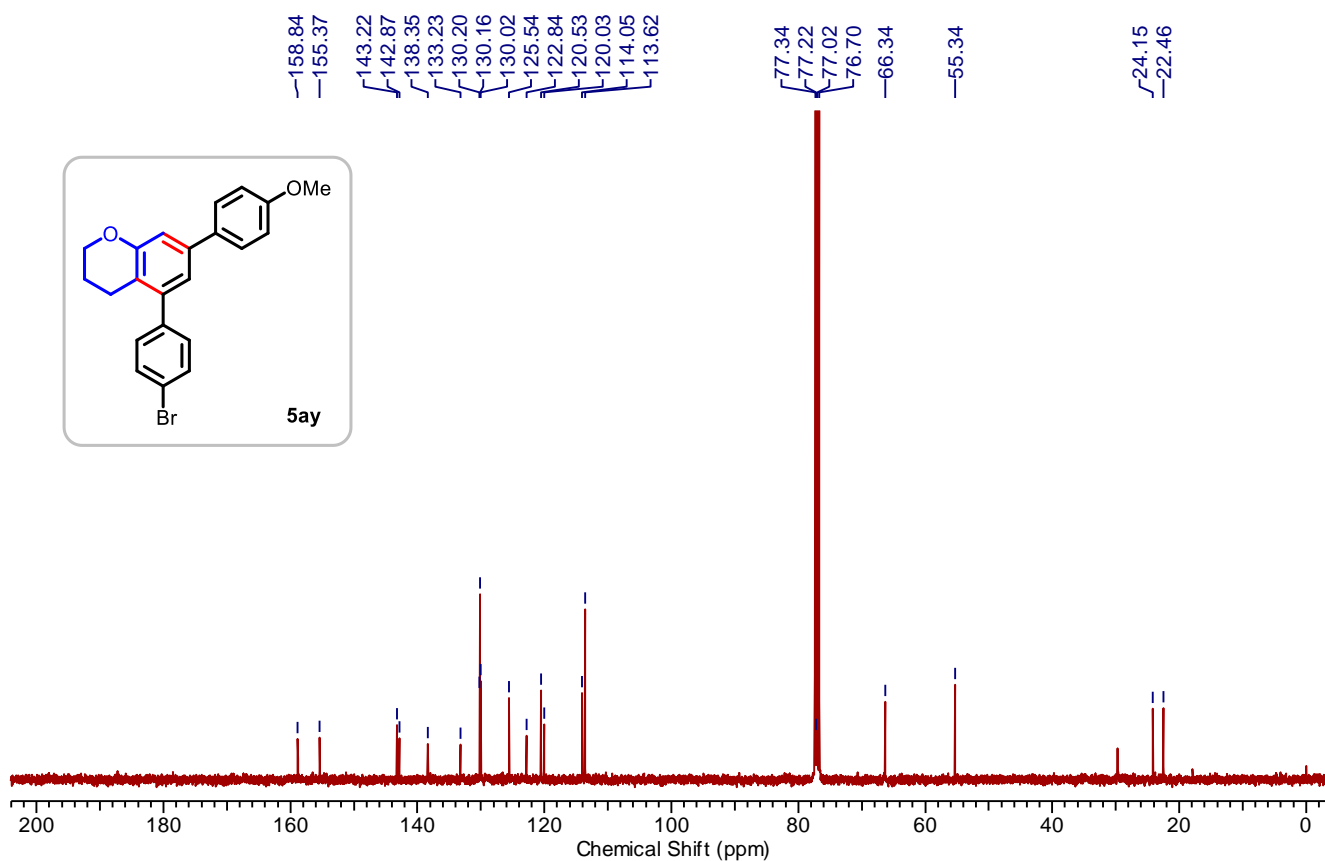

$^1\text{H}$  NMR-Spectrum (400MHz,  $\text{CDCl}_3$ ) of **5az**: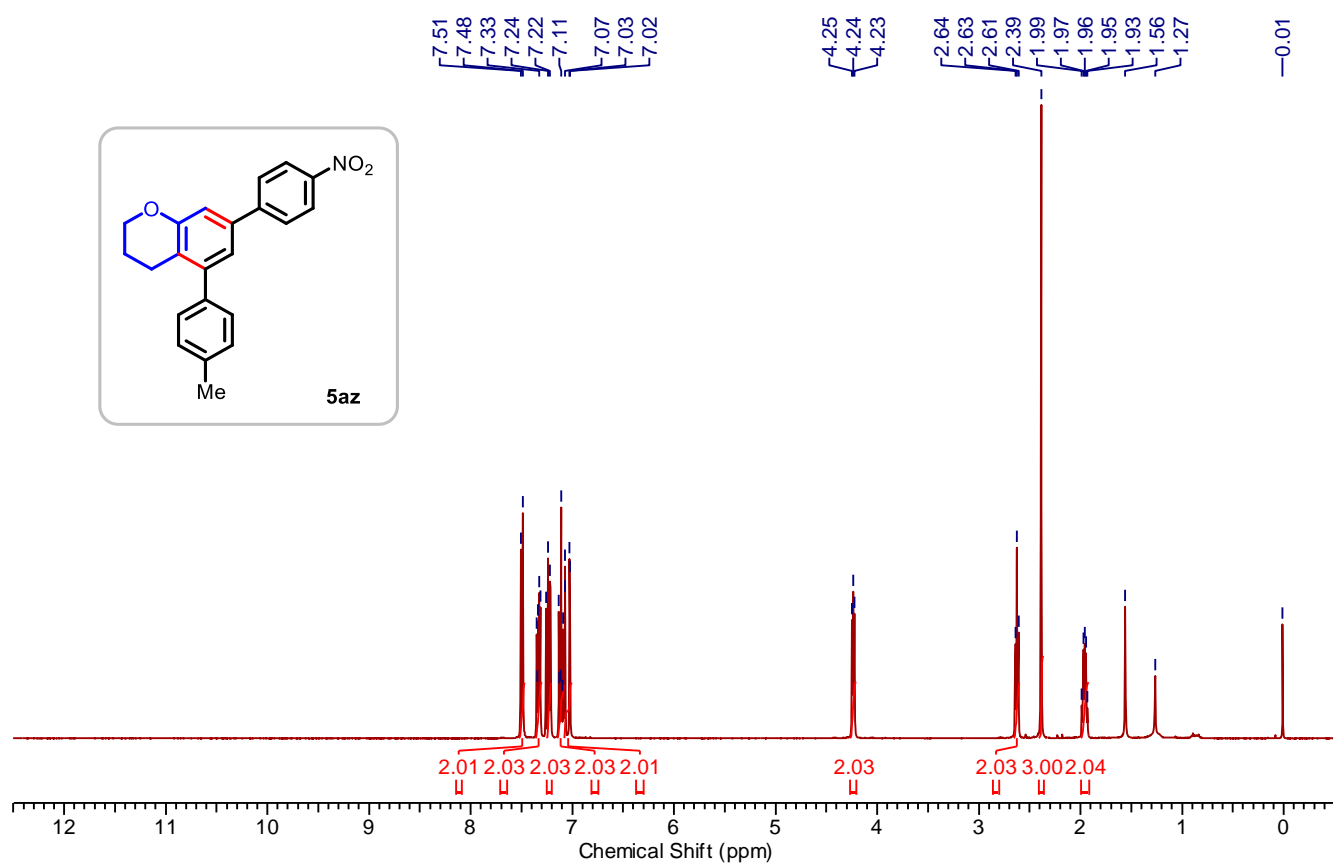 $^{13}\text{C}$  NMR-Spectrum (101 MHz,  $\text{CDCl}_3$ ) of **5az**: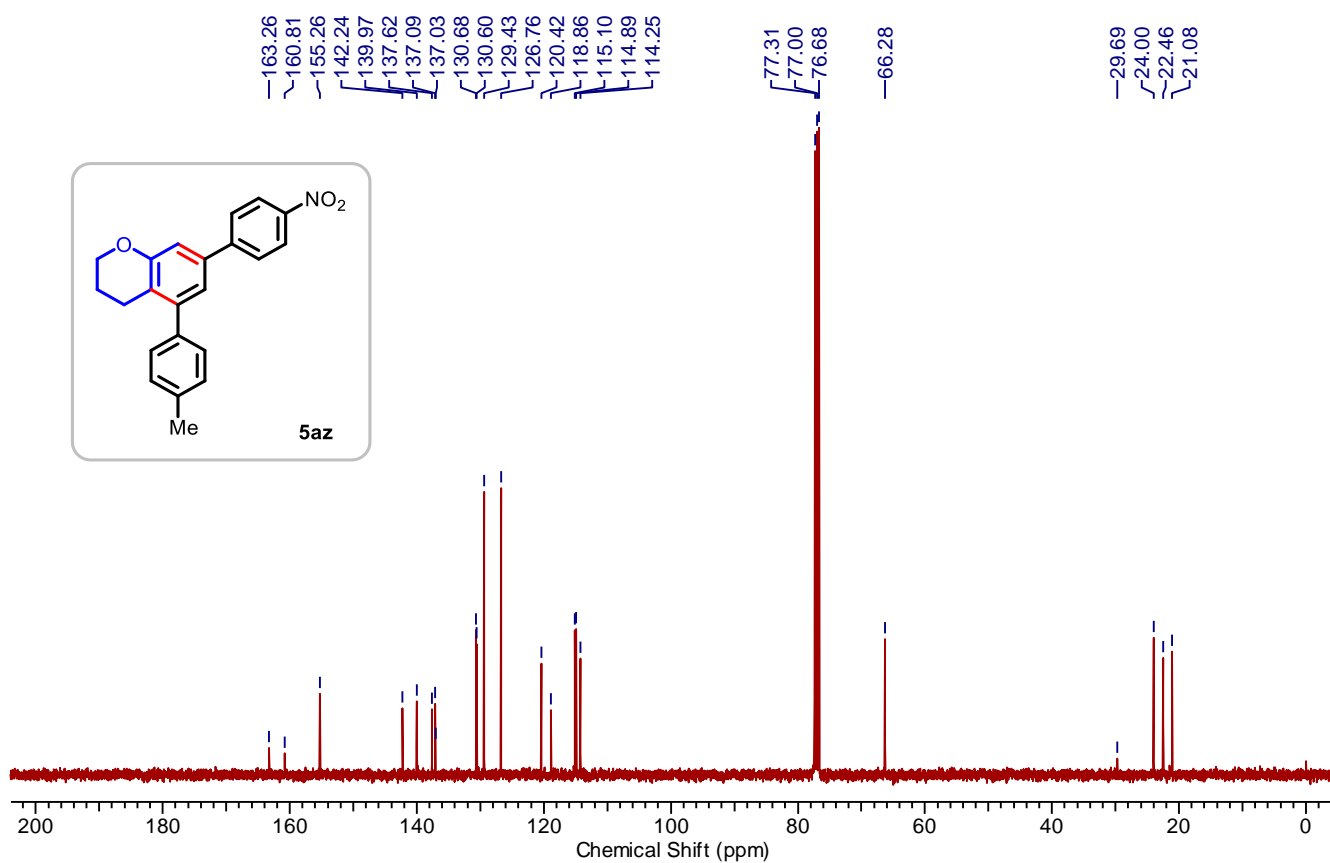

COSY Spectrum of **5az**: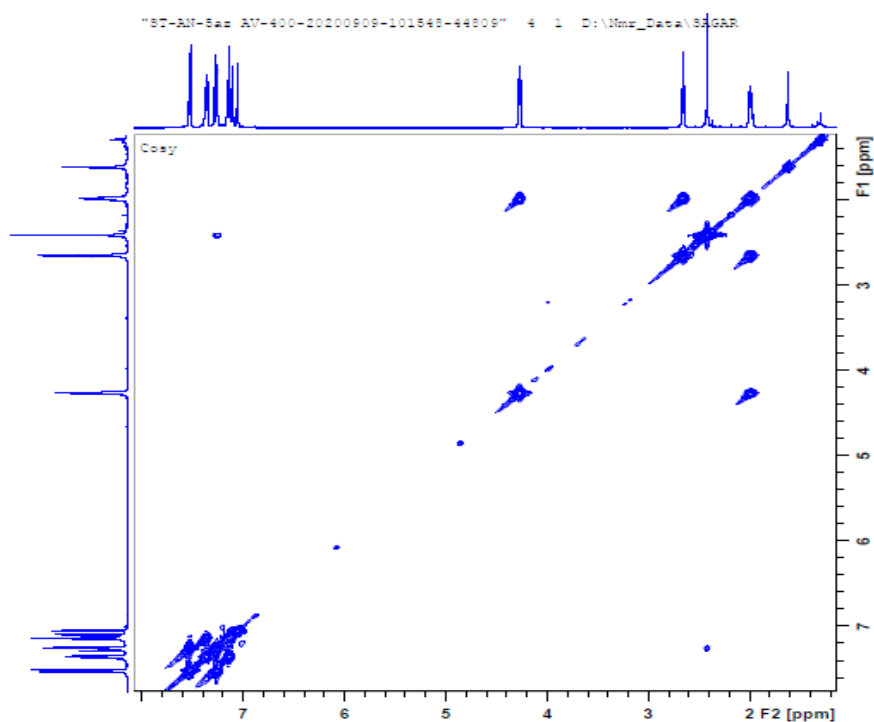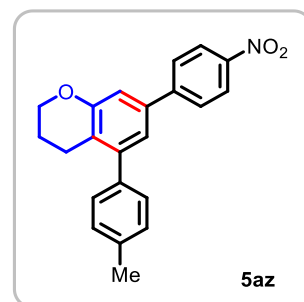HSQC Spectrum of **5az**: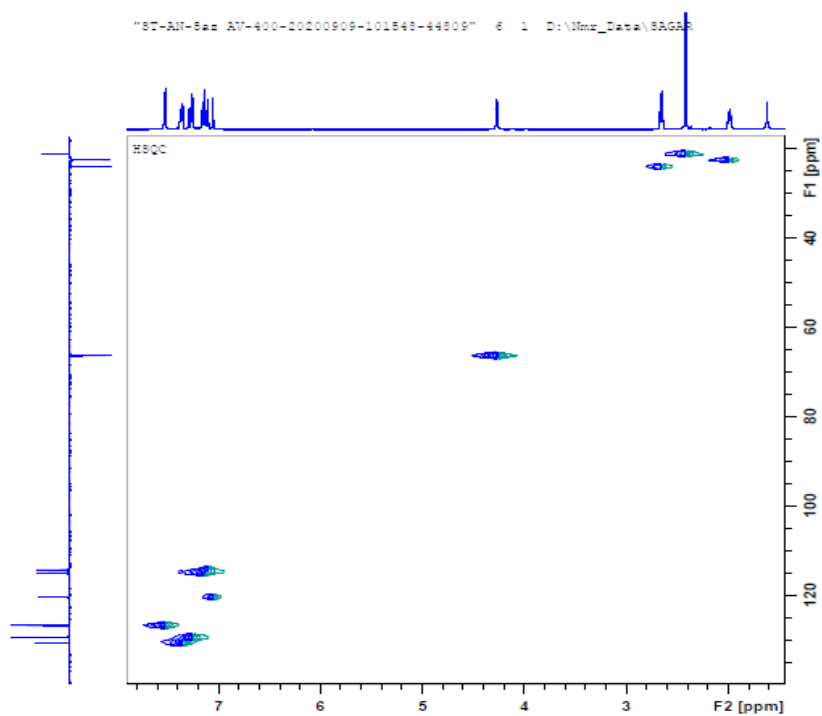

HMBC Spectrum of **5az**: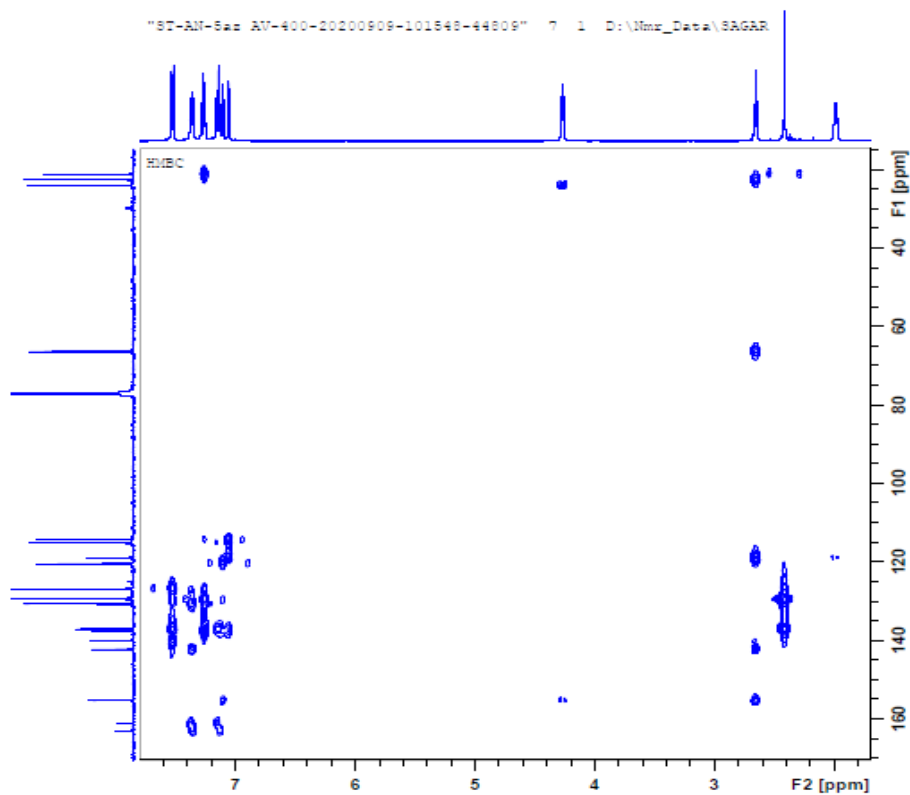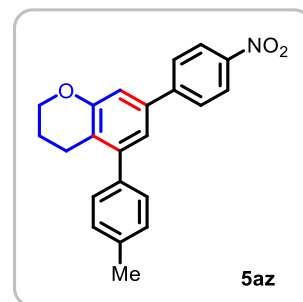NOESY Spectrum of **5az**: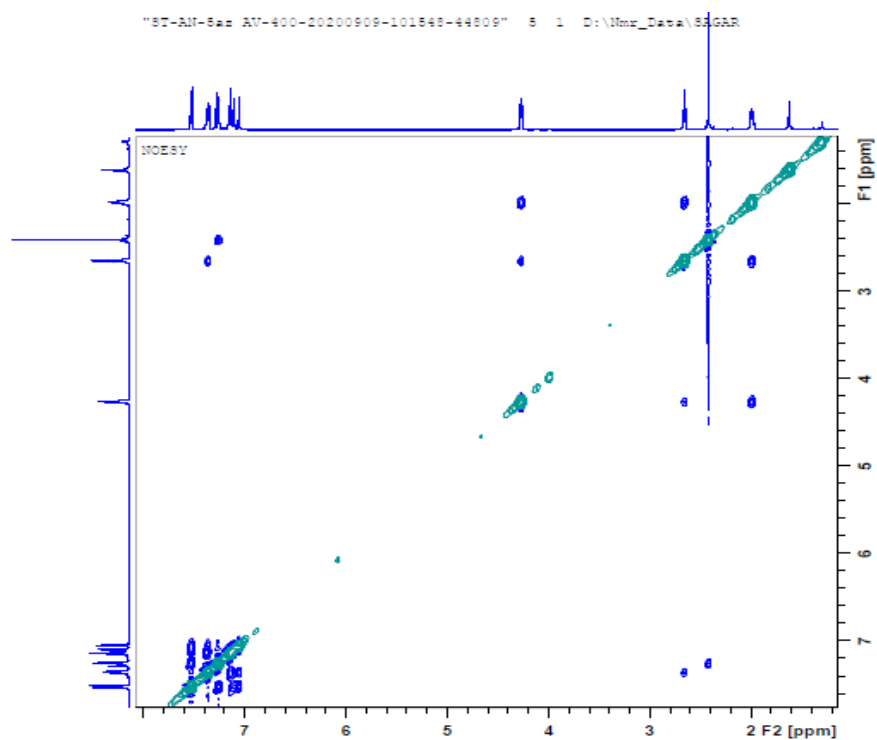

<sup>1</sup>H NMR-Spectrum (400 MHz, CDCl<sub>3</sub>) of **5aa'**: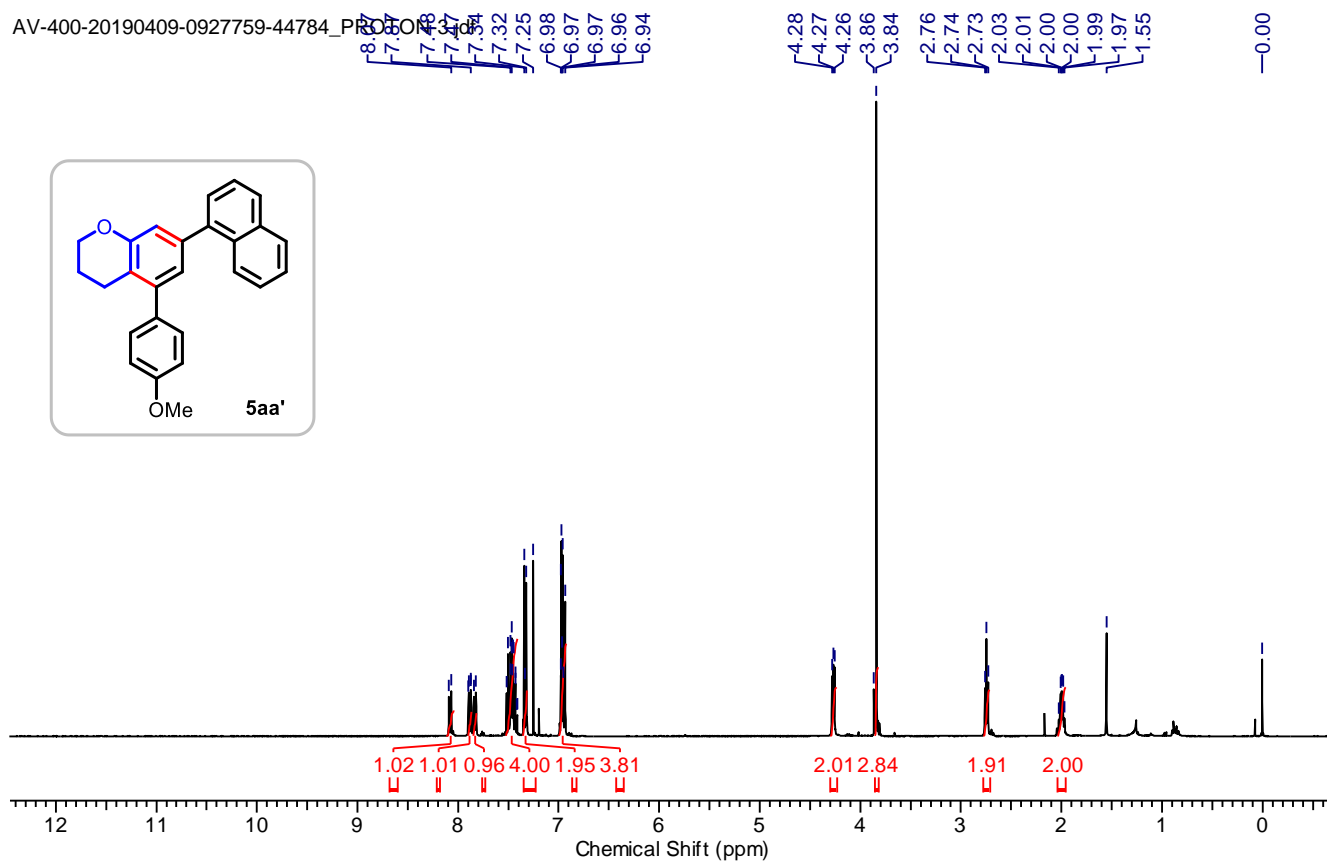<sup>13</sup>C NMR-Spectrum (101 MHz, CDCl<sub>3</sub>) of **5aa'**: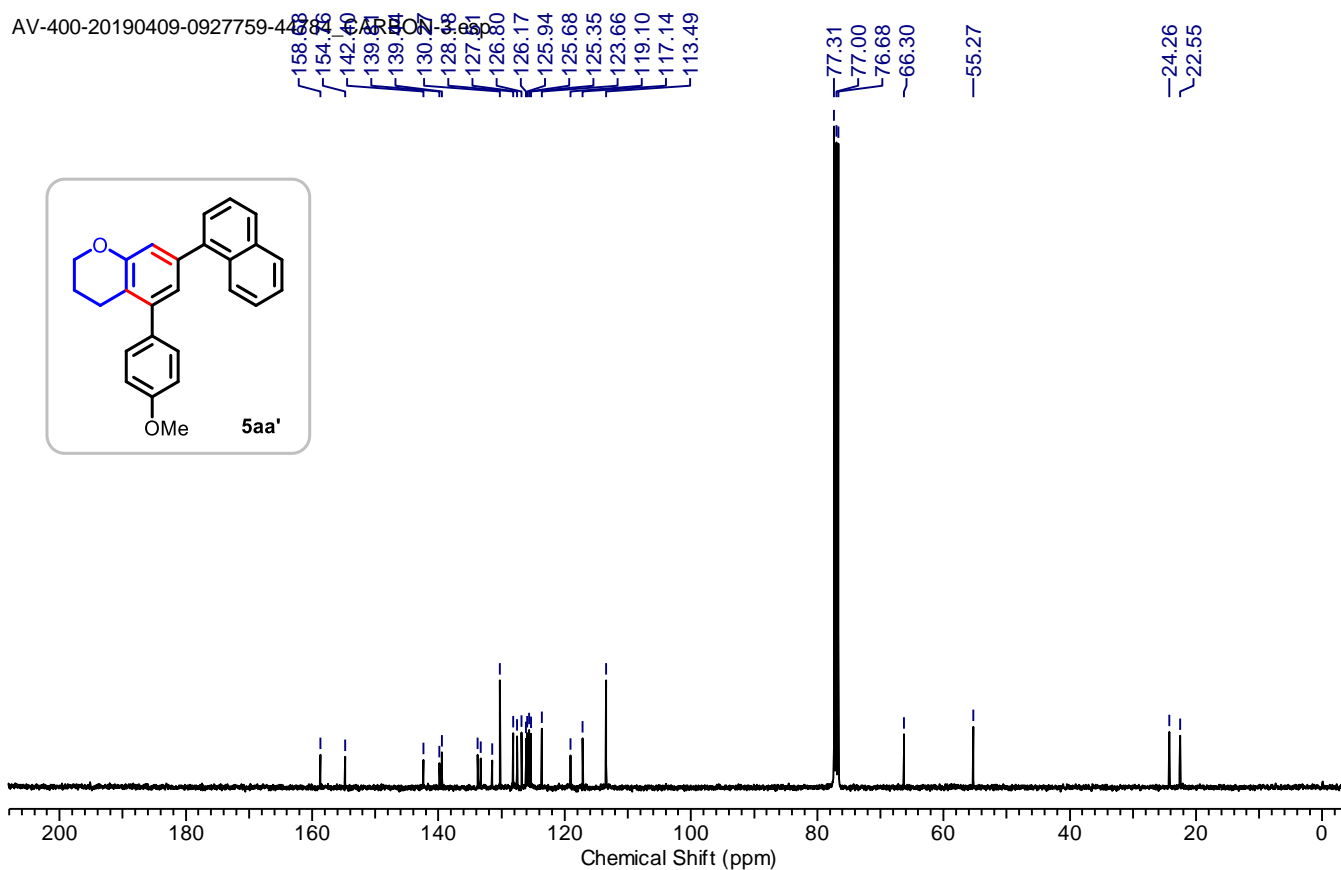

<sup>1</sup>H NMR-Spectrum (400 MHz, CDCl<sub>3</sub>) of **5bj**: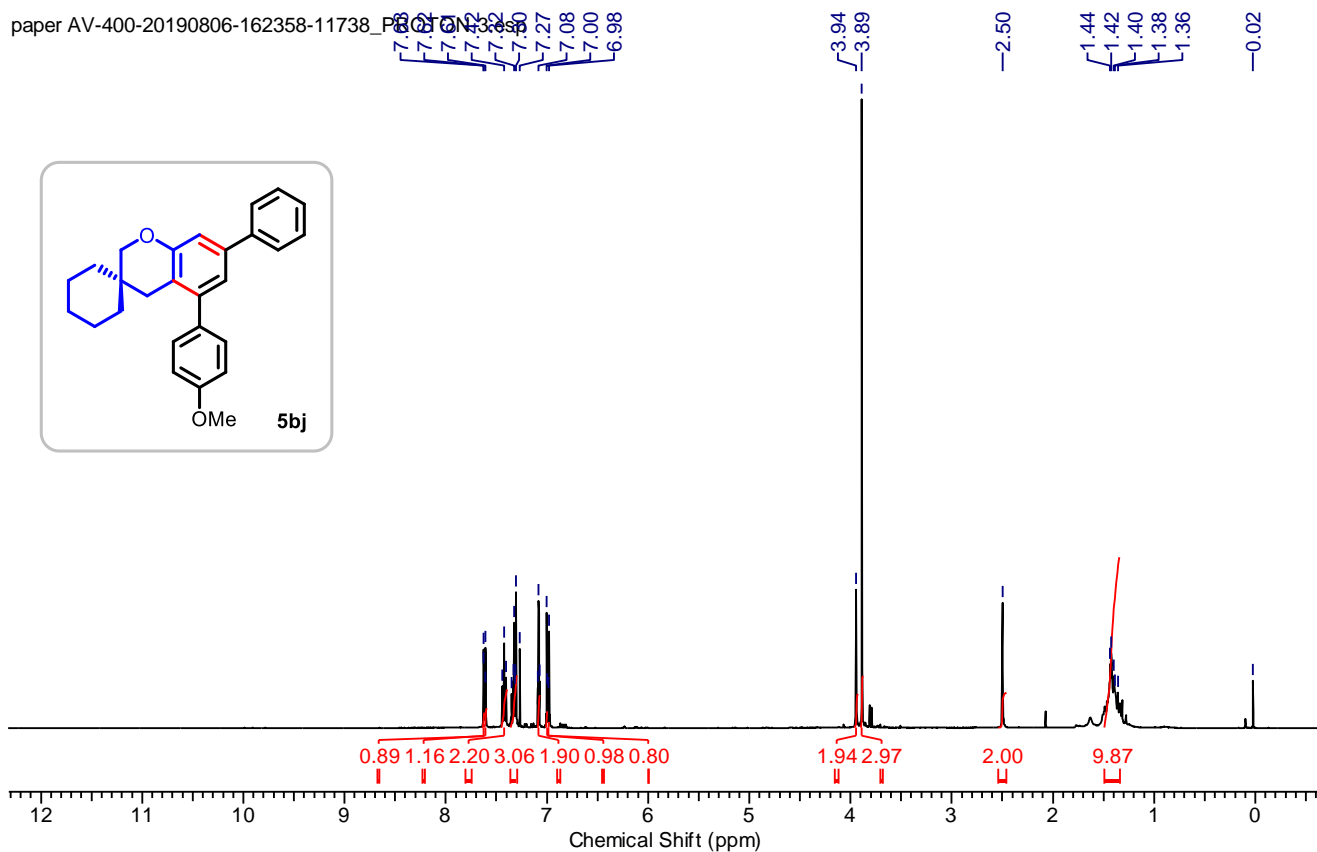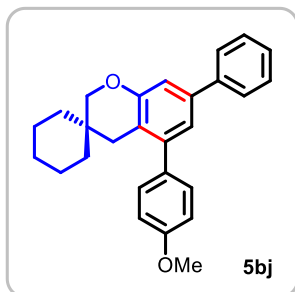<sup>13</sup>C NMR-Spectrum (101 MHz, CDCl<sub>3</sub>) of **5bj**: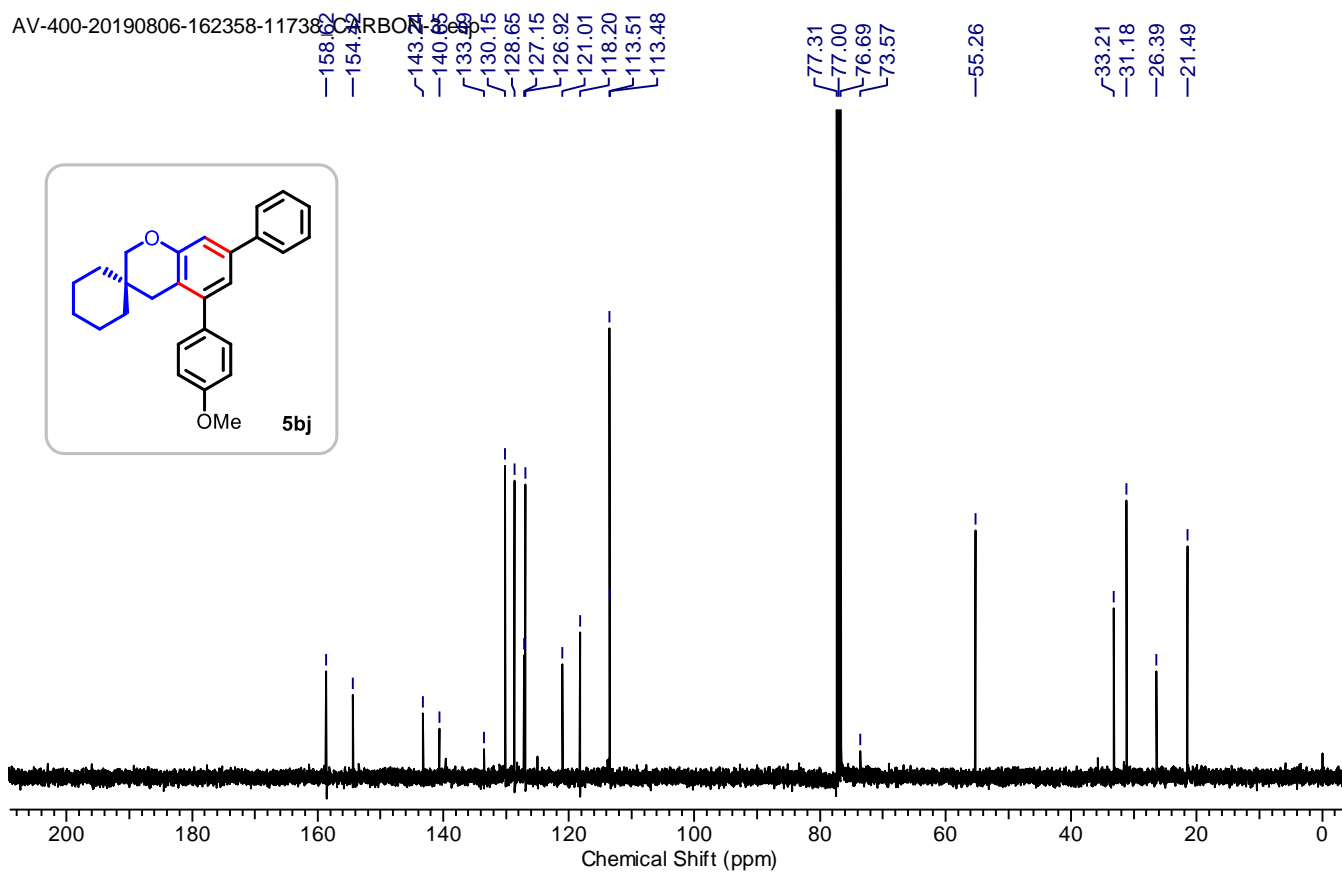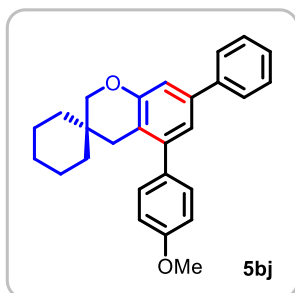



$^1\text{H}$  NMR-Spectrum (400 MHz,  $\text{CDCl}_3$ ) of **5bb'**: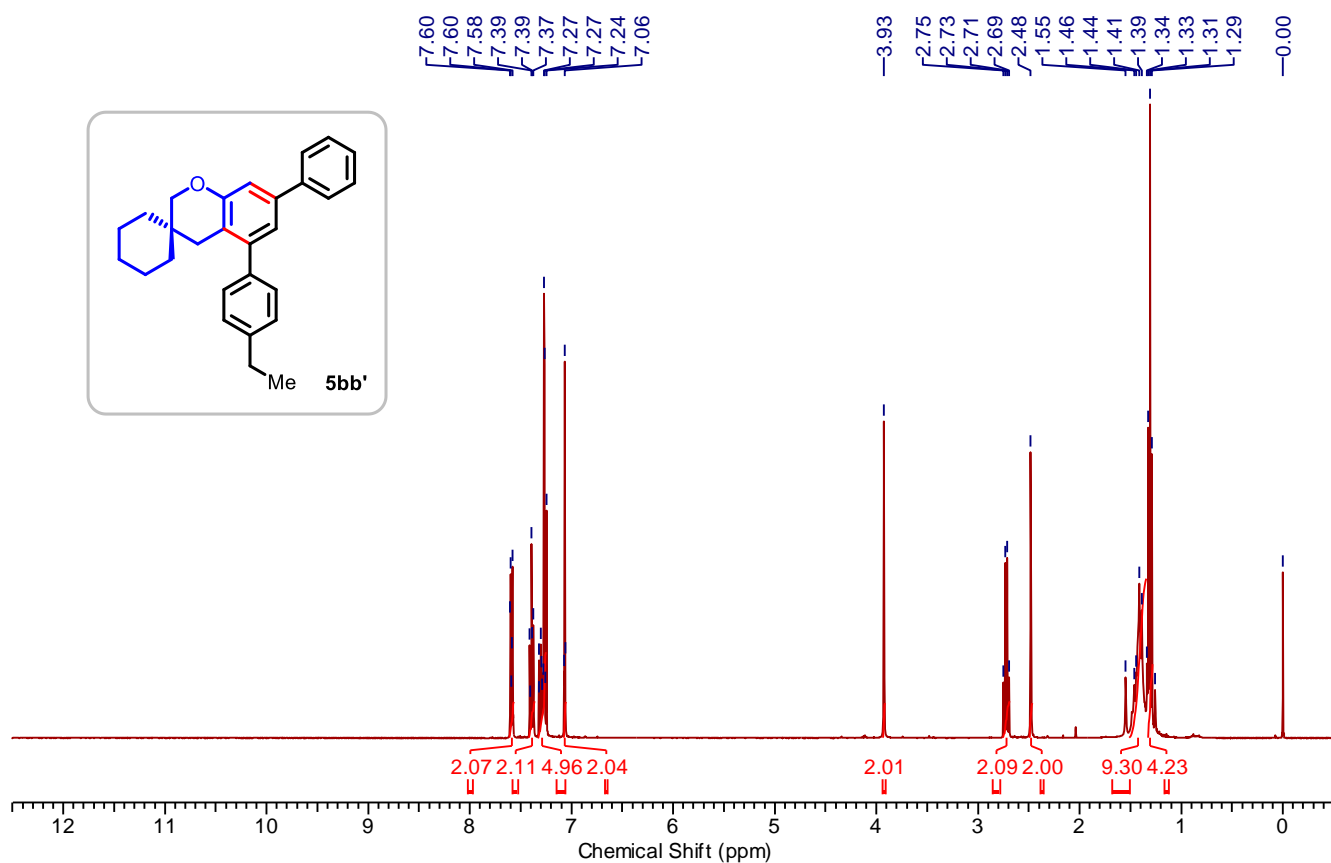 $^{13}\text{C}$  NMR-Spectrum (101 MHz,  $\text{CDCl}_3$ ) of **5bb'**: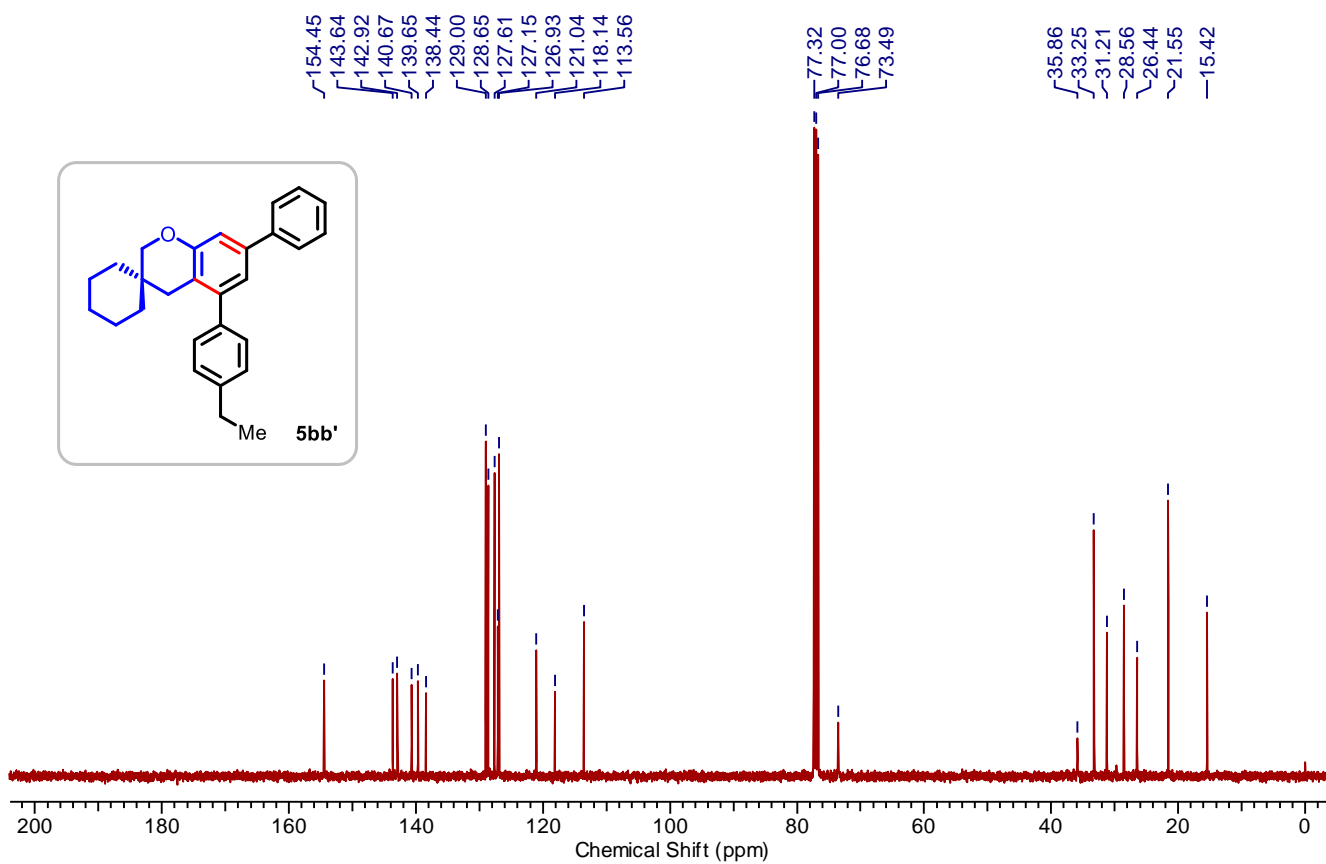

<sup>1</sup>H NMR-Spectrum (400 MHz, CDCl<sub>3</sub>) of **5ca'**:

paper AV-400-20190722-114252-11738

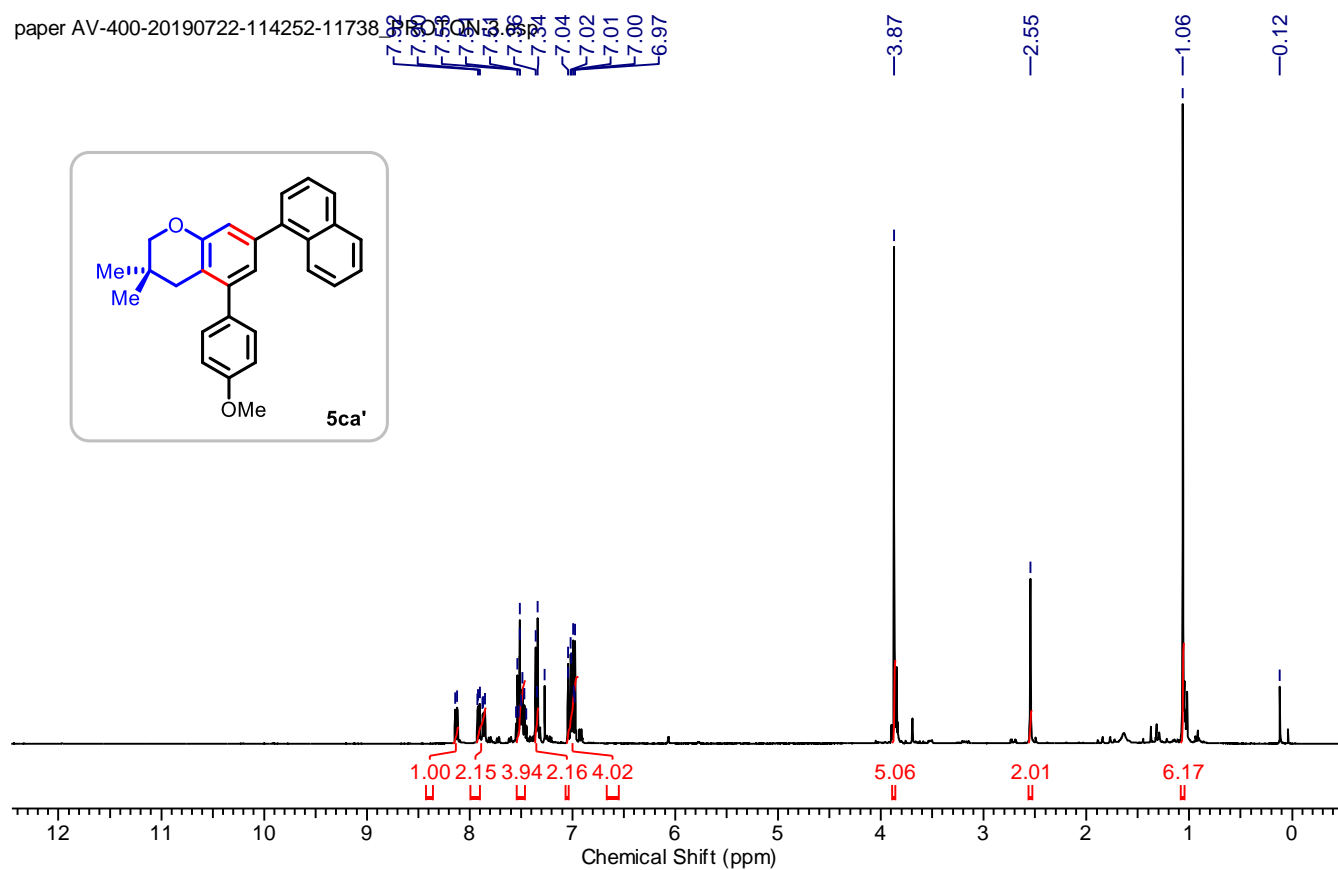<sup>13</sup>C NMR-Spectrum (126 MHz, CDCl<sub>3</sub>) of **5ca'**:

AV-500-20190715-120718-11738

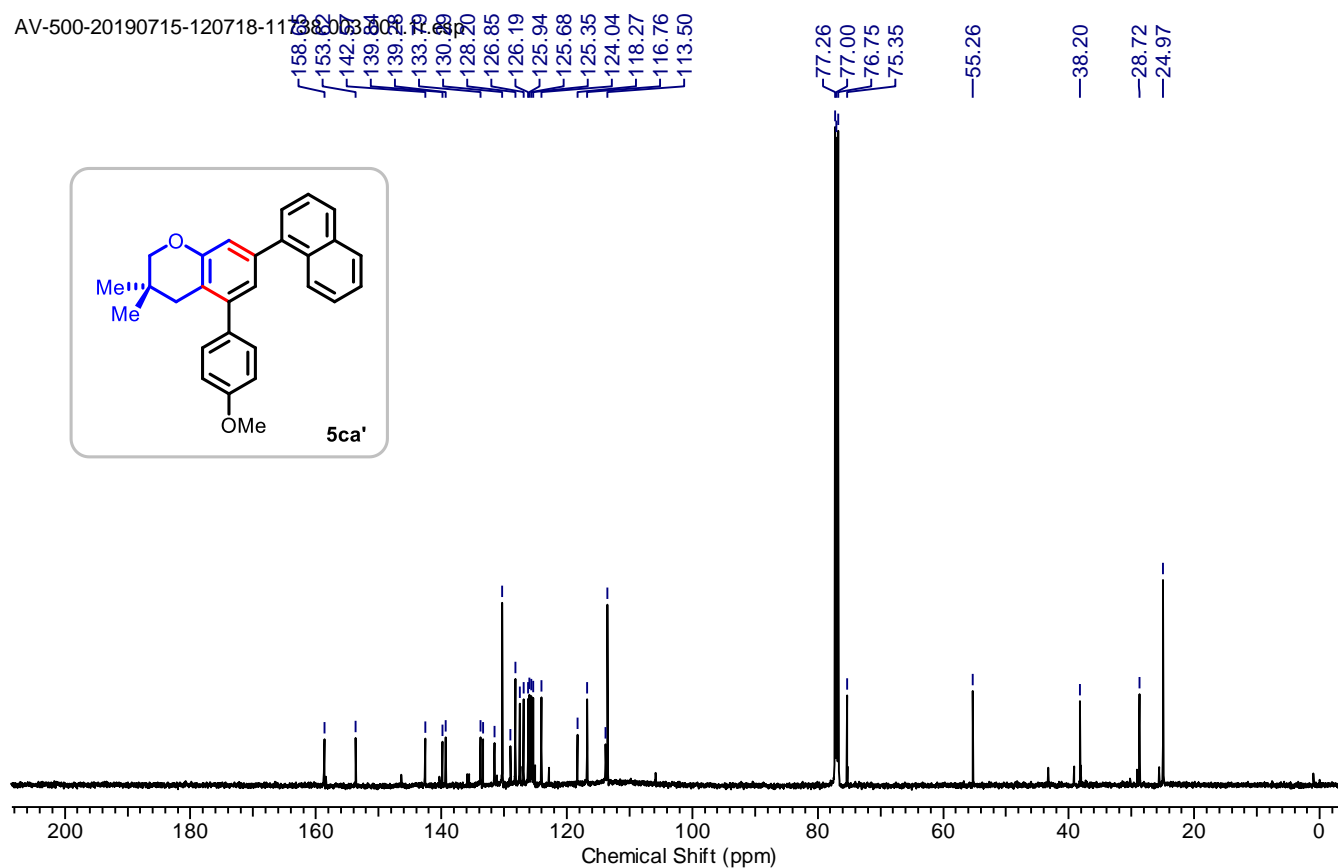

<sup>1</sup>H NMR-Spectrum (400 MHz, CDCl<sub>3</sub>) of **5ac'**: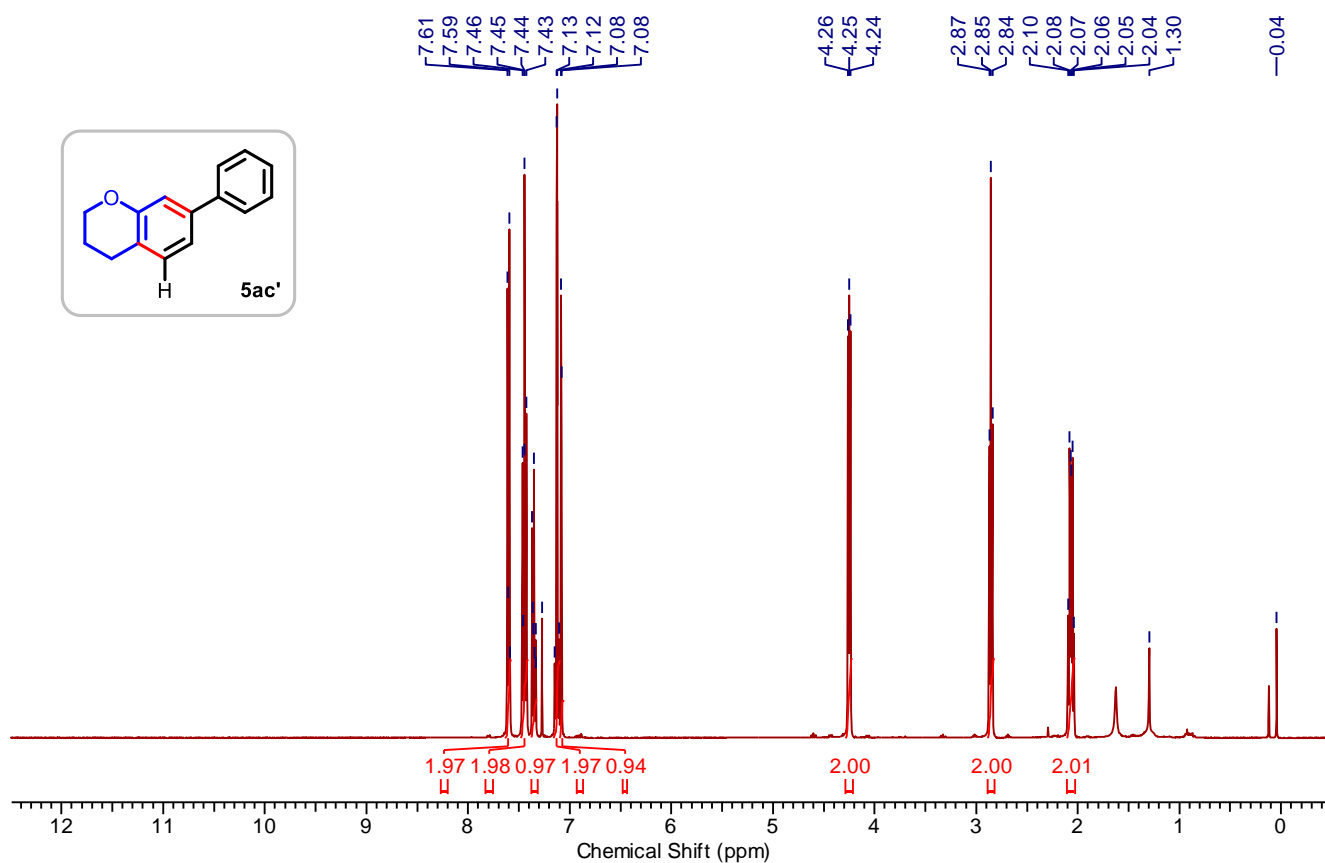<sup>13</sup>C NMR-Spectrum (101 MHz, CDCl<sub>3</sub>) of **5ac'**: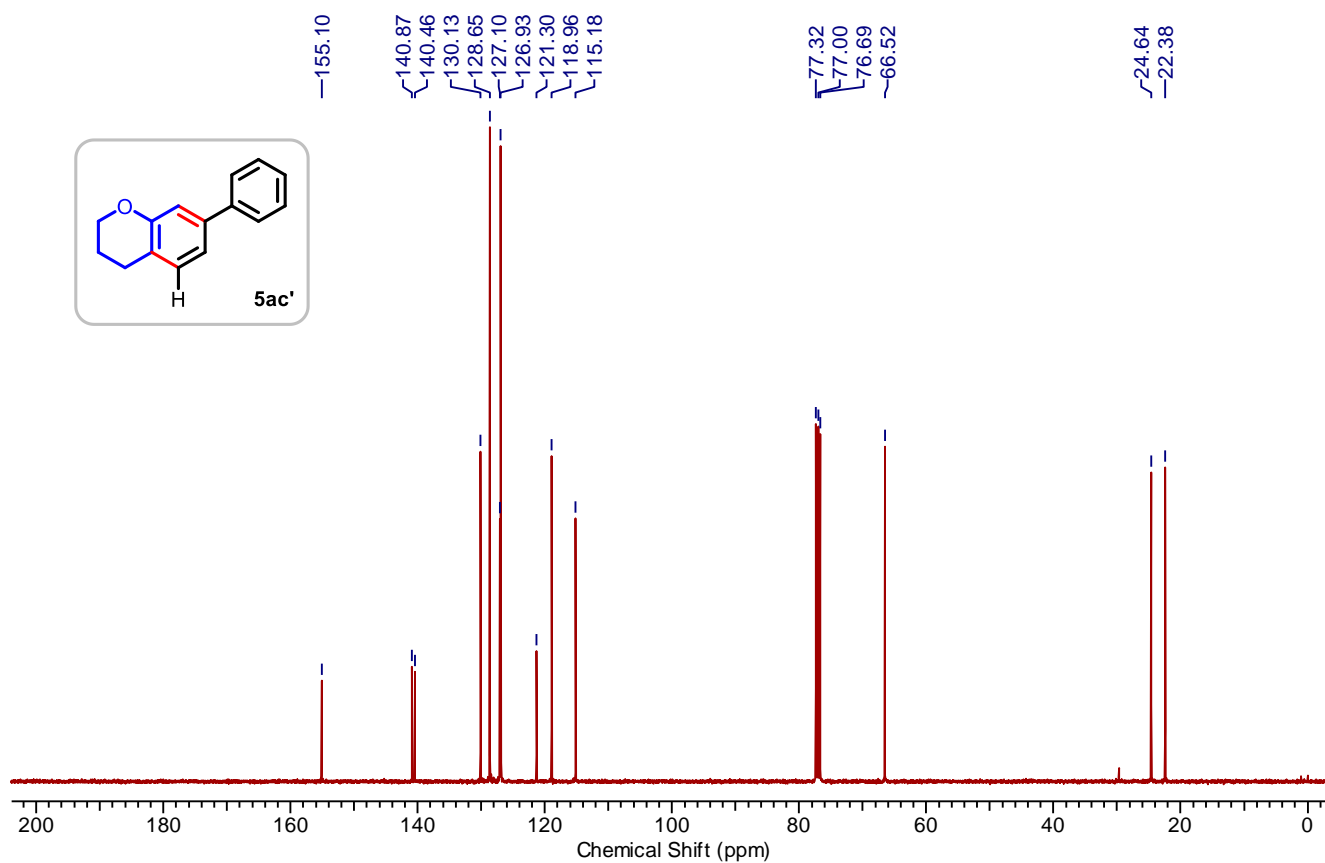

<sup>1</sup>H NMR-Spectrum (400 MHz, CDCl<sub>3</sub>) of **5ad'**: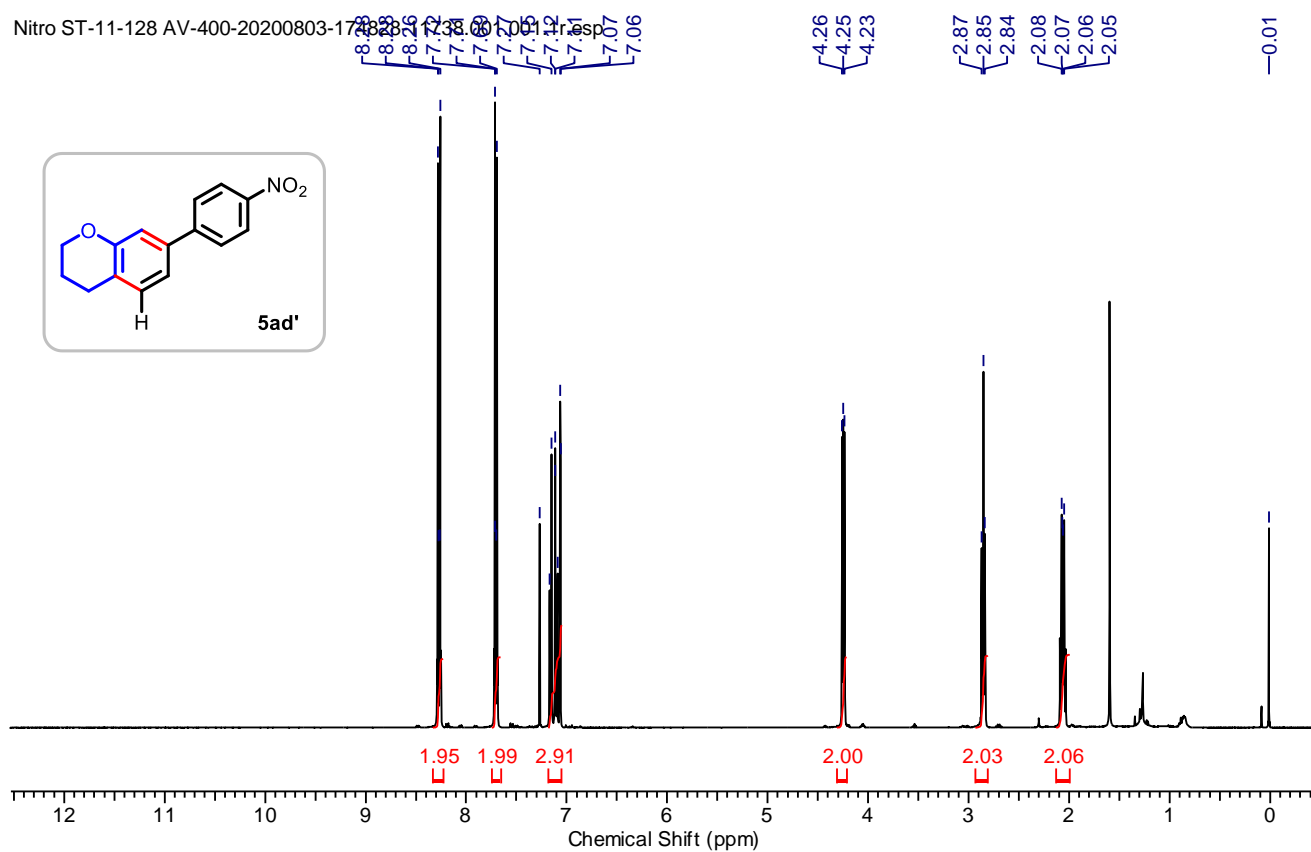<sup>13</sup>C NMR-Spectrum (101 MHz, CDCl<sub>3</sub>) of **5ad'**: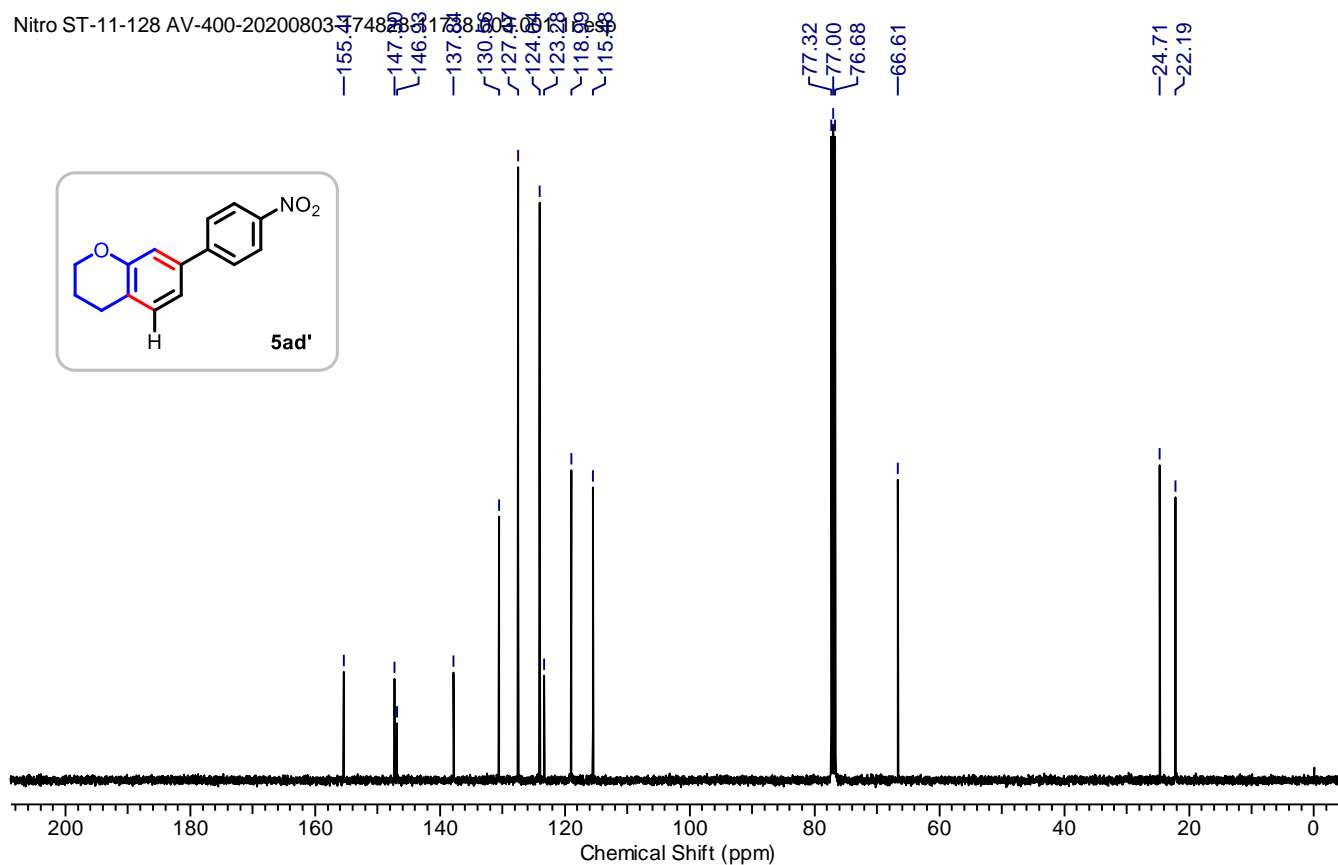

$^1\text{H}$  NMR-Spectrum (400 MHz,  $\text{CDCl}_3$ ) of **5ae'**: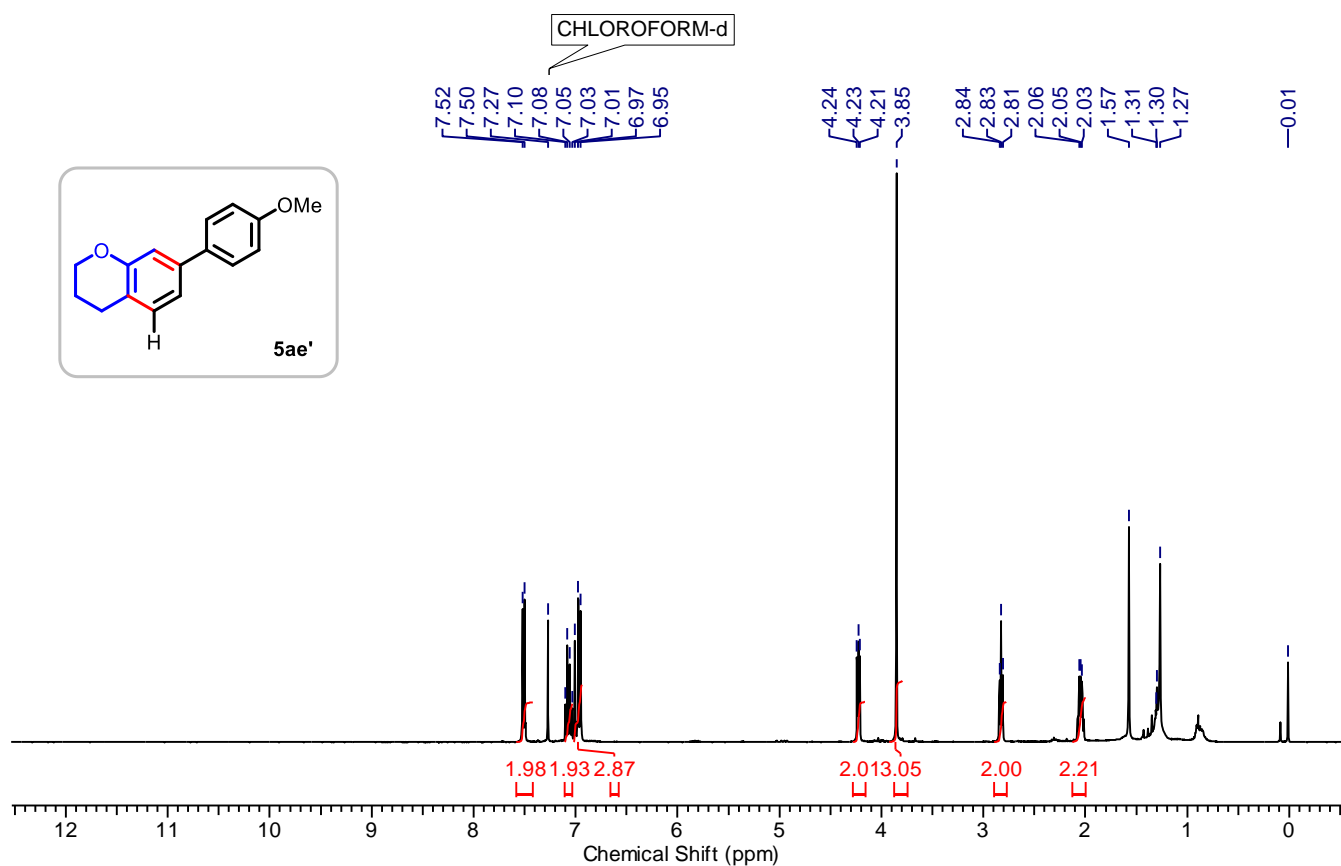 $^{13}\text{C}$  NMR-Spectrum (101 MHz,  $\text{CDCl}_3$ ) of **5ae'**: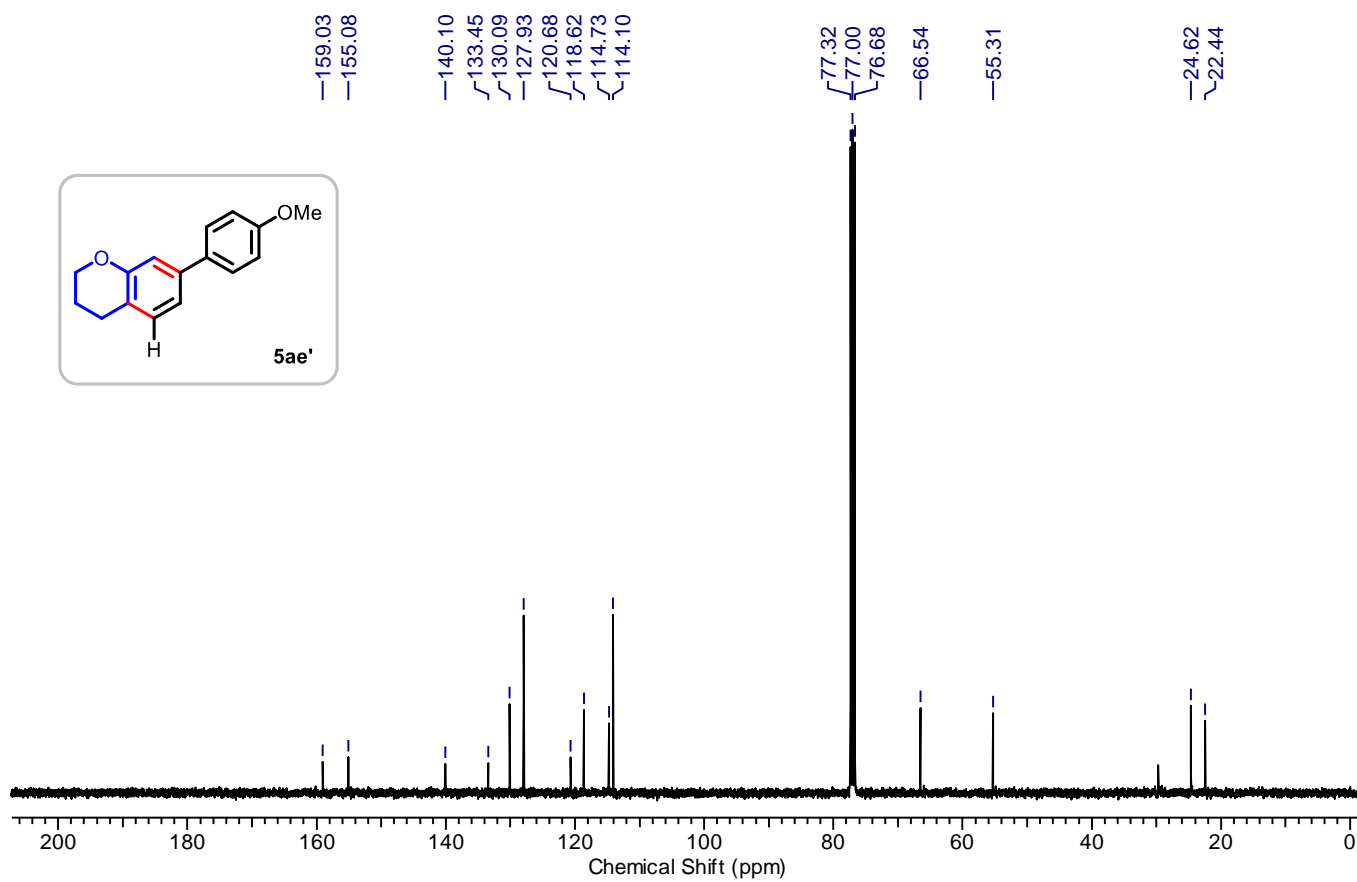

$^1\text{H}$  NMR-Spectrum (400 MHz,  $\text{CDCl}_3$ ) of **5dk**: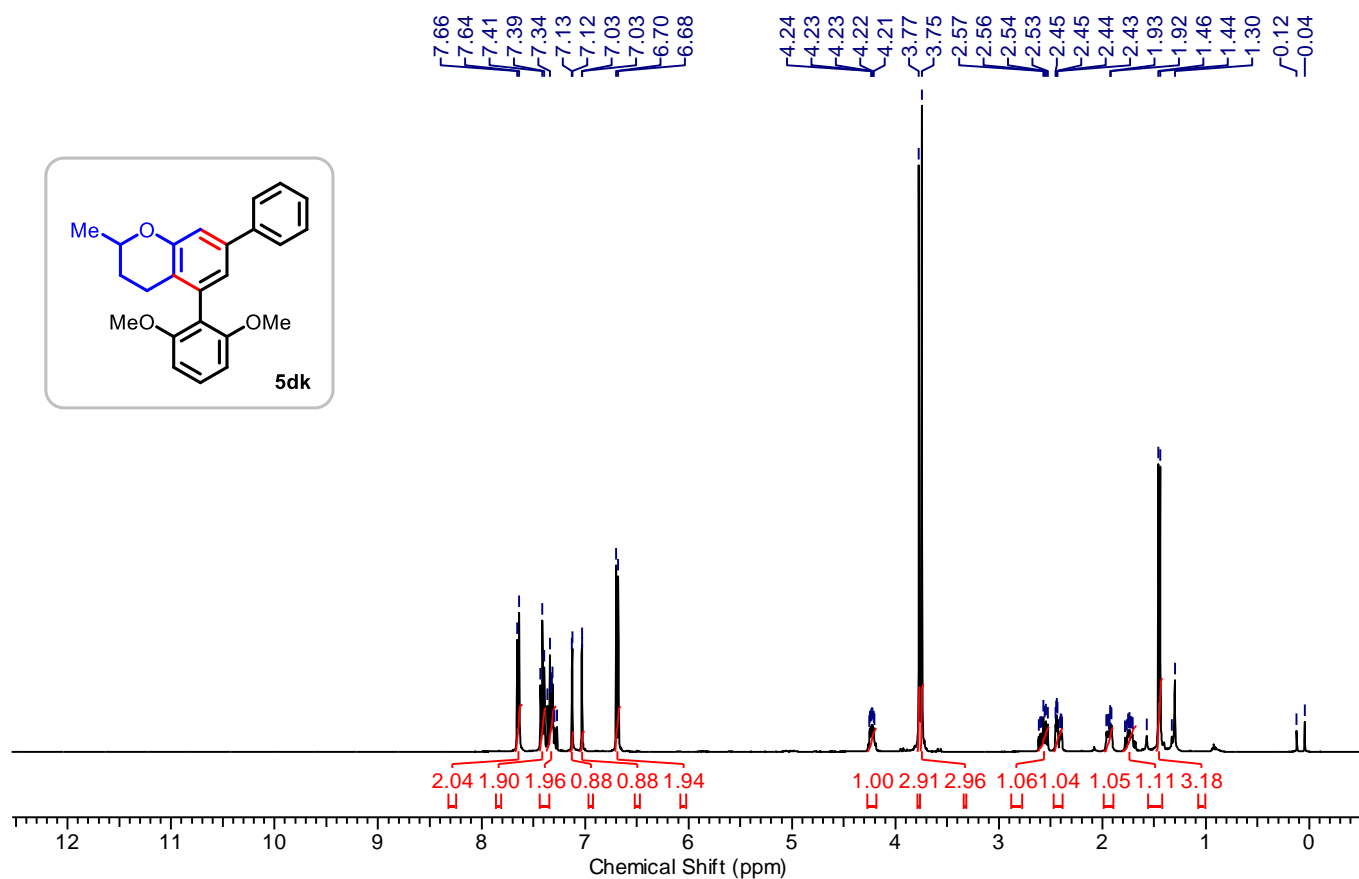 $^{13}\text{C}$  NMR-Spectrum (101 MHz,  $\text{CDCl}_3$ ) of **5dk**: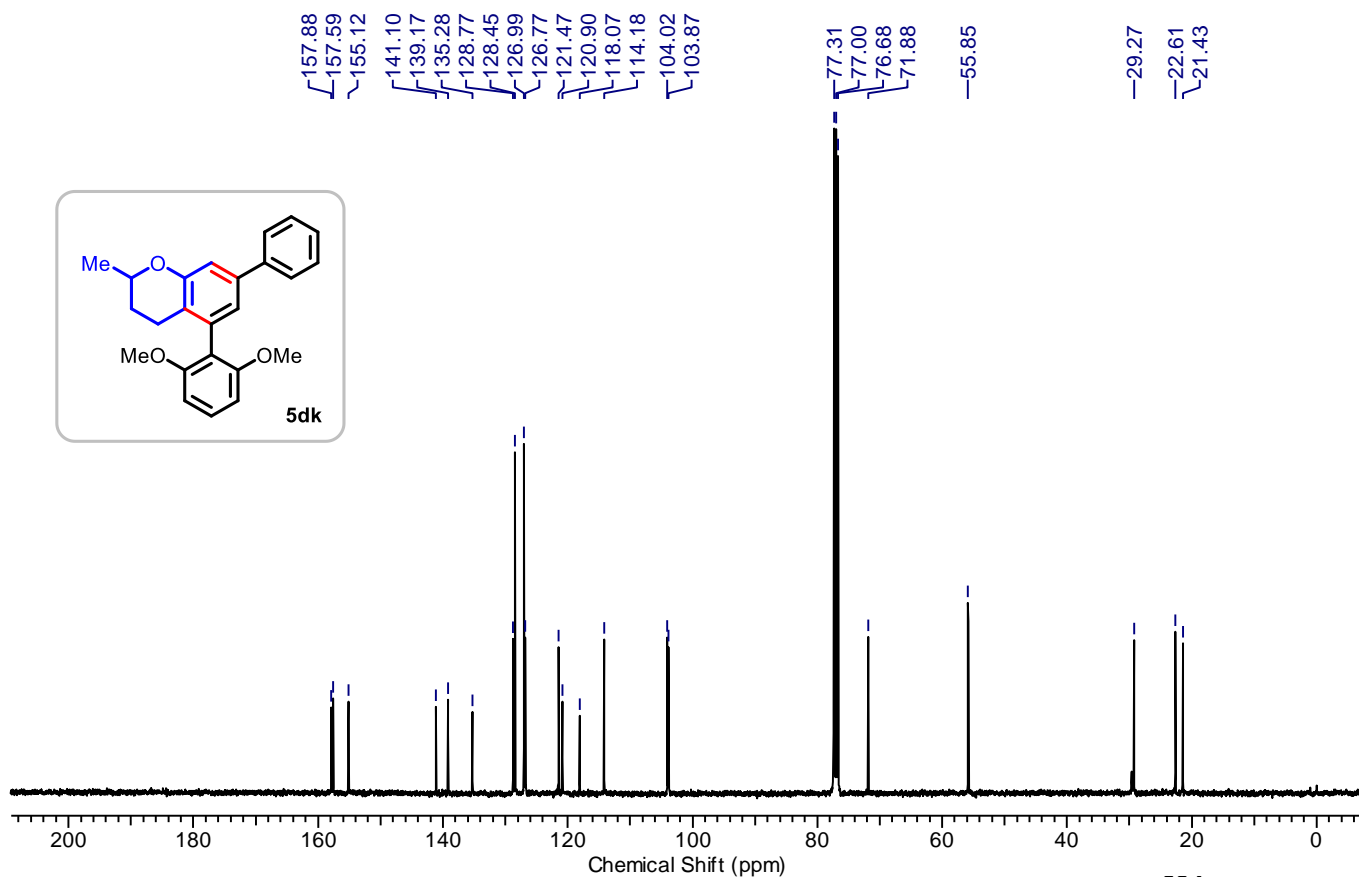

$^1\text{H}$  NMR-Spectrum (400 MHz,  $\text{CDCl}_3$ ) of **5df**: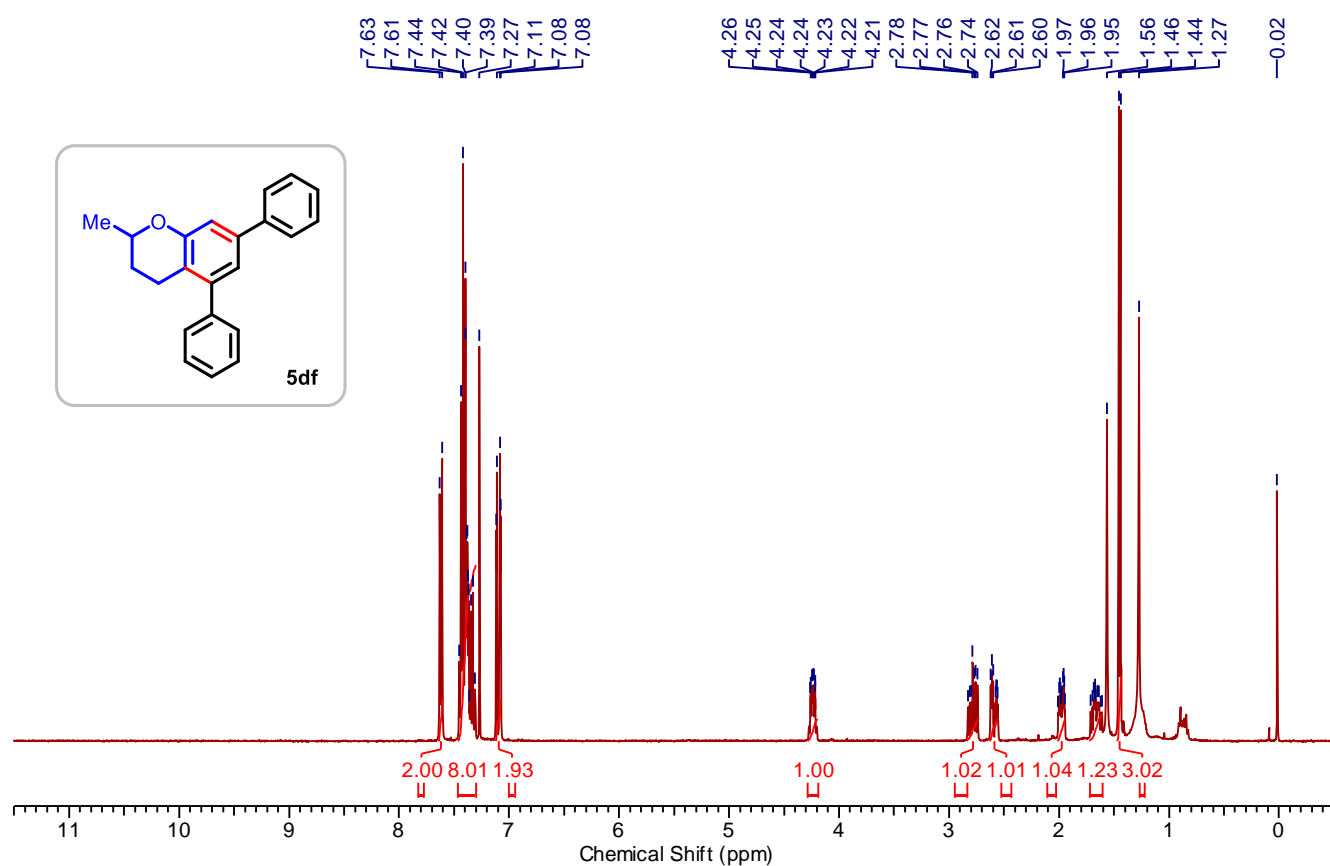 $^{13}\text{C}$  NMR-Spectrum (101 MHz,  $\text{CDCl}_3$ ) of **5df**: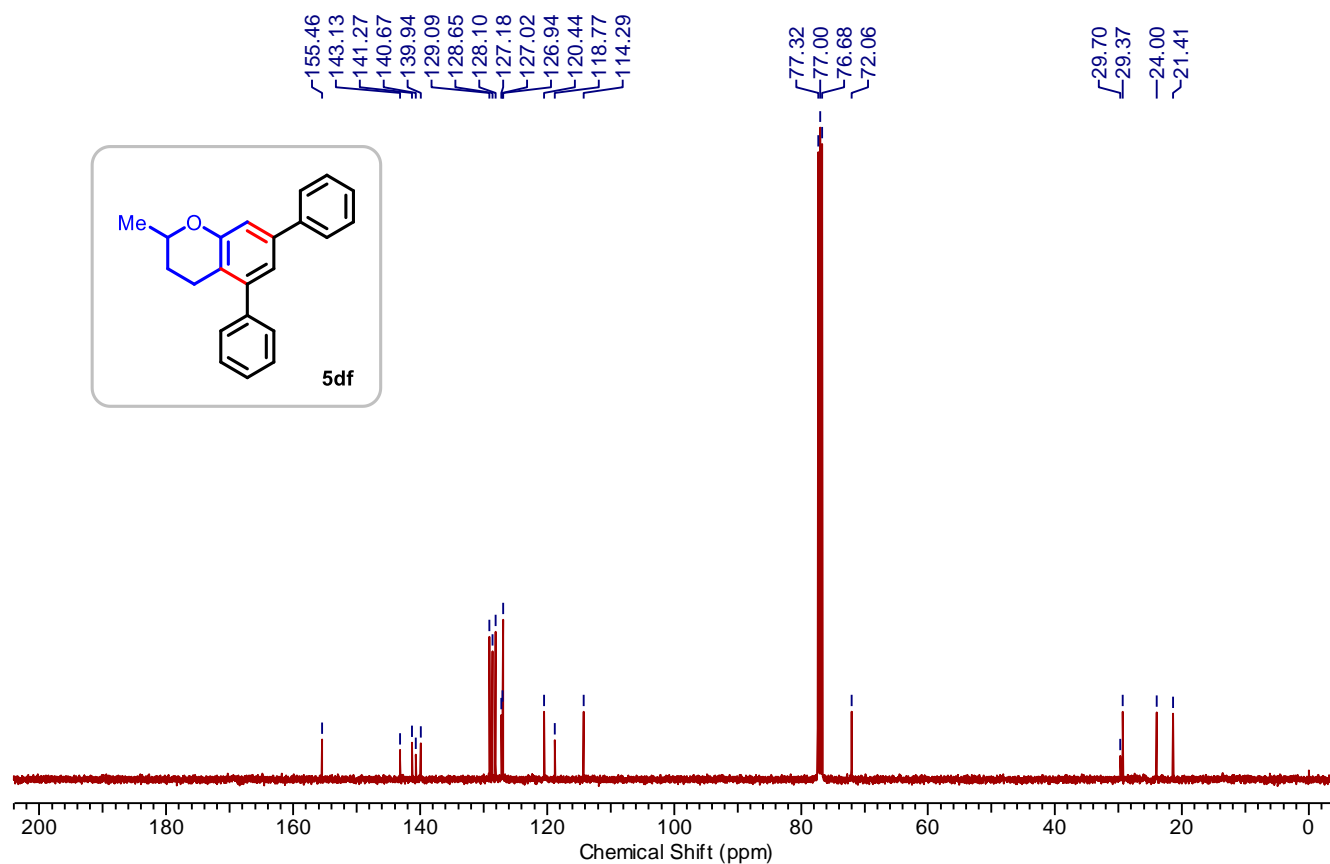

<sup>1</sup>H NMR-Spectrum (400 MHz, CDCl<sub>3</sub>) of **5dq**:

AV-400-1.ESP

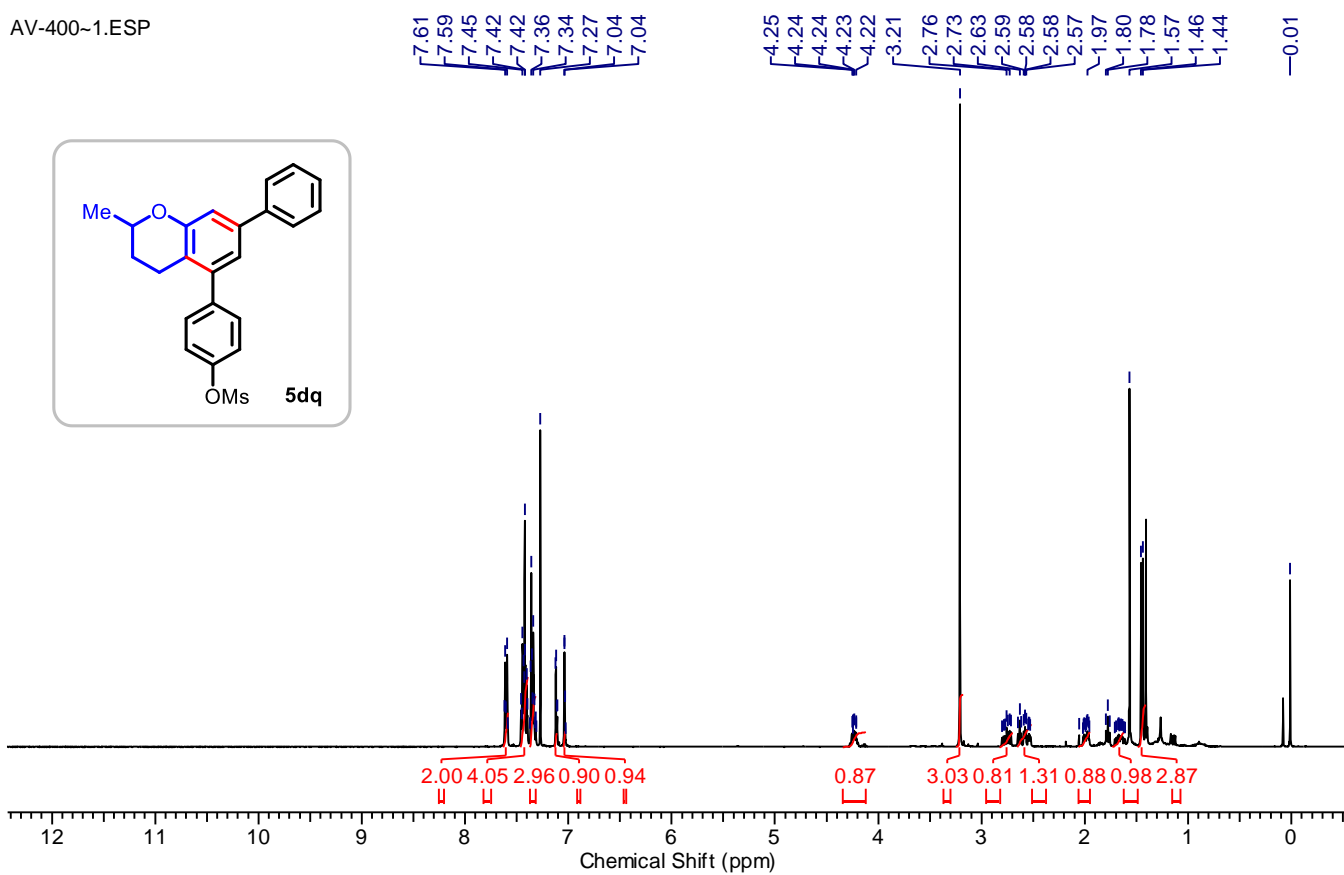<sup>13</sup>C NMR-Spectrum (101 MHz, CDCl<sub>3</sub>) of **5dq**:

AV-400-3.ESP

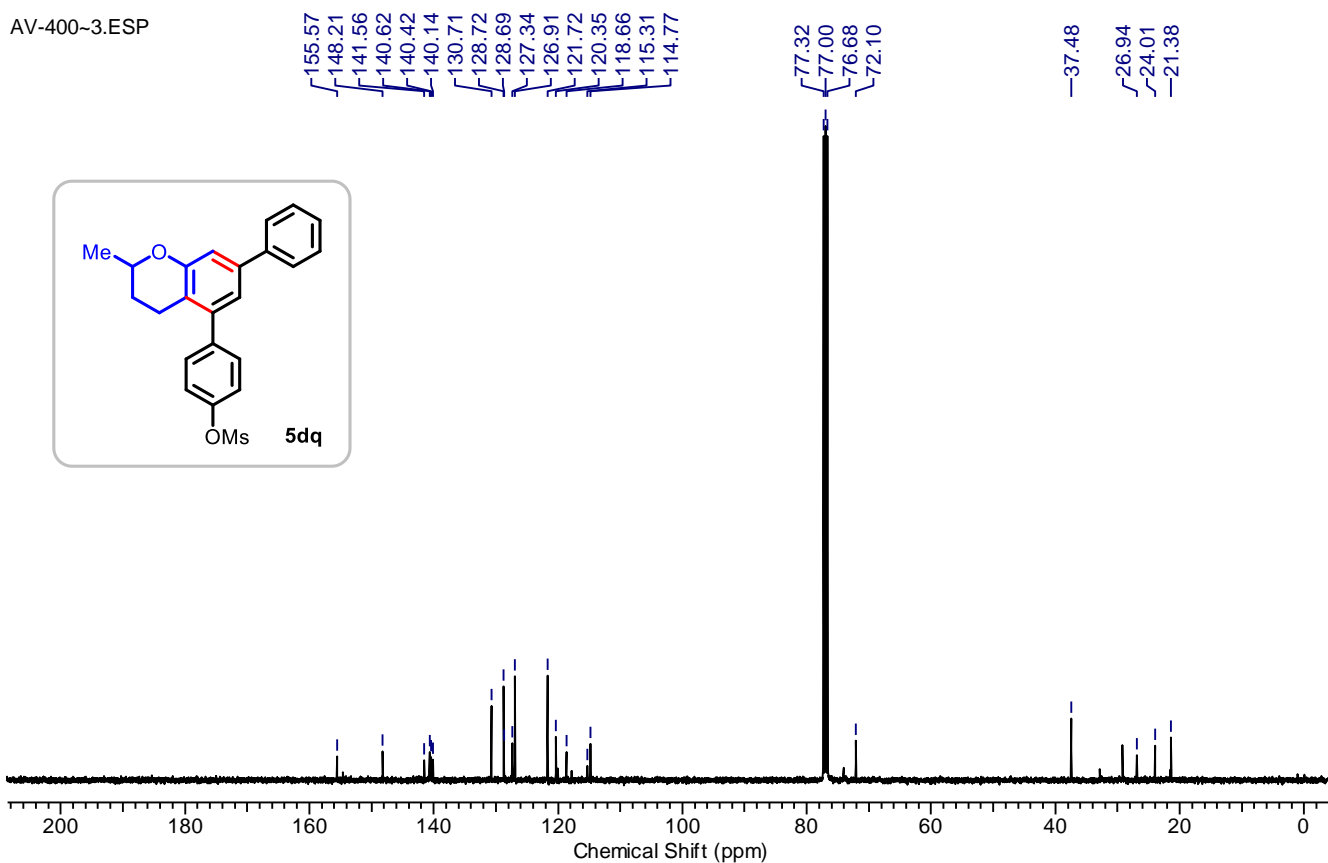



<sup>1</sup>H NMR-Spectrum (400 MHz, CDCl<sub>3</sub>) of **5ek**: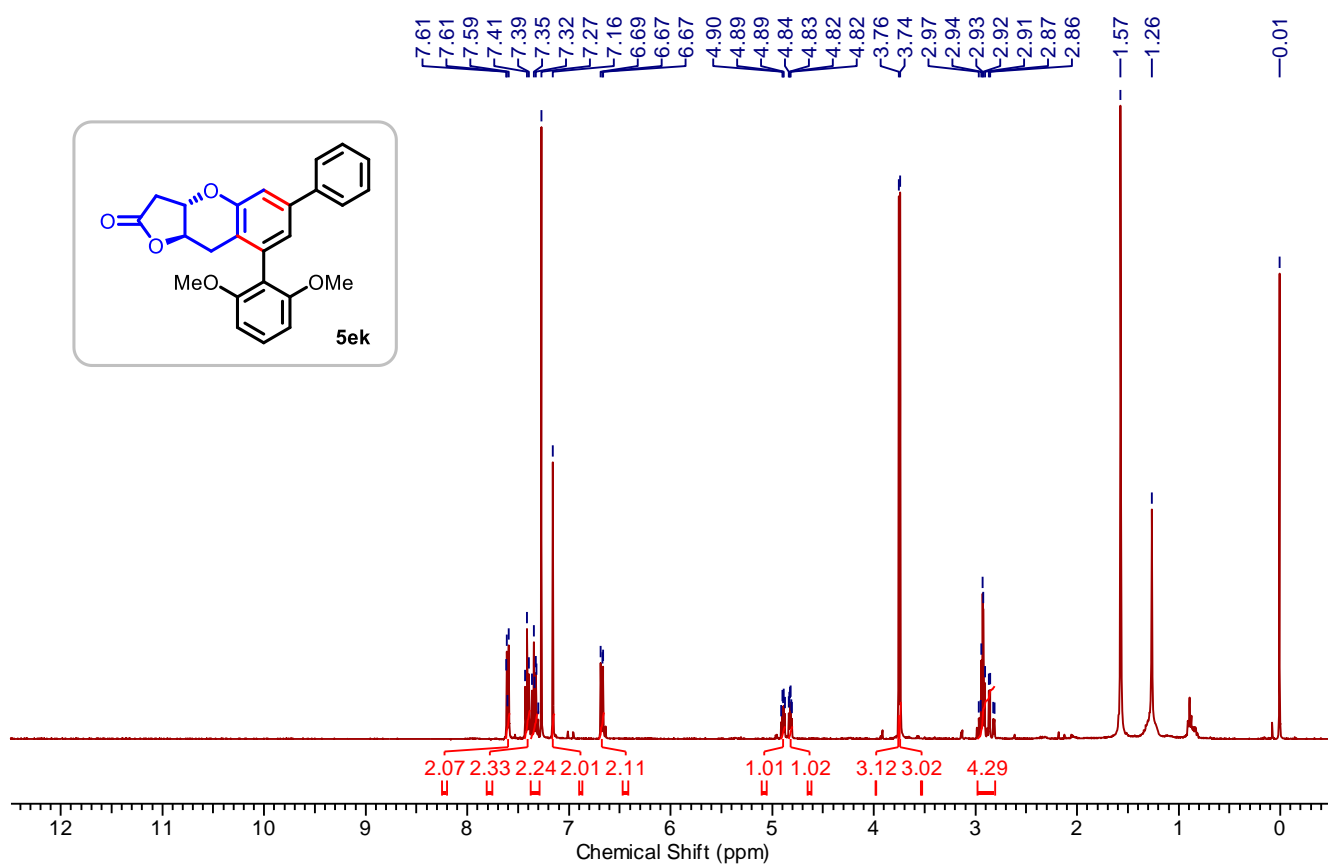<sup>13</sup>C NMR-Spectrum (101 MHz, CDCl<sub>3</sub>) of **5ek**: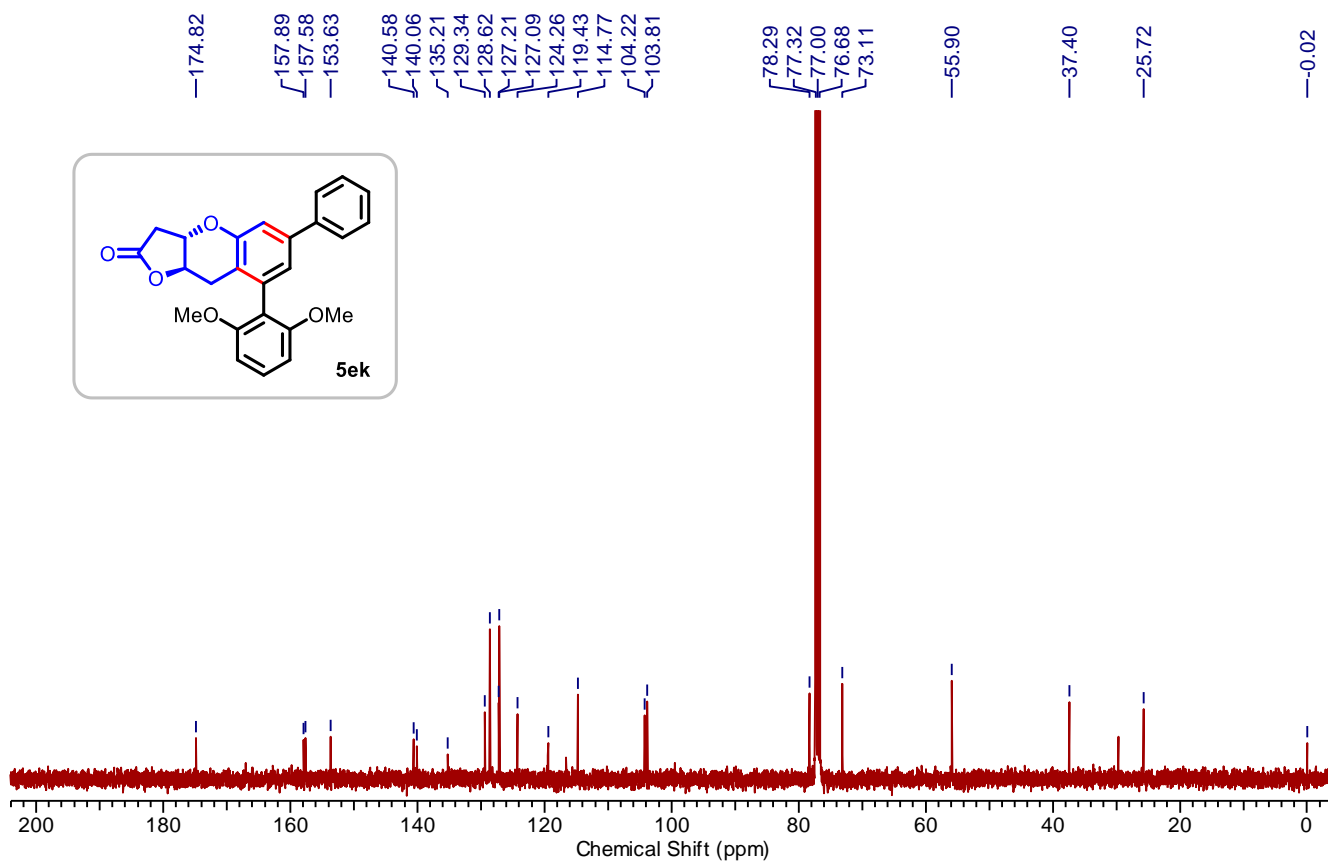

$^1\text{H}$  NMR-Spectrum (400 MHz,  $\text{CDCl}_3$ ) of **5ff**:

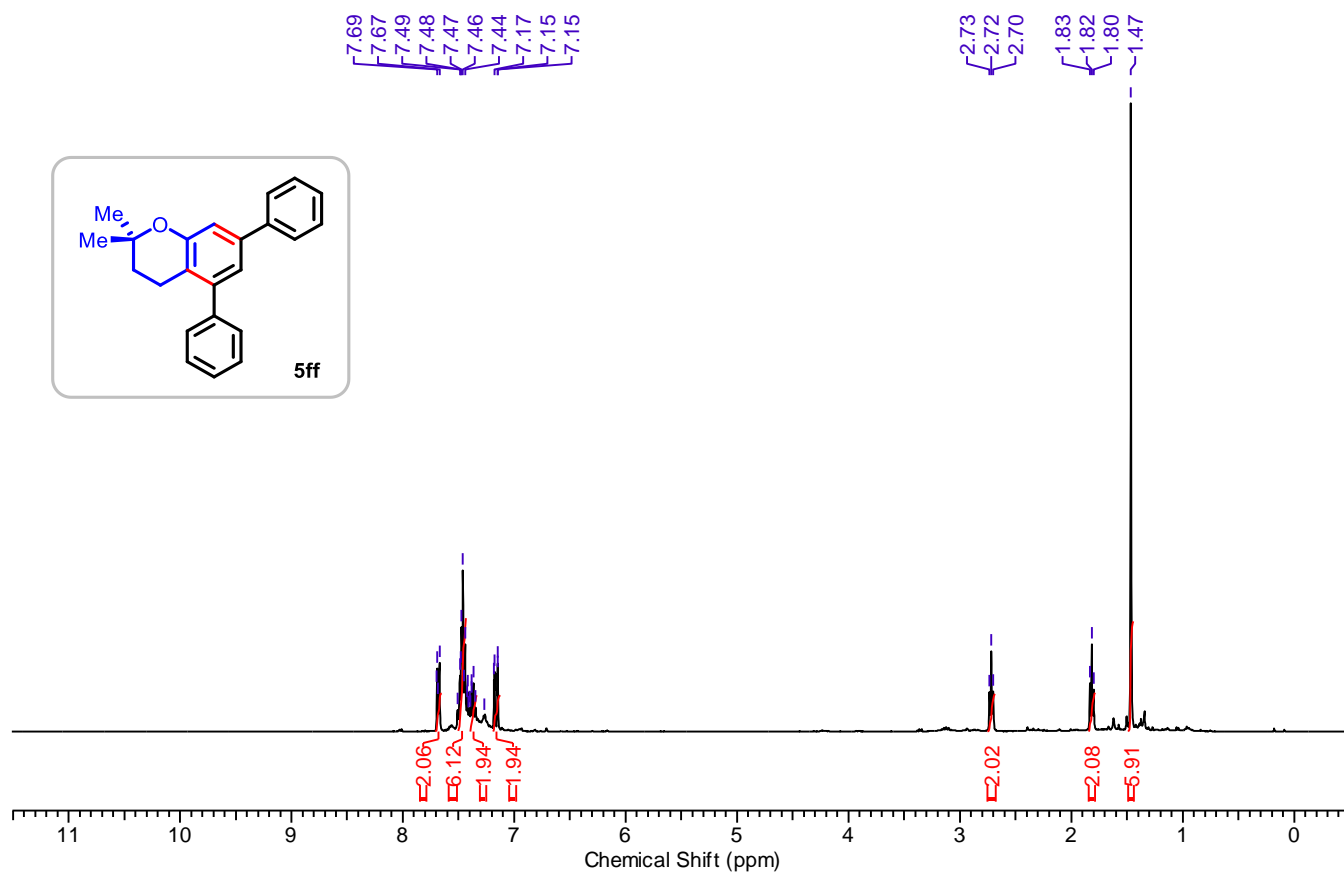

$^{13}\text{C}$  NMR-Spectrum (101 MHz,  $\text{CDCl}_3$ ) of **5ff**:

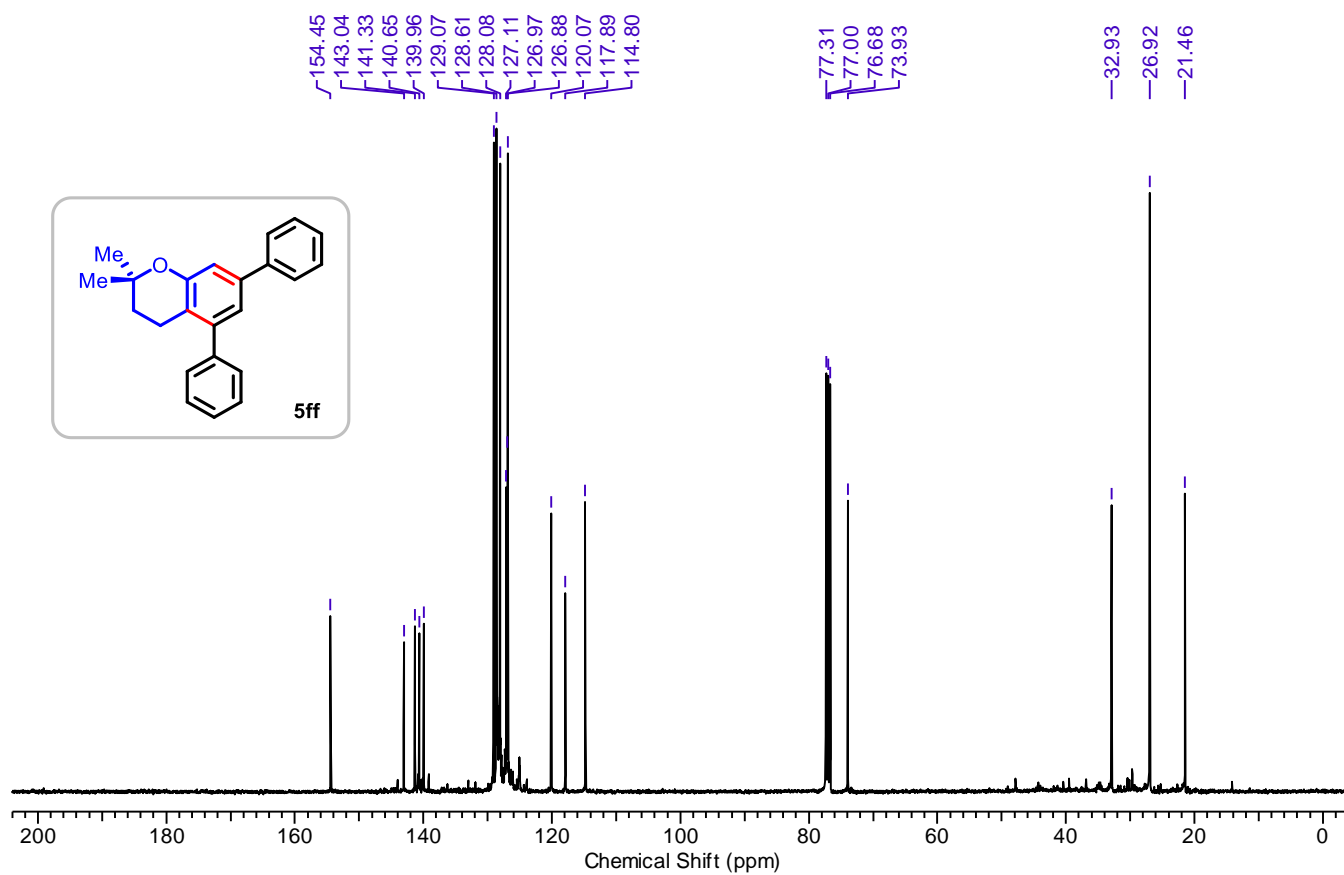

<sup>1</sup>H NMR-Spectrum (400 MHz, CDCl<sub>3</sub>) of **5fk**: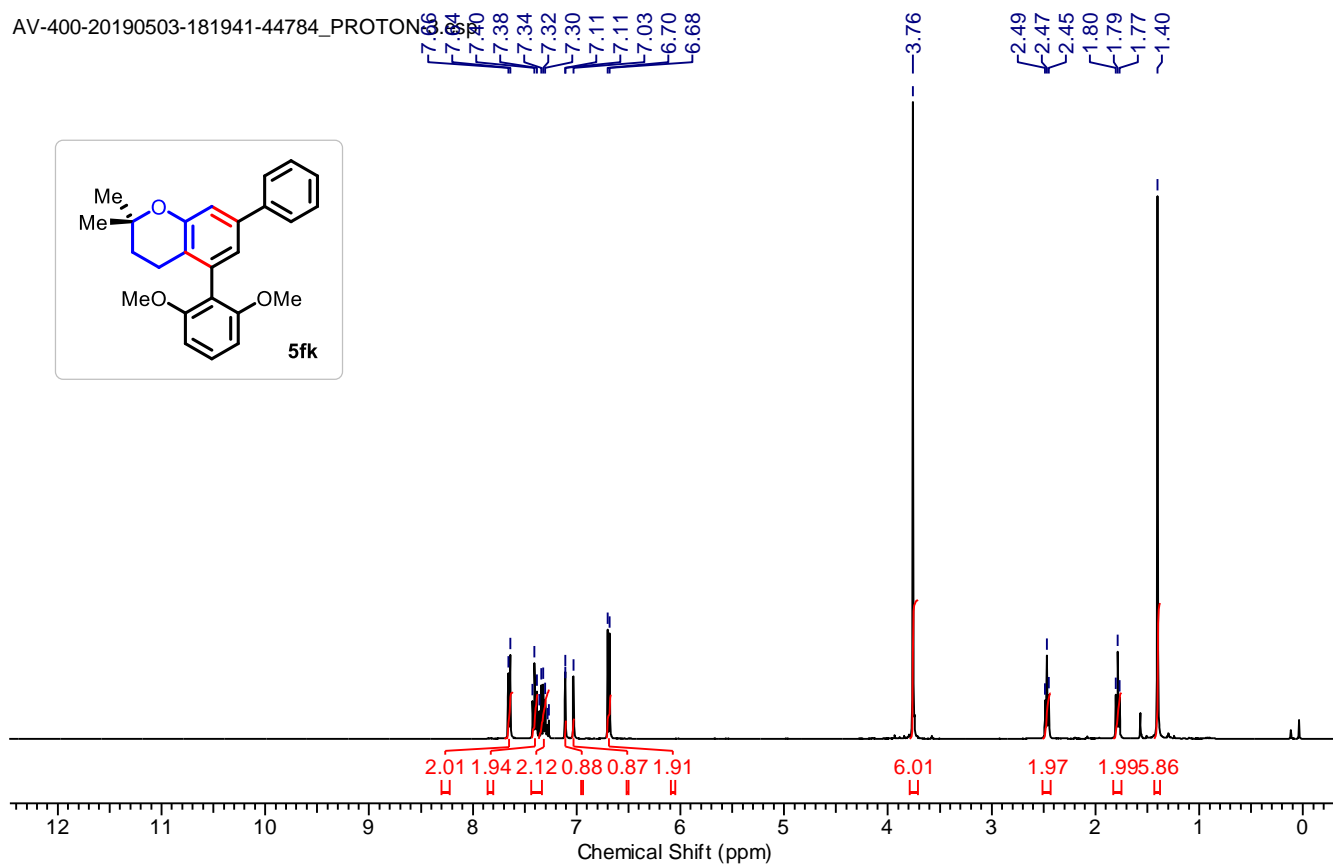<sup>13</sup>C NMR-Spectrum (101 MHz, CDCl<sub>3</sub>) of **5fk**: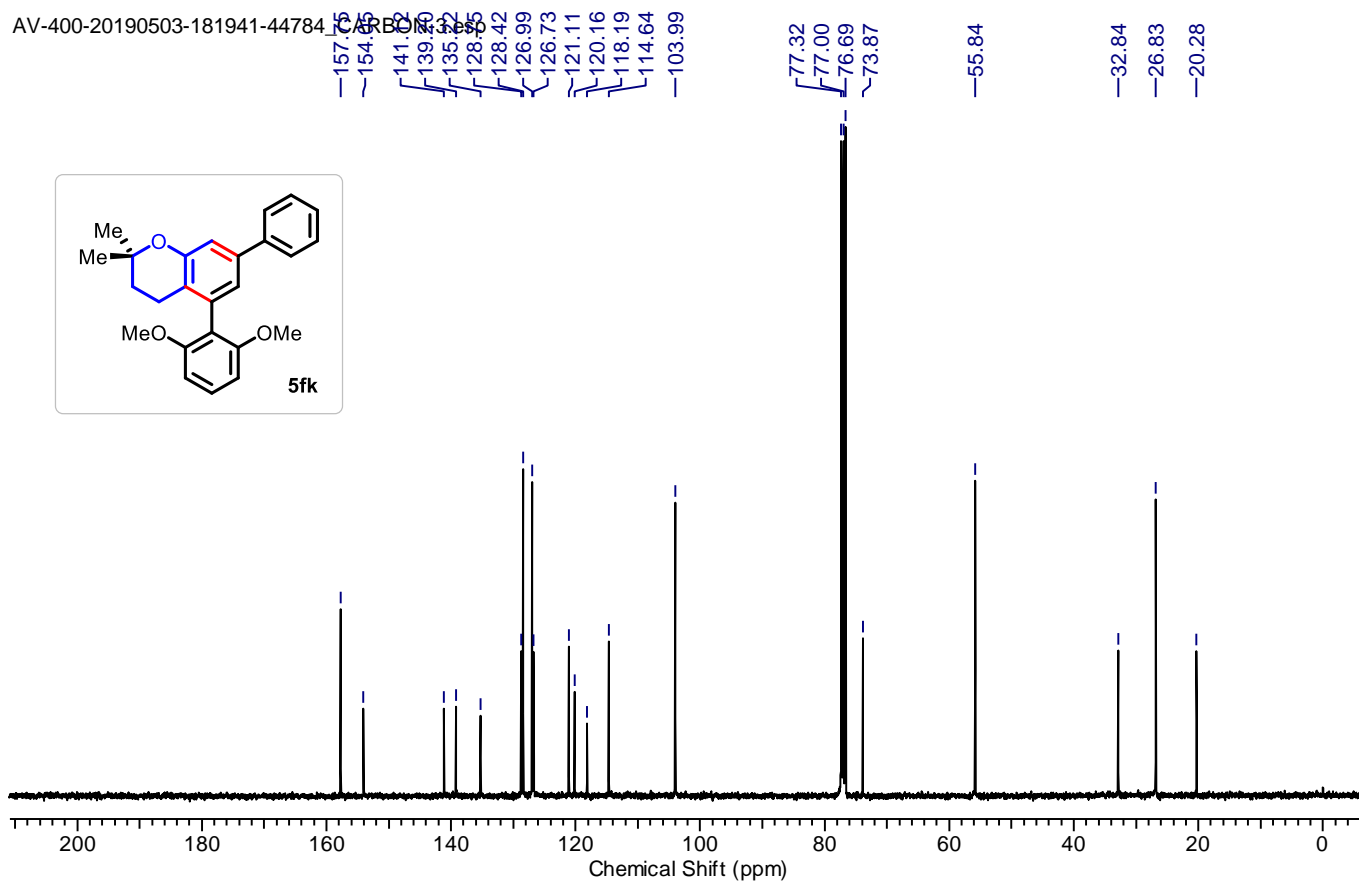

<sup>1</sup>H NMR-Spectrum (400 MHz, CDCl<sub>3</sub>) of **5fu**: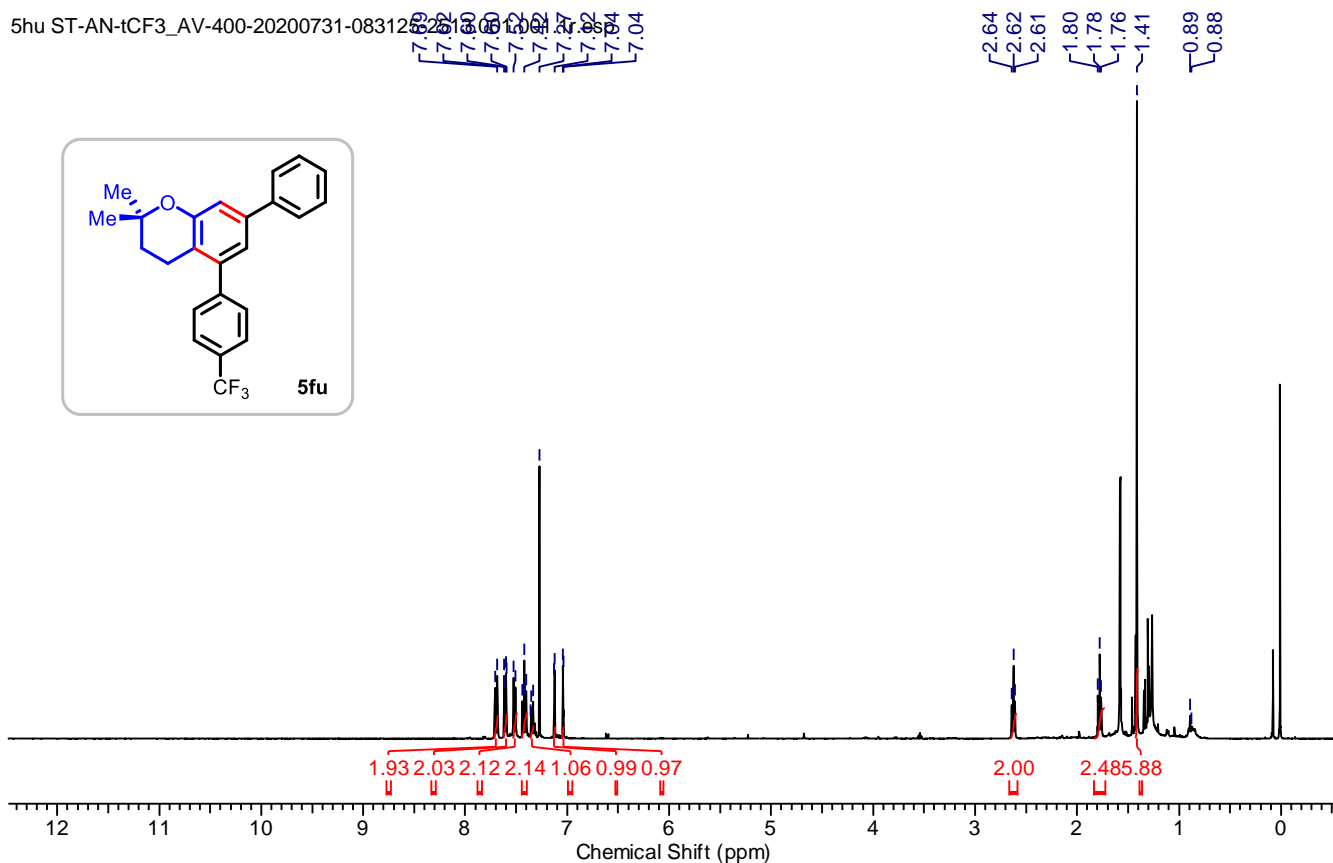<sup>13</sup>C NMR-Spectrum (101 MHz, CDCl<sub>3</sub>) of **5fu**: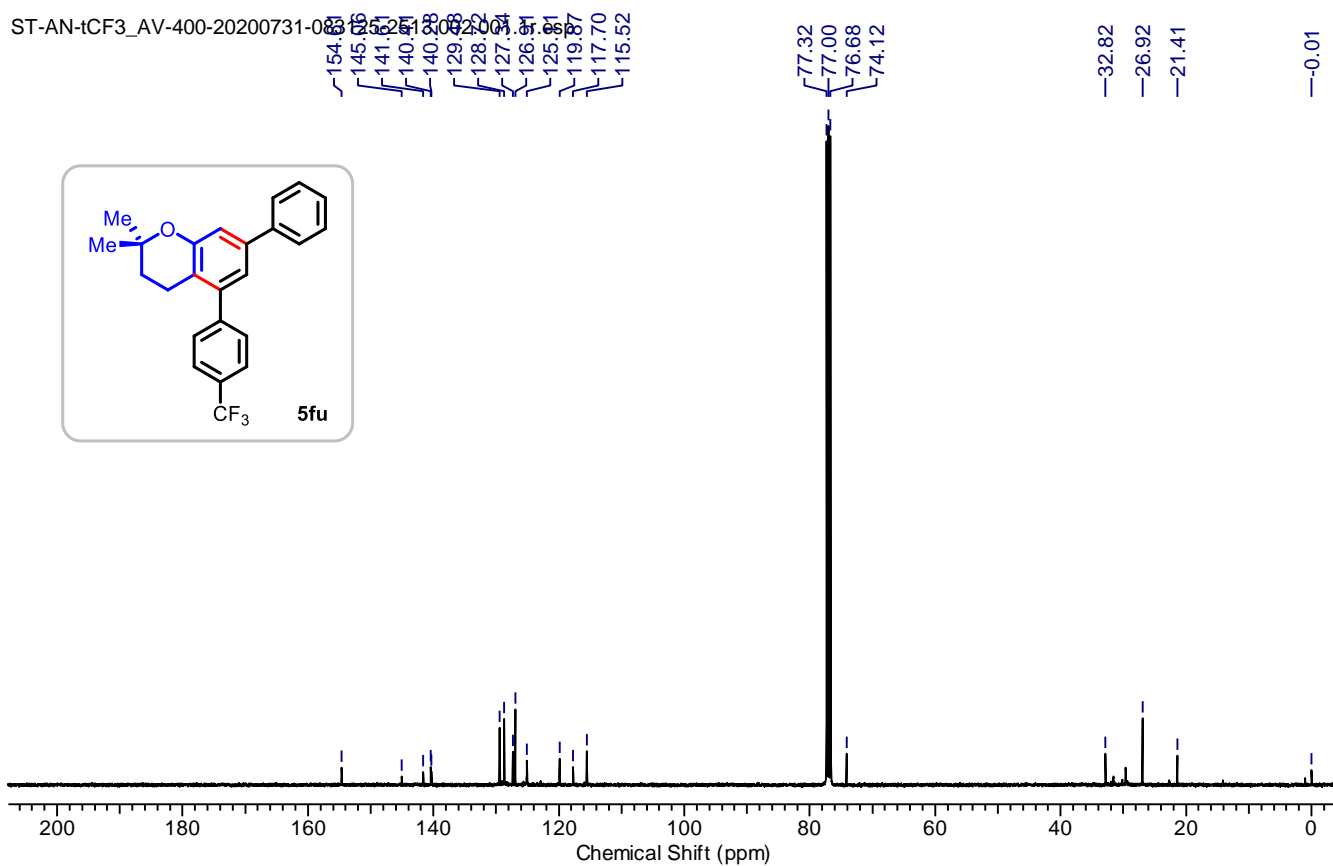

$^1\text{H}$  NMR-Spectrum (400 MHz,  $\text{CDCl}_3$ ) of **5ft**: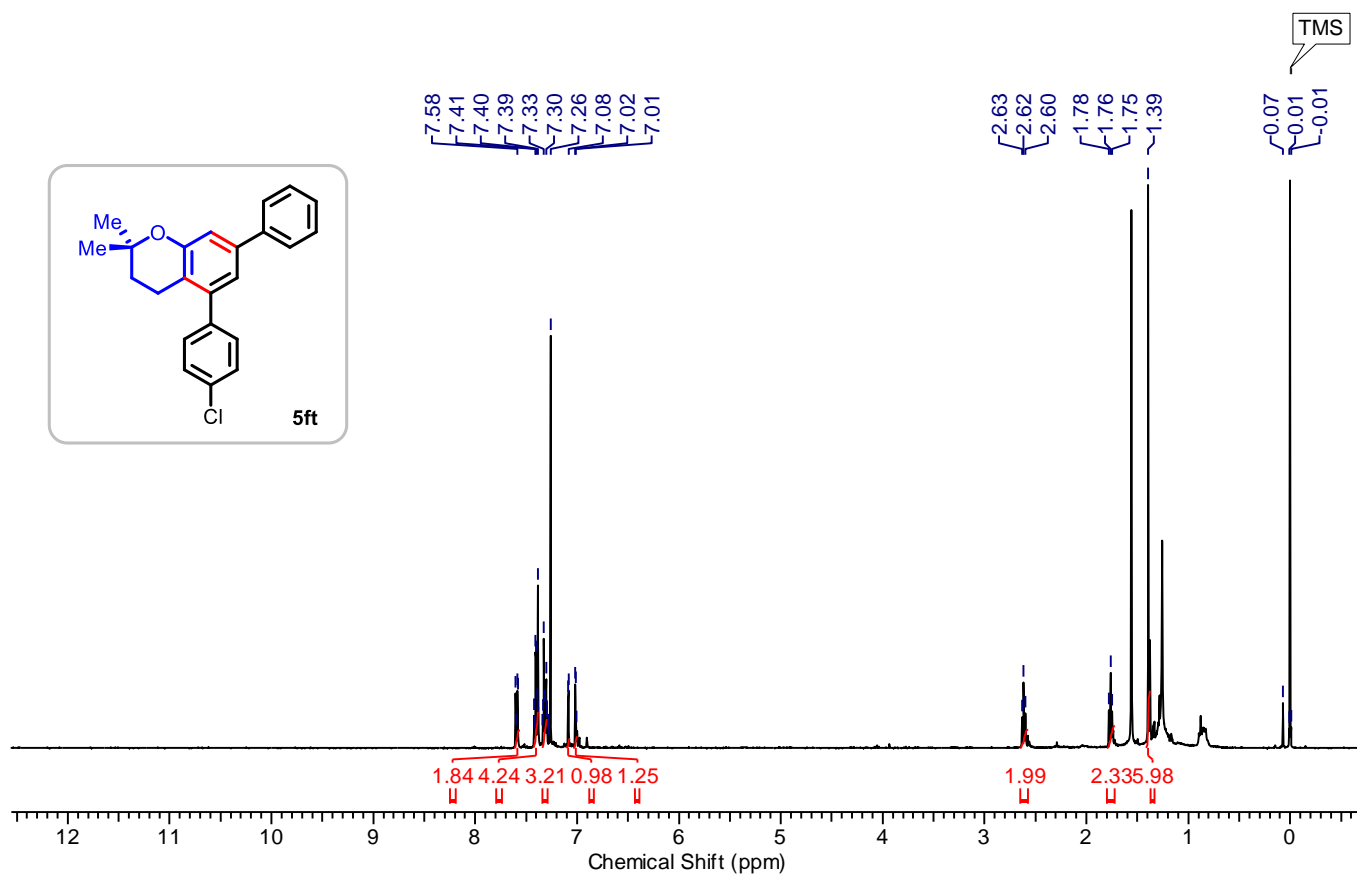 $^{13}\text{C}$  NMR-Spectrum (101 MHz,  $\text{CDCl}_3$ ) of **5ft**: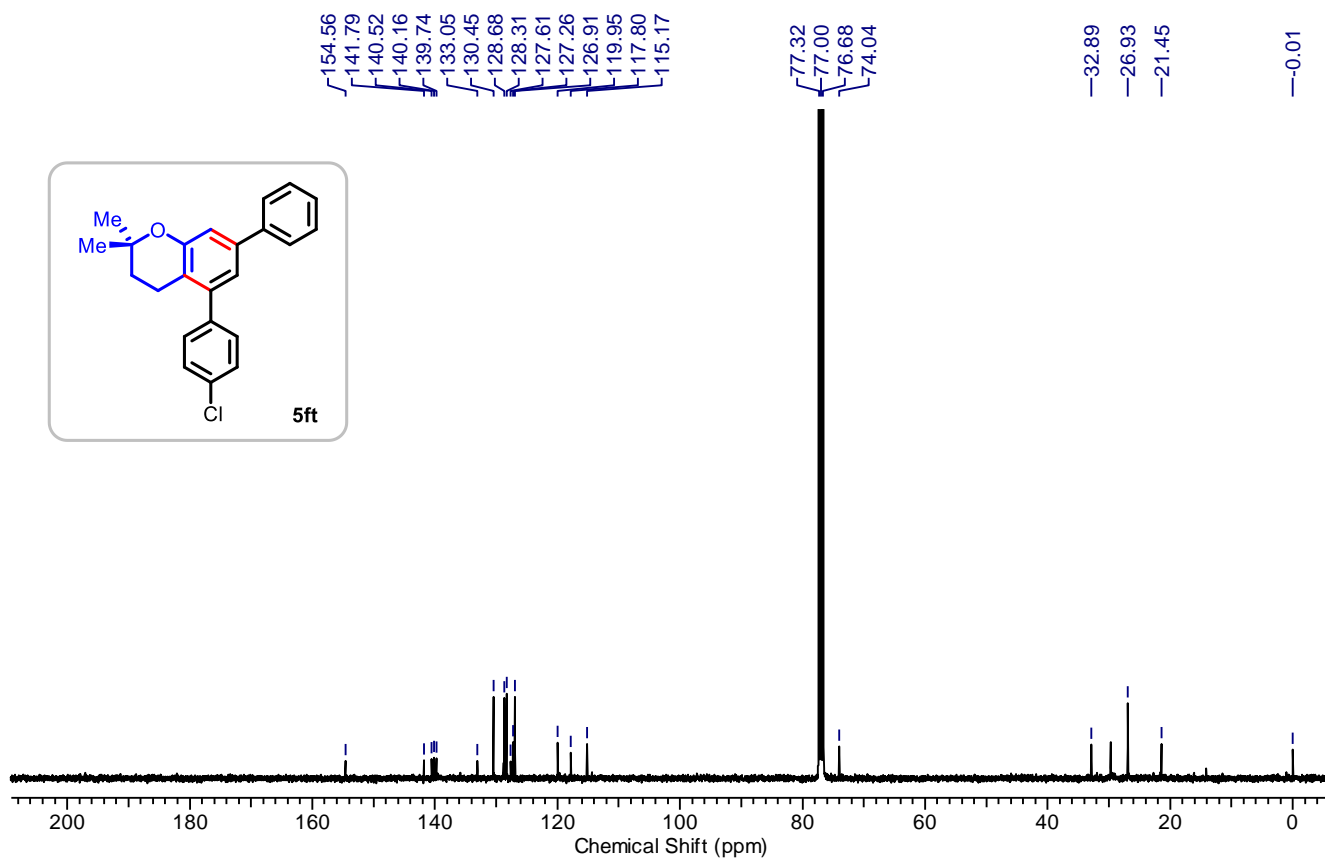

$^1\text{H}$  NMR-Spectrum (500 MHz,  $\text{CDCl}_3$ ) of **5ff**:

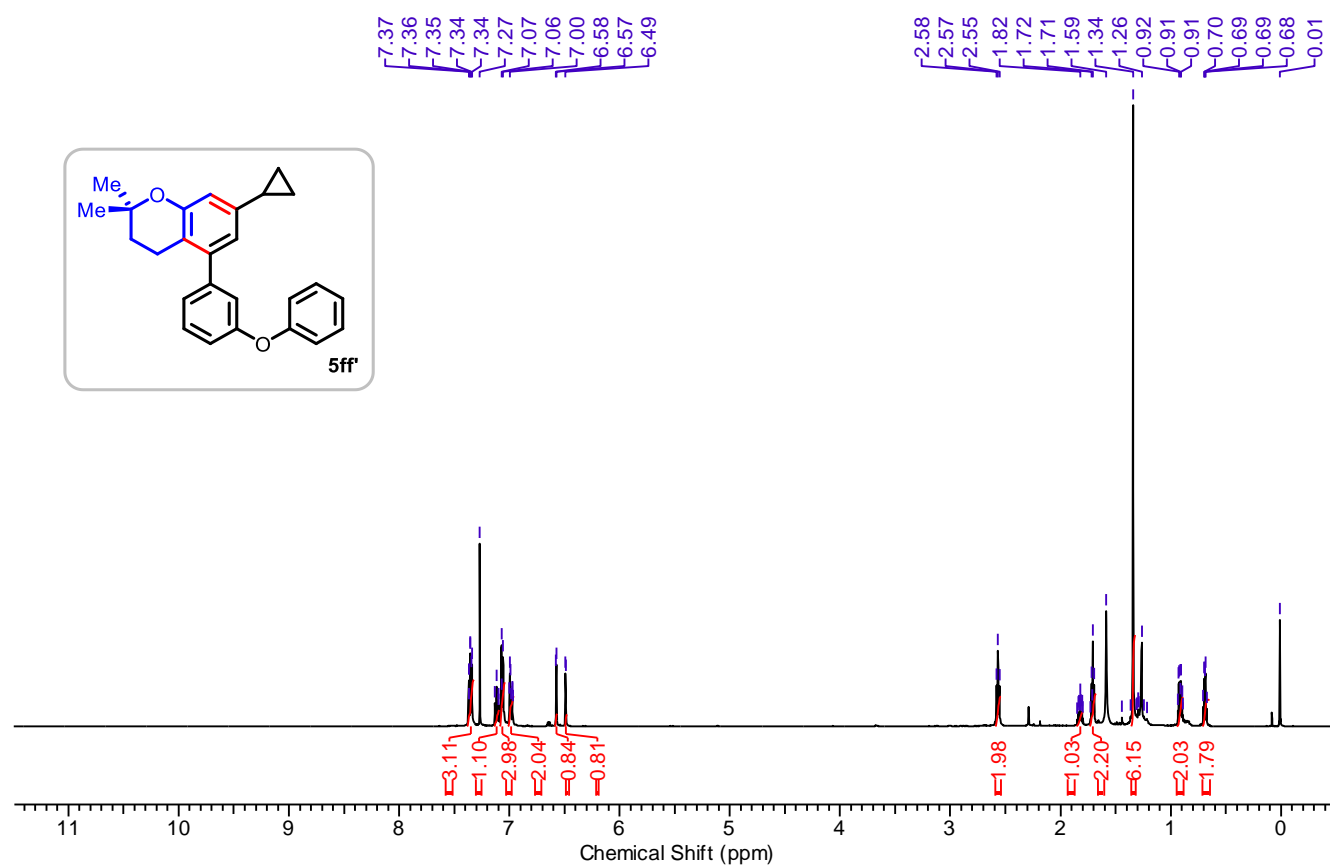

$^{13}\text{C}$  NMR-Spectrum (126 MHz,  $\text{CDCl}_3$ ) of **5ff**:

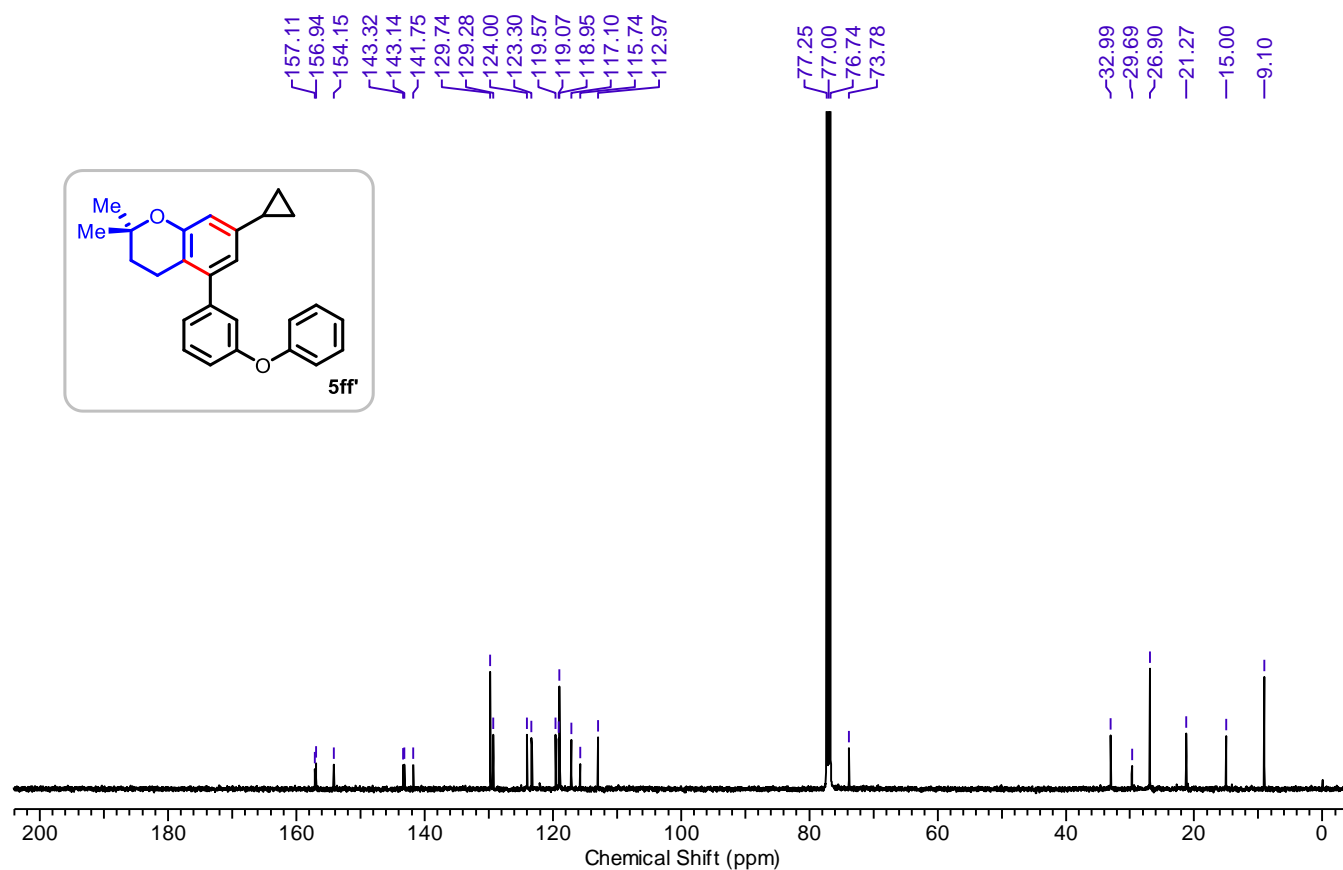

$^1\text{H}$  NMR-Spectrum (200 MHz,  $\text{CDCl}_3$ ) of **5ag'**: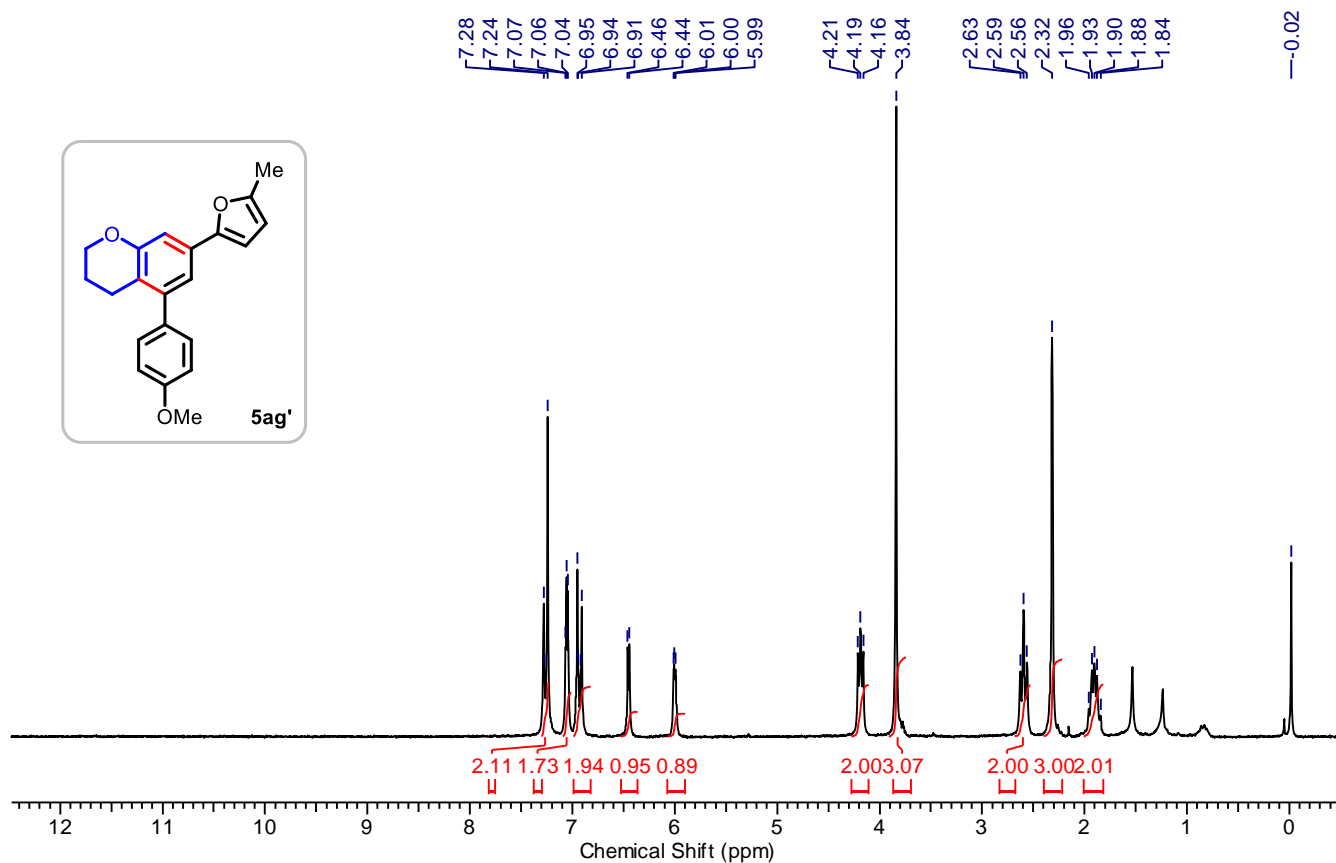 $^{13}\text{C}$  NMR-Spectrum (101 MHz,  $\text{CDCl}_3$ ) of **5ag'**: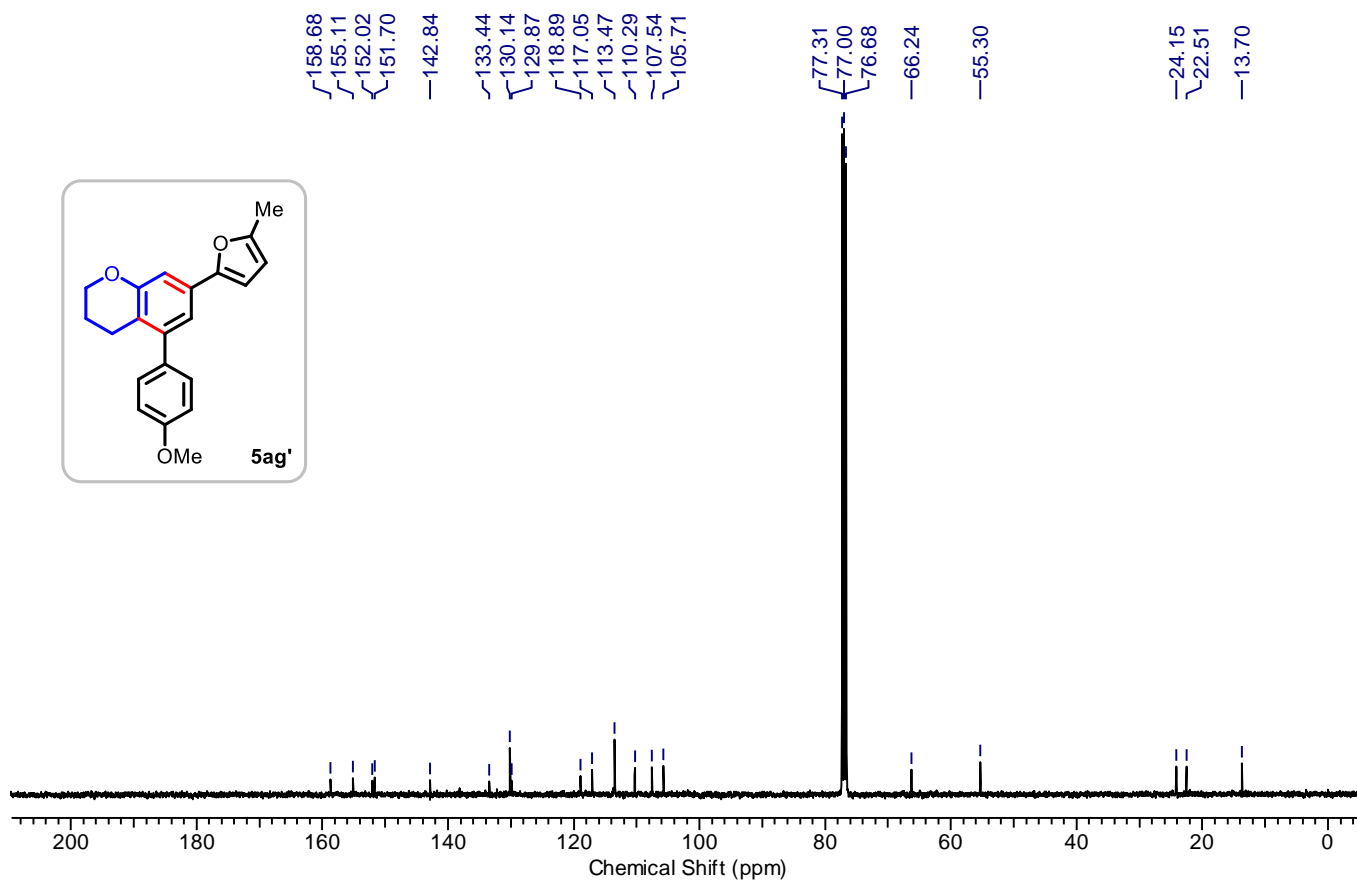

<sup>1</sup>H NMR-Spectrum (500 MHz, CDCl<sub>3</sub>) of **5ah'**: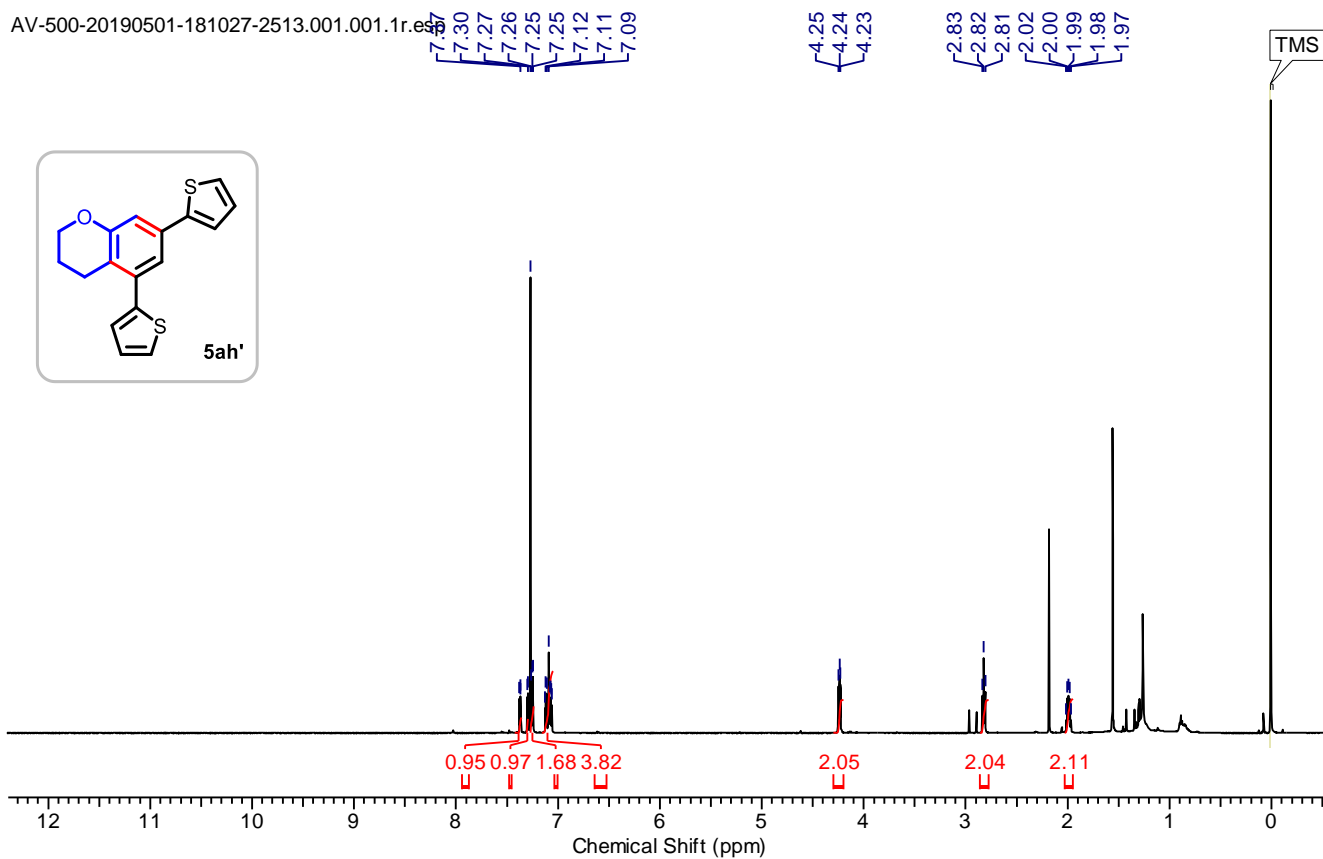<sup>13</sup>C NMR-Spectrum (126 MHz, CDCl<sub>3</sub>) of **5ah'**: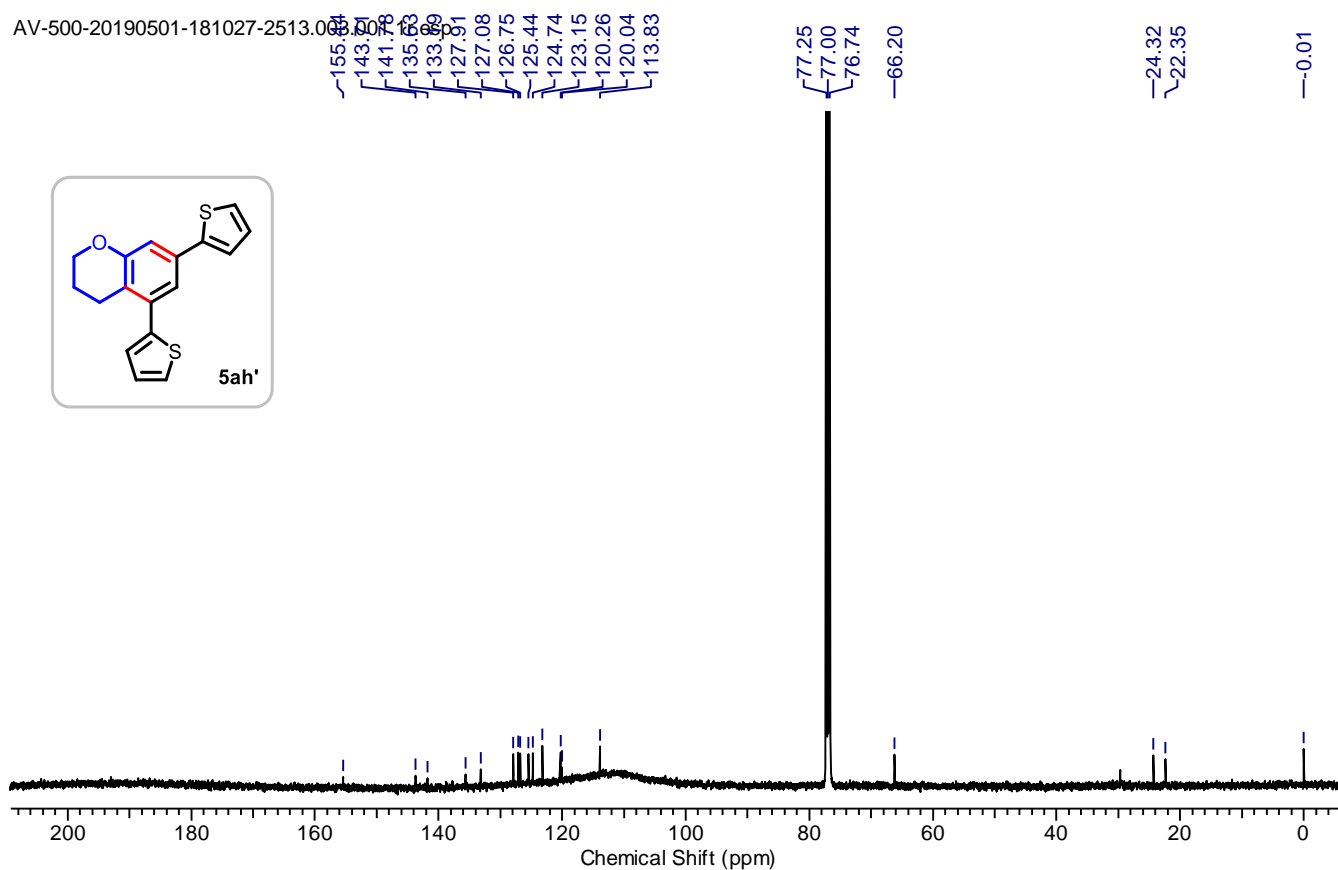



$^1\text{H}$  NMR-Spectrum (400 MHz,  $\text{CDCl}_3$ ) of **5ai'**:

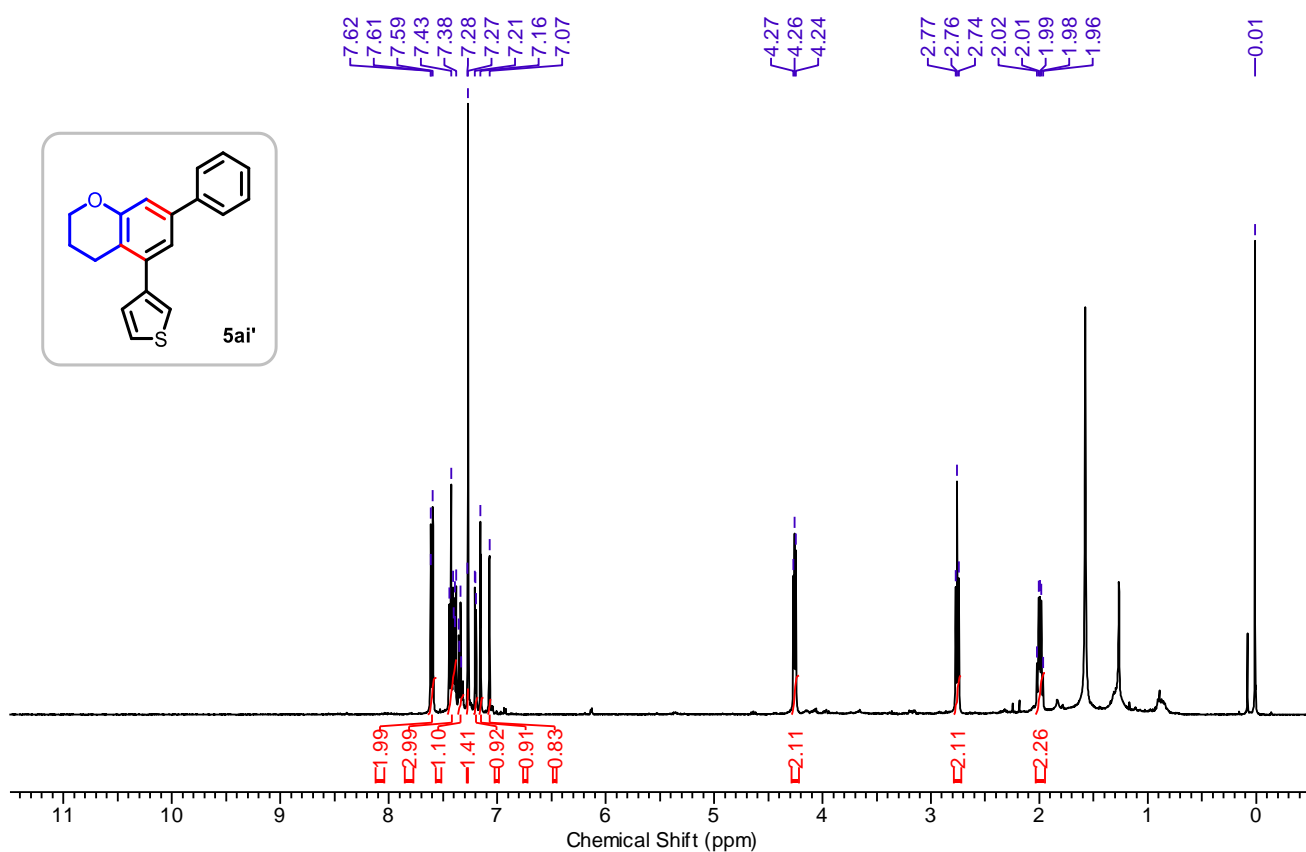

$^{13}\text{C}$  NMR-Spectrum (101 MHz,  $\text{CDCl}_3$ ) of **5ai'**:

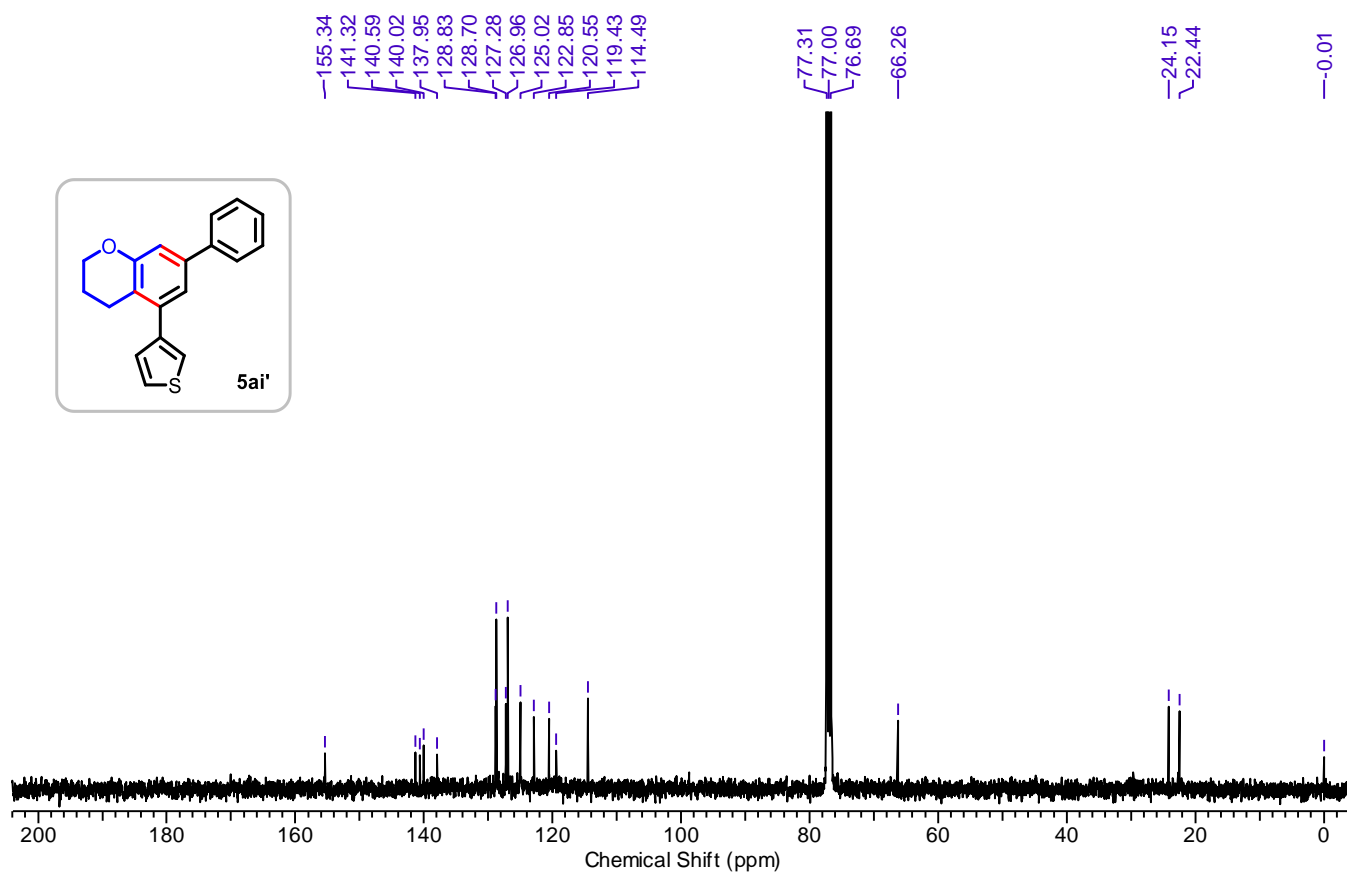

<sup>1</sup>H NMR-Spectrum (400 MHz, CDCl<sub>3</sub>) of a mixture of **5fj'** and **E5fc'**:

AV-400-20200303-164548-11738.001.001.1r.esp

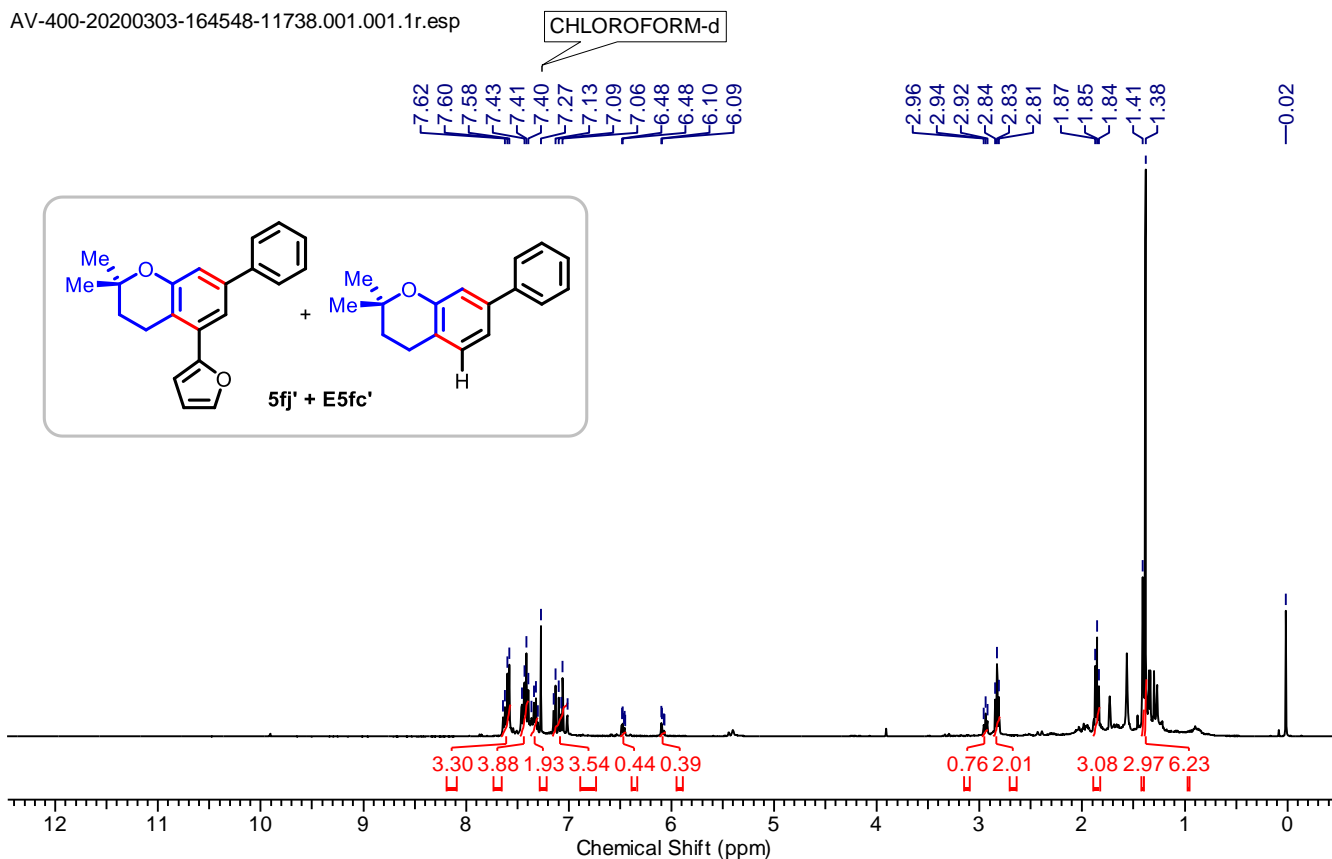<sup>13</sup>C NMR-Spectrum (101 MHz, CDCl<sub>3</sub>) of a mixture of **5fj'** and **E5fc'**:

AV-400-3.ESP

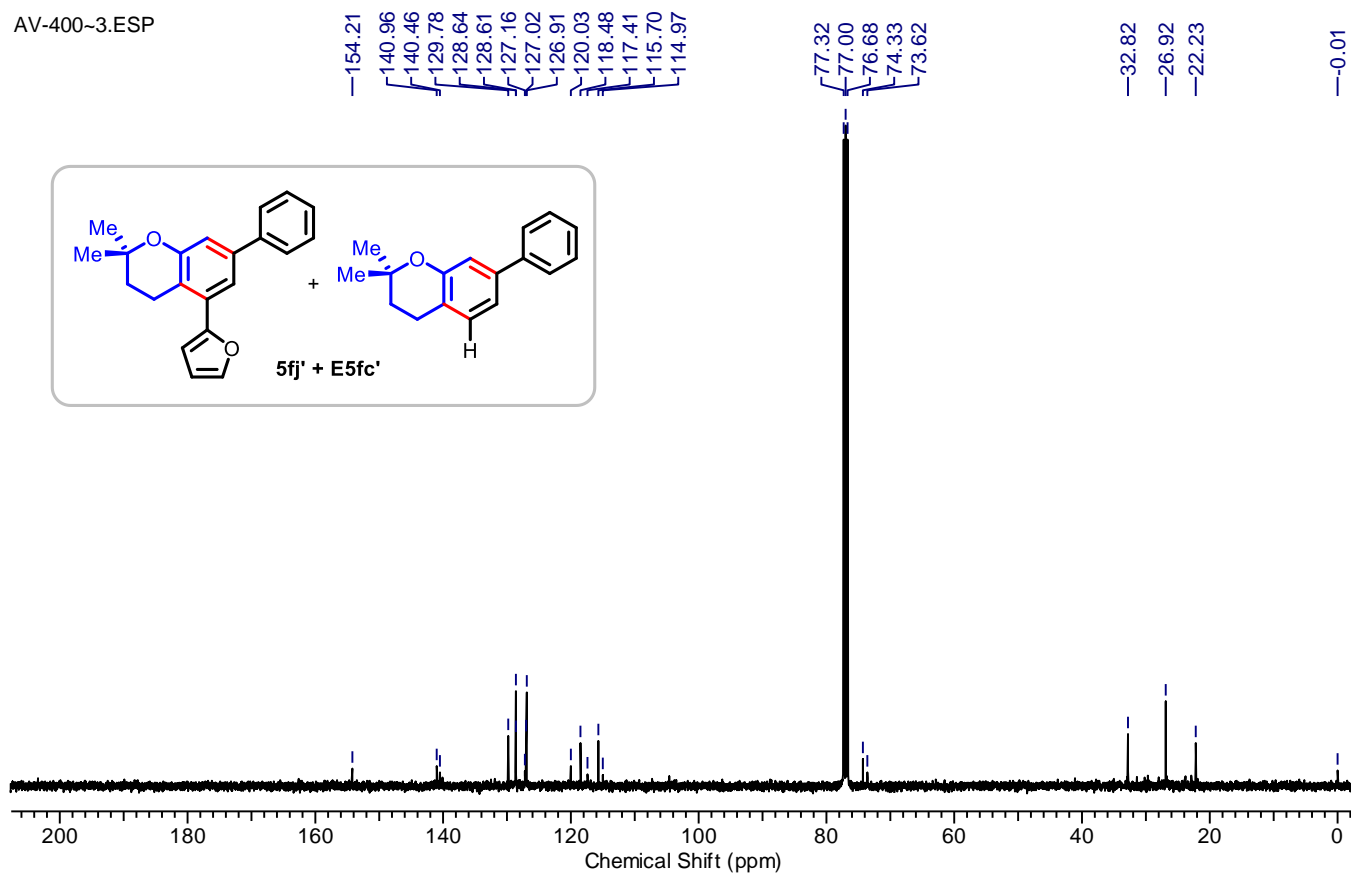

<sup>1</sup>H NMR-Spectrum (400 MHz, CDCl<sub>3</sub>) of a mixture of **5ak'** and **5ac'**:

AV-400-20190704-135500-11738\_PROTON

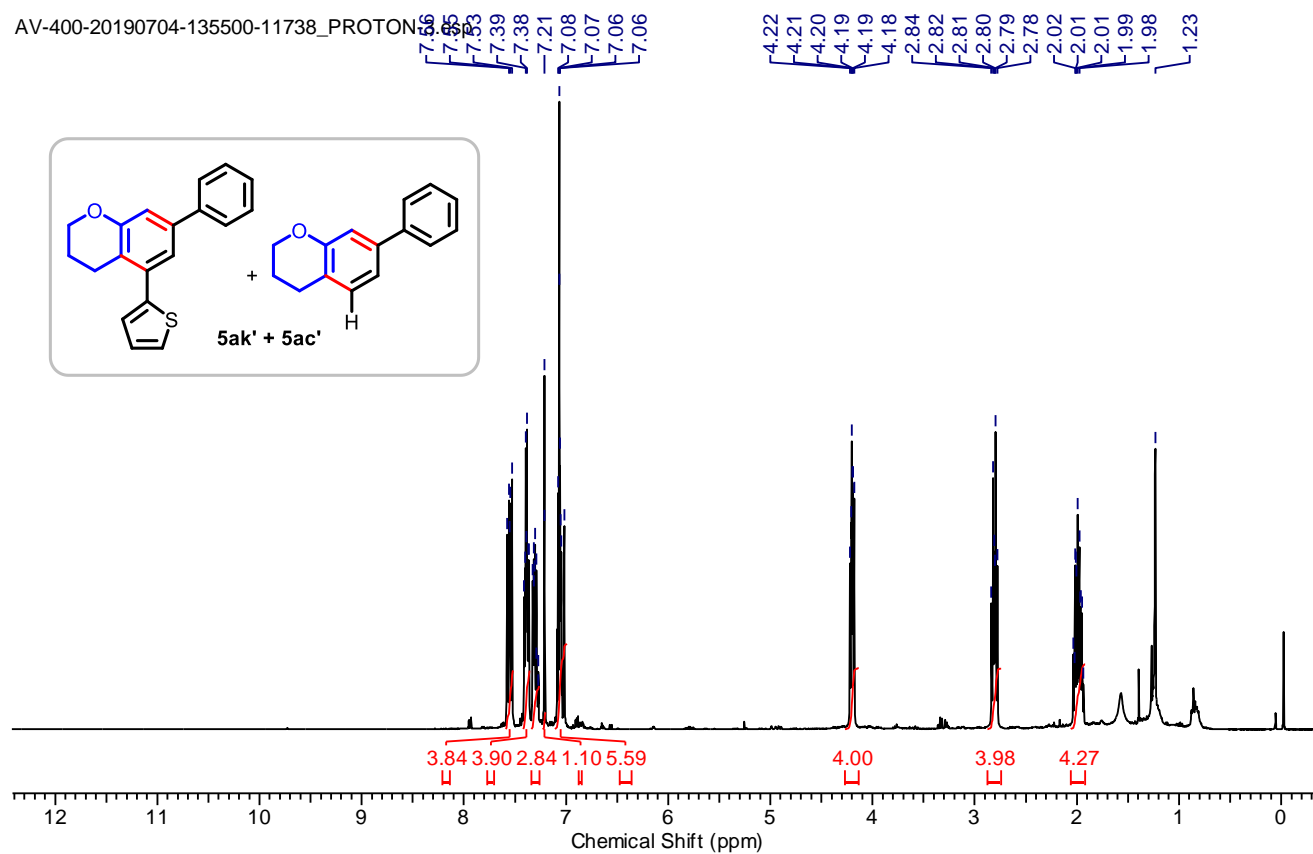<sup>13</sup>C NMR-Spectrum (101 MHz, CDCl<sub>3</sub>) of a mixture of **5ak'** and **5ac'**:

AV-400-20190704-135500-11738\_PROTON

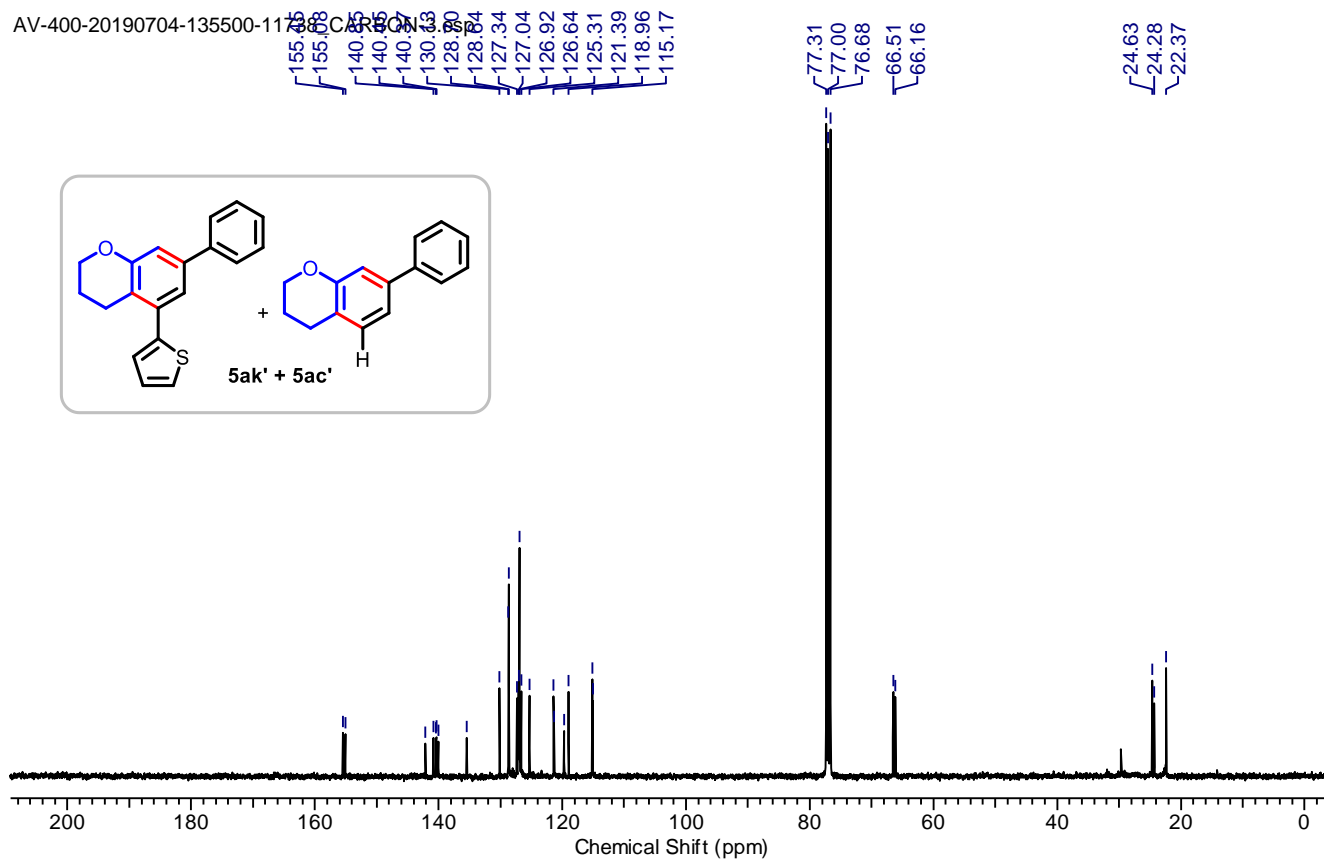

<sup>1</sup>H NMR-Spectrum (400 MHz, CDCl<sub>3</sub>) of **5ac'** (prepared from **2a** and **4l'**):

AV-200-20190708-154227-11738-56.010.001.1r.esp

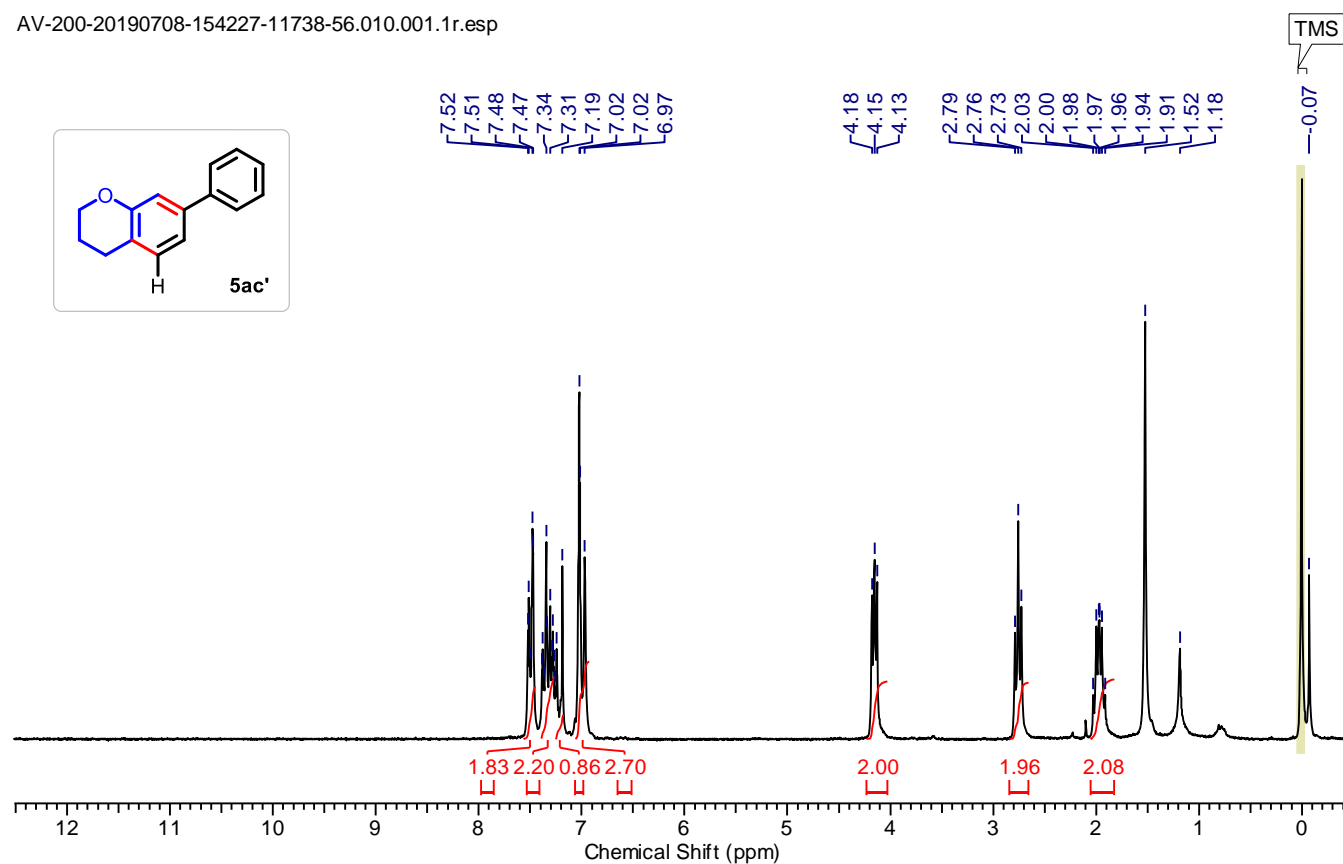<sup>13</sup>C NMR-Spectrum (101 MHz, CDCl<sub>3</sub>) of **5ac'** (prepared from **2a** and **4l'**):

AV-400-20190625-101532-11738\_CARBON.ESP

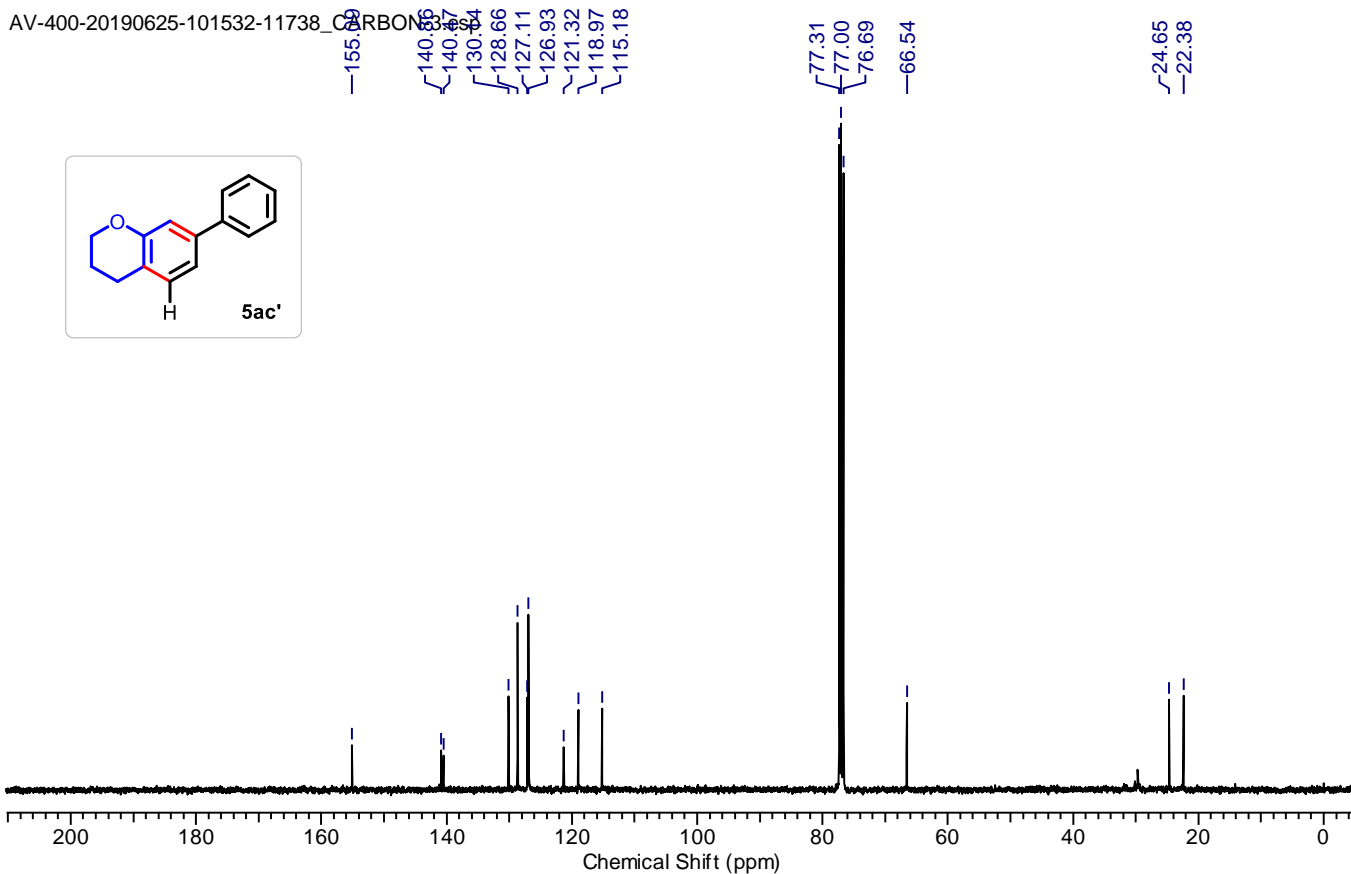

<sup>1</sup>H NMR-Spectrum (200 MHz, CDCl<sub>3</sub>) of **E5gk**(prepared from **2g** and **4k**):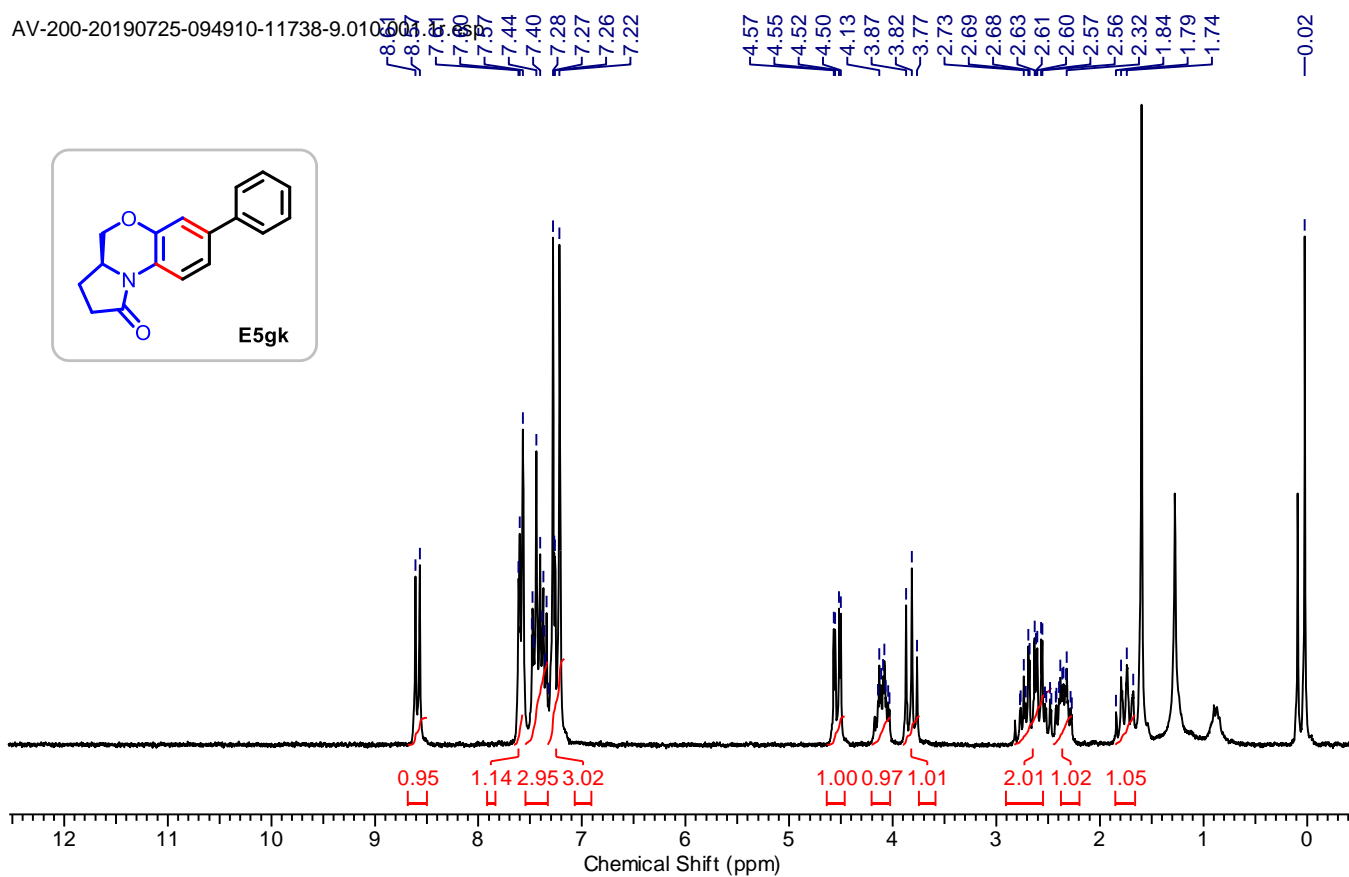<sup>13</sup>C NMR-Spectrum (126 MHz, CDCl<sub>3</sub>) of **E5gk**(prepared from **2g** and **4k**):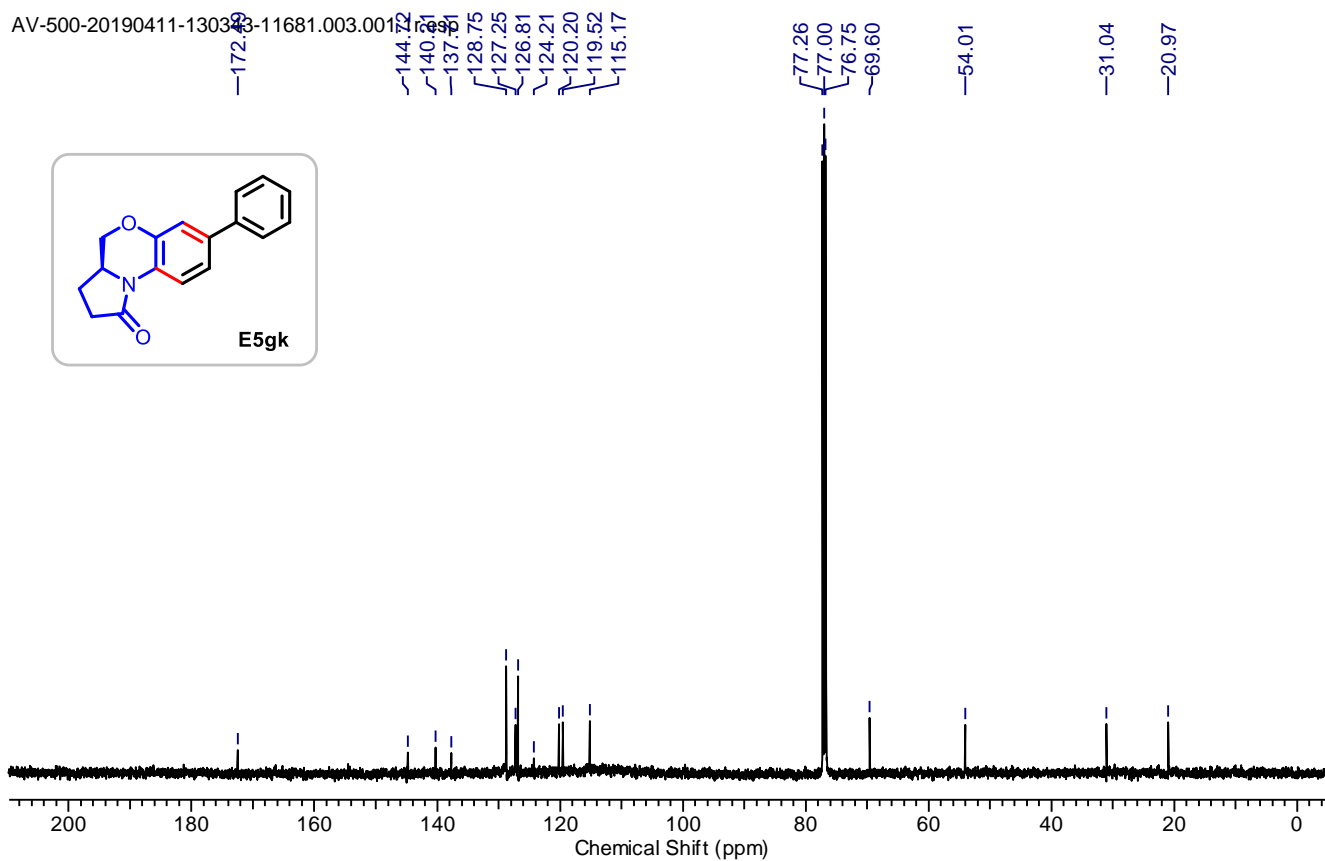

$^1\text{H}$  NMR-Spectrum (200 MHz,  $\text{CDCl}_3$ ) of **5ab** (prepared from **T3ab**):

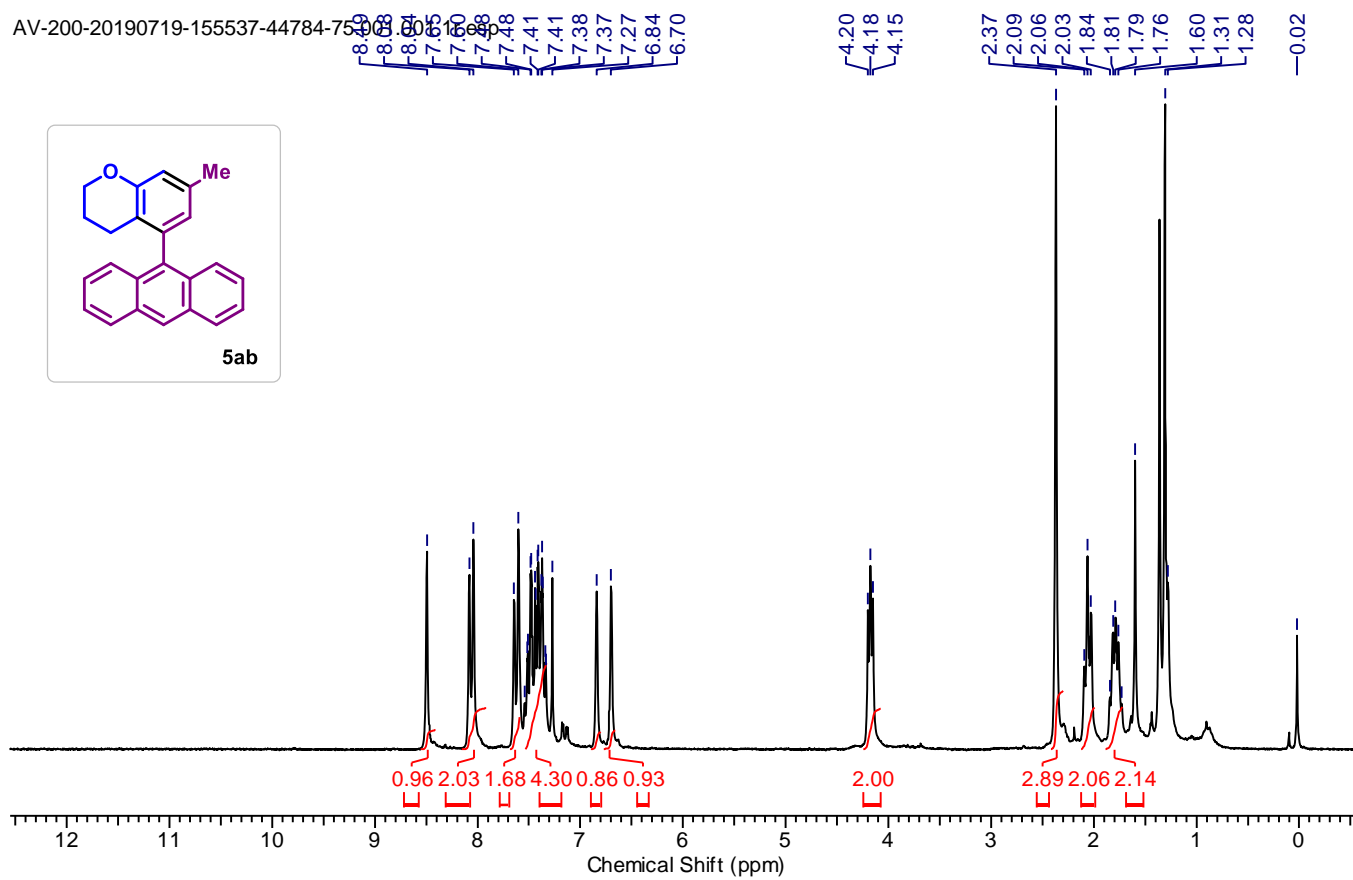

$^1\text{H}$  NMR-Spectrum (400 MHz,  $\text{CDCl}_3$ ) of **5fj'** (obtained from the reaction under oxygen atmosphere):

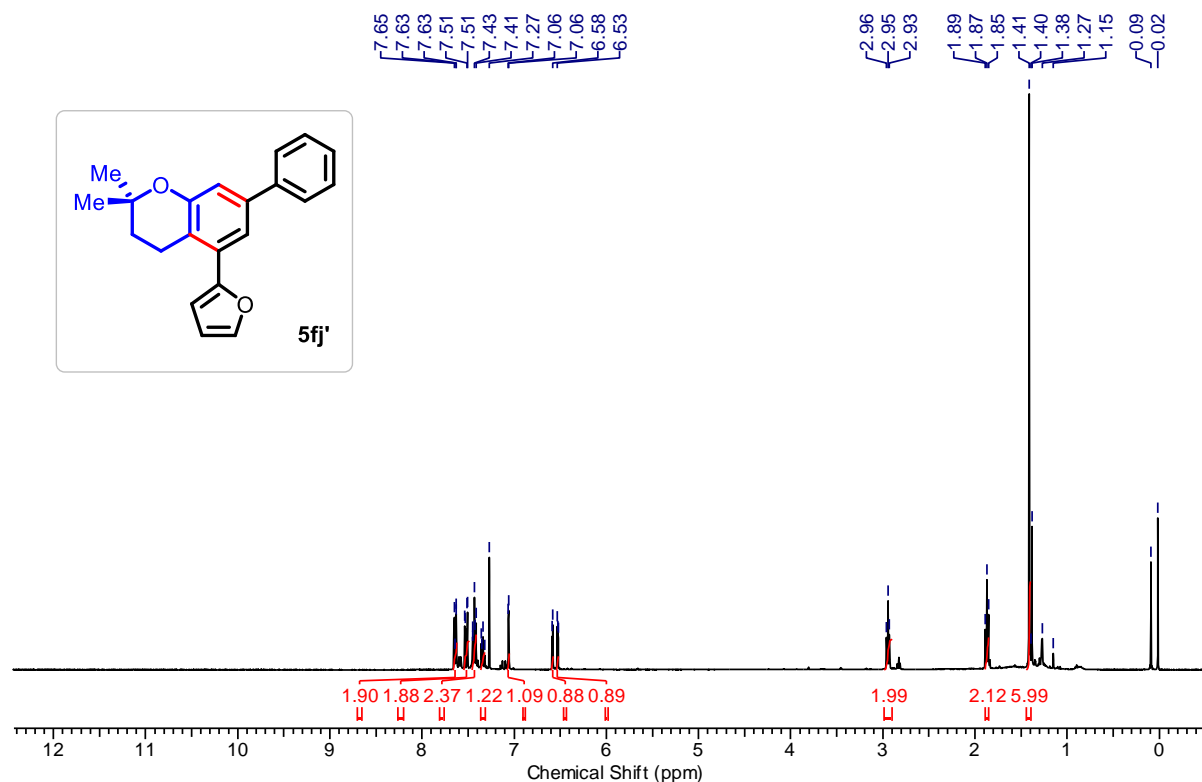

$^{13}\text{C}$  NMR-Spectrum (101 MHz,  $\text{CDCl}_3$ ) of **5fj'**:

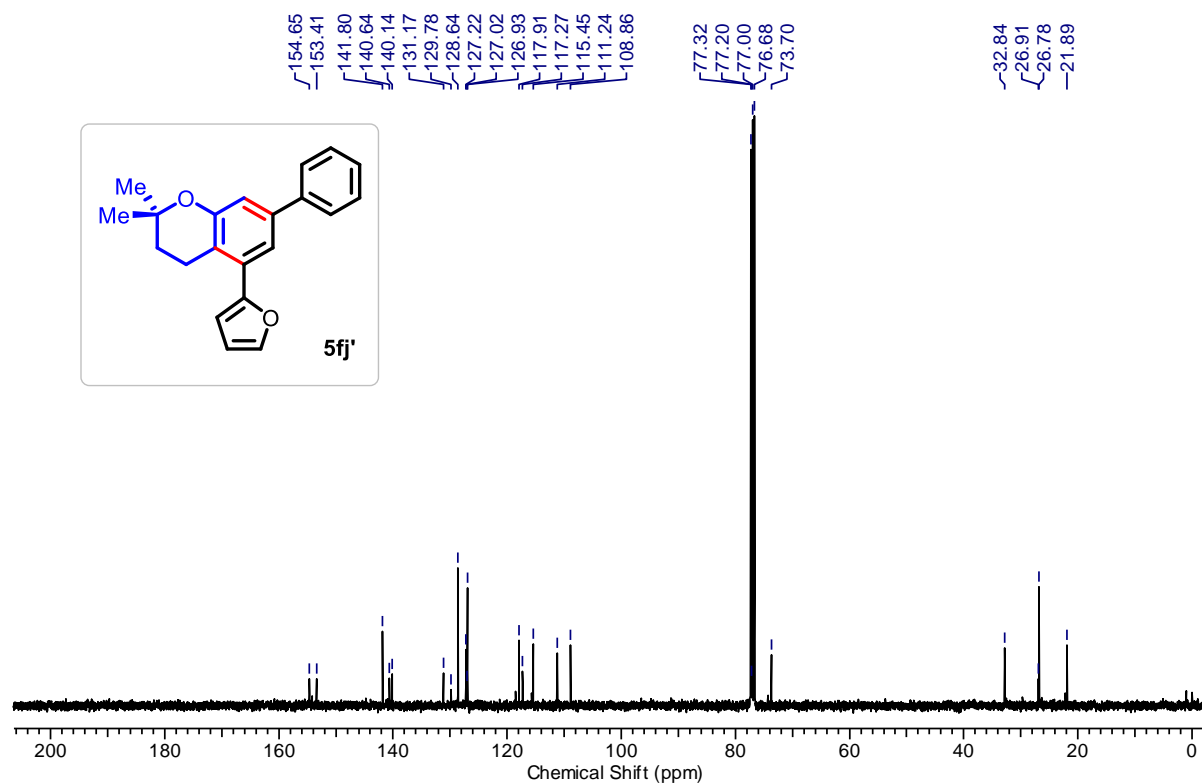

$^1\text{H}$  NMR-Spectrum (400 MHz,  $\text{CDCl}_3$ ) of **5ak'** (obtained from the reaction under oxygen atmosphere):

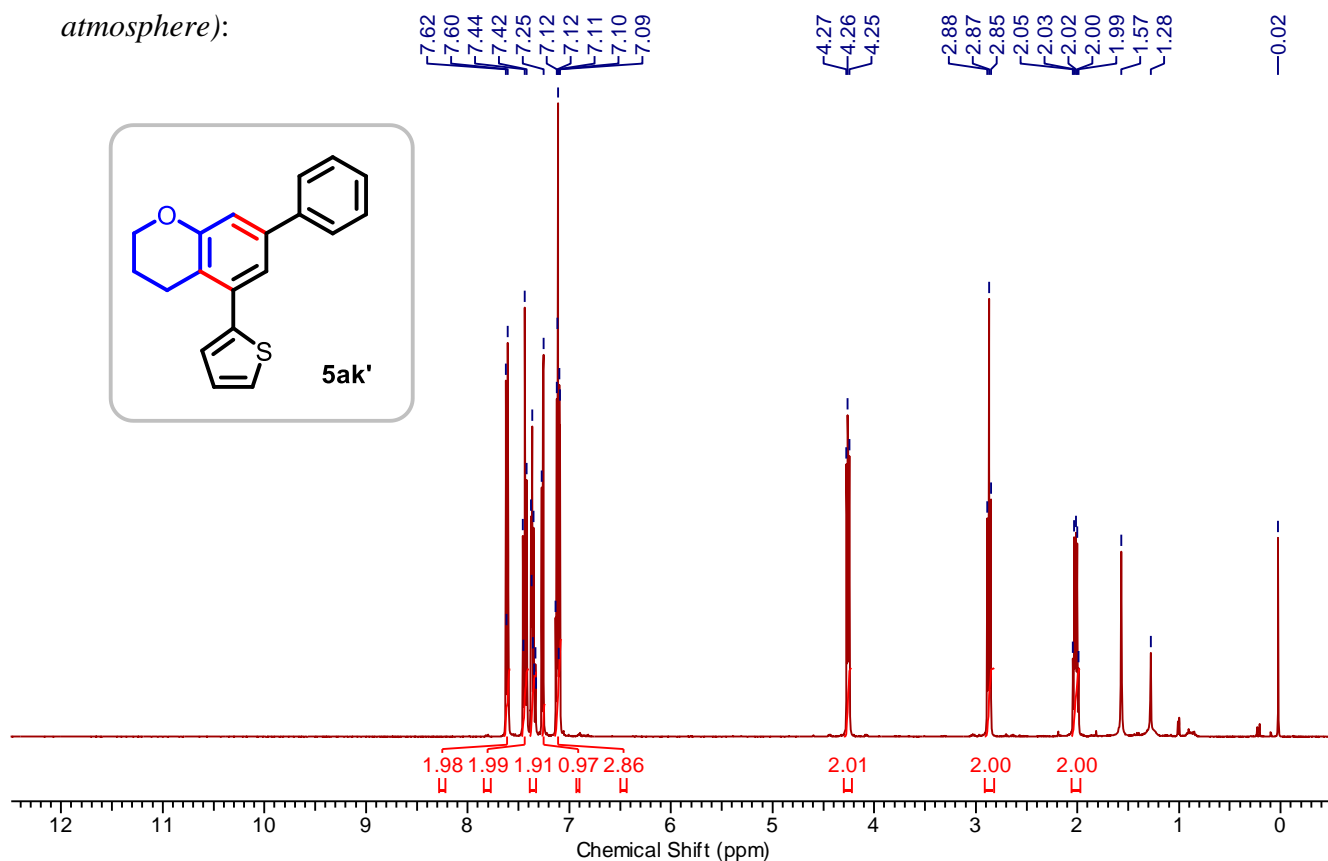

$^{13}\text{C}$  NMR-Spectrum (101 MHz,  $\text{CDCl}_3$ ) of **5ak'**:

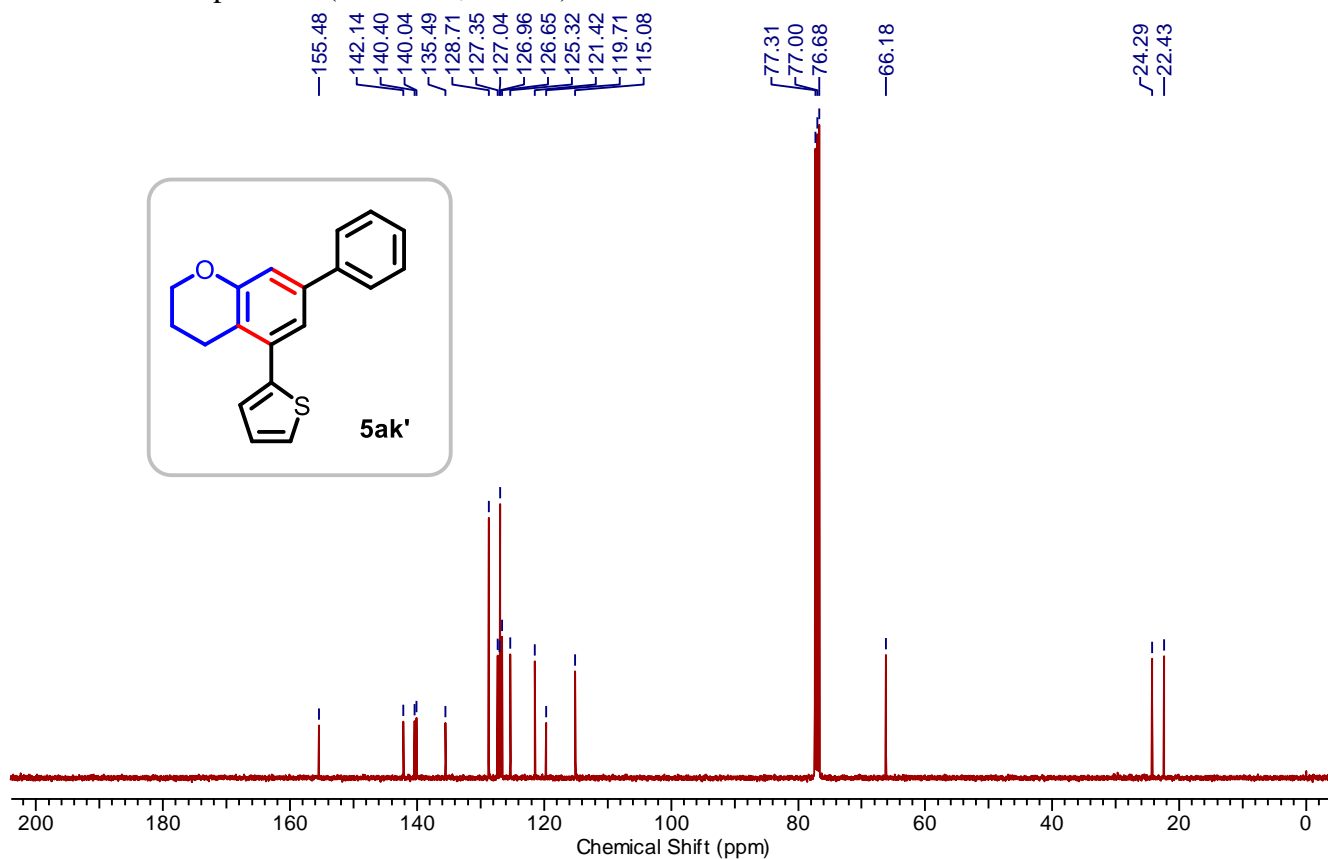

Supplement: d1qo01643a1.pdf [file d1qo01643a1.pdf]
